# Supplementary material
Source: Royal Society of Chemistry journal article supplement (doi:10.1039/d6np00004e)
Supplement: d6np00004e1.xlsx [file d6np00004e1.xlsx]

## Sheet: compound_records1
smiles	year	level	category	genus	kingdom
C[C@@]12CC[C@@H](O)[C@@](C)(C=O)[C@H]1CCC1=C[C@@](C)([C@@H](O)CO)CC[C@H]12	2020	New modifications	Diterpenoids	Sigesbeckia	Viridiplantae
C=C(C)[C@@H]1CC[C@]2(C)CC[C@]3(C)[C@H](CC[C@@H]4[C@@]5(C)CC[C@@H](OC(=O)CCCCCCCCCCCCCCC)C(C)(C)[C@@H]5CC[C@]43C)[C@@H]12	2020	New modifications	Triterpenoids	Sambucus	Viridiplantae
CC1(C)C[C@H]2C3=CC[C@@H]4[C@@]5(C)CC[C@H](O)[C@@](C)(CO[C@@H]6O[C@H](CO)[C@@H](O)C(O)[C@H]6O[C@@H]6O[C@H](CO)[C@@H](O)C(O)[C@H]6O)[C@@H]5CC[C@@]4(C)[C@]3(C)CC[C@@]2(C(=O)O)C[C@@H]1O[C@@H]1O[C@H](CO)[C@@H](O)C(O)[C@H]1O	2020	Site combinations	Triterpenoids	Anchusa	Viridiplantae
Cc1ccc2cc(C(C)C)c(O)c3c2c1C=C3C=O	2020	New skeletons	Others	Salvia	Viridiplantae
CC1(C)CCC[C@@]2(C)[C@H]1CC=C(C=O)[C@@H]2C=O	2020	New modifications	Sesquiterpenoids	Tasmannia	Viridiplantae
CC1=C(C(=O)O)[C@@H]2[C@H](CO)[C@@]1(C)CC[C@@H]2C(C)C	2020	New modifications	Sesquiterpenoids	Bipolaris	Fungi
CC(=O)O[C@@H]1[C@H](O)[C@@]2(C)[C@@H]3CCc4c(cc(O[C@@H]5O[C@H](CO)[C@@H](O)[C@H](O)[C@H]5O)c(O)c4C)[C@]3(C)C(=O)C[C@]2(C)[C@H]1[C@@](C)(O)C(=O)/C=C/C(C)C	2020	New sites	Triterpenoids	Mareya	Viridiplantae
CC(=O)O[C@H]1O[C@@H]2OC(=O)[C@@H](C)C3=C([C@@]4(C)CCCC(C)(C)C4)CC[C@H]1[C@@H]32	2020	New modifications	Diterpenoids	Dendrilla	Metazoa
CC[C@@]1(C)CC[C@]2(C)C[C@@]34[C@@H](C)C=CC(=O)[C@]3(C)C[C@H](O)[C@H]4[C@H]12	2020	New skeletons	Diterpenoids	Penicillium	Fungi
C=C(CCCCCCC)OOCCCCCCC[C@@H]1CC[C@@]2(C)C(CC[C@]3(C)C2CCC2C4C(C(=C)C)CC[C@]4(C)C[CH][C@]23C)C1(C)C	2020	New skeletons	Triterpenoids	Globimetula	Viridiplantae
CC(C)[C@]12C=C3[C@H](O)C[C@H]4[C@@]5(C)CC[C@H](OC5=O)[C@]4(C)[C@@]3(CC1)OO2	2020	Site combinations	Diterpenoids	Lophanthus	Viridiplantae
C[C@@H]1OC(O[C@H]2[C@H](O[C@H]3CC[C@@]4(C)C(CC[C@]5(C)C4CC=C4C6C[C@H](CO)CC[C@]6(C(=O)O)CC[C@]45C)C3(C)C)OC[C@H](O)[C@@H]2O)[C@H](O)[C@H](O)[C@H]1O	2020	New sites	Triterpenoids	Stauntonia	Viridiplantae
CCO[C@H]1C[C@]2(O)[C@@H]3C[C@H](O[C@@H]2O1)C1([C@]2(C)[C@H](O)[C@@H]4OC[C@@]5(C)[C@H]4[C@]4(CO[C@](O)(C(=O)OC)[C@H]42)[C@@H](OC(=O)/C=C/c2ccccc2)C[C@H]5OC(=O)/C=C/c2ccccc2)O[C@@]31C	2020	New modifications	Triterpenoids	Melia	Viridiplantae
CC(=O)O[C@@H]1C[C@@]23C[C@@]24CC[C@H](O[C@@H]2OC[C@@H](O)[C@H](O)[C@H]2O)C(C)(C)[C@@H]4CC=C3[C@]2(C)C[C@@H]3OC([C@H](O)C(C)(C)O)=C[C@@H](C)[C@@H]3[C@@]12C	2020	New modifications	Triterpenoids	Actaea	Viridiplantae
C[C@@]1(C(=O)O)C=C2CC[C@H]3[C@@](C)(CCC(=O)[C@@]3(C)CO)[C@@H]2CC1	2020	Site combinations	Diterpenoids	Sigesbeckia	Viridiplantae
CCN1C[C@]2(COC)CC[C@H](OC)C34C1OC(C=C1C[C@H](OC)C5C[C@@H]3[C@@H]1[C@H]5O)C42	2020	New skeletons	Diterpenoids	Aconitum	Viridiplantae
CC1(C)CCC[C@]2(C)[C@H]3CC(=O)C4=C(C[C@H]5[C@@H]4C(=O)O[C@@]46C[C@H]7[C@@H](CC[C@H]8C(C)(C)CCC[C@]78C)[C@@]7(C)O[C@@]57[C@H]4O6)[C@@H]3CC[C@@H]12	2020	New skeletons	Others	Pterolobium	Viridiplantae
CC(=O)O[C@H]1CC[C@@]2(C)[C@@H](C(=O)[C@H](O)[C@@H](C)[C@]2(O)CCc2ccoc2)C1(C)C	2020	New modifications	Diterpenoids	Leonurus	Viridiplantae
CC1=CC(=O)C[C@](C)(CO)[C@@]1(O)/C=C/C(C)=C\C(=O)O	2020	New modifications	Sesquiterpenoids	Capsicum	Viridiplantae
COc1ccc2c(c1OC)N[C@@]13CC[C@]45CCCN6C[C@H](C(=O)[C@@]1(O)C4)[C@]23[C@@H]65	2020	New skeletons	Others	Kopsia	Viridiplantae
C=C1C(=O)O[C@@H]2/C=C(/C)[C@@]3(O)C=C[C@@](C)(C[C@@H](OC(=O)C(C)C)[C@@H]12)O3	2020	New modifications	Sesquiterpenoids	Tithonia	Viridiplantae
CC1=C2C(=O)OC[C@@H](C(=O)OC[C@H]3O[C@@H](O[C@@H]4OC=C[C@]5(O)[C@H]4[C@@]4(C)O[C@H]4[C@H]5O)[C@H](O)[C@@H](O)[C@@H]3O)[C@H]2CC1	2020	New modifications	Monoterpenoids	Linaria	Metazoa
CC(C)[C@@H]1CC[C@@H](C)[C@@]12CC=C(CO)C(=O)C2	2020	New modifications	Sesquiterpenoids	Daphne	Viridiplantae
C=C(C=O)[C@@H]1C[C@H](O)[C@@H]2[C@]3(C1)C(=O)OC[C@]21[C@@H](OC(C)=O)CCC(C)(C)[C@H]1[C@@H]3O	2020	New modifications	Diterpenoids	Isodon	Viridiplantae
CC1(C)C(=O)CCC2(C)C3=C(CC[C@@H]12)[C@]1(C)[C@@H](O)CC(=O)[C@@]1(C)CC3=O	2020	New skeletons	Triterpenoids	Ganoderma	Fungi
C/C(C=O)=C\CCC(C)[C@@H]1CC[C@@]2(C)[C@@H]3C(=O)C=C4[C@@H](CC[C@H](O[C@@H]5O[C@H](CO)[C@@H](O)[C@H](O)[C@H]5O)C4(C)C)[C@]3(C)C(=O)C[C@]12C	2020	Site combinations	Triterpenoids	Hemsleya	Viridiplantae
CC(=O)O[C@@H]1C[C@]2(C)[C@H](CC[C@@H](O)[C@]2(C)O)[C@@]2(C[C@@H](c3ccoc3)O[C@@H]2O)[C@@H]1C	2020	New modifications	Diterpenoids	Croton	Viridiplantae
COC(=O)[C@@]12C(=O)[C@](C)(O)C(=O)[C@]1(C)C(C)=C[C@@H]1[C@]2(C)C[C@@H]2OC(=O)[C@]13CC[C@H](OC(C)=O)C(C)(C)[C@@H]23	2020	New modifications	Meroterpenoids	Penicillium	Fungi
CCC(O)(CC)[C@H]1CC[C@@H](CC2CC3[C@H](O)Cc4c(ccc(C)c4CCC(=O)C(C)C)C3(C)C2=O)[C@@H]1O	2020	New skeletons	Triterpenoids	Inonotus	Fungi
C=C1[C@@H](O)[C@H](O)C[C@]2(C)CC[C@@H]([C@@](C)(O)CO)C[C@@H]12	2020	Site combinations	Sesquiterpenoids	Datura	Viridiplantae
C[C@H]1C(=O)CC[C@H]2[C@]3(C)CC[C@@]4(C)[C@@H]5C[C@](C)(C(=O)O)CC[C@]5(C)CC[C@]4(C)[C@H]3CC[C@@]21C	2020	New modifications	Triterpenoids	Tripterygium	Viridiplantae
C[C@H]1C(=O)CC[C@@]2(C)CCCC[C@]12O	2020	New modifications	Sesquiterpenoids	Streptomyces	Bacteria
CC(=O)O[C@@H]1[C@@H](O)[C@@]2(C)C(CC[C@]3(C)C2[C@H](O)C=C2C4[C@@H](C)[C@@](C)(O)CC[C@]4(C)CC[C@]23C)C(C)(C)[C@H]1OC(C)=O	2020	New sites	Triterpenoids	Salvia	Viridiplantae
C=C[C@@]1(C)CC[C@H]2C(=CC[C@H]3[C@](C)(C(=O)O)CCC[C@]23C)C1	2020	New modifications	Diterpenoids	Dracaena	Metazoa
C=C(C)[C@@H]1/C=C/[C@@H](C)OC(=O)[C@H]2C[C@@H](C)[C@@H](OC(C)=O)/C2=C/[C@](C)(O)C(=O)C1	2020	New skeletons	Diterpenoids	Jatropha	Viridiplantae
CC(=O)OC/C1=C\[C@@H](O)[C@@H](OC(C)=O)/C(C)=C/[C@H]2[C@@H](C[C@H]1OC(=O)CCc1ccccc1)[C@]2(C)CO	2020	New modifications	Sesquiterpenoids	Plagiochila	Viridiplantae
C[C@@H]1/C=C/C(C)(C)[C@H](O)CC/C(CO)=C/CC1	2020	Site combinations	Sesquiterpenoids	Conocephalum	Viridiplantae
C=C(C)C(=C)/C=C1/CC[C@H]2C(C)=C(C)CC[C@]2(C)C1=C	2020	New skeletons	Diterpenoids	Nacna	Metazoa
C=C1CC[C@@H](Br)C(C)(C)[C@]12CC=C(C)[C@@H](C(C)=O)C2	2020	New skeletons	Others	Laurencia	Others
C=C(C)[C@@H]1CC[C@]2(C)CC[C@]3(C)[C@H](CC[C@@H]4[C@@]5(C)CC(=O)OC(C)(C)[C@@H]5CC[C@]43C)[C@@H]12	2020	New sites	Triterpenoids	Juglans	Viridiplantae
C=C(CC[C@@H]1C(=C)CC[C@H]2[C@@](C)(CO)CCC[C@]12C)C(=O)CO	2020	New modifications	Diterpenoids	Hesperocyparis	Viridiplantae
[CH][C@]1(C)CC[C@]2(C(=O)O)CC[C@]3(C)C(=CC[C@@H]4[C@@]5(C)C[C@H](O)[C@@H](O)[C@@](C)(CO)[C@@H]5[C@@H](O)C[C@]43C)[C@@H]2C1	2020	New modifications	Triterpenoids	Rhodomyrtus	Viridiplantae
C=C[C@@]1(C)C[C@@H](O)[C@@H]2[C@@]3(C)[C@@H](OC(=O)c4ccccc4)[C@@H](OC(C)=O)C(=O)C(C)(C)[C@@H]3C[C@@H](OC(C)=O)[C@@]2(O)[C@@H]1OC(C)=O	2020	New modifications	Diterpenoids	Clerodendranthus	Viridiplantae
CC(=O)O[C@]1(C)C[C@@]23C[C@@H](O)[C@@]4(O)[C@@H](C[C@H](O)C4(C)C)[C@](C)(O)[C@@H]2CC[C@@H]1[C@H]3O	2020	New modifications	Diterpenoids	Rhododendron	Viridiplantae
Cc1cc2c(cc1O)C1=C(CC[C@H]2C)C(=O)OC1	2020	New sites	Sesquiterpenoids	Irpex	Fungi
Cc1cc2c3c(coc3c1O)C(=O)C[C@H]2C(C)(C)O	2020	New sites	Sesquiterpenoids	Talipariti	Viridiplantae
C[C@H]1CC=C2[C@H](CCCOC2(C)C)[C@@]1(C)COc1ccc2ccc(=O)oc2c1	2020	New sites	Sesquiterpenoids	Ferula	Viridiplantae
CC(=O)O[C@@H]1CC/C(C)=C/[C@H](O)C/C(C)=C\C[C@]2(C(C)C)CC[C@@]1(C)O2	2020	New modifications	Diterpenoids	Boswellia	Viridiplantae
C[C@@H]1C(=O)C[C@@]23COC(=O)C2=CCCC3[C@@]1(C)CCC1=CCOC1=O	2020	New modifications	Diterpenoids	Salvia	Viridiplantae
CC(C)[C@@]1(O)C(=O)C[C@]2(C)C[C@]3(O)C(=CC(=O)[C@H]3C)[C@@H](C)CC[C@H]21	2020	Site combinations	Diterpenoids	Plagiochila	Viridiplantae
CC(=O)[C@@H](C)[C@H]1C[C@]2(C=C3[C@H](O)CC4[C@@]5(C)CC[C@H](O[C@@H]6OC[C@H](O)[C@H](O)[C@H]6O[C@@H]6O[C@H](CO)[C@@H](O)[C@H](O)[C@H]6O)C(C)(C)C5CC[C@@]4(C)[C@]3(C)CC2)C(=O)O1	2020	New modifications	Triterpenoids	Ilex	Viridiplantae
C=C1C[C@@]23CC[C@H]4[C@@](C)(CCC(=O)[C@@]4(C)CO)[C@@H]2CC[C@@H]1C3	2020	New sites	Diterpenoids	Euphorbia	Viridiplantae
CO[C@H]1OC(=O)C=C1CC[C@@]1(C)C2=CCC[C@@](C)(CCC=C(C)C)[C@@H]2CC[C@H]1C	2020	Site combinations	Sesterterpenoids	Dactylospongia	Metazoa
C=C(C)[C@@H]1CC[C@]2(C(=O)OC)CC[C@]3(O)[C@H](CC(=O)[C@@H]4[C@@]5(C)CC[C@@H](OC(C)=O)C(C)(C)[C@@H]5CC[C@]43C)[C@@H]12	2020	New sites	Triterpenoids	Peganum	Viridiplantae
CC1=CCC[C@@]2(C)O[C@H]2[C@H]2OC(=O)[C@@H](C)[C@H]2C[C@@H]1O[C@@H]1O[C@H](CO)[C@@H](O)[C@H](O)[C@H]1O	2020	New modifications	Sesquiterpenoids	Anvillea	Viridiplantae
CC(C)[C@@H]1CC[C@]2(C)[C@H]1[C@H]1O[C@@H]2CC[C@]1(O)CO	2020	New modifications	Sesquiterpenoids	Echinacea	Viridiplantae
C[C@H]1CC[C@@]2(OC1)OC1C[C@H]3[C@@H]4CCC5=CC(=O)C=C[C@]5(C)[C@H]4CC[C@]3(C)[C@@]1(O)[C@@H]2C	2020	New modifications	Steroids	Dracaena	Metazoa
CO[C@@H]1/C=C(\C)C[C@H](O)[C@]2(O)[C@H](CC2(C)C)C(CO)C1	2020	New modifications	Sesquiterpenoids	Pestalotiopsis	Fungi
COC(=O)[C@@H](CC(=O)[C@@H]1[C@H]2CCC(C)(C)c3ccc4c(c32)[C@@]2(O[C@H]1c1cc(O)c(O)cc12)C(=O)C(C(C)C)=C4)Cc1ccc(O)c(O)c1	2020	New skeletons	others	Salvia	Viridiplantae
CC1=C[C@H](OC2O[C@H](CO)[C@@H](O)[C@H](O)[C@H]2O)[C@@H](O)[C@]2(C)C3[C@@H](O)[C@H](O)[C@@]4(CO)OC[C@@]35[C@@H](C[C@@H]12)OC(=O)[C@H](O)[C@@]45O	2020	New modifications	Triterpenoids	Brucea	Viridiplantae
C=C1CC[C@@H]2C(C)=CC(=O)C[C@@]2(O)C1	2020	New sites	Sesquiterpenoids	Curcuma	Viridiplantae
[CH][C@@]1(C)C2[C@@H](O)C[C@]3(C)C(CC=C4C5C[C@](C)(CO)CC[C@]5(C(=O)O[C@H]5OC(CO)[C@@H](O)C(O)[C@H]5O)CC[C@]43C)[C@@]2(C)C[C@H](O)[C@H]1O	2020	New sites	Triterpenoids	Solanum	Viridiplantae
COC(=O)[C@@H](CC(=O)[C@H]1[C@@H]2CCC(C)c3ccc4c(c32)[C@]2(O[C@@H]1c1cc(O)c(O)cc12)C(=O)C(C(C)C)=C4)Cc1ccc(O)c(O)c1	2020	New skeletons	others	Salvia	Viridiplantae
C[C@H]1[C@H](C)CC(O)[C@]2(C)CC[C@]3(C)C(=C(O)C(=O)[C@@H]4[C@@]5(C)CC[C@H](O)[C@@](C)(C(=O)O)[C@@H]5CC[C@]43C)[C@H]12	2020	New sites	Triterpenoids	Ganoderma	Fungi
C=C1CC[C@]2(CC(=O)O)CC[C@]3(C)C(=CCC4[C@@]5(C)CC[C@H](O[C@@H]6OC[C@H](O)[C@H](OC[C@@H]7O[C@H](CO)[C@@H](O)[C@H](O)[C@H]7O)[C@H]6O)C(C)(C)C5CC[C@]43C)C2[C@]1(C)O	2020	New skeletons	Monoterpenoids	Ajuga	Viridiplantae
CC(C)[C@@H]1CC[C@@H](C(=O)O)c2c(O)cc(C(=O)O)cc21	2020	New modifications	Sesquiterpenoids	Undefined	Others
CC(=O)O[C@@H](C[C@H](O)[C@@](C)(O)CCC=C(C)C)/C(C)=C/CO[C@@H]([C@@H](O)[C@H](CO)OCC=C(C)C)[C@H](O)CO	2020	New modifications	Sesquiterpenoids	Fusarium	Fungi
C=C1CC[C@@H]2[C@@](C)(CC[C@@H](O)[C@@]2(C)CO)[C@@H]1C[C@H]1[C@H]2C(=O)OC[C@H]2O[C@]12C=C(/C=C\[C@@H]1C(=C)CC[C@@H]3[C@](C)(CO)[C@H](O)CC[C@]31C)C(=O)O2	2020	New sites	Diterpenoids	Andrographis	Viridiplantae
C=C[C@]1(C)C=C2C(=O)[C@H]3OC(=O)[C@@]4(CCCC(C)(C)[C@H]34)[C@@]2(O)CC1	2020	New modifications	Diterpenoids	Undefined	Others
COC[C@]1(C[C@H]2C(=O)[C@@]34[C@H]5O[C@@H]6O[C@]7(CCCC(C)(C)[C@H]7[C@H](O)[C@H]63)[C@@H]4CC[C@H]52)[C@H]2C[C@H](OC(C)=O)[C@@H]3[C@H]2O[C@@H]2O[C@@]1(O)[C@@H](O)[C@@H]1C(C)(C)CCC[C@]231	2020	New skeletons	Diterpenoids	Isodon	Viridiplantae
CC(=O)OCC(C)CCCC(C)C1=C2CC3=C(CC[C@H](O)C3=O)O[C@@]2(C)C[C@H]1O	2020	New modifications	Meroterpenoids	Undefined	Others
CC(=O)O[C@@H]1C[C@@H](O)[C@@]23CO[C@@H](O)[C@]1(C)[C@@H]2C[C@H](O)[C@@]1(C)[C@H]3C(=O)[C@H](OC(C)=O)[C@@]2(C)[C@H](c3ccoc3)C[C@H]3O[C@@]312	2020	New modifications	Triterpenoids	Toona	Viridiplantae
CCOCC1=C\[C@@H]2OC(=O)[C@H](C)[C@@]2(O)[C@@H](OC(C)=O)[C@H]2C3(CC[C@H](OC(C)=O)[C@]2(C)[C@@H](OC(C)=O)\C=C/1)CO3	2020	New modifications	Diterpenoids	Ellisella	Metazoa
COC(=O)[C@H]1COC(=O)[C@H]2[C@@H]1[C@H](O)C[C@]2(C)OC(C)=O	2020	New modifications	Monoterpenoids	Morinda	Viridiplantae
C=C1CC[C@H]2[C@](C)(CCC=C(C)C)[C@H](O)CC[C@]2(C)[C@@H]1C[C@]1(C(=O)OC)OC(C)=C(C)C1=O	2020	Site combinations	Meroterpenoids	Colletotrichum	Fungi
CC[C@@H](C)CO[C@@H](O)[C@@H](O)C(O)(O)[C@H](CO)O[C@@H]1CO[C@@H](OCCC(C)C)[C@H](O)[C@H]1C	2020	New skeletons	Monoterpenoids	Streblus	Viridiplantae
CC1(C)CC[C@]2(C(=O)O)CC[C@]3(C)C(=CC[C@@H]4[C@@]5(C)C[C@@H](O)[C@H](O)[C@](C)(CO)[C@@H]5[C@H](O)C[C@]43C)[C@@H]2[C@@H]1O	2020	New modifications	Triterpenoids	Combretum	Viridiplantae
C=C1C(=O)OC2[C@H]1CC[C@@](C)(O)[C@]13O[C@H]1C(Cl)[C@](C)(O)[C@H]23	2020	New modifications	Sesquiterpenoids	Artemisia	Viridiplantae
CC1=C[C@@H]2O[C@@H]3[C@H](O)C[C@@](C)([C@]34CO4)[C@@]2(CO)[C@H](O)C1=O	2020	New modifications	Sesquiterpenoids	Fusarium	Fungi
C=C(CO)[C@H]1CC[C@H](C)[C@H]2CCC(C(=O)O)=C[C@H]12	2020	New sites	Sesquiterpenoids	Myristica	Viridiplantae
Cc1cc2c(o1)C(=O)c1cc3c(cc1C2=O)C(C)(C)[C@@H](O)CC3	2020	New skeletons	others	Caryopteris	Viridiplantae
C=C1CC[C@@H]2C(C)(C)C(=O)CC[C@@]2(C)[C@@H]1CC/C(C)=C/C=O	2020	New modifications	Diterpenoids	Euphorbia	Viridiplantae
C[C@@]12CCC[C@@](C)(CO)[C@H]1CCC1=C[C@@](C)([C@@H](O)CO)CC[C@H]12	2020	New modifications	Diterpenoids	Sigesbeckia	Viridiplantae
C=C(C)[C@@H](O)CC[C@](C)(O)[C@H]1CC[C@]2(C)[C@@H]1[C@H](O[C@@H]1O[C@H](C)[C@@H](O)[C@H](O)[C@H]1O)C[C@@H]1[C@@](C)(CCC(=O)O)[C@H](C(=C)C)CC[C@]12C	2020	New modifications	Triterpenoids	Cyclocarya	Viridiplantae
CCCCCCCCCCCCCCC(=O)OCc1cc(OC)c(C/C=C(/CC(C)C=C(C)C)OC(=O)CCCCCCCCCCCCCC)c(O)c1C=O	2020	New skeletons	Meroterpenoids	Hericium	Fungi
C=C(C)C1CC[C@]2(C)C[C@@H](O)[C@]3(C)C(CCC4[C@@]5(C)CC[C@@H](OC(=O)CCCCCCCCCCCCCCCCCCC)C(C)(C)C5CC[C@]43C)C12	2020	New modifications	Triterpenoids	Globimetula	Viridiplantae
CC(=O)OCC1=C[C@@H]2OC(=O)C3=CO[C@@H](O[C@@H]4O[C@H](CO)[C@@H](O)[C@H](O)[C@H]4O)[C@H]1[C@@H]32	2020	New modifications	Monoterpenoids	Orobanche	Viridiplantae
C/C1=C\CC(C)(C)/C=C/C(=O)/C(CO)=C/[C@@H](O)C1	2020	New modifications	Sesquiterpenoids	Leptogorgia	Metazoa
COC(=O)[C@]1(C)[C@H](O)CC[C@]2(C)[C@H]3CC[C@@]4(C)[C@H]5[C@H](C[C@]4(C)C3=CC[C@@H]12)OC(=O)[C@@H]5CCC=C(C)C	2020	New modifications	Triterpenoids	Lantana	Viridiplantae
COC(=O)C1=CCCC2=C1[C@@H](O)C[C@@H](C)[C@]21C[C@@H](c2ccoc2)OC1=O	2020	New modifications	Diterpenoids	Croton	Viridiplantae
C/C1=C\C[C@]2(C(C)C)CC[C@@](C)(O2)[C@@H](O)C[C@H](O)/C(C)=C/C[C@@H]1O	2020	Site combinations	Diterpenoids	Boswellia	Viridiplantae
CC1=C2C3=CCC4[C@@]5(C)C[C@@H](O)[C@@H](O)C(C)(C)C5CC[C@@]4(C)[C@]3(C)CC[C@@]2(C(=O)O)CC[C@]1(C)O	2020	New sites	Triterpenoids	Rosa	Viridiplantae
COC(=O)c1cc(CCO)c(C)c2c1CC(C)(C)C2	2020	New skeletons	Sesquiterpenoids	Phellinus	Fungi
CCO[C@]1(C)CCC(C(C)(C)O)=C[C@H]2[C@H]1CC[C@@]2(C)O	2020	New modifications	Sesquiterpenoids	Curcuma	Viridiplantae
COC(=O)C1=C[C@@H]2OC(=O)[C@H](C)[C@]23O[C@@]1(O)C[C@H](OC(C)=O)[C@@]1(C)[C@@H](OC(C)=O)CC=C(C)[C@@H]1[C@@H]3OC(C)=O	2020	New modifications	Diterpenoids	Briareum	Metazoa
CCCCCC[C@@H](O)C(=O)O[C@@H]1[C@@H]2[C@H](CC1(C)C)[C@H](O)[C@@]1([C@H](O)C(=O)OC)OCC(=O)[C@@]21C	2020	New skeletons	Sesquiterpenoids	Cerrena	Fungi
COC(=O)[C@@H]1C[C@H](OC(=O)CC(C)C)[C@]23CO[C@H](OC(C)=O)[C@H]2[C@](C)([C@@]24O[C@@]2(C)C2CC4O[C@@H]4O[C@H](OC)C[C@]24O)[C@H](O)C2OC[C@@]1(C(=O)OC)[C@H]23	2020	New skeletons	Diterpenoids	Azadirachta	Viridiplantae
C=C(C)[C@@H]1CC2=C(C)C(=O)O[C@H]2C[C@@]1(C)/C=C/OC	2020	New modifications	Sesquiterpenoids	Valeriana	Viridiplantae
C[C@]1(CCO)C[CH][C@H]2C(=CC[C@H]3[C@](C)(O)CCC[C@]23C)C1	2020	New skeletons	Diterpenoids	Xylaria	Fungi
CO[C@H]1C[C@]2(CC[C@@]3(O2)[C@H](C)C(=O)[C@@H](O)[C@H]2C(C)(C)[C@H](O)CC[C@@]23C)CO1	2020	New modifications	Diterpenoids	Rydingia	Viridiplantae
C[C@@H]1[C@@H](O)C[C@@H]2[C@@H]([C@@H]1O)[C@H]1C[C@@H]3C=CC(=O)C[C@H]3C[C@H]1C2(C)C	2020	New skeletons	others	Aspergillus	Fungi
C=C(C)[C@]1(O)C[C@H](C)[C@]2(O)[C@@H]3C=C(C)C(=O)[C@@]3(O)[C@@H](O)[C@@]3(CO)O[C@@H]3[C@H]2[C@@H]1O	2020	New modifications	Diterpenoids	Excoecaria	Viridiplantae
CC1(C)CC[C@]2(C(=O)O[S])CC[C@]3(C)C(=CC=C4[C@@]5(C)C[C@@H](O)[C@H](O)[C@@](C)(CO)C5[C@H](O)C[C@]43C)C2C1	2020	New sites	Triterpenoids	Centella	Viridiplantae
C[C@H]1CC[C@]2(C(=O)O)CC[C@]3(C)C(=CC[C@@H]4[C@@]5(C)C[CH][C@@H](O)C(C)(C)[C@@H]5CC[C@]43C)[C@@H]2[C@@H]1C	2020	New modifications	Triterpenoids	Rhododendron	Viridiplantae
C[C@H](O)c1cncc2c1C[C@@H]1N[C@H]2Cc2c1[nH]c1ccccc21	2020	New sites	Others	Rauvolfia	Viridiplantae
C=C1CC[C@H](C(C)(C)OC(C)=O)CC2[C@@H]1CC[C@@]2(C)O	2020	New modifications	Sesquiterpenoids	Commiphora	Viridiplantae
CC(C)c1cc2c(cc1O)[C@@]1(C)CCC[C@](C)(CO)[C@@H]1CC2=O	2020	New modifications	Diterpenoids	Selaginella	Viridiplantae
C/C=C/C(=O)O[C@H]1[C@H]2[C@@H]([C@@H](OC(C)=O)[C@@H](C)C(=O)[C@@]34C[C@@H](C)[C@H](OC(C)=O)[C@]3(/C=C(\C)[C@H]1OC(C)=O)O4)C2(C)C	2020	New modifications	Diterpenoids	Euphorbia	Viridiplantae
CC(=O)Oc1c(C(C)C)cc2c(c1OC(C)=O)[C@@]1(C(=O)O)CCCC(C)(C)[C@@H]1CC2	2020	New sites	Diterpenoids	Ekebergia	Viridiplantae
CC(C)CC(=O)OCC1=CO[C@@H](OC(=O)CC(C)C)[C@H]2[C@]1(O)C[C@H](OC(=O)CC(C)C)[C@]2(O)COC(=O)CC(C)C	2020	New modifications	Monoterpenoids	Patrinia	Viridiplantae
C=C1CC[C@@H](O)[C@]2(C)C[C@]3(OC)CC(=O)C(C)=C3C[C@@H]12	2020	New skeletons	Sesquiterpenoids	Neolitsea	Viridiplantae
C=C(C)[C@@]12OC3(/C=C/C=C/CCCCC)O[C@H]1[C@@H]1[C@H]4OC4(CO)[C@H](O)[C@]4(O)C(=O)C(C)=C[C@H]4[C@@]1(O3)[C@@H](C)[C@@H]2OC(C)=O	2020	New modifications	Diterpenoids	Daphne	Viridiplantae
CC(C)=CCC/C(C)=C/CC[C@]1(C)Oc2cc(C)cc(O)c2C[C@@H]1O	2020	New modifications	Meroterpenoids	Rhododendron	Viridiplantae
C/C=C\C(=O)O[C@@H]1C[C@@H]2O[C@@H]3C=C(C)CC4OC[C@@]2(O)[C@@]1(C)[C@@]43C	2020	New modifications	Sesquiterpenoids	Trichothecium	Fungi
C=C(C=O)CC[C@@H]1C(=C)CC[C@H]2[C@](C)(O)CCC[C@]12C	2020	New skeletons	Diterpenoids	Hesperocyparis	Viridiplantae
CC(C)(O)[C@@H]1CC[C@H]([C@H]2CC[C@@]3(C)C4=C(CC[C@]23C)[C@@]2(C)CC[C@H](O)C(C)(C)[C@@H]2CC4=O)[C@H]1O	2020	Site combinations	Triterpenoids	Inonotus	Fungi
C=C(C)C1CC[C@]2(C)CC[C@]3(C)C(CCC4[C@@]5(C)CC[C@@H](OC(=O)CCCCCCCCCCCCCCCCCCC)C(C)(C)C5C[C@H](O)[C@]43C)C12	2020	New modifications	Triterpenoids	Globimetula	Viridiplantae
COC(=O)[C@@H]1C[C@]23CC[C@@]14Nc1c(OC)cccc1[C@@]41CCN(C(=O)C2)[C@@H]31	2020	New skeletons	Meroterpenoids	Kopsia	Viridiplantae
C[C@@]12[C@H](OC3OC(CO)C(O)C(O)C3O)C[C@@H](O[C@@H]3C=C(CO)CC[C@@]31C)[C@@]21CO1	2020	New modifications	Sesquiterpenoids	Trichoderma	Fungi
COc1cc2c(cc1O)-c1cc(C)ccc1C(C)(/C=C/C=C(C)C)O2	2020	New skeletons	Meroterpenoids	Trichothecium	Fungi
C=C1O[C@@H]2[C@H](C)[C@]3(O)[C@H]1O[C@]1(O)C[C@H]4[C@H](C)CC(=O)[C@@H](O)[C@]4(C)[C@@H]([C@H]2O)[C@@]13C	2020	New skeletons	Diterpenoids	Eurycoma	Viridiplantae
C=C1[C@H]2C[C@@H](O)[C@]1(C)[C@@]1(C)CCC(CO)=C[C@H]1O2	2020	Site combinations	Sesquiterpenoids	Trichoderma	Fungi
CC(=O)OC[C@]12CCCC(C)(C)[C@@H]1CC[C@@]1(C)[C@@H]3CCC4=C(C(=O)O[C@H]4C)[C@@]3(C)[C@@H](OC(C)=O)C[C@@H]12	2020	New modifications	Sesterterpenoids	Lendenfeldia	Metazoa
COC(=O)[C@@H]1O[C@@H](O)C(=O)[C@]2([C@H](O)/C=C(\C)[C@@H]3OC(C)(C)[C@H]4CCC(C)=C[C@H]43)O[C@H]12	2020	New skeletons	Meroterpenoids	Trichothecium	Fungi
C[C@@H]1O[C@@H](O[C@@H]2[C@@H](C(=O)O)O[C@@H](O[C@H]3CC[C@@]4(C)C(CC[C@]5(C)C4CC=C4[C@@H]6CC(C)(C)CC[C@]6(C(=O)O)CC[C@]45C)[C@]3(C)C=O)[C@@H]2O[C@@H]2O[C@H](CO)[C@H](O)[C@H](O)[C@H]2O)[C@H](O)[C@H](O)[C@H]1O	2020	New sites	Triterpenoids	Momordica	Viridiplantae
C=C(C(=O)OC)[C@@H]1[C@@H](OC(=O)CC(C)C)C[C@]2(C)[C@H](C(C)=CC[C@H]2O)[C@H]1O	2020	New modifications	Sesquiterpenoids	Artemisia	Viridiplantae
CC(=O)OC/C(C)=C/CC/C(C)=C/CC[C@]1(C)C=Cc2c(O)cc(C)cc2O1	2020	New sites	Meroterpenoids	Rhododendron	Viridiplantae
CC[C@H](CC[C@@H](C)[C@H]1CCC2C3C[C@@H](O)C4=CC(=O)CC[C@]4(C)C3CC[C@@]21C)C(C)C	2020	New modifications	Steroids	Boophone	Viridiplantae
CC(C)[C@@H]1CC(=O)c2coc3c2[C@H]1C[C@@H](C)C3=O	2020	New modifications	Sesquiterpenoids	Talipariti	Viridiplantae
C[C@@]12CO[C@]3(C1)c1coc(=O)cc1O[C@H](CO)[C@H]3C2	2020	New skeletons	Others	Conocybe	Fungi
C/C1=C\C[C@]2(C)C(=O)[C@H](O)[C@@H]([C@H](C)CO)[C@H]2C/C=C(\C)[C@@H](O)CC/C(C)=C/CC1	2020	New modifications	Sesterterpenoids	Aplosporella	Fungi
C=C1CO[C@@H]2C(C)=C3C[C@@H](O)[C@H](C)[C@@H]3C[C@H]1[C@H]2O	2020	New modifications	Sesquiterpenoids	Daphne	Viridiplantae
CC1=C[C@H](O)[C@@H](O)[C@@]2(C)[C@H]1C[C@H]1OC(=O)[C@H](O)[C@@]3(O)[C@@]4(CO4)[C@@H](O)[C@]4(O)OC[C@]13[C@@H]24	2020	New modifications	Triterpenoids	Eurycoma	Viridiplantae
C/C1=C\[C@@H](O)CC(CO)[C@H]2CC(C)(C)[C@]2(O)[C@@H](O)C1	2020	New modifications	Sesquiterpenoids	Pestalotiopsis	Fungi
C=C[C@]1(C)CCC2=C(CC[C@]3(O)[C@@](C)(C(=O)O)CCC[C@]23C)[C@H]1O	2020	Site combinations	Diterpenoids	Talaromyces	Fungi
C/C=C(/C)C(=O)O[C@@H]1C(COC(C)=O)=C[C@@H]2C(=O)[C@]3(C=C(C)[C@H](O)[C@@]13O)[C@H](C)C[C@@H]1[C@H]2[C@]1(C)CO	2020	New modifications	Diterpenoids	Euphorbia	Viridiplantae
CO[C@@H]1C[C@]2(CC[C@@]3(O2)[C@H](C)C(=O)C[C@H]2C(C)(C)[C@H](O)CC[C@@]23C)CO1	2020	New modifications	Diterpenoids	Rydingia	Viridiplantae
C=C(C)[C@@H]1CC[C@]23O[C@H]2[C@H](C/C(C)=C\c2cc(C(=O)OC)c(o2)C1)OC3=O	2020	New modifications	Diterpenoids	Leptogorgia	Metazoa
C=C(C)[C@@H]1CCC2=C[C@H](C[C@@](C)(O)[C@H](OC(C)=O)c3cc(C=O)c(o3)C1)OC2=O	2020	New modifications	Diterpenoids	Leptogorgia	Metazoa
CC(=O)O[C@]1(C)C[C@@]2(O)C[C@@H](O)[C@@]3(O)[C@@H](C[C@H](O)C3(C)C)/C(C)=C3/CC[C@@H]1[C@H]32	2020	New modifications	Diterpenoids	Rhododendron	Viridiplantae
COC(=O)[C@@]12[C@](C)(O)C(=O)[C@]1(C)C(C)=C[C@@H]1[C@]2(C)C[C@@H]2OC(=O)[C@]13CC[C@H](OC(C)=O)C(C)(C)[C@@H]23	2020	New skeletons	others	Penicillium	Fungi
CO[C@H]1[C@H]2[C@@H]([C@H](OC(C)=O)[C@@H](C)C(=O)[C@@]34C[C@H](C)[C@H](OC(C)=O)[C@]3(/C=C(\C)[C@H]1O)O4)C2(C)C	2020	New modifications	Diterpenoids	Euphorbia	Viridiplantae
CC(=O)O[C@@H](CC1=C(O)C(=O)OC1)[C@]1(C)[C@H]2CCC=C(C)[C@]2(C)[C@@H](OC(=O)c2cccnc2)[C@H](O)[C@]1(C)O	2020	New modifications	Diterpenoids	Scutellaria	Viridiplantae
CCCCCC=CCC=[C]CCCCCCCC(=O)OC[C@@]1(O)C[C@@]23CC[C@@H]4C5=CC(=O)N[C@]56O[C@@H]6[C@@H](O)[C@@]4(C)[C@@H]2CC[C@@H]1C3	2020	New modifications	Diterpenoids	Coffea	Viridiplantae
CC1(C)CC[C@]2(C(=O)O)CC[C@]3(C)C(=CCC4[C@@]5(C)C[C@@H](O)[C@H](OC(=O)c6cc(O)c(O)c(O)c6)[C@@](C)(C(=O)O)C5CC[C@]43C)[C@@H]2[C@@H]1O	2020	New sites	Triterpenoids	Quercus	Viridiplantae
C/C1=C\C(=O)C/C(C)=C/CC(=O)/C(C)=C/[C@H]2[C@@H](CC1)C2(C)C	2020	New modifications	Diterpenoids	Oryza	Viridiplantae
C=C(C(=O)OC)[C@@H]1C[C@H](O)[C@@H]2[C@]3(C1)C(=O)OC[C@]21[C@@H](OC(C)=O)CCC(C)(C)[C@H]1[C@H]3O	2020	New modifications	Diterpenoids	Isodon	Viridiplantae
C=C(CC[C@](C)(O)[C@H]1CCC2[C@@H]3C[C@@H](O)C4=CC(=O)CC[C@]4(C)[C@H]3CC[C@@]21C)C(C)C	2020	New modifications	Steroids	Entandrophragma	Viridiplantae
CC(=O)O[C@H]1[C@@H]2C(C)(C)CCC[C@]23CO[C@@]1(O)[C@@]12C[C@@H](CC[C@H]13)[C@@]1(CO1)[C@@H]2OC(C)=O	2020	New sites	Diterpenoids	Isodon	Viridiplantae
CC(=O)O[C@@H]1C[C@H]2C(C)(C)C(=O)C=C[C@]2(C)[C@H]2C(=O)C[C@@]3(C)[C@H](c4ccoc4)C[C@H]4O[C@]43[C@]12C	2020	Site combinations	Triterpenoids	Toona	Viridiplantae
COC(=O)C1(O)CCO[C@H]1O[C@H]1[C@H](OC(=O)[C@@]2(C)CCC[C@]3(C)C(CCc4ccoc4)=C(C)CC[C@@H]23)O[C@H](CO)[C@@H](O)[C@@H]1O	2020	New modifications	Diterpenoids	Phlomoides	Viridiplantae
C/C=C1/[C@H](O[C@@H]2O[C@H](CO)[C@@H](O)[C@H](O)[C@H]2O)OC=C(C(=O)O)[C@H]1CC(=O)OCCc1ccc(OC)c(OC)c1	2020	New modifications	Monoterpenoids	Fraxinus	Viridiplantae
C[C@@H]1[C@@]2(C[C@H](O)[C@@H](C)[C@H](O)O2)OC2C[C@H]3C4CCC5=CC(=O)C=C[C@]5(C)C4CC[C@]3(C)[C@]21O	2020	New modifications	Steroids	Dracaena	Metazoa
C=C[C@]1(C)CC2CCC3[C@@](C)(CC[C@H](OC(C)=O)[C@@]3(C)CO)C2[C@H](OC(C)=O)C1	2020	Site combinations	Diterpenoids	Phalaris	Viridiplantae
CCCCCC[C@@H](O)C(=O)O[C@@H]1[C@@H]2[C@H](CC1(C)C)[C@H](O)[C@@]13O[C@@H]1[C@H](O)[C@@]1(CO1)[C@@]23C	2020	New modifications	Sesquiterpenoids	Cerrena	Fungi
CO[C@@H]1C=C2C(=C[C@H]3C([C@@H]2C)[C@H](O)[C@H](OC(=O)c2ccccc2)[C@@]2(O)C(C)(C)CCC[C@]32C)O1	2020	New modifications	Diterpenoids	Caesalpinia	Viridiplantae
CC1O[C@@H](O[C@H]2C(O)[C@@H](O)CO[C@H]2O[C@H]2CC[C@@]3(C)C(CC[C@]4(C)C3CC=C3[C@@H]5CC(C)(C)CC[C@]5(C(=O)O[C@@H]5OC(CO[C@@H]6OC(CO)[C@@H](O)C(O)[C@@H]6O)[C@@H](O)C(O)[C@@H]5O)CC[C@]34C)[C@]2(C)CO)C(O)[C@@H](O[C@@H]2OC[C@@H](O)C(O[C@@H]3OC(C)[C@H](OC4OC(CO)C(OC5OC(CO)C(O)[C@H](O)[C@@H]5O)[C@@H](O[C@@H]5OC(C)C(O)[C@H](O)[C@@H]5O)[C@@H]4O)[C@H](O)C3O)[C@@H]2O)C1O	2020	New modifications	Triterpenoids	Scabiosa	Viridiplantae
CC1=CC(=O)[C@]2(C1=O)[C@H](C)CC[C@@H]2[C@H](C)CO	2020	New sites	Others	Rhodotus	Fungi
C[C@@H]1CC[C@@H](O)C/C(CO)=C2/C[C@@](C)(CO)C[C@@H]21	2020	New skeletons	Sesquiterpenoids	Conocybe	Fungi
C[C@@H]1C(=O)C[C@@H](O)[C@]2(C)CC[C@@H]([C@@](C)(O)CO)C[C@@H]12	2020	New modifications	Sesquiterpenoids	Datura	Viridiplantae
C=C1[C@H]2C[C@@H](OC(C)=O)[C@]1(C)[C@@]1(C)CCC(C)=C[C@H]1O2	2020	New modifications	Sesquiterpenoids	Trichoderma	Fungi
CC(=O)OC/C(C)=C\CC/C(C)=C/CC[C@@]1(C)C=Cc2c(O)cc(C)cc2O1	2020	New sites	Meroterpenoids	Rhododendron	Viridiplantae
CC(=O)O[C@@H]1[C@](C)(O)[C@H](O)[C@@H]2C(=O)[C@]3(C=C(C)[C@H](O)[C@@]13O)[C@H](C)C[C@@H]1[C@H]2C1(C)C	2020	Site combinations	Diterpenoids	Euphorbia	Viridiplantae
CO[C@H]1c2cc(C(C)C)c(O)c(O)c2[C@@]23CC[C@H](OC(C)=O)C(C)(C)C2[C@@H]1OC3=O	2020	New sites	Diterpenoids	Salvia	Viridiplantae
CC(=O)OC/C1=C/[C@H](OC(C)=O)[C@@H]2C[C@H](O)C(C)=C([C@@H](OC(C)=O)/C(OC(C)=O)=C(/C)[C@@H](OC(C)=O)C[C@@H]1OC(=O)c1ccccc1)C2(C)C	2020	New modifications	Diterpenoids	Taxus	Viridiplantae
COC(=O)[C@@H](O)/C=C/[C@H]1[C@H](C)C[C@H](O)CC1(C)C	2020	New modifications	Others	Valeriana	Viridiplantae
CO[C@]12O[C@]3(O)C(=O)C4=C(O)C(=O)[C@@H]5[C@@H](C5(C)C)[C@]4(C)[C@H](C)[C@@H]3[C@H]1[C@@H](C)[C@]1(C)C(=C(O)C(=O)[C@@H]3[C@H]1C3(C)C)C2=O	2020	New modifications	Sesquiterpenoids	Neonothopanus	Fungi
C=C(CCC=C(C)C)C1CC=C(C(=O)O)CC1	2020	New modifications	Sesquiterpenoids	Zea	Viridiplantae
C/C=C(/C)C(=O)O[C@H]1CC[C@]2(C)C[C@](OC(C)=O)(C(=O)O)C[C@H]2[C@]1(C)O	2020	New skeletons	Sesquiterpenoids	Dobinea	Viridiplantae
C/C(=C\CCC(C)[C@@H]1CC[C@@]2(C)[C@@H]3C(=O)C=C4[C@@H](CC[C@H](O[C@@H]5O[C@H](CO)[C@@H](O)[C@H](O)[C@H]5O)C4(C)C)[C@]3(C)C(=O)C[C@]12C)CO	2020	Site combinations	Triterpenoids	Hemsleya	Viridiplantae
C=C(C)[C@@H]1CC[C@]2(CC(=O)O)CC[C@]3(CO)[C@H](CC[C@@H]4[C@@]5(C)CC[C@H](OC(C)=O)C(C)(C)[C@@H]5CC[C@]43C)[C@@H]12	2020	New sites	Triterpenoids	Peganum	Viridiplantae
CC1=C[C@@H]2[C@@H]3C[C@H]1O[C@@]3(C)CC[C@H]2C(C)(O)CO	2020	Site combinations	Sesquiterpenoids	Undefined	Others
C=C1C[C@@]23CC[C@@H]4[C@](C)(C(=O)O)[C@@H](OC(=O)/C(C)=C/C)CC[C@@]4(C)[C@@H]2CC[C@H]1C3	2020	New modifications	Diterpenoids	Mikania	Viridiplantae
CCC(C)C(=O)C1=C(O)C(C)(C)C(=O)C2=C1O[C@@]1(C)CC[C@H](O)C(C)(C)[C@@H]1C2	2020	New skeletons	Others	Hypericum	Viridiplantae
CC(C)=CCC/C(C)=C/CCC1=C[C@]2(OC1=O)c1cc(O)ccc1O[C@H](O)[C@]21C=C2c3cc(O)ccc3O[C@@](C)(CCC=C(C)C)[C@@H]2CC1	2020	New skeletons	others	Ganoderma	Fungi
C[C@@H]1[C@@H]2[C@H]3[C@@H](C)[C@]4(C)C(=C(O)C(=O)[C@@H]5[C@H]4C5(C)C)C(=O)[C@@]3(O)O[C@]2(O)C(=O)C2=C(O)C(=O)[C@@H]3[C@@H](C3(C)C)[C@@]21C	2020	New modifications	Sesquiterpenoids	Neonothopanus	Fungi
C=C1C[C@@]23CC[C@H]4[C@@](C)(CCC[C@@]4(C)C(=O)O)[C@@H]2CC[C@@H]1C3	2020	New modifications	Diterpenoids	Helianthus	Viridiplantae
CC1=C2C3=C(CC[C@]2(C)[C@@H]([C@@H]2CC[C@](CO)(C(C)C)OC2)C1)[C@@]1(C)CC[C@@H](O)C(C)(C)[C@@H]1CC3	2020	New modifications	Triterpenoids	Taiwanofungus	Fungi
C=C1[C@H](OC(=O)C=C(C)C)[C@]23CC[C@H]4[C@@](C)(CCC[C@@]4(C)C(=O)O)[C@@H]2CC[C@@H]1C3	2020	Site combinations	Diterpenoids	Baccharis	Viridiplantae
C[C@@H]1CC(=O)[C@H]2C[C@H]3[C@]4(C)CC[C@@H]4[C@@](C)(O)CC[C@]31C2(C)C	2020	Site combinations	Diterpenoids	Trichoderma	Fungi
C=C(C)C(=C)/C=C1/CC[C@H]2C(C)(C)[C@@H](O)CC[C@]2(C)C1=C	2020	New sites	Diterpenoids	Nacna	Metazoa
C=C1C(=O)O[C@@H]2[C@@H]3C(=C(C)C[C@H](OC(=O)/C(C)=C\C)[C@@H]12)C[C@H](O)[C@]3(C)O	2020	New modifications	Sesquiterpenoids	Artemisia	Viridiplantae
C=C1CC[C@@H]2[C@](C)(CO)[C@@H](O)CC[C@@]2(C)[C@H]1/C=C/C(=C/C(=O)OC)C(=O)O	2020	New modifications	Diterpenoids	Andrographis	Viridiplantae
CC(=O)C1=C[C@]2(O)[C@@H](C)CC[C@H](O)[C@]2(C)CC1	2020	Site combinations	Sesquiterpenoids	Populus	Viridiplantae
CC(C)(O)[C@@H](O)CC[C@@](C)(O)[C@H]1[C@@H](O)C[C@@]2(C)[C@@H]3C[C@H](O)[C@H]4C(C)(C)[C@@H](O[C@@H]5OC[C@@H](O)[C@H](O)[C@H]5O[C@@H]5O[C@H](CO)[C@@H](O)[C@H](O)[C@H]5O)CC[C@@]45C[C@@]35CC[C@]12C	2020	New modifications	Triterpenoids	Astragalus	Viridiplantae
C=C1CC[C@H]2C(C)(C)[C@@H](O)CC[C@]2(C)[C@H]1CC(=O)[C@]1(O)C=C(CSC[C@H](O)C(=O)OC)C(=O)C1	2020	New skeletons	Others	Alternaria	Fungi
CC1=C(C)[C@H](C[C@@H](C)[C@H]2CC[C@@]3(C)C4=C(CC[C@]23C)[C@@]2(C)CC[C@H](O)C(C)(C)[C@@H]2CC4)OC1=O	2020	New modifications	Triterpenoids	Heritiera	Viridiplantae
CC1(C)C[C@H]2C3=CC[C@@H]4[C@@]5(C)C[C@@H](O)[C@H](OC(=O)CO)C(C)(C)[C@@H]5CC[C@@]4(C)[C@]3(C)CC[C@@]2(C(=O)O)CC1O[C@@H]1O[C@H](CO)[C@@H](O)C(O)[C@H]1OC(=O)CO	2020	New sites	Triterpenoids	Anchusa	Viridiplantae
C=C(C)[C@@H]1CC(=O)C(CO)=C2CC(=O)C(C)=C2C1	2020	Site combinations	Sesquiterpenoids	Wikstroemia	Viridiplantae
C=C(C(=O)OC)[C@H]1CO[C@@H]2O[C@H](CO)[C@@H](O)[C@H](O)[C@H]2O1	2020	New modifications	Monoterpenoids	Enkianthus	Viridiplantae
C[C@]1(CCO)C[CH][C@H]2C(=CC[C@H]3[C@H](O)CCC[C@]23C)C1	2020	New skeletons	Diterpenoids	Xylaria	Fungi
CCCCCCCCCCCCCCCC(=O)OC[C@@]1(O)C[C@@]23CC[C@@H]4C5=CC(=O)NC5=C[C@@H](O)[C@@]4(C)[C@@H]2CC[C@@H]1C3	2020	New modifications	Diterpenoids	Coffea	Viridiplantae
CC1(C)C[C@]2(O)C[C@](C)(O1)c1ccc(C(=O)O)cc1O2	2020	New modifications	Sesquiterpenoids	Hyrtios	Metazoa
C=C[C@@]1(C)CC[C@]2(C)C(=O)[C@@]3(CC[C@H]2C1)[C@H](O)C[C@@H](O)C3(C)C	2020	New skeletons	Triterpenoids	Euphorbia	Viridiplantae
CC1(C)O[C@@]2(C)C[C@](O)(Oc3cc(C(=O)O)ccc32)C1=O	2020	Site combinations	Sesquiterpenoids	Hyrtios	Metazoa
CO[C@@]12C[C@H]3[C@H]([C@H](C)C1=CC(=O)O2)[C@H](O)[CH][C@@]1(O)C(C)(C)[C@H](OC(=O)c2ccccc2)CC[C@]31C	2020	Site combinations	Diterpenoids	Caesalpinia	Viridiplantae
CC(C)=CC[C@@]1(C)C(=O)C(C(=O)C(C)C)=C(O)C2=C1OC(C)(C)[C@@H]1CCC(C)=C[C@H]21	2020	New skeletons	Meroterpenoids	Hypericum	Viridiplantae
CC1(C)CC2C3=CCC4[C@@]5(C)CC[C@H](O[C@@H]6O[C@H](CC(=O)O)[C@@H](O)[C@H](O[C@@H]7O[C@H](CO)[C@@H](O)[C@H](O)[C@H]7O)[C@H]6O[C@@H]6O[C@H](CO)[C@@H](O)[C@H](O)[C@H]6O)C(C)(C)C5CC[C@@]4(C)[C@]3(C)C[C@@H](O)[C@@]2(CO)[C@@H](O)C1	2020	New modifications	Triterpenoids	Impatiens	Viridiplantae
CC(C)C1=C2C[C@@H]3O[C@@H]([C@H]4C(=O)CC[C@H]4[C@H]3C)[C@@]2(C)[C@@H](O)C1	2020	New modifications	Diterpenoids	Alternaria	Fungi
CC(=O)O[C@H]1[C@@H](C)C[C@@H]2[C@H](C)CO[C@]3(C)[C@@H](OC(C)=O)C/C=C(\C)C[C@H]4O[C@@H]3[C@H]2[C@H]14	2020	New modifications	Diterpenoids	Briareum	Metazoa
C[C@@H]1[C@H]2C3=C(O)C(=O)[C@@H]4[C@@]5(C)CC[C@H](O)[C@@](C)(C(=O)O)[C@@H]5CC[C@@]4(C)[C@]3(C)CC[C@@]2(C)C(=O)C[C@H]1C	2020	New sites	Triterpenoids	Ganoderma	Fungi
CC(C)[C@@H]1C[C@H](O)[C@@](C)(O)[C@H]2CCC(CO[C@@H]3O[C@H](CO)[C@@H](O)[C@H](O)[C@H]3O)=C[C@@H]12	2020	New sites	Sesquiterpenoids	Balanophora	Viridiplantae
CC[C@H](C)C(=O)O[C@@H]1C(=O)[C@@H](OOC(C)=O)[C@]2(C)C[C@]3(O)OC14C1=CC(=O)O[C@@H](c5ccoc5)[C@]1(C)CC[C@@H]4[C@]3(C)[C@H]2[C@@H](O)C(=O)OC	2020	Site combinations	Triterpenoids	Xylocarpus	Viridiplantae
CC1O[C@@H](O[C@H]2C(O)[C@H](O)CO[C@H]2O[C@H]2CC[C@@]3(C)C(CC[C@]4(C)C3CC=C3[C@@H]5CC(C)(C)CC[C@]5(C(=O)O[C@@H]5OC(CO[C@@H]6OC(CO)[C@@H](O)C(O)[C@@H]6O)[C@@H](O)C(O)[C@@H]5O)CC[C@]34C)C2(C)C)C(O)[C@@H](O[C@@H]2OC[C@@H](O)C(O[C@@H]3OC(C)C(OC4OC(CO)C(O)[C@@H](O[C@@H]5OC(C)C(O)[C@H](O)[C@@H]5O)[C@@H]4O)[C@H](O)[C@@H]3O)[C@@H]2O)C1O	2020	New modifications	Triterpenoids	Scabiosa	Viridiplantae
C=C(C)[C@@H]1CC[C@]23O[C@H]2[C@H](C[C@](C)(O)[C@H](OC(C)=O)c2cc(C=O)c(o2)C1)OC3=O	2020	New modifications	Diterpenoids	Leptogorgia	Metazoa
C/C(=C\CC[C@@]1(C)[C@H]2c3c(O)cc(C)cc3O[C@@]3(C)CCC[C@@H]1[C@@H]23)CO	2020	New skeletons	Meroterpenoids	Rhododendron	Viridiplantae
C/C=C(/C)C(=O)O[C@H]1CC[C@]2(C)C[C@@H](C(C)=O)C[C@H]2[C@]1(C)OC(C)=O	2020	New sites	Sesquiterpenoids	Dobinea	Viridiplantae
C=C1[C@@H](O)CC[C@@]2(C)[C@H]1[C@H](O)[C@H](OC(=O)c1ccc(O)cc1)[C@]1(C)[C@@H]2[C@H](OC(=O)c2ccc(O)cc2)C[C@@H]2[C@@]3(C)CC[C@@H](C(C)(C)O)[C@@H]3CC[C@]21C	2020	New sites	Triterpenoids	Fagaropsis	Viridiplantae
Cc1ccc2c(c1CCC(=O)C(C)C)CC[C@]1(C)[C@@H]([C@H]3CC[C@@H](C(C)(C)O)[C@@H]3O)C[C@H](O)[C@@]21C	2020	New skeletons	Triterpenoids	Inonotus	Fungi
C/C1=C\CC(C)(C)/C=C/C(=O)C(CO)CC(=O)C1	2020	New modifications	Sesquiterpenoids	Leptogorgia	Metazoa
C=C1CC23CCC4C(C)(C(=O)OC5OC(CO)C(O)C(O)C5O)CCCC4(C)C2CCC1(OC1OC(CO)C(O)C(OC2OC(CO)C(O)C(O)C2O)C1OC1OC(CO)C(O)C(O)C1O)C3	2020	New modifications	Diterpenoids	Stevia	Viridiplantae
C/C(=C\CC/C(C)=C/CC/C(C)=C/CC/C(C)=C/Cc1c(O)cc(C)cc1O)CO	2020	New sites	Meroterpenoids	Rhododendron	Viridiplantae
C=C(C)[C@@H]1CC[C@]2(C)CC[C@]3(C)[C@H](CC[C@@H]4[C@@]5(C)CC(=O)O[C@H]5CC[C@]43C)[C@@H]12	2020	New skeletons	Others	Juglans	Viridiplantae
CC(=O)O[C@@H]1CC[C@]2(C)O[C@@H]2CC[C@@](C)(O)/C=C/[C@]2(C(C)C)CC[C@@]1(C)O2	2020	Site combinations	Diterpenoids	Boswellia	Viridiplantae
C=C1[C@@H]2CC[C@H]3[C@]4(C)CCCC(C)(C)[C@H]4[C@H](OC(C)=O)C(=O)[C@]3(C2)[C@@H]1OC(C)=O	2020	New sites	Diterpenoids	Isodon	Viridiplantae
CC1(C)C[C@H](O)C[C@@]2(C)OC(=O)C=C12	2020	New modifications	Others	Tisochrysis	Others
C=C(C)C1CC[C@]2(C)C[C@H]3O[C@H]4CC5C(C)(C)[C@H](OC(=O)CCCCCCCCCCCCCCCCCCCCCCC)CC[C@]5(C)C5CCC(C12)[C@]3(C)[C@@]54C	2020	New modifications	Triterpenoids	Globimetula	Viridiplantae
CCO[C@]1(C)CCC(C(C)(C)O)=C[C@H]2[C@H]1CC[C@]2(C)O	2020	New modifications	Sesquiterpenoids	Curcuma	Viridiplantae
COC(=O)C1=CO[C@@H](O[C@@H]2O[C@H](CO[C@]3(CO)OC[C@@H](O)[C@@H](O)[C@@H]3O)[C@@H](O)[C@H](O)[C@H]2O)[C@@H]2[C@H](C)O[C@@H](OC)C[C@H]12	2020	New modifications	Monoterpenoids	Cornus	Viridiplantae
C=C(C)[C@@H]1CC[C@@]2(O)CC[C@]3(C)[C@H](CC[C@@H]4[C@@]5(C)CC[C@H](O)C(C)(C)[C@@H]5CC[C@]43C)[C@@H]12	2020	New modifications	Triterpenoids	Juglans	Viridiplantae
C=C(CC[C@](C)(O)[C@H]1CCC2[C@@H]3C[C@@H](O)C4=CC(=O)C=C[C@]4(C)[C@H]3CC[C@@]21C)C(C)C	2020	New modifications	Steroids	Entandrophragma	Viridiplantae
C=C1CCC(C(C)(C)O)=C[C@H]2[C@H]1CC[C@@]2(C)O	2020	New modifications	Sesquiterpenoids	Curcuma	Viridiplantae
CC(=O)O[C@H]1C[C@H]2[C@@](C)(CC[C@H]3C(C)(C)CCC[C@@]32CO)[C@@H]2C[C@H](O)C3=C(C(=O)O[C@H]3C)[C@@]12C	2020	New modifications	Sesterterpenoids	Lendenfeldia	Metazoa
C[C@H]1[C@H](C)C[C@H](O)[C@]2(C)CC[C@]34C[C@]3(C(=O)[C@@H](O)[C@@H]3[C@@]5(C)CC[C@H](O)[C@@](C)(C(=O)O)[C@@H]5CC[C@]34C)[C@H]12	2020	New sites	Triterpenoids	Stewartia	Viridiplantae
C=C[C@]1(C)CC[C@H]2C(=CC[C@H]3[C@@](C)(COC(C)=O)CCC[C@]23C)[C@@H]1O	2020	New modifications	Diterpenoids	Callicarpa	Viridiplantae
CC(C)C(=O)C1=C(O)C2=C(OC(C)(C)[C@H]3CC[C@](C)(O)C[C@@H]23)C(C)(C)C1=O	2020	New skeletons	Meroterpenoids	Hypericum	Viridiplantae
C=C(C)[C@@H]1CC[C@@]2(C)O[C@]23CC(=O)C(C)=C3C1	2020	New modifications	Sesquiterpenoids	Daphne	Viridiplantae
C=C[C@]1(C)CC[C@@]2(C)c3ccc(O)c(C)c3C=C[C@@H]2C1	2020	Site combinations	Diterpenoids	Euphorbia	Viridiplantae
COC(=O)[C@@H]1[C@H]2C[C@@H]3c4[nH]c5cc(OC)ccc5c4CCN3C[C@H]2C[C@@H](O)[C@H]1O	2020	New sites	Meroterpenoids	Rauvolfia	Viridiplantae
C[C@]12C[C@H](OC(=O)c3ccccc3)[C@](C)(C=O)CC1[C@@]1(O)CCC3[C@@]4(C)CC[C@H](O[C@@H]5OC[C@H](O[C@@H]6O[C@H](CO)[C@@H](O)[C@H](O)[C@H]6O)[C@H](O)[C@H]5O[C@@H]5O[C@H](CO)[C@@H](O)[C@H](O)[C@H]5O)[C@@](C)(CO)C4CC[C@@]3(C)[C@]1(C)C[C@@H]2O	2020	New sites	Triterpenoids	Avena	Viridiplantae
CC1=C2[C@@H](OC1=O)[C@@H](O)[C@H]1CCC[C@H](C)[C@@]1(C)[C@H]2O	2020	New modifications	Sesquiterpenoids	Ligularia	Viridiplantae
COC(=O)C/C(C=O)=C\C[C@@]1(C)[C@H](C)C[C@H](OC(C)=O)[C@]2(COC(C)=O)[C@@H]1CCC[C@]21CO1	2020	New modifications	Diterpenoids	Ajuga	Viridiplantae
CC(=O)O[C@@H]1O[C@H](c2ccoc2)C[C@@]12[C@H]1CC[C@H]3O[C@@]3(C)[C@]1(C)CC[C@H]2C	2020	New modifications	Diterpenoids	Croton	Viridiplantae
CC(=O)O[C@H]1[C@H]2C3(CC[C@H](OC(C)=O)[C@]2(C)[C@@H](OC(C)=O)/C=C\C(CO)=C/[C@@H]2OC(=O)[C@H](C)[C@]21O)CO3	2020	New modifications	Diterpenoids	Ellisella	Metazoa
C=C1CC[C@@H]2C[C@H](O)[C@@](C)(CC/C=C(\C)CC[C@@H]1O)OC2(C)C	2020	New modifications	Diterpenoids	Lobophytum	Metazoa
CCCCCCCCCCCCCCCC(=O)OC[C@@]1(O)C[C@@]23CC[C@@H]4C5=CC(=O)N[C@]56O[C@@H]6[C@@H](O)[C@@]4(C)[C@@H]2CC[C@@H]1C3	2020	New modifications	Diterpenoids	Coffea	Viridiplantae
COC(=O)CC(=O)O[C@@H]1CC[C@]2(C)C3=C(C(=O)C[C@H]2C1(C)C)[C@]1(C)CC[C@H]([C@H](C)C[C@@H]2OC(=O)C(C)=C2C)[C@@]1(C)[C@H](O)C3	2020	New modifications	Triterpenoids	Heritiera	Viridiplantae
C=C1CC[C@H]2[C@H](c3ccccc3)c3c(O)c(C=O)c(O)c(C=O)c3O[C@]2(C)CC[C@@H]2[C@@H]1CC2(C)C	2020	New modifications	Meroterpenoids	Psidium	Viridiplantae
CC(C)=CCC/C(C)=C/CC1=C[C@](OC/C(=C\Cc2cc(O)ccc2O)C/C=C(\C)CCC=C(C)C)(c2cc(O)ccc2O)OC1=O	2020	New skeletons	Meroterpenoids	Ganoderma	Fungi
C/C1=C\C=C2/CC[C@](C)(OC[C@@H]2C)[C@H](O)CC/C(C)=C/CC1	2020	New modifications	Diterpenoids	Sarcophyton	Metazoa
C[C@H](CO)[C@H]1CC(=O)[C@]23[C@@H]4C=C(CO)CC[C@@H]4[C@@]2(C)CC[C@]13C	2020	New modifications	Diterpenoids	Candolleomyces	Fungi
CC(C)c1c(O)ccc2c1CC[C@H]1C(C)(C)C[C@@H](O)C[C@]21C	2020	Site combinations	Diterpenoids	Dacrycarpus	Viridiplantae
C[C@@]12CCC[C@@](C)(CO)[C@H]1CC[C@@]13C[C@@H](C(=O)O)[C@@H](C1)[C@@H](O)C[C@H]32	2020	New modifications	Diterpenoids	Zea	Viridiplantae
CC1(C)[C@@H](O)CC[C@]2(C)[C@H]3CC[C@H](O)[C@@](C)(CO)C=C3CC[C@@H]12	2020	New skeletons	Diterpenoids	Sigesbeckia	Viridiplantae
C=C(C)[C@H]1CC(=O)C[C@@H]2OC(C)(CC2=O)C[C@H]2C=C(C(=O)O2)[C@H](O)C1	2020	New modifications	Diterpenoids	Sinularia	Metazoa
CC(C)=CCC[C@@H](C)[C@H]1CC[C@@]2(C(=O)O)C3=C(CC[C@]12C)[C@@]1(C)CCC(=O)C(C)(C)[C@@H]1CC3	2020	New modifications	Triterpenoids	Penares	Metazoa
C=C1CC/C=C(\C)CC[C@H](C(=C)C)C/C=C(\C)CC[C@@H]1O	2020	New modifications	Diterpenoids	Sinularia	Metazoa
CO[C@H]1C[C@H]2[C@]3(CBr)CC[C@H]4C(C)(C)CCC[C@]4(C)[C@H]3C[C@@H](O)[C@]2(C)C2=C1C(=O)N(CC(=O)O)C2=O	2020	New sites	Sesterterpenoids	Hyrtios	Metazoa
CO[C@H](CC(=O)[C@](C)(O)[C@H]1[C@H](O)C[C@@]2(C)[C@@H]3CC=C4[C@@H](C[C@H](O)C(=O)C4(C)C)[C@]3(C)C(=O)C[C@]12C)C(C)(C)O	2020	New modifications	Triterpenoids	Trichosanthes	Viridiplantae
C=C(C)[C@H]1C[C@H](O)[C@]2(C)CCC[C@@H]3[C@@H]2[C@@H]1C[C@H](C)[C@@]3(C)CC/C(C)=C/[C@@H](O)[C@H]1CCC(=O)c2c(OC)cc(OC)cc21	2020	New skeletons	Others	Streptomyces	Bacteria
C[C@H]1CC[C@]2(C(=O)O[C@H]3OC(CO)[C@@H](O)[C@@H](O)C3O)CC[C@]3(C)C(=CC[C@@H]4[C@@]5(C)C[C@H](O)[C@@H](O)[C@@](C)(CO)[C@@H]5CC[C@]43C)C2[C@]1(C)O	2020	New modifications	Triterpenoids	Rhodomyrtus	Viridiplantae
CC(C)C1=C(O)C(=O)[C@@]2(O)C(=CC[C@H]3C(C)(C)CCC[C@@]32C)C1=O	2020	New sites	Diterpenoids	Salvia	Viridiplantae
C/C1=C\[C@@H](O)[C@H](C(C)C)CC/C(C)=C/CC/C(C=O)=C\CC1	2020	New modifications	Diterpenoids	Euphorbia	Viridiplantae
CC(C)[C@]1(O)CC[C@]2(C)C=C[C@](C)(O)C[C@@H](OC(=O)c3ccc(O)cc3)[C@H]21	2020	New modifications	Sesquiterpenoids	Ferula	Viridiplantae
CC(C)(O)[C@@H]1CC[C@]2(C)O[C@@H]2[C@@H](O)C[C@]2(C)O[C@H]2C1	2020	New modifications	Sesquiterpenoids	Solanum	Viridiplantae
CC(C)C1=C2C[C@H](O)[C@H](C)C3=C(C(=O)CC3)[C@H](O)[C@@]2(C)CC1	2020	New sites	Diterpenoids	Alternaria	Fungi
CC1C[C@@]2(O)C[C@]3(CCN4CC=C[C@@]1(C)C43)c1ccccc1N2	2020	New skeletons	Others	Melodinus	Viridiplantae
CC1(C)CCC[C@@]2(C)[C@H]1CC[C@@]1(C)[C@@H]3C[C@H](O)c4ccoc4[C@@H](O)[C@@]3(C)C[C@H]21	2020	New modifications	Sesterterpenoids	Hyrtios	Metazoa
C=C(C)[C@H]1CC[C@@]23C=C(C)[C@@H](CC2)C[C@H]3[C@]1(C)CCC(=O)O	2020	New modifications	Diterpenoids	Excoecaria	Viridiplantae
COC(=O)C1CCC(C2=CC(=O)CC(C)(C)C2)CC1	2020	New sites	Sesquiterpenoids	Zea	Viridiplantae
C=C1CO[C@@H]2C(C)=C3C(=O)C[C@H](C)[C@@H]3C[C@@]1(O)[C@H]2O	2020	Site combinations	Sesquiterpenoids	Daphne	Viridiplantae
CC1O[C@@H](O[C@H]2C(O)[C@@H](O)CO[C@H]2O[C@H]2CC[C@@]3(C)C(CC[C@]4(C)C3CC=C3[C@@H]5CC(C)(C)CC[C@]5(C(=O)O[C@@H]5OC(CO[C@@H]6OC(CO)[C@@H](O)C(O)[C@@H]6O)[C@@H](O)C(O)[C@@H]5O)CC[C@]34C)C2(C)C)C(O)[C@@H](O[C@@H]2OC(CO)[C@@H](O)C(O[C@@H]3OC(C)[C@H](OC4OC(CO)C(OC5OC(CO)C(O)[C@H](O)[C@@H]5O)[C@@H](O[C@@H]5OC(C)C(O)[C@H](O)[C@@H]5O)[C@@H]4O)[C@H](O)C3O)[C@@H]2O)C1O	2020	New modifications	Triterpenoids	Scabiosa	Viridiplantae
CC(C)(C)[C@]1(O)C[C@@H]2OC(=O)C[C@@]23C(=O)O[C@@H]2OC(=O)[C@H](O)[C@@]231	2020	New modifications	Sesquiterpenoids	Ginkgo	Viridiplantae
CC(C)CC(=O)OCCC1=C[C@@H]2OC(=O)C3=CO[C@@H](O[C@@H]4O[C@H](CO)[C@@H](O)[C@H](O)[C@H]4O)[C@H]1[C@@H]32	2020	New sites	Others	Lasianthus	Viridiplantae
CC1(C)C(=O)CC[C@]2(C)[C@H]3C[C@@H](O)[C@@]4(C)[C@@H](CC=C5C(=O)OC[C@@H]54)[C@]3(C)CC[C@@H]12	2020	New sites	Sesterterpenoids	Hyrtios	Metazoa
C=C[C@@]1(C)C=C2CC[C@H](C(=C)C)[C@@](C)(CCC(=O)O)[C@@H]2C[C@H]1O	2020	New modifications	Diterpenoids	Excoecaria	Viridiplantae
C=C1C=CC(=O)OC(C)(C)C1CC(=O)OC	2020	New sites	others	Tetradium	Viridiplantae
C[C@@H]1C[C@@H]2OC(=O)[C@]13CC[C@]14C[C@@H](OC1=O)C1(O)OC1(C)[C@@]1(O)C[C@@]2(O)[C@H]3C41	2020	New sites	Diterpenoids	Cephalotaxus	Viridiplantae
CO[C@@H]1CC[C@H]2C3=C1C(=O)O[C@H]3C[C@@H](C)[C@]21C[C@@H](c2ccoc2)OC1=O	2020	New modifications	Diterpenoids	Croton	Viridiplantae
COC(=O)C(O)(CO)[C@H]1CC=C2CCC[C@H](C)[C@@]2(C)C1	2020	New modifications	Sesquiterpenoids	Aquilaria	Viridiplantae
CC1=CC(=O)[C@H]2/C(C(=O)O)=C\C[C@H]3[C@@H]([C@@H](C)/C=C\[C@H](O)C(C)(C)O)CC[C@]3(C)C[C@H]12	2020	New modifications	Sesterterpenoids	Aspergillus	Fungi
CC(C)=CCC[C@H](C)[C@@H]1CC[C@@H](C)c2c(O)cc(C)cc21	2020	New modifications	Diterpenoids	Leucophyllum	Viridiplantae
COC(=O)CCC1=CCC[C@@H](C)[C@@]1(C)/C=C(\C)CO	2020	New modifications	Sesquiterpenoids	Undefined	Others
CC1(C)CC[C@]2(OC=O)CC[C@]3(C)C(=CCC4[C@@]5(C)CCC(=O)C(C)(C)C5CC[C@]43C)C2C1	2020	New modifications	Triterpenoids	Liquidambar	Viridiplantae
C[C@@H]1O[C@@H](O[C@@H]2[C@@H](O)[C@H](O)[C@@H](CO)O[C@H]2O[C@H]2C[C@]3(C)C(CC(=O)C4C([C@]5(C)CC[C@H](C(C)(C)O)O5)CC[C@]43C)[C@@]3(C)CC[C@H](O)C(C)(C)C23)[C@@H](O)[C@H](O)[C@H]1O	2020	New modifications	Triterpenoids	Panax	Viridiplantae
C=C(CC[C@H](C)[C@H]1CC[C@H]2C3=C(C(=O)C[C@@]21C)[C@@]1(C)CC[C@H](O)[C@H](O)[C@@H]1C[C@H]3O)[C@H](C)C(=O)O	2020	New modifications	Steroids	Taiwanofungus	Fungi
CC(=O)O[C@H]1C[C@@H](O)[C@@]2(C)C(CC[C@]3(C)C2[C@H](O)C=C2C4[C@@H](C)[C@@](C)(O)CC[C@]4(C)CC[C@]23C)C1(C)C	2020	New sites	Triterpenoids	Salvia	Viridiplantae
CO[C@]1(C)CC[C@@H]([C@@](C)(CCCC(C)C)OC)[C@@H]1C	2020	New modifications	Sesquiterpenoids	Trichoderma	Fungi
C=C1C[C@@]23CC[C@@H]4C(C)(C)[C@H](OC(C)=O)CC[C@@]4(C)[C@@H]2C[C@@H]1[C@@H](O)C3=O	2020	New modifications	Diterpenoids	Euphorbia	Viridiplantae
C=C1C[C@@]23CC[C@H]4[C@@](C)(CC[CH][C@@]4(C)C(=O)O)[C@@H]2CC[C@H]1C3	2020	New modifications	Diterpenoids	Mikania	Viridiplantae
CC1=CC[C@@H](O)[C@]2(C)[C@@H](OC(=O)/C=C/c3ccc(O)cc3)C[C@@H](C(C)C)[C@@H](O[C@@H]3O[C@H](CO)[C@@H](O)[C@H](O)[C@H]3O)[C@@H]12	2020	New modifications	Sesquiterpenoids	Viridiplantae gen.	Viridiplantae
CC(C)(O)/C=C/C[C@](C)(O[C@@H]1O[C@H](CO)[C@@H](O)[C@H](O)[C@H]1O)C1CC[C@]2(C)C1[C@H](O)CC1[C@@]3(C)C[C@@H](O)C(O[C@@H]4O[C@H](CO)[C@@H](O)[C@H](O)[C@H]4O[C@@H]4O[C@H](CO)[C@@H](O)[C@H](O)[C@H]4O)C(C)(C)C3CC[C@]12C	2020	New modifications	Triterpenoids	Gynostemma	Viridiplantae
C[C@H]1CC[C@H](CO)C(CO)=C2C[C@@](C)(CO)C[C@@H]21	2020	New modifications	Sesquiterpenoids	Phellinus	Fungi
C=C(C)[C@@]12OC3(c4ccccc4)O[C@@H]1[C@@H]1[C@@H]4O[C@]4(CO)[C@@H](O)[C@]4(O)C(=O)C(C)=C[C@H]4[C@@]1(O3)[C@H](C)[C@H]2OC(=O)CCC	2020	New modifications	Diterpenoids	Daphne	Viridiplantae
COC(=O)C(C)(C)[C@H]1CC[C@]23C=C[C@](C)(C2)C(=O)C[C@H]3[C@]1(C)CC(=O)O	2020	New sites	Diterpenoids	Euphorbia	Viridiplantae
CC1(C)CC(=O)C[C@@]2(C)C1CC=C1C(=O)OC[C@@H]12	2020	New modifications	Sesquiterpenoids	Inonotus	Fungi
C/C=C\C(=O)O[C@@H]1C[C@@H]2O[C@@H]3C=C(C)C(=O)C4OC[C@@]2(O)[C@@]1(C)[C@@]43C	2020	New modifications	Sesquiterpenoids	Trichothecium	Fungi
CC(C)CC1C[C@]2(CC[C@@]34[C@@H](C)CC[C@H](C(C)C)[C@@H]3[C@@H]24)OC2=C1C(=O)C(C)(C)C(=O)C2(C)C	2020	New modifications	Meroterpenoids	Rhodomyrtus	Viridiplantae
COC[C@@H]1C(=O)[C@@]23[C@H]4O[C@H]5O[C@@]2(O)[C@@H](O)[C@@H]2C(C)(C)CCC[C@]52[C@@H]3[C@@H](OC(C)=O)C[C@H]41	2020	New sites	Diterpenoids	Isodon	Viridiplantae
C[C@]12CCC[C@H](C(=O)O[C@@H]3O[C@H](CO)[C@@H](O)C(O)[C@H]3O)C1CC[C@H]1O[C@@H]([C@@H](O)CO)CC[C@@H]12	2020	New skeletons	Others	Pinus	Viridiplantae
CC1=C[C@H](O/C=C2/C(=O)O[C@@H]3C4=C(CCCC4(C)C)C[C@H]23)OC1=O	2020	New modifications	Others	Arabidopsis	Viridiplantae
C/C1=C\C(O)C[C@@]2(C)O[C@@](C)(O)[C@H](CC/C(C)=C/CC1)C[C@@H]2O	2020	New sites	Diterpenoids	Lobophytum	Metazoa
CCN1C[C@@]2(COC)C3[C@@H](OC)C4C1C3([C@@H](OC)C[C@H]2O)[C@@H]1C[C@]2(O)[C@@H](OC)C[C@@]4(OC)[C@H]1[C@H]2OC(=O)c1ccccc1	2020	Site combinations	Diterpenoids	Aconitum	Viridiplantae
CC(=O)[C@@]1(CC(=O)C[C@H](C)C(=O)O)CC(=O)[C@@]2(C)C3=C(O)C[C@H]4C(C)(C)C(=O)CC[C@]4(C)C3=CC(=O)[C@]12C	2020	New skeletons	Triterpenoids	Ganoderma	Fungi
C#Cc1c(C)c(O)c2c3c(c(C)ccc13)C[C@@H](O)[C@]2(O)C(C)C	2020	New skeletons	Others	Flueggea	Viridiplantae
CC1=CCOO[C@H]1C[C@@]1(C)[C@H](C)[C@H](O)C[C@@]2(C)C(C)=CC(=O)C[C@@H]21	2020	New modifications	Diterpenoids	Stachys	Viridiplantae
C=C(C)[C@@H](O)COc1ccc(CC(=O)OC)cc1	2020	New modifications	Others	Penicillium	Fungi
COC(=O)[C@@]12C(=O)[C@](C)(O)C(=O)[C@@H](C(C)=C1C)[C@H]1[C@]34CC[C@@H](OC(C)=O)C(C)(C)C3[C@H](C[C@]12C)OC4=O	2020	New skeletons	others	Penicillium	Fungi
C=C1CCC[C@]1(C)[C@@]1(C)CCC(C)=C[C@H]1OC1OC(CO)C(O)C(O)C1NC(C)=O	2020	New modifications	Sesquiterpenoids	Trichoderma	Fungi
CC1O[C@@H](O[C@H]2C(O)[C@H](O)CO[C@H]2O[C@H]2CC[C@@]3(C)C(CC[C@]4(C)C3CC=C3[C@@H]5CC(C)(C)CC[C@]5(C(=O)O[C@@H]5OC(CO[C@@H]6OC(CO)[C@@H](O)C(O)[C@@H]6O)[C@@H](O)C(O)[C@@H]5O)CC[C@]34C)C2(C)C)C(O)[C@@H](O[C@@H]2OC(CO)[C@@H](O)C(O[C@@H]3OC(C)[C@H](OC4OC(CO)C(OC5OC(CO)C(O)[C@H](O)[C@@H]5O)[C@@H](O[C@@H]5OC(C)C(O)[C@H](O)[C@@H]5O)[C@@H]4O)[C@H](O)C3O)[C@@H]2O)C1O	2020	New modifications	Triterpenoids	Scabiosa	Viridiplantae
C=C1CC[C@H]2[C@](C)(CCC=C(C)C)[C@H](O)CC[C@]2(C)[C@@H]1C[C@@]1(C(=O)OC)OC=C(C)C1=O	2020	New skeletons	others	Colletotrichum	Fungi
CC(=O)OC[C@]1(C)CCC[C@]2(C)[C@@H]1CC[C@@]1(O)CC(C)(C)C[C@@H](OC(C)=O)[C@H]12	2020	New sites	Diterpenoids	Phalaris	Viridiplantae
C[C@H](CC(=O)[C@@H]1OC1(C)C)[C@H]1C(=O)C[C@@]2(C)C3=CC[C@H]4C(C)(C)[C@@H](O[C@@H]5OC[C@@H](O)[C@H](OC[C@@H]6OC[C@@H](O)[C@H](O)[C@H]6O)[C@H]5O)CC[C@@]45C[C@@]35[C@@H](O)C[C@]12C	2020	New modifications	Triterpenoids	Actaea	Viridiplantae
COC(=O)C(OC(C)=O)[C@H]1C(C)(C)[C@H](O)[C@]2(O)CC3=C4CC(=O)O[C@@H](C5=CC(O)OC5=O)[C@]4(C)CC[C@@H]3[C@@]1(C)C2=O	2020	Site combinations	Triterpenoids	Xylocarpus	Viridiplantae
C=C[C@@]1(C)CC[C@@H]2[C@@](O)(CC[C@@H]3[C@](C)(COC(C)=O)[C@@H](OC(C)=O)CC[C@@]23C)C1	2020	New modifications	Diterpenoids	Phalaris	Viridiplantae
C=C(C)[C@H]1CC[C@@]23C[C@@H]4[C@@H](C[C@H]2[C@]1(C)CCC(=O)O)[C@@]4(CO)C3	2020	New sites	Diterpenoids	Excoecaria	Viridiplantae
C=C1C=C[C@@H]2O[C@H](C(C)(C)O)CC[C@]2(C)[C@@]1(C)O	2020	New sites	Sesquiterpenoids	Alkekengi	Viridiplantae
CC(=O)O[C@H]1C(C)=C[C@@]23C(=O)[C@H]([C@H]4[C@@H](C[C@H]2C)C4(C)C)[C@@H](O)[C@@](C)(O)[C@@H](OC(C)=O)[C@]13O	2020	Site combinations	Diterpenoids	Euphorbia	Viridiplantae
C=C(CO)CCC[C@]1(C)C(=O)CC[C@@]23C[C@@H](CC[C@H]21)[C@](C)(O)C3	2020	New modifications	Diterpenoids	Pieris	Viridiplantae
CC1=C/C(=C2/[C@H](C)CC[C@@H]2[C@H](C)CO)OC1=O	2020	New skeletons	Others	Rhodotus	Fungi
CC1(C)CCC[C@](C)(c2ccc(C(=O)O)cc2O)O1	2020	New modifications	Sesquiterpenoids	Pestalotiopsis	Fungi
C[C@H]1CC[C@@H](O)[C@]2(C)CC[C@@H]([C@@](C)(O)CO)C[C@@]12O	2020	Site combinations	Sesquiterpenoids	Datura	Viridiplantae
COC(=O)C1=CO[C@@H](O[C@@H]2O[C@H](CO)[C@@H](O)[C@H](O)[C@H]2O)[C@@H]2[C@H](C)O[C@@H](OC[C@H]3O[C@](O)(CO)[C@@H](O)[C@@H]3O)C[C@H]12	2020	New modifications	Monoterpenoids	Cornus	Viridiplantae
CC1C[C@@H]2c3c(coc3C1=O)C(O)C[C@H]2C(C)C	2020	New sites	Sesquiterpenoids	Talipariti	Viridiplantae
CO[C@H]1C[C@H]2[C@](C)(C3=C(C)[C@H](c4ccoc4)C[C@@H]3O1)[C@H](O)[C@@H]1OC[C@]3(C)[C@H](OC(C)=O)C[C@H](OC(=O)/C=C/c4ccccc4)[C@@]2(C)[C@@H]13	2020	New modifications	Triterpenoids	Melia	Viridiplantae
CC[C@@]1(C)CC[C@]2(C)C[C@@]34[C@@H](C)C=CC(=O)[C@]3(C)[C@@H](O)C[C@H]4[C@H]12	2020	New skeletons	Diterpenoids	Penicillium	Fungi
C/C=C\C(=O)O[C@@H]1C[C@H]2O[C@@H]3C=C(C)CC[C@]3(C)[C@]1(C)[C@@]2(O)CO	2020	New modifications	Sesquiterpenoids	Alternaria	Fungi
Cc1cc(=O)c(C)c2c3c1C[C@@H]1[C@@H]4C[C@@H](C)[C@@](CC2)(C(=O)O4)[C@]31O	2020	New skeletons	Diterpenoids	Cephalotaxus	Viridiplantae
CC(C)C1=CC2=CCC3[C@@](C)(CO)CCC[C@]3(C)[C@H]2CC1	2020	New modifications	Diterpenoids	Setaria	Viridiplantae
CNc1ccccc1C(=O)O[C@H]1C[C@@]2(C)C(C[C@@]1(C)CO)[C@@]1(O)C(=O)CC3[C@@]4(C)CC[C@H](O[C@@H]5OC[C@H](O[C@@H]6O[C@H](CO)[C@@H](O)[C@H](O)[C@H]6O)[C@H](O)[C@H]5O[C@@H]5O[C@H](CO)[C@@H](O)[C@H](O)[C@H]5O)[C@@](C)(CO)C4CC[C@@]3(C)[C@]1(C)C[C@@H]2O	2020	New sites	Triterpenoids	Avena	Viridiplantae
CC1O[C@@H](O[C@H]2C(O)[C@H](O)CO[C@H]2O[C@H]2CC[C@@]3(C)C(CC[C@]4(C)C3CC=C3[C@@H]5CC(C)(C)CC[C@]5(C(=O)O[C@@H]5OC(CO[C@@H]6OC(CO)[C@@H](O)C(O)[C@@H]6O)[C@@H](O)C(O)[C@@H]5O)CC[C@]34C)[C@]2(C)CO)C(O)[C@@H](O[C@@H]2OC(CO)[C@@H](O)C(O[C@@H]3OC(C)[C@H](OC4OC(CO)C(OC5OC(CO)C(O)[C@H](O)[C@@H]5O)[C@@H](O[C@@H]5OC(C)C(O)[C@H](O)[C@@H]5O)[C@@H]4O)[C@H](O)C3O)[C@@H]2O)C1O	2020	New modifications	Triterpenoids	Scabiosa	Viridiplantae
CC1(C)CCC[C@]2(C)C3=C(CC[C@@H]12)C(=O)N(CC(=O)O)C3	2020	New modifications	Sesquiterpenoids	Undefined	Others
CO[C@H]1O[C@@H](OC(=O)CC(C)C)[C@H]2C(=C1COC(=O)CC(C)C)C=C[C@]2(O)COC(=O)CC(C)C	2020	New modifications	Monoterpenoids	Patrinia	Viridiplantae
CC1(C)CCC[C@]2(C)C3=C(CC[C@@]12C)C(=O)N(CC(=O)O)[C@H]3O	2020	New skeletons	Sesquiterpenoids	Undefined	Others
CC(=O)[C@@H](C)[C@@H]1C[C@]2(C=C3[C@H](O)CC4[C@@]5(C)CC[C@H](O[C@@H]6OC[C@H](O)[C@H](O)[C@H]6O[C@@H]6O[C@H](CO)[C@@H](O)[C@H](O)[C@H]6O)C(C)(C)C5CC[C@@]4(C)[C@]3(C)CC2)C(=O)O1	2020	New modifications	Triterpenoids	Ilex	Viridiplantae
C=C1[C@@H](O)C[C@H]2C(C)(C)CCC[C@]2(C)[C@H]1C/C=C(/CO)[C@@H](O)CO	2020	Site combinations	Diterpenoids	Artemisia	Viridiplantae
CC(C)c1cc2c(cc1O)C[C@@]1(O)CCC(=O)C(C)(C)[C@@H]1CC2	2020	Site combinations	Diterpenoids	Dacrycarpus	Viridiplantae
C=C1CCC[C@@H]2[C@@]3(C)[C@@H](OC(=O)c4ccccc4)C[C@@]4(COC(=O)C4)O[C@@]3(C)[C@@H](O)[C@H](OC(=O)c3ccccc3)[C@@]12C	2020	New modifications	Diterpenoids	Scutellaria	Viridiplantae
C[C@@H]1C2C3=C[C@@H](O)C4[C@@]5(C)CCC(=O)C(C)(C)C5CC[C@@]4(C)[C@]3(C)CC[C@@]2(C)CC[C@]1(C)O	2020	New sites	Triterpenoids	Salvia	Viridiplantae
CC1=CCC[C@H]2[C@@]1(C)[C@@H](OC(=O)c1cccnc1)[C@H](OC(=O)C(O)C(C)C)[C@](C)(O)[C@]2(C)CCC1=CC(=O)OC1	2020	New modifications	Diterpenoids	Scutellaria	Viridiplantae
C[C@@H]1CCC[C@]2(C)[C@@H](O)C[C@H](C(C)(C)O)[C@H]2C1=O	2020	New modifications	Sesquiterpenoids	Dysphania	Viridiplantae
C=C[C@@]1(C)CC[C@H]2[C@@]3(C)CCCC(C)(C)[C@H]3CC[C@@]2(C)O1	2020	New modifications	Diterpenoids	Vitex	Viridiplantae
C=Cc1cc2c(cc1OC)[C@]1(C)CC[C@@H](O)C(C)(C)[C@H]1C=C2	2020	Site combinations	Diterpenoids	Flueggea	Viridiplantae
CC(=O)O[C@H]1CC/C(C)=C\[C@@H]2OC(=O)[C@H](C)[C@@]2(O)[C@@H](OC(C)=O)[C@H]2[C@@H](C)C(=O)C=C[C@]12C	2020	New modifications	Diterpenoids	Briareum	Metazoa
C=C(C)[C@H]1CC[C@]2(C(=O)O)CC[C@]3(C)[C@H](CC[C@@H]4[C@@]5(C)[C@H](C(=O)O)[C@@H](O)[C@](C)(CO)[C@@H]5CC[C@]43C)[C@@H]12	2020	New modifications	Triterpenoids	Colubrina	Viridiplantae
C=C1CC[C@H]2[C@@](C)(CO)CCC[C@]2(C)[C@@H]1CC/C(C)=C/CO	2020	New modifications	Diterpenoids	Hesperocyparis	Viridiplantae
CC(=O)O[C@H]1C[C@@H]2[C@@](C)(CO)CCC[C@@]2(C)[C@@H]2C=C[C@@H]3C[C@]12C=C3C	2020	Site combinations	Diterpenoids	Sideritis	Viridiplantae
Cc1c(O)cc2c(c1C)C(=O)O[C@@H]([C@]1([C@H]3CCC4=CCC[C@H](C)[C@@]4(C)C3)CO1)O2	2020	New modifications	Sesquiterpenoids	Colletotrichum	Fungi
C/C=C(/C)C(=O)O[C@@]1(C)CC[C@]2(O)[C@H](C(C)C)CC[C@]2(C)CC1=O	2020	New modifications	Sesquiterpenoids	Ferula	Viridiplantae
COC(=O)CCCCCC/C=C(/C=O)C[C@H]1C(=O)[C@@]23C4[C@@H](OC(C)=O)C[C@@H]1[C@@H]2OC1O[C@@]3(O)[C@@H](O)[C@@H]2C(C)(C)CCCC142	2020	New skeletons	Diterpenoids	Isodon	Viridiplantae
CO[C@]12CC(C)[C@@]3(C)C=CCN4CC[C@@](C1)(c1ccccc1N2)C43	2020	New skeletons	Others	Melodinus	Viridiplantae
C=C1CC[C@@H]2O[C@]2(CO)C[C@@H](O)C2=CCC[C@@]2(C)CC1	2020	New skeletons	others	Anthelia	Metazoa
C=C(C)[C@H]1C[C@@H](O)[C@H](C)[C@H]2CCC(C(=O)OC)=C[C@H]12	2020	New sites	Sesquiterpenoids	Myristica	Viridiplantae
CC1(C)CC[C@]2(C)C(=O)[C@H](O)[C@]3(C)C(=C2C1)C=C[C@@H]1[C@@]2(C)CC[C@H](O[C@@H]4O[C@H](C(=O)O)[C@@H](O)[C@H](O[C@@H]5O[C@H](CO)[C@@H](O)[C@H](O)[C@H]5O)[C@H]4O)[C@@](C)(CO)[C@@H]2CC[C@]13C	2020	New sites	Triterpenoids	Toxicopueraria	Viridiplantae
CC(C)[C@@H]1CC[C@H](CO)[C@@H]2OCC(C(=O)O)=C[C@H]12	2020	New sites	Sesquiterpenoids	Undefined	Others
CC1(C)OC(=O)C[C@]2(C)[C@@H]1CC[C@]13C=C[C@](C)(C1)C(=O)C[C@@H]23	2020	New sites	Diterpenoids	Euphorbia	Viridiplantae
COC(=O)[C@@]12C(=O)[C@@](C)(O)[C@]1(C)C(C)=C[C@@H]1[C@]2(C)C[C@@H]2OC(=O)[C@]13CC[C@H](OC(C)=O)C(C)(C)[C@@H]23	2020	New skeletons	others	Penicillium	Fungi
C=C(C(=O)OC)[C@@H]1[C@@H](OC(=O)/C(C)=C\C)C[C@]2(C)[C@H](C(C)=CC[C@H]2O)[C@H]1O	2020	New modifications	Sesquiterpenoids	Artemisia	Viridiplantae
C=Cc1cncc2c1C[C@@H]1N[C@H]2Cc2c1[nH]c1ccccc21	2020	New sites	Others	Rauvolfia	Viridiplantae
CC(=S)[C@@H]1CC[C@]2(C)[C@H](C[C@@H](O[C@@H]3OC[C@H](O)[C@H](O)[C@H]3O)[C@@H]3[C@@H]([C@@](C)(O)C[C@@H]4O[C@H]4C(C)(C)O)CC[C@]32C)[C@@]1(C)CCC(=O)O	2020	New sites	Others	Cyclocarya	Viridiplantae
CC1(C)CCC=C(C2CC=C(C(=O)O)CC2)C1O	2020	New modifications	Sesquiterpenoids	Zea	Viridiplantae
CO[C@@H]1C=C2[C@@H](C)[C@@H]3[C@H](O)[C@H](OC(=O)C=Cc4ccccc4)[C@@]4(O)C(C)(C)CCC[C@]4(C)[C@H]3C[C@@]2(OC)O1	2020	New modifications	Diterpenoids	Caesalpinia	Viridiplantae
CCCCCCC(O)C(=O)O[C@@H]1[C@@H]2[C@H](CC1(C)C)[C@@H](OC)[C@@H](OC)C1=C(O)C(=O)C(=O)[C@@]12C	2020	New sites	Sesquiterpenoids	Cerrena	Fungi
CC1=C(CC[C@@](C)(O)[C@@H](O)CO)[C@@]2(C)CCCC(C)(C)C2CC1	2020	New modifications	Diterpenoids	Madia	Viridiplantae
CC[C@H](C)[C@@H]1NC(=O)[C@@H]2C[C@@H](O)CN2C1=O	2020	New skeletons	Monoterpenoids	Axinella	Metazoa
C=C(CC[C@@H](C(=O)O)[C@H]1C(=O)C[C@@]2(C)C3=C[C@H](O)[C@H]4C(C)(C)C(=O)CC[C@]4(C)C3=CC[C@]12C)C(C)C	2020	New modifications	Triterpenoids	Chisocheton	Viridiplantae
C[C@@]1(CCO)CC2=CC[C@H]3[C@](C)(O)CCC[C@]3(C)[C@H]2[C@@H](O)C1	2020	Site combinations	Diterpenoids	Xylaria	Fungi
C/C1=C\CC/C(C)=C/[C@H]2[C@@H](CC/C(C)=C/CC1)C2(C)C	2020	New modifications	Diterpenoids	Oryza	Viridiplantae
CC1(C)CC[C@@]23CC[C@]4(OC2=O)[C@]2(C)CCC5C(C)(C)C(=O)CC[C@]5(C)C2[C@@H]2O[C@@H]2[C@@]4(C)C3C1	2020	Site combinations	Triterpenoids	Liquidambar	Viridiplantae
CC(=O)O[C@@H]1CCC(C)(C)c2ccc3c(c21)C(=O)C(=O)c1c(C)coc1-3	2020	New modifications	Diterpenoids	Salvia	Viridiplantae
CO[C@H]1O[C@@H](OC)[C@@]2(O)[C@]1(O)[C@@H](O)C[C@H]1[C@]3(C)CC[C@H]4C(C)(C)CCC[C@]4(C)[C@H]3C[C@@H](O)[C@@]12C	2020	New sites	Sesterterpenoids	Hyrtios	Metazoa
CC(=O)O[C@@H]1CO[C@@H](O[C@H]2CC[C@]34C[C@]35CC[C@]3(C)[C@@H]([C@@]6(C)CC[C@@H](C(C)(C)O)O6)[C@@H](O)C[C@@]3(C)[C@@H]5C[C@H](O[C@@H]3O[C@H](CO)[C@@H](O)[C@H](O)[C@H]3O)[C@H]4C2(C)C)[C@H](OC(C)=O)[C@H]1O	2020	New modifications	Triterpenoids	Astragalus	Viridiplantae
CC(C)CNC(=O)/C=C/C/C=C/c1ccc2c(c1)OCO2	2020	New sites	Others	Zanthoxylum	Viridiplantae
COC(=O)c1ccc2c(c1)C[C@@H]1[C@](C)(C[C@H](O)[C@@H]3[C@]4(C)[C@@H]([C@H](O)C[C@@]13C)C(C)(C)CC[C@H]4O)O2	2020	New sites	Meroterpenoids	Cyanobacterium	Bacteria
CC(=O)Oc1c(C(C)C)cc2c(c1OC(C)=O)C1=C(CC2)C(C)(C)CC[C@@H]1OC(C)=O	2020	New modifications	Diterpenoids	Ekebergia	Viridiplantae
C=C(C)[C@@H]1CC[C@]2(C)O[C@@]23CC(=O)C(C)=C3C1	2020	New modifications	Sesquiterpenoids	Stellera	Viridiplantae
CC(C)C1=CC(=O)C2=C(O[C@H]3OCC24CCCC(C)(C)C34)C1=O	2020	New modifications	Diterpenoids	Plectranthus	Viridiplantae
CC(C)C1=CCC2=C(CC[C@@H]3[C@]2(C)CCC[C@@]3(C)C(=O)O)C1	2020	New modifications	Diterpenoids	Tripterygium	Viridiplantae
C=C(CC[C@H](C)[C@H]1CC[C@@]2(C)[C@@H]3CC[C@H]4[C@@H](C)[C@H](O)CC[C@@]45C[C@@]35CC[C@]12C)C(C)C	2020	New modifications	Triterpenoids	Toona	Viridiplantae
C=C[C@@]1(C)CC[C@@H]2[C@@]3(C)CCC[C@](C)(C(=O)OC)[C@@H]3CC[C@@]2(O)C1	2020	New modifications	Diterpenoids	Toona	Viridiplantae
COC(=O)[C@@H]1O[C@@H](O)C(=O)[C@]2([C@H](O)/C=C(C)/C=C/C=C(\CO)CCC=C(C)C)O[C@H]12	2020	New sites	Meroterpenoids	Trichothecium	Fungi
C/C=C(/C)C(=O)O[C@H]1CC[C@]2(C)C[C@]3(OC)OC(=O)C(C)=C3C[C@H]2[C@]1(C)O	2020	New modifications	Sesquiterpenoids	Syringa	Viridiplantae
C[C@]1(CO)CCC[C@]2(C)[C@H]3CC[C@@H]4C[C@@]3(CC[C@@H]12)C[C@@]4(C)O	2020	New sites	Diterpenoids	Vachellia	Viridiplantae
CC1=C2C3=C[C@](C)(O)CC[C@H]3[C@@H](C)C[C@@H]2OC1=O	2020	New modifications	Sesquiterpenoids	Mikania	Viridiplantae
C[C@H]1CCC(=O)[C@]23C[C@H]4[C@H]([C@@]4(C)C[C@H]2O)[C@@]13C	2020	New skeletons	Sesquiterpenoids	Aristolochia	Viridiplantae
CCCC(=O)O[C@H]1C/C=C(\C)C[C@H]2O[C@@H]3[C@H]4[C@@H]2[C@@H](OC(C)=O)[C@@H](C)C[C@@H]4[C@H](C)CO[C@]13C	2020	New modifications	Diterpenoids	Briareum	Metazoa
C=C(C)[C@@]12OC3(/C=C/C=C/C=C/CCC)O[C@H]1[C@@H]1[C@H]4OC4(CO)[C@H](O)[C@]4(O)C(=O)C(C)=C[C@H]4[C@@]1(O3)[C@@H](C)[C@@H]2OC(=O)c1ccccc1	2020	New modifications	Diterpenoids	Daphne	Viridiplantae
C[C@@H]1C(=O)CCC2[C@]3(C)CC[C@@]4(C)C5CC(C)(C)CC[C@]5(C=O)CC[C@]4(C)C3CC[C@@]21C	2020	New modifications	Triterpenoids	Tripterygium	Viridiplantae
COC(=O)CC[C@]12C[C@]13CC[C@]1(C)[C@@H]4[C@H](C[C@@]1(C)[C@@H]3CC[C@H]2C(C)(C)O)O[C@]1(C=C(C)C(=O)O1)C[C@H]4C	2020	New modifications	Triterpenoids	Pseudolarix	Viridiplantae
C=C1C(=O)O[C@@H]2C[C@H](C)[C@@]34C[C@@]5(C(=O)O[C@@H]6C[C@H](C)C(CCC(C)=O)=C[C@H](OC(C)=O)[C@@H]65)[C@H](C(C)=C3C[C@H]12)[C@@H]4OC(C)=O	2020	New modifications	Sesquiterpenoids	Inula	Viridiplantae
CC(=O)O[C@H]1CC[C@@](C)(O)[C@@H](O)CC/C(C)=C/C[C@]2(C(C)C)CC[C@@]1(C)O2	2020	New modifications	Diterpenoids	Populus	Viridiplantae
C[C@H]1[C@H]([C@](C)(O)CCCC(C)(C)O)CC[C@@]1(C)O	2020	New modifications	Sesquiterpenoids	Trichoderma	Fungi
CC1=C2CC/C(C)=C/CC[C@]3(C)O[C@H]3CC/C(C)=C/[C@@H]2OC1=O	2020	New modifications	Diterpenoids	Sarcophyton	Metazoa
CC1(C)O[C@@]23C[C@@H]1CC[C@]2(C)CCCC3=O	2020	New modifications	Sesquiterpenoids	Aquilaria	Viridiplantae
CC1=C2CC[C@H](C)[C@@H]2C[C@@H]2[C@H](CO)CO[C@]12CO	2020	New skeletons	Sesquiterpenoids	Daphne	Viridiplantae
CC(=O)OC[C@H]1[C@H]2C(C(=O)O)=C(C)[C@]1(C)CC[C@@H]2C(C)C	2020	New modifications	Sesquiterpenoids	Bipolaris	Fungi
C=C1[C@H](O)C[C@H]2[C@@](C)(C(=O)O)CCC[C@]2(C)[C@H]1CC/C(C)=C/C(=O)O	2020	New modifications	Diterpenoids	Forsythia	Viridiplantae
C=C1CC[C@@H](OC(C)=O)[C@@]2(C)CC[C@@](C(C)C)(C[C@H]3O[C@@]3(C)C[C@H]3O[C@H]13)O2	2020	Site combinations	Diterpenoids	Boswellia	Viridiplantae
CC(C)C1=C[C@H]2C[C@]3(C=O)[C@@H]4CC[C@@H](C)[C@H]4C[C@@]2(CO)[C@]13C(=O)O	2020	New modifications	Diterpenoids	Lentzea	Bacteria
CCC(C)C(=O)C1=C(O)C(C)(C)C(=O)C2=C1O[C@]1(C)CC[C@H](C(C)(C)O)[C@H]2C1	2020	New skeletons	Others	Hypericum	Viridiplantae
C[C@]1(CCO)CCC2=C(C1)C(=O)C[C@@H]1[C@]2(C)CCC[C@@]1(C)O	2020	New modifications	Diterpenoids	Xylaria	Fungi
C=C1C[C@@]23CC[C@@H]4C(C)(C)[C@H](OC(C)=O)CC[C@@]4(C)[C@@H]2C[C@@H]1[C@@H](OC(C)=O)C3=O	2020	New modifications	Diterpenoids	Euphorbia	Viridiplantae
CC(C)C(=O)CC[C@H]1C(=O)C=C[C@@H]2[C@]1(C)CCC[C@@]2(C)C(=O)O	2020	New sites	Sesquiterpenoids	Populus	Viridiplantae
CC(=O)OC[C@]12CCCC(C)(C)[C@@H]1CC[C@@]1(C)[C@@H]3C[C@H](O)[C@H]4[C@H](C)O[C@@H](O)[C@@H]4[C@@]3(C)[C@@H](O)C[C@@H]12	2020	New modifications	Sesterterpenoids	Lendenfeldia	Metazoa
COC1C(O)=C2[C@@H]3[C@@H](C)[C@H](C)CC[C@]3(C)CC[C@@]2(C)[C@]2(C)CC[C@H]3[C@](C)(C(=O)O)[C@@H](O)CC[C@]3(C)[C@@H]12	2020	New sites	Triterpenoids	Ganoderma	Fungi
C/C(=C/[C@@H](O)C/C(C)=C/CC/C(C)=C/CC/C(C)=C/CO)CO	2020	New modifications	Diterpenoids	Bifurcaria	Others
C=C1[C@H]2C[C@H](OC(C)=O)[C@@](COC(=O)C(OC(=O)CC(C)C)C(C)C)(O[C@H]1OC)[C@H]2C(OC)OC	2020	New modifications	Monoterpenoids	Valeriana	Viridiplantae
COC(=O)[C@]1(C)CCC[C@@]2(C)[C@@H]3CC[C@@H]4C[C@]3(C=C4C(=O)O)CC[C@@H]21	2020	New modifications	Diterpenoids	Zea	Viridiplantae
CCN1C[C@]2(COC)CC[C@H](OC)C34C1OC(C=C1C[C@H](OC)C5C[C@@H]3[C@@H]1[C@H]5OC(=O)c1ccccc1)C42	2020	New skeletons	Diterpenoids	Aconitum	Viridiplantae
C/C(=C/CC[C@@](C)(O)[C@@H]1CC[C@](C)(O)[C@H]1C)CO	2020	New modifications	Sesquiterpenoids	Trichoderma	Fungi
C[C@@H]1O[C@H](O[C@H]2[C@H](O[C@H]3CC[C@@]4(C)C(CC[C@]5(C)C4CC=C4[C@@H]6CC(C)(C)CC[C@]6(C(=O)O)[C@H](O)C[C@]45C)[C@]3(C)C=O)O[C@H](C(=O)O)[C@@H](O)[C@H]2O[C@@H]2O[C@@H](CO)[C@H](O)C(O)[C@@H]2O)C(O)[C@H](O)[C@H]1O	2020	New modifications	Triterpenoids	Momordica	Viridiplantae
C=C(C)CC1Oc2c(O)c(C(C)C)cc3ccc(C)c(c23)C1=O	2020	New modifications	Diterpenoids	Salvia	Viridiplantae
C[C@H]1C2=C(CC[C@@]34COC(=O)C3=C[C@@H](O)C[C@H]14)C(=O)O[C@H]2c1ccoc1	2020	New modifications	Diterpenoids	Salvia	Viridiplantae
C=C/C(C)=C/C[C@H]1C(=C)C[C@@H](O)[C@H]2[C@@](C)(C(=O)O)CCC[C@]12C	2020	New modifications	Diterpenoids	Salvia	Viridiplantae
C=C(C)[C@@H]1CC[C@]23O[C@H]2[C@H](C[C@](C)(O)[C@H](O)c2cc(C=O)c(o2)C1)OC3=O	2020	New modifications	Diterpenoids	Leptogorgia	Metazoa
COc1cc(C(=O)O[C@@H]2[C@H]3CC[C@H](C3)C2(C)C)ccc1O	2020	New modifications	Monoterpenoids	Ferula	Viridiplantae
CCC(CC[C@H](C)[C@@H]1CCC2C3CC=C4C[C@H](OC5O[C@@H](CO)[C@H](O)[C@@H](O)[C@@H]5O)CC[C@]4(C)C3CC[C@@]21C)C(C)C	2020	New modifications	Steroids	Aristolochia	Viridiplantae
C/C=C(/C)C(=O)O[C@H]1CC[C@]2(C)CC3([C@]45C[C@@]6(C)CC[C@H](OC(=O)/C(C)=C\C)[C@H](C)[C@@H]6CC4=C(C)C(=O)O5)OC(=O)C(C)=C3C[C@H]2[C@H]1C	2020	New sites	Others	Dobinea	Viridiplantae
C=C1C(=O)O[C@H]2C[C@H](C)[C@@]34C[C@@]5(C(=O)O[C@@H]6C[C@H](C)C7C(OC(C)=O)C[C@@H](O)[C@@]7(C)C[C@@H]65)[C@H](C(C)=C3C[C@H]12)[C@@H]4OC(C)=O	2020	New modifications	Sesquiterpenoids	Inula	Viridiplantae
C[C@@]1([C@H](O)CO)C=C2CC[C@H]3[C@@](C)(CCC[C@@]3(C)CO)[C@@H]2CC1	2020	New modifications	Diterpenoids	Sigesbeckia	Viridiplantae
C=C1C2=C(C(C)C)[C@@H](O)[C@@H]1/C=C1\[C@@H](CC[C@]1(O)COC)[C@@H](C)[C@@H](O)C2	2020	New modifications	Diterpenoids	Alternaria	Fungi
CC(CCC1(C(C)C)OC1C)[C@@H]1CC[C@H]2[C@@H]3[C@@H](O)CC4=CC(=O)CC[C@]4(C)[C@H]3CC[C@]12C	2020	Site combinations	Steroids	Sargassum	Others
C=C(C)[C@@H](O)[C@H]1C[C@@H]([C@@H]2CC[C@]34C[C@]23CC[C@@H]2[C@@]3(C)CC[C@H](OC(=O)CC(C)C)C(C)(C)[C@@H]3C[C@H](O)[C@]24C)[C@@H](OC)O1	2020	New modifications	Triterpenoids	Toona	Viridiplantae
CCCCC/C=C/CCC(=O)OCCC[C@H]1C(=C(C)C)CC[C@H](C)[C@]1(C)COc1ccc2ccc(=O)oc2c1	2020	New modifications	Sesquiterpenoids	Ferula	Viridiplantae
C[C@H]1CC(=O)C2=C1C[C@@H](C(C)(C)O)[C@H](C)CC2	2020	New skeletons	Sesquiterpenoids	Litsea	Viridiplantae
C=C(CC/C=C(\C)C[C@H](O)C=C(C)C)C(=O)CC/C(C)=C/CO	2020	New modifications	Diterpenoids	Bifurcaria	Others
C=C(C)[C@]12C[C@H]3[C@](C)(CC(=O)C[C@@]3(C)C[C@H]1O)O2	2020	Site combinations	Sesquiterpenoids	Dictyosporium	Fungi
CC[C@@H](C)[C@H]1C[C@]2(CC[C@]3(C(C)C)C[C@H]23)OC2=C1C(=O)C(C)(C)C(=O)C2(C)C	2020	New modifications	Meroterpenoids	Rhodomyrtus	Viridiplantae
CCO[C@@H](CC=C(C)C)c1cc(O)c2c(=O)c3c4c(O)c5c(O)ccc(O)c5c(=O)c-4c(CC=C(C)C)c=3c(=O)c2c1O	2020	New skeletons	Diterpenoids	Arnebia	Viridiplantae
C=C(C)[C@@H]1CC[C@H](C)[C@@H]2CC(=O)C(C)=C2C1	2020	New modifications	Sesquiterpenoids	Baccharis	Viridiplantae
CO[C@H]1C[C@@H]2[C@@](C)(C3=C1C(=O)N(CC(=O)O)[C@H]3OC)[C@H](O)C[C@@H]1[C@@]3(C)CCCC(C)(C)[C@@H]3CC[C@@]21C	2020	New sites	Sesterterpenoids	Hyrtios	Metazoa
CC(C)c1cc2c(cc1O)C[C@@H](O)[C@H]1C(C)(C)CCC[C@]21C	2020	New modifications	Diterpenoids	Dacrycarpus	Viridiplantae
C/C=C(/C)C(=O)O[C@H]1CC[C@]2(C)CC(=O)C[C@H]2[C@]1(C)OC(C)=O	2020	New skeletons	Sesquiterpenoids	Dobinea	Viridiplantae
C=C1CCC[C@]2(C)Cc3oc(C(C)c4oc5c(c4C)C[C@H]4C(=C)CCC[C@]4(C)C5)c(C)c3C[C@@H]12	2020	New skeletons	others	Atractylodes	Viridiplantae
CC(C)[C@]1(O)CC[C@]2(C)C=C[C@](C)(OC(=O)c3ccc(O)cc3)C[C@@H](O)[C@H]21	2020	New modifications	Sesquiterpenoids	Ferula	Viridiplantae
CC(C)C(=O)O[C@H]1CC[C@]2(C)[C@@H](COc3ccc4ccc(=O)oc4c3)[C@](C)(O)CC[C@H]2C1(C)C	2020	New modifications	Sesquiterpenoids	Ferula	Viridiplantae
C/C1=C\CC[C@]2(C)O[C@H]2C[C@@H]2C(=O)C=C(C(C)C)[C@@]2(O)CC1	2020	New sites	Diterpenoids	Casearia	Viridiplantae
C[C@H]1CC[C@]2(CO)CC[C@]3(C)C(=C[CH][C@@H]4[C@@]5(C)CC[C@@H](O)C(C)(C)[C@@H]5CC[C@]43C)[C@@H]2[C@H]1C	2020	New modifications	Triterpenoids	Rhododendron	Viridiplantae
C/C1=C\CC[C@]2(C)O[C@H]2/C=C(/C(C)(C)O)CC/C(C)=C/CC1	2020	New modifications	Diterpenoids	Sarcophyton	Viridiplantae
C/C(=C\C[C@@]1(C)[C@H]2CC[C@@]3(C)C[C@@H]2CC[C@@H]1[C@H]1CC[C@]2(O[C@@H]4[C@@H](O)[C@@H](O)[C@H](O)[C@@H](O)[C@@H]4O[C@@H]4O[C@H](CO)[C@@H](O)[C@H](O)[C@H]4O)[C@@H](O)CC[C@H]2[C@@H]13)CCO	2020	New skeletons	Triterpenoids	Panax	Viridiplantae
CC(=O)OC/C(C)=C/CC[C@@]1(C)[C@H]2CC[C@@]3(C)Oc4cc(C)cc(O)c4[C@@H]1[C@@H]23	2020	New sites	Meroterpenoids	Rhododendron	Viridiplantae
COC(=O)C1=CC[C@H](C2=CCCC(C)(C)[C@H]2O)CC1	2020	New modifications	Sesquiterpenoids	Zea	Viridiplantae
C=C1CC[C@@]2(C)[C@@H](CC[C@]3(C)[C@@H]2CC=C2[C@@H]4CC(C)(C)[C@@H]5C[C@]4(C(=O)O5)[C@H](O)C[C@]23C)C1(C)C	2020	New sites	Others	Eclipta	Viridiplantae
CC1=C(CC/C(C)=C/C(=O)O)[C@@]2(C)CCC[C@](C)(CO)[C@@H]2CC1=O	2020	New modifications	Diterpenoids	Forsythia	Viridiplantae
CC1=C(C(=O)O)[C@@H]2[C@H](C(=O)O)[C@@]1(C)CC[C@@H]2C(C)C	2020	New modifications	Sesquiterpenoids	Bipolaris	Fungi
Cc1ccc([C@]2(C)C[C@@H](O)[C@H](O)C2(C)C)cc1	2020	New modifications	Sesquiterpenoids	Trichoderma	Fungi
CC(C)[C@@]1(O)C(=O)C[C@]2(C)CC3=C(C(=O)C[C@@]3(C)O)[C@@H](C)CC[C@H]21	2020	New sites	Diterpenoids	Plagiochila	Viridiplantae
C=C1[C@H]2C3=CCC4[C@@]5(C)C[C@@H](O)[C@@H]6O[C@H](CCC(=O)OC)OC[C@@]6(C)C5CC[C@@]4(C)[C@]3(C)CC[C@@]2(C(=O)O[C@@H]2O[C@H](CO)[C@@H](O)[C@H](O)[C@H]2O)CC[C@H]1C	2020	New sites	Triterpenoids	Ilex	Viridiplantae
C=C1[C@@H](O)C[C@H]2C(C)(C)CCC[C@]2(C)[C@H]1C/C=C(/CO)[C@H](O)CO	2020	Site combinations	Diterpenoids	Artemisia	Viridiplantae
CC(C)=C/C=C/[C@](C)(O)[C@H]1CC[C@](C)(O)[C@@H]2CC[C@@](C)(O)[C@@H]2C1	2020	New modifications	Diterpenoids	Lobophytum	Metazoa
C=C1[C@@H](OC(C)=O)CC[C@]2(C)C=C3OC(=O)C(C)=C3C[C@@H]12	2020	New modifications	Sesquiterpenoids	Atractylodes	Viridiplantae
CC1(C)C[C@H]2[C@H]1CCC(=O)C[C@]2(C)CC(=O)O	2020	New skeletons	Sesquiterpenoids	Rumphella	Metazoa
CC(=O)O[C@]1(C)CC[C@@H]([C@@](C)(CCC=C(C)C)OC(C)=O)[C@@H]1C	2020	New modifications	Sesquiterpenoids	Trichoderma	Fungi
CC1(C)[C@@H]2CC[C@@](C)(O)[C@@H]3CC[C@](C)(O[C@@H]4O[C@H](CO)[C@@H](O)[C@H](O)[C@H]4O)[C@H]3[C@@H]21	2020	New modifications	Sesquiterpenoids	Syzygium	Viridiplantae
C=C1CC/C(C)=C(\C)C[C@@H](O)[C@@H](C(C)C)/C(C)=C/1C	2020	New skeletons	Sesquiterpenoids	Isolona	Viridiplantae
O=C(O)[C@H]1[C@H]2Cc3c4[nH]c5ccccc5c4cc[n+]3C[C@H]2C[C@@H](O)[C@@H]1O	2020	New modifications	Meroterpenoids	Rauvolfia	Viridiplantae
COC[C@]1(C[C@@H]2C[C@@]34C5C6CCCC(C)(C)[C@H]6[C@H](O)[C@]3(O)OCO[C@H]4[C@@]2(C)C[C@@H]5OC(C)=O)C(=O)[C@@]23[C@@H](CC[C@@H]1[C@H]2O)C12CCCC(C)(C)[C@H]1C(=O)[C@]3(O)[C@@H]2O	2020	New skeletons	Sesquiterpenoids	Isodon	Viridiplantae
C=C(C)[C@@]12OC3(/C=C/C=C/CCCCC)O[C@H]1[C@@H]1[C@H]4OC4(CO)[C@H](O)[C@]4(O)C(=O)C(C)=C[C@H]4[C@@]1(O3)[C@@H](C)[C@@H]2OC(=O)CCC	2020	New modifications	Diterpenoids	Daphne	Viridiplantae
CC1=C2CC[C@@]3(C)O[C@@H]3CC[C@](C)(OO)/C=C/C/C(C)=C/[C@@H]2OC1=O	2020	New modifications	Diterpenoids	Sarcophyton	Metazoa
CC(C)=C1C[C@@]2(O)[C@@H](CC[C@H]2C)[C@](C)(O)CC1=O	2020	New modifications	Sesquiterpenoids	Curcuma	Viridiplantae
COC(OC)[C@@H]1CC(=O)[C@@H]2C[C@H]1C2(C)C	2020	New modifications	Monoterpenoids	Myristica	Viridiplantae
CCO[C@H]1O[C@@H]([C@H](O)C(C)(C)O)C[C@H]1[C@@H]1CC=C2[C@@]1(C)CC[C@@H]1[C@@]3(C)CC[C@H](OC(=O)CC(C)C)C(C)(C)[C@@H]3C[C@H](O)[C@@]21C	2020	New modifications	Triterpenoids	Meripilus	Fungi
CC(=O)O[C@H]1CCC(C)(C)[C@@H](CO)[C@@]12COC(=O)[C@@]13C[C@@H](CC[C@H]12)[C@@H](C)C3=O	2020	New modifications	Diterpenoids	Isodon	Viridiplantae
CC(=O)O[C@@H]1C[C@H](O)[C@@]2(C)[C@@H](C[C@@H](O)[C@]3(C)[C@@H]2C(=O)C[C@@]2(C)[C@H](c4ccoc4)CC(=O)[C@H]23)C1(C)C	2020	Site combinations	Triterpenoids	Toona	Viridiplantae
C=C1C(=O)O[C@H]2C[C@H](C)C(CCC(C)=O)=CC[C@H]12	2020	New modifications	Sesquiterpenoids	Xanthium	Viridiplantae
CC1(C)C(=O)[C@@H]2C[C@@]34C[C@@H](CC[C@H]3[C@](C)(O)[C@H]2C[C@@H]1O)[C@@](O)(COC(=O)CO)C4	2020	New modifications	Diterpenoids	Pieris	Viridiplantae
C=C1CC[C@H]2[C@@](C)(C(=O)O[C@@H]3O[C@H](CO)[C@@H](O)[C@H](O)[C@H]3O)CCC[C@]2(C)[C@H]1CC/C(=C/CO)CO	2020	New modifications	Diterpenoids	Pinus	Viridiplantae
CC(=O)O[C@H]1C[C@@]2(O)[C@@H](OC(C)=O)[C@@H]3[C@@]4(CO4)[C@@H](O)C[C@H](OC(C)=O)[C@@]3(C)[C@@H](O)[C@H](OC(C)=O)C(=C1C)C2(C)C	2020	New modifications	Diterpenoids	Taxus	Viridiplantae
C=C(C)[C@H]1CC[C@@]2(C)[C@H]1CC[C@]1(C)[C@@H]2CC[C@@H]2[C@@]3(C)CC[C@H](OC(C)=O)C(C)(C)[C@@H]3CC[C@]21C	2020	New modifications	Triterpenoids	Cnidoscolus	Viridiplantae
CC[C@]12CCCN3CCC(=O)c4ccccc4N(C(=O)[C@H]31)[C@H](OC)C2	2020	New skeletons	Meroterpenoids	Bousigonia	Viridiplantae
C=C(C)[C@@H]1CC[C@]23O[C@H]2[C@H](C[C@]2(C)O[C@@H]2c2cc(C=O)c(o2)C1)OC3=O	2020	New modifications	Diterpenoids	Leptogorgia	Metazoa
C/C1=C\C=C(\C(C)C)CC[C@@](C)(O)[C@H](O)CC/C(C)=C/CC1	2020	New modifications	Diterpenoids	Sarcophyton	Metazoa
CC1(C)CCC[C@@]2(C)[C@@H]3C=C4OC(=O)C(CO)=C4[C@@H]4O[C@]43CC[C@H]12	2020	New modifications	Diterpenoids	Mikania	Viridiplantae
C/C=C1/CN2CCc3c([nH]c4ccccc34)[C@@H]2C[C@@H]1[C@H](Cc1c[n+]2c(c3[nH]c4ccccc4c13)C[C@@H]1C(C(=O)OC)=CO[C@@H](C)[C@@H]1C2)C(=O)O	2020	New skeletons	Meroterpenoids	Picralima	Viridiplantae
CC1(C)CC2C3=CCC4[C@@]5(C)CC[C@H](OC6O[C@H](CO)[C@@H](O[C@@H]7OC[C@@H](O)[C@H](O)[C@H]7O)[C@H](O)[C@H]6O[C@@H]6OC[C@@H](O[C@H]7OC[C@@H](O)[C@H](O)[C@H]7O)[C@H](O[C@@H]7O[C@H](CO)[C@@H](O)[C@H](O)[C@H]7O[C@@H]7O[C@H](CO)[C@@H](O)[C@H](O)[C@H]7O)[C@H]6O)C(C)(C)C5CC[C@@]4(C)[C@]3(C)CC[C@@]2(C(=O)O)C[C@@H]1OC(=O)/C=C/c1ccccc1	2020	Site combinations	Triterpenoids	Erythrophleum	Viridiplantae
CC1=C(CCC2=CC(O)OC2=O)[C@@]2(C)CC[C@@H](O)C(C)(C)[C@@H]2CC1=O	2020	New modifications	Diterpenoids	Rydingia	Viridiplantae
CC(=O)O[C@H]1CC2=C(/C=C\C=C\[C@@]3(C)C[C@H](c4ccoc4)OC(=O)[C@@H]13)C(=O)OC2	2020	Site combinations	Diterpenoids	Salvia	Viridiplantae
COc1cc(C(=O)OC[C@H]2O[C@@H](O[C@@H]3OC=C[C@H]4[C@H](O)[C@@H]5O[C@]5(CO)[C@@H]34)[C@H](O)[C@@H](O)[C@@H]2O)ccc1O[C@@H]1O[C@H](CO)[C@@H](O)[C@H](O)[C@H]1O	2020	New modifications	Monoterpenoids	Picrorhiza	Viridiplantae
COc1ccc(C(=O)O[C@H]2C[C@@]3(C)C(C[C@@]2(C)C=O)[C@@]24O[C@@H]2CC2[C@@]5(C)CC[C@H](O[C@@H]6OCC(O[C@@H]7O[C@H](CO)[C@@H](O)[C@H](O)[C@H]7O)[C@H](O)[C@H]6O[C@@H]6O[C@H](CO)[C@@H](O)[C@H](O)[C@H]6O)[C@@](C)(CO)C5CC[C@@]2(C)[C@]4(C)C[C@@H]3O)cc1O	2020	New sites	Triterpenoids	Avena	Viridiplantae
C=C1[C@H](O)[C@@]23CCC4[C@H](C(=O)O)C[C@@H](O)C[C@@]4(C)[C@@H]2CC[C@@H]1C3	2020	New modifications	Diterpenoids	Atractylis	Viridiplantae
CC(=O)O[C@H]1C/C=C(/C)[C@@H](O)CC/C(C)=C/C[C@]2(C(C)C)CC[C@@]1(C)O2	2020	New modifications	Diterpenoids	Boswellia	Viridiplantae
Cc1cc2c(o1)C(=O)c1cc3c(cc1C2=O)[C@@](C)(CO)CCC3	2020	New skeletons	others	Caryopteris	Viridiplantae
COC(=O)/C=C(/C)CC/C=C(\C)CC/C=C(\C)C(=O)/C=C/C(C)(C)O	2020	New modifications	Diterpenoids	Aphanamixis	Viridiplantae
CC1(C)OCC([C@@]2(C)CC[C@@H]3[C@](C)(CC[C@@H]4C(C)(C)C(=O)CC[C@]43C)O2)O1	2020	New modifications	Diterpenoids	Euphorbia	Viridiplantae
C[C@@H]1C2C3=CC=C4[C@@]5(C)C[C@@H](O)[C@H](O)[C@@](C)(CO)C5[C@H](O)C[C@@]4(C)[C@]3(C)CC[C@@]2(C(=O)O[S])CC[C@H]1C	2020	New sites	Triterpenoids	Centella	Viridiplantae
C/C=C(/C)C(=O)O[C@H]1CC[C@]2(C)CC(=O)[C@@H]([C@@H](C)C(=O)O)C[C@H]2[C@]1(C)O	2020	New modifications	Sesquiterpenoids	Syringa	Viridiplantae
CO[C@H]1O[C@@H](OC)[C@H]2C(=C1COC(=O)C(OC(=O)CC(C)C)C(C)C)C[C@@H](OC(C)=O)[C@]2(O)CCl	2020	New modifications	Monoterpenoids	Valeriana	Viridiplantae
C[C@@]1(CO)CC[C@]2(C(=O)O)CC[C@]3(C)C(=CCC4[C@@]5(C)C[C@@H](O)[C@H](O)[C@@](C)(CO)C5CC[C@]43C)[C@@H]2[C@@H]1O	2020	New sites	Triterpenoids	Ilex	Viridiplantae
CNc1ccccc1C(=O)O[C@H]1C[C@@]2(C)C(C[C@@]1(C)C=O)[C@@]1(O)C(=O)CC3[C@@]4(C)CC[C@H](O[C@@H]5OC[C@H](O[C@@H]6O[C@H](CO)[C@@H](O)[C@H](O)[C@H]6O)[C@H](O)[C@H]5O[C@@H]5O[C@H](CO)[C@@H](O)[C@H](O)[C@H]5O)[C@@](C)(CO)C4CC[C@@]3(C)[C@]1(C)C[C@@H]2O	2020	New sites	Triterpenoids	Avena	Viridiplantae
CO[C@@H]1O[C@@H](C)[C@@H]2[C@@H](O)C[C@@H]3[C@](C)([C@@H](O)C[C@H]4[C@@]3(C)CC[C@H]3C(C)(C)CCC[C@@]34COC(C)=O)[C@H]21	2020	New modifications	Sesterterpenoids	Lendenfeldia	Metazoa
CC(=O)O[C@@H]1CC[C@]2(C)C3=C(CC[C@H]2C1(C)C)[C@@]1(C)CC[C@@H]([C@@H](CCC=C(C)C)C(=O)O)[C@]1(C)CC3	2020	New modifications	Triterpenoids	Boswellia	Viridiplantae
CC(C)=C/C=C/[C@H](C)[C@H]1CC[C@]2(C)C[C@@H]3[C@](C)(O)CC(O)[C@]3(O)/C(C(=O)O)=C\C[C@@H]12	2020	Site combinations	Sesterterpenoids	Aspergillus	Fungi
CC1=C2CC[C@]3(C)O[C@H]3CC/C(C)=C/CC[C@](C)(O)/C=C/2OC1=O	2020	Site combinations	Diterpenoids	Sarcophyton	Metazoa
CC(C)[C@]12C=C[C@]3(OO1)[C@@H](CCC1C(C)(C)CCC[C@@]13C)C2	2020	New sites	Diterpenoids	Vitex	Viridiplantae
C=C(C(=O)O)[C@@H]1CC[C@@]2(C)C(=O)O[C@@H]1/C2=C(\C)C(C)=O	2020	Site combinations	Sesquiterpenoids	Artemisia	Viridiplantae
COC(=O)N1c2ccc(OC)cc2[C@]23[C@H]4CN5CCCC(CC[C@]12C(=O)O)(C4=O)[C@H]53	2020	New skeletons	Meroterpenoids	Kopsia	Viridiplantae
C/C=C(/C)C(=O)O[C@H]1CC[C@]2(C)Cc3occ(C)c3C[C@H]2[C@H]1C	2020	New modifications	Sesquiterpenoids	Syringa	Viridiplantae
C=C1[C@@H]2C[C@H](O[C@@H]3O[C@H](CO)[C@@H](O)[C@H](O)[C@H]3O)C(C)(C)[C@@]2(O)[C@H](O)C[C@]23C=C(C)[C@H](CC[C@@H]12)C3	2020	New modifications	Diterpenoids	Pieris	Viridiplantae
C=C(CC[C@H](C(=O)O)[C@H]1C[C@@H](O)[C@@]2(C)C3=C(CC[C@]12C)[C@@]1(C)CC[C@@H](O)C(C)(C)[C@@H]1CC3)C(C)C	2020	New modifications	Triterpenoids	Taiwanofungus	Fungi
COc1ccc2[nH]c3c(c2c1)C[C@H]1C(CO)[C@H]2C[C@@H]3N1[C@@H](C)[C@@H]2CO	2020	New sites	Others	Rauvolfia	Viridiplantae
C[C@@]1(O)[C@@H](O)CC[C@]2(C)[C@H]3CC[C@]4(C)CCO[C@H]4C3=C[CH][C@@H]12	2020	Site combinations	Diterpenoids	Xylaria	Fungi
CC[C@H](C)[C@H](C1=C(O)C(C)(C)C(=O)C(C)(C)C1=O)c1c(O)c(C(=O)CC(C)C)c(O)c2c1O[C@]1(C)C=C[C@@H](C(C)C)C[C@H]21	2020	New skeletons	Diterpenoids	Callistemon	Viridiplantae
CC1(C)CC2C3=CCC4[C@@]5(C)CC[C@H](O[C@H]6O[C@H](CO)[C@@H](O[C@@H]7OC[C@@H](O)[C@H](O)[C@H]7O)[C@H](O)[C@H]6O[C@@H]6OC[C@@H](O[C@H]7OC[C@@H](O)[C@H](O)[C@H]7O)[C@H](O[C@@H]7O[C@H](CO)[C@@H](O)[C@H](O)[C@H]7O[C@@H]7OC[C@@H](O)[C@H](O)[C@H]7O)[C@H]6O)C(C)(C)C5CC[C@@]4(C)[C@]3(C)CC[C@@]2(C(=O)O)C[C@@H]1OC(=O)/C=C/c1ccccc1	2020	Site combinations	Triterpenoids	Erythrophleum	Viridiplantae
CC1(C)C[C@H](O)C[C@@H]2[C@@]3(C)CC[C@](C)([C@H](O)CO)C[C@@H]3CC[C@]21O	2020	Site combinations	Diterpenoids	Zea	Viridiplantae
C=C[C@@]1(C)C=C2C=C[C@H]3[C@@](C)(COC=O)CCC[C@]3(C)[C@H]2CC1	2020	New modifications	Diterpenoids	Callicarpa	Viridiplantae
C[C@H](CC[C@H](O)C(C)(C)O)[C@@H]1CC[C@@]2(C)[C@@]1(C)CC[C@@]1(C)C3=C(C[C@H]4O[C@]412)C(C)(C)[C@H](O)CC3	2020	Site combinations	Triterpenoids	Jatropha	Viridiplantae
C=C1[C@H](O)[C@@]23CCC4[C@H](C(=O)OC)C[C@@H](O)C[C@@]4(C)[C@@H]2CC[C@@H]1C3	2020	New modifications	Diterpenoids	Atractylis	Viridiplantae
C=C(C(=O)OC)[C@@H]1[C@@H](OC(=O)C(C)CC)C[C@]2(C)[C@H](C(C)=CC[C@H]2O)[C@H]1O	2020	New modifications	Sesquiterpenoids	Artemisia	Viridiplantae
C=CC1=C(C)C[C@H]2[C@@H](CC[C@H]3C(C)(C)CCC[C@]23C)C1=O	2020	New sites	Diterpenoids	Eragrostis	Viridiplantae
COC(=O)/C(=C/[C@H]1[C@H](C(=O)OC)[C@](O)(CCl)CC[C@@H]1C(C)C)CO	2020	New modifications	Sesquiterpenoids	Trichoderma	Fungi
CC(=O)CC[C@@]1(C(C)C)CCC(=O)O1	2020	New modifications	Others	Populus	Viridiplantae
CC(=O)O[C@@H]1C[C@H](OC(=O)c2ccccc2)[C@]2(C)C3CC[C@]4(C)C(=CC[C@H]4[C@@H]4COC(=O)C4)[C@]3(C)[C@H](O)[C@@H]3OC[C@@]1(C)[C@H]32	2020	New modifications	Triterpenoids	Melia	Viridiplantae
CC1O[C@@H](O[C@H]2C(O)[C@H](O)CO[C@H]2O[C@H]2CC[C@@]3(C)C(CC[C@]4(C)C3CC=C3[C@@H]5CC(C)(C)CC[C@]5(C(=O)O[C@@H]5OC(CO[C@@H]6OC(CO)[C@@H](O)C(O)[C@@H]6O)[C@@H](O)C(O)[C@@H]5O)CC[C@]34C)[C@]2(C)CO)C(O)[C@@H](O[C@@H]2OC[C@@H](O)C(O[C@@H]3OC(C)[C@H](OC4OC(CO)C(OC5OC(CO)C(O)[C@H](O)[C@@H]5O)[C@@H](O[C@@H]5OC(C)C(O)[C@H](O)[C@@H]5O)[C@@H]4O)[C@H](O)C3O)[C@@H]2O)C1O	2020	New modifications	Triterpenoids	Scabiosa	Viridiplantae
CC(C)C1=CCC2=C(CC[C@@H]3[C@]2(C)CCC[C@@]3(C)CO)C1	2020	New modifications	Diterpenoids	Tripterygium	Viridiplantae
C=C(C)[C@H]1CC[C@]2(C(=O)O)CC[C@]3(C)[C@H](CC[C@@H]4[C@@]5(C)C[C@H](O)[C@@H](O)C(C)(C)[C@@H]5CC[C@]43C)[C@@H]12	2020	New modifications	Triterpenoids	Colubrina	Viridiplantae
CC1C[C@@H]2c3c(coc3C1=O)CC[C@H]2C(C)C	2020	Site combinations	Sesquiterpenoids	Talipariti	Viridiplantae
C=C1C[C@H](OC(C)=O)[C@]2(C)CC[C@]3(C)[C@H]4[C@H](O)[C@@H](O)[C@@]5(CO)[C@@H](C[C@@H](O)[C@H](OC(C)=O)[C@@H]5C)[C@]4(C)CC[C@@]3(C(=O)OC)[C@]2(O)C1	2020	New sites	Triterpenoids	Galphimia	Viridiplantae
C/C(=C\CO)CC1=C(CC(=O)O)[C@]2(C)CCC[C@@](C)(CO)[C@H]2CC1	2020	New skeletons	Diterpenoids	Diaporthe	Fungi
CC1(C)[C@@H]2CC[C@@]1(COC(=O)c1ccccc1)[C@@H](O)C2	2020	New modifications	Monoterpenoids	Myristica	Viridiplantae
C=C(C)[C@H]1C[C@@H](O)[C@H](C)[C@H]2CCC(C(=O)O)=C[C@H]12	2020	New sites	Sesquiterpenoids	Myristica	Viridiplantae
C/C=C\C(=O)OC1CC2C[C@H](OC(=O)/C=C\C)[C@]1(C)[C@@]1(C)CC(=O)C(C)=C[C@H]1O2	2020	New skeletons	Sesquiterpenoids	Alternaria	Fungi
CCN1C[C@@]2(COC)C3[C@@H](OC)C4C1C3([C@@H](OC)C[C@H]2O)[C@@H]1C[C@]2(O)[C@@H](OC)C[C@@]4(OC)[C@H]1[C@H]2O	2020	Site combinations	Diterpenoids	Aconitum	Viridiplantae
CO[C@H]1C=C2[C@@H]3[C@@H](C)[C@@H](C)CC[C@]3(C)CC[C@@]2(C)[C@]2(C)CC[C@H]3C(C)(C)[C@H](O)CC[C@]3(C)[C@@H]12	2020	New modifications	Triterpenoids	Rhododendron	Viridiplantae
C=C(C)[C@@H](O)CC/C(C)=C1\CC[C@](C)(Cl)[C@@H](Br)C1	2020	New modifications	Sesquiterpenoids	Laurencia	Others
CC1=C(C)[C@H](C[C@@H](C)[C@H]2CC[C@@]3(C)C4=C(C[C@@H](O)[C@]23C)[C@@]2(C)CC[C@@H](O)C(C)(C)[C@@H]2CC4)OC1=O	2020	New modifications	Triterpenoids	Heritiera	Viridiplantae
C[C@@]1(O)C2=CC(=O)O[C@@H]2C[C@H]2[C@H]1CC[C@H]1[C@](C)(C(=O)O)CCC[C@]21C	2020	Site combinations	Diterpenoids	Erythrophleum	Viridiplantae
CC1=CCC2C(C)(C)CCC[C@]2(C)[C@H]1CC[C@@](C)(O)[C@@H](O)CO	2020	New modifications	Diterpenoids	Madia	Viridiplantae
Cc1cc(C)c2c(c1O)C(=O)O[C@@H]1[C@@H](C)CC(=O)O[C@H]21	2020	New skeletons	Meroterpenoids	Ganoderma	Fungi
CC(=O)OC[C@H]1[C@H]2C(COC(=O)CO)=C(C)[C@]1(C)CC[C@@H]2C(C)C	2020	New modifications	Sesquiterpenoids	Bipolaris	Fungi
COC(=O)C(O)[C@H]1[C@]2(C)C[C@]3(O)[C@](OC(C)=O)([C@H]2OC(C)=O)[C@H]2OC4(C)O[C@@]5(C[C@H](O)[C@]6(C)C(=CC(=O)O[C@H]6c6ccoc6)[C@@]25O4)[C@]13C	2020	New modifications	Triterpenoids	Xylocarpus	Viridiplantae
CC(=O)C=C=C1C(C)(C)C[C@@H](O)C[C@@]1(C)O[C@H]1OC(CO)[C@@H](O)C(O)[C@H]1O	2020	New modifications	Others	Solanum	Viridiplantae
CC(=O)C[C@H]1CC[C@]2(C)c3ccc(C(C)C)cc3C[C@@H]3OC(=O)[C@@]1(C)C32	2020	New skeletons	Others	Phalaris	Viridiplantae
C[C@H]1C[C@H]2CC[C@]1(C)C2(C)CO	2020	Site combinations	Monoterpenoids	Aristolochia	Viridiplantae
C=C(CC[C@H](C)[C@H]1CC[C@H]2C3=CC[C@H]4[C@@H](C)C(=O)CC[C@]4(C)C3=C[CH][C@@]21C)C(C)C	2020	New modifications	Steroids	Taiwanofungus	Fungi
C=C1C(=O)[C@@]23CC[C@@H]4[C@@](C)(C(=O)O)CCC[C@@]4(C)[C@@H]2CC[C@@H]1[C@H]3OC(C)=O	2020	New skeletons	Sesquiterpenoids	Isodon	Viridiplantae
COc1ccc(C(=O)O[C@]2(C)CCC3=C(C(C)C)C(=O)C[C@]3(C)CC2=O)cc1	2020	New skeletons	Sesquiterpenoids	Ferula	Viridiplantae
C[C@@H]1C2=CC(=O)O[C@]2(O)C[C@H]2[C@H]1[C@H](O)[C@H](OC(=O)c1ccccc1)[C@@]1(O)C(C)(C)[CH]CC[C@]21C	2020	New modifications	Diterpenoids	Caesalpinia	Viridiplantae
C=C1CO[C@]2(CO)C(C)=C3[C@@H](O)C[C@H](C)[C@@H]3C[C@H]12	2020	New skeletons	Sesquiterpenoids	Daphne	Viridiplantae
CC1=C[C@]23C[C@H]1CC[C@H]2[C@]1(C)CC[C@@H](O)C(C)(C)[C@H]1C[C@@H]3O	2020	Site combinations	Diterpenoids	Sideritis	Viridiplantae
C=C(C)[C@]1(O)[C@H](OC(=O)c2ccccc2)[C@@H](C)[C@@]2(O)[C@H]([C@@H]3O[C@@]3(CO)[C@@H](O)[C@@]3(O)C(=O)C(C)=C[C@@H]32)[C@H]1OC(=O)/C=C/C=C/CCCCC	2020	New modifications	Diterpenoids	Daphne	Viridiplantae
C=C1[C@@H]2CC(=O)c3cc(C(C)C)c(O)cc3[C@@]2(C)CC[C@]1(C)O	2020	Site combinations	Diterpenoids	Selaginella	Viridiplantae
C[C@H](C[C@@H](O)[C@@H](O[C@@H]1O[C@H](CO)[C@@H](O)[C@H](O)[C@H]1O)C(C)(C)O)[C@H]1CC[C@@]2(C)[C@@H]3CC[C@H]4[C@@]5(C)CO[C@@H]6O[C@@H](C(O)[C@@H]7[C@H](O[C@H]5CC[C@@]45C[C@@]35CC[C@]12C)O[C@H](CO)[C@@H](O)[C@@H]7O)[C@H](O)[C@H](O)[C@H]6O	2020	Site combinations	Triterpenoids	Asplenium	Viridiplantae
C[C@H](CO)[C@H]1C[C@H](O)[C@@]2(C)C3=C(C(=O)C[C@]12C)[C@@]1(C)CC[C@H](O)C(C)(C)[C@@H]1C[C@@H]3O	2020	New modifications	Triterpenoids	Ganoderma	Fungi
C=C1/C=C/[C@H](C(C)C)[C@@H](O)C/C(C)=C/CC1	2020	New modifications	Sesquiterpenoids	Isolona	Viridiplantae
CC1=C(CCc2ccoc2)[C@]2(C)CCC(=O)C(C)(C)[C@H]2[C@@H](O)C1=O	2020	New modifications	Diterpenoids	Leonurus	Viridiplantae
COCC1=CC[C@]2(C)C[C@@H](O)[C@](O)(C(C)C)[C@H]2CC1	2020	New skeletons	Sesquiterpenoids	Trichoderma	Fungi
CC(=O)C1=CC(=O)[C@@]2(C)[C@]34O[C@H]3C[C@H]3C(C)(C)C(=O)CC[C@]3(C)C4=CC(=O)[C@]12C	2020	New sites	Triterpenoids	Ganoderma	Fungi
CC(C)C[C@@H]1C[C@@]2(CC[C@@H]3[C@H]([C@@H]4[C@H](C)CC[C@H]42)C3(C)C)OC2=C1C(=O)C(C)(C)C(=O)C2(C)C	2020	New modifications	Meroterpenoids	Rhodomyrtus	Viridiplantae
CC(=O)O[C@@H]1C/C=C(/C)[C@@H](O)CC/C(C)=C/C[C@]2(C(C)C)CC[C@@]1(C)O2	2020	New modifications	Diterpenoids	Boswellia	Viridiplantae
C[C@@H]1CC[C@@]2(O)C[C@H]3[C@]4(C)CC[C@@H]4[C@@](C)(O)CC[C@]31C2(C)C	2020	New sites	Diterpenoids	Trichoderma	Fungi
COC(=O)/C=C(\C)CC[C@@]1(C)[C@H](C)C[C@H](OC(C)=O)[C@]2(COC(C)=O)[C@@H]1CCC[C@]21CO1	2020	Site combinations	Diterpenoids	Ajuga	Viridiplantae
C=C1CC[C@H]2[C@@]3(C)CC[C@H](O)C(C)(C)O[C@@H]3CC[C@]2(C)[C@@H]1Cc1c(O)c(C)c(C)oc1=O	2020	New modifications	Meroterpenoids	Aspergillus	Fungi
C/C(=C\CC/C(C)=C/CC/C(C)=C/Cc1c(O)cc(C)cc1O)CO	2020	Site combinations	Meroterpenoids	Rhododendron	Viridiplantae
C=C(C)[C@@H]1CC[C@@]2(C)[C@H](O)C[C@H](O)[C@H](C)[C@]2(O)C1	2020	New modifications	Sesquiterpenoids	Datura	Viridiplantae
CC(=O)O[C@@H]1C[C@@](C)([C@H]2OC(=O)C[C@@H]2CO)C2=CC(=O)O[C@@H]3C[C@@H]4[C@](C)(C(=O)C=C[C@@]4(C)CO)[C@@H]1[C@]23C[C]=O	2020	New skeletons	Others	Eurycoma	Viridiplantae
C=CC(C)(O)CCC(O)C1(C)CC(O)C(C(C)(C)O)O1	2020	Site combinations	Sesquiterpenoids	Solanum	Viridiplantae
CCCCC/C=C\C/C=C\CCCCCCCC(=O)O/C(=C\Cc1c(OC)cc(COC(=O)CCCCCCCCCCCCCC)c(C=O)c1O)CC(C)C=C(C)C	2020	New modifications	Sesquiterpenoids	Hericium	Fungi
CC1=CC(=O)O[C@@H](/C=C(\C)[C@@H](O)CC[C@@H](C)C2=CC(=O)C(C)(C)O2)C1	2020	New modifications	Diterpenoids	Aphanamixis	Viridiplantae
CC1(C)CC[C@]2(C(=O)O[C@H]3O[C@H](CO)[C@@H](O)[C@H](O)[C@H]3O)CC[C@]3(C)C(=CCC4[C@@]5(C)C[C@@H](O)[C@H](O[C@H]6O[C@H](COC(=O)c7cc(O)c(O)c(O)c7)[C@@H](O)[C@H](O)[C@H]6O)[C@](C)(C(=O)O)C5CC[C@]43C)[C@@H]2[C@@H]1O	2020	New sites	Triterpenoids	Quercus	Viridiplantae
CC(C)=CCC/C(C)=C/CC/C(C)=C/CC/C=C(\C)CC/C=C(\C)CCC=C(C)C	2020	New modifications	Triterpenoids	Colubrina	Viridiplantae
COc1cc(OC)c(C(=O)C[C@@]2(C)CC/C=C(\C)CC/C(C(C)C)=C\[C@@H]2C(=O)c2ccccc2)c(O)c1C	2020	New skeletons	Sesquiterpenoids	Leptospermum	Viridiplantae
CC(C(O)CC(O)C(C)(C)O)C1CCC2C1CCC1C3CC[C@H](O)CC3CCC12	2020	New sites	Steroids	Inonotus	Fungi
CO[C@H]1C[C@@H]2[C@@](C)(C3=C1C(=O)N(CC(=O)O)[C@H]3O)[C@H](OC(C)=O)C[C@@H]1[C@@]3(C)CCCC(C)(C)[C@@H]3CC[C@@]21C	2020	New sites	Sesterterpenoids	Hyrtios	Metazoa
CC(=O)O[C@@H]1C/C=C(\C)[C@@H](O)CC/C(C)=C/C[C@]2(C(C)C)CC[C@@]1(C)O2	2020	New modifications	Diterpenoids	Boswellia	Viridiplantae
COC(=O)C(O)[C@H]1C(C)(C)[C@H](OC(C)=O)[C@]2(O)C[C@]3(O)C4=CC(=O)O[C@@H](c5ccoc5)[C@]4(C)CC[C@@H]3[C@@]1(C)C2=O	2020	New modifications	Triterpenoids	Xylocarpus	Viridiplantae
CO[C@@H]1OC(=O)C=C1CC[C@@]1(C)C2=CCC[C@@](C)(CCC=C(C)C)[C@@H]2CC[C@H]1C	2020	Site combinations	Sesterterpenoids	Dactylospongia	Metazoa
C[C@H]1CC[C@@H](O)[C@]2(C)CCC(=O)C=C12	2020	New modifications	Sesquiterpenoids	Artabotrys	Viridiplantae
COC(=O)C1=CO[C@@H](O[C@@H]2O[C@H](CO[C@]3(CO)OC[C@@H](O)[C@@H](O)[C@@H]3O)[C@@H](O)[C@H](O)[C@H]2O)[C@@H]2[C@H](C)O[C@H](OC)C[C@H]12	2020	New modifications	Monoterpenoids	Cornus	Viridiplantae
CC(C)c1cc2c(cc1O)C(=O)[C@@H](O)[C@H]1C(C)(C)CCC[C@]21C	2020	New modifications	Diterpenoids	Dacrycarpus	Viridiplantae
CC1=C2CC[C@@]3(C)O[C@@H]3CC[C@](C)(O)/C=C/C/C(C)=C/[C@@H]2OC1=O	2020	New modifications	Diterpenoids	Sarcophyton	Metazoa
C/C1=C\CC[C@](C)(O)/C=C\C[C@@]2(C)OC(C)(C)[C@H](CC1)C[C@@H]2O	2020	New modifications	Diterpenoids	Lobophytum	Metazoa
C=C[C@@]1(C)CC[C@H]2C(=CC[C@H]3[C@@](C)(CO)CCC[C@]23C)C1	2020	New modifications	Diterpenoids	Calceolaria	Viridiplantae
C=C(CC[C@H](C)[C@H]1CC[C@H]2C3=C(C(=O)C[C@@]21C)[C@@]1(C)CC[C@H](O)[C@](C)(O)[C@@H]1C[C@H]3O)[C@@H](C)C(=O)O	2020	New modifications	Steroids	Taiwanofungus	Fungi
CC1O[C@@H](O[C@H]2C(O)[C@@H](O)CO[C@H]2O[C@H]2CC[C@@]3(C)C(CC[C@]4(C)C3CC=C3[C@@H]5CC(C)(C)CC[C@]5(C(=O)O[C@@H]5OC(CO[C@@H]6OC(CO)[C@@H](O)C(O)[C@@H]6O)[C@@H](O)C(O)[C@@H]5O)CC[C@]34C)C2(C)C)C(O)[C@@H](O[C@@H]2OC[C@@H](O)C(O[C@@H]3OC(C)[C@H](OC4OC(CO)C(OC5OC(CO)C(O)[C@H](O)[C@@H]5O)[C@@H](O[C@@H]5OC(C)C(O)[C@H](O)[C@@H]5O)[C@@H]4O)[C@H](O)C3O)[C@@H]2O)C1O	2020	New modifications	Triterpenoids	Scabiosa	Viridiplantae
C/C1=C\C[C@]2(C(C)C)CC[C@@](C)(O2)C2CCC(C)(O2)C(O)CC1	2020	New modifications	Diterpenoids	Boswellia	Viridiplantae
C=C1[C@@H](OC(C)=O)[C@H]2[C@@H](OC(C)=O)[C@@H](C)C[C@]2(OC(C)=O)C(=O)[C@@H](C)[C@H](O)[C@@H](O)C(C)(C)[C@@H](OC(=O)c2cccnc2)C[C@H]1OC(C)=O	2020	New modifications	Diterpenoids	Euphorbia	Viridiplantae
C[C@@H]1Oc2c(O)c3c(c(O)c2[C@H]1O)C(=O)C[C@H]1C(C)(C)CCC[C@]31C	2020	Site combinations	Diterpenoids	Caryopteris	Viridiplantae
CC(=O)OC[C@@]1(C)[C@H](O)CC[C@]2(C)[C@H]3CC[C@H]4C(=CC(=O)[C@H]5C(C)(C)[C@H](O)[C@H](O)C[C@]45C)C[C@]3(C)CC[C@@H]12	2020	New modifications	Triterpenoids	Diphasiastrum	Viridiplantae
CC(=O)O[C@H]1CC/C(C)=C\[C@@H]2OC(=O)C(C)C2[C@@H](OC(C)=O)[C@@H]2[C@]1(C)[C@@H](OC(C)=O)CC[C@]21CO1	2020	New modifications	Diterpenoids	Junceella	Metazoa
CO[C@@]12C[C@H]3[C@H]([C@H](C)C1=CC(=O)O2)[C@H](O)[C@H](OC(=O)C=Cc1ccccc1)[C@@]1(O)C(C)(C)[CH]CC[C@]31C	2020	New modifications	Diterpenoids	Caesalpinia	Viridiplantae
C=C[C@@]1(C)CCC2=C(C1)C(=O)C[C@@H]1[C@]2(C)C[C@@H](OC(C)=O)C[C@@]1(C)CO	2020	New modifications	Diterpenoids	Caesalpinia	Viridiplantae
CC1O[C@@H](O[C@H]2C(O)[C@H](O)CO[C@H]2O[C@H]2CC[C@@]3(C)C(CC[C@]4(C)C3CC=C3[C@@H]5CC(C)(C)CC[C@]5(C(=O)O[C@@H]5OC(CO[C@@H]6OC(CO)[C@@H](O)C(O)[C@@H]6O)[C@@H](O)C(O)[C@@H]5O)CC[C@]34C)C2(C)C)C(O)[C@@H](O[C@@H]2OC(CO)[C@@H](O)C(O[C@@H]3OC(C)C(OC4OC(CO)C(O)[C@@H](O[C@@H]5OC(C)C(O)[C@H](O)[C@@H]5O)[C@@H]4O)[C@H](O)[C@@H]3O)[C@@H]2O)C1O	2020	New modifications	Triterpenoids	Scabiosa	Viridiplantae
C[C@@H]1C(=O)C[C@H]2C(C)(C)[C@H](O)CC[C@]2(C)[C@@]1(O)CCc1ccoc1	2020	New modifications	Diterpenoids	Rydingia	Viridiplantae
CO[C@@H]1C[C@H]2[C@H](OC(=O)[C@@H]3COC(=O)C4=C(C)CC[C@@H]43)[C@@H]3O[C@]3(C)[C@H]2[C@H](O[C@@H]2O[C@H](CO)[C@H](O)[C@H](O)C2O)O1	2020	New modifications	Monoterpenoids	Linaria	Metazoa
C=C[C@](O)(CC[C@@H]1C(=C)CC[C@@H]2C(C)(C)[C@H](O)CC[C@]21C)COC(=O)CO	2020	New modifications	Diterpenoids	Pieris	Viridiplantae
C=C1CC23CC4C5[C@]67C[C@H](OC(=O)C(C)CC)C[C@@]5(C)CN4C6[C@]2(O)[C@H](O)C1[C@H](O)C37	2020	New modifications	Diterpenoids	Aconitum	Viridiplantae
C=C[C@@]1(C)CC[C@@H]2C(CC[C@H]3[C@@]2(C)CC[C@H](OC(C)=O)[C@@]3(C)COC(C)=O)C1	2020	New modifications	Diterpenoids	Phalaris	Viridiplantae
C=C(C)[C@@]12OC3(/C=C/C=C/CCCCC)O[C@H]1[C@@H]1[C@H]4OC4(CO)[C@H](O)[C@]4(O)C(=O)C(C)=C[C@H]4[C@@]1(O3)[C@@H](C)[C@@H]2OC(=O)CCCCC	2020	New modifications	Diterpenoids	Daphne	Viridiplantae
C/C=C(\C)C(=O)O[C@@H]1C[C@@]2(C)C3C=C[C@H]4C(C)(C)[C@@H](N(C)C)CC[C@@]45C[C@@]35CC[C@]2(C)[C@H]1[C@H](C)NC	2020	New modifications	Triterpenoids	Buxus	Viridiplantae
C=C1[C@H](OC(=O)c2ccccc2)[C@@H](OC(=O)/C=C/c2cccc3c2OCO3)C(=O)C(C)(C)[C@@H]2O[C@H]2[C@H](C)C(=O)[C@]2(OC(C)=O)[C@@H]([C@H]1OC(=O)c1ccccc1)[C@@H](OC(C)=O)[C@](C)(O)[C@@H]2O/C=C/c1ccc2c(c1)OCO2	2020	New modifications	Diterpenoids	Euphorbia	Viridiplantae
CC1(C)CCC(=O)c2c1oc1cc(O)ccc21	2020	New sites	Others	Zea	Viridiplantae
CC(=O)O[C@@H]1CC[C@]2(C)O[C@@H]2CC(=O)/C(C)=C/C[C@]2(C(C)C)CC[C@@]1(C)O2	2020	New modifications	Diterpenoids	Boswellia	Viridiplantae
C=Cc1c(C)c(O)cc2c1CC[C@@H]1C(C)(C)[C@H](O)C(=O)C[C@@]21C	2020	New modifications	Diterpenoids	Aspidopterys	Viridiplantae
CC(=O)O[C@]12C[C@@](C)(OC(=O)c3ccccc3)[C@H](O)[C@@H]1[C@H](O)C1=CC(=O)[C@](O)([C@@H]1O)C(C)(C)/C=C/[C@H](C)C2=O	2020	New sites	Diterpenoids	Euphorbia	Viridiplantae
COc1cc(C(=O)O[C@H]2C3C=CO[C@@H](O[C@@H]4O[C@H](CO[C@@H]5C[C@H]6[C@H](O)[C@@H]7O[C@]7(CO)[C@H]6[C@H](O[C@@H]6O[C@H](COC(=O)/C=C/c7ccccc7)[C@@H](O)C6(O)O)O5)[C@@H](O)C4(O)O)[C@@H]3[C@@]3(CO)O[C@@H]23)ccc1O	2020	New modifications	Monoterpenoids	Picrorhiza	Viridiplantae
CC(=O)O[C@@H](CC1=C(O)C(=O)OC1)[C@]1(C)[C@H]2CCC=C(C)[C@]2(C)[C@@H](OC(=O)c2ccccc2)[C@H](OC(=O)c2ccccc2)[C@]1(C)O	2020	New modifications	Diterpenoids	Scutellaria	Viridiplantae
CC1=CC[C@@]2(CC1=O)[C@H](C(C)C)[C@@H](O)C[C@H]2C	2020	New modifications	Sesquiterpenoids	Daphne	Viridiplantae
CO[C@@H]1C[C@@]2(C(C)=O)CCCN3CCc4c(n1c1ccccc41)[C@H]32	2020	New skeletons	Diterpenoids	Kopsia	Viridiplantae
CO[C@H]1C=C2[C@@H](C)[C@@H]3[C@H](O)[C@H](OC(=O)c4ccccc4)[C@@]4(O)C(C)(C)CCC[C@]4(C)[C@H]3C[C@@]2(OC)O1	2020	New modifications	Diterpenoids	Caesalpinia	Viridiplantae
CC(C)CC(=O)CC(C)[C@H]1C=C[C@@](O)(CO)CC1	2020	New modifications	Sesquiterpenoids	Curcuma	Viridiplantae
CC1=C2C[C@]3(C)[C@@H](C)CC[C@@H](O)[C@]3(O)C[C@@H]2OC1=O	2020	New modifications	Sesquiterpenoids	Ligularia	Viridiplantae
C[C@@H]1C2=C3C(=O)[C@@H](O)[C@@H]4[C@@]5(C)CC[C@H](O)[C@@](C)(C(=O)O)[C@@H]5CC[C@@]4(C)[C@]3(C)CC[C@@]2(C)C(=O)C[C@H]1C	2020	New sites	Triterpenoids	Scutellaria	Viridiplantae
CC1(C)CC[C@]2(C(=O)O)CC[C@]3(C)C(=CC[C@@H]4[C@@]5(C)CC[C@H](OCC6OC[C@H](O)[C@H](O)[C@@H]6O)[C@@](C)(CO)[C@@H]5CC[C@]43C)[C@@H]2C1	2020	New sites	Triterpenoids	Akebia	Viridiplantae
C=C1C[C@]23C[C@H]1CC[C@H]2[C@]1(C)CC[C@@H](OC(C)=O)C(C)(C)[C@H]1C[C@@H]3O	2020	Site combinations	Diterpenoids	Sideritis	Viridiplantae
C[C@@H]1O[C@@H](O[C@@H]2[C@@H](O[C@@H]3OC[C@H](O)[C@H](O)[C@H]3O)[C@H](O)[C@@H](CO)O[C@H]2OC2CC[C@@]3(C)C(CC[C@]4(C)C3CC=C3C5C[C@](C)(O)CC[C@]5(C(=O)O[C@@H]5O[C@H](CO)[C@@H](O)C5(O)O)CCC34C)C2(C)C)[C@H](O)[C@H](O)[C@H]1O	2020	New sites	Triterpenoids	Stauntonia	Viridiplantae
CC1(C)C[C@H]2C3=CC[C@@H]4[C@@]5(C)CC[C@H](O[C@@H]6O[C@H](C(=O)O)[C@@H](O)[C@H](O)[C@H]6O)C(C)(C)[C@@H]5CC[C@@]4(C)[C@]3(C)C[C@@H](O)[C@@]2(CO)[C@H](O[C@@H]2OC[C@@H](O)[C@H](O)[C@H]2O)C1	2020	New modifications	Triterpenoids	Impatiens	Viridiplantae
CC(=O)OC1C2C3C(C3C1(C)CO)C1C(O)CCCC12C	2020	New skeletons	Sesquiterpenoids	Botrytis	Fungi
CC(=O)C1=CC[C@H]2[C@]3(C)CC[C@H]4C(C)(C)CCC[C@]4(C(=O)O)[C@H]3CC(=O)[C@]2(C)[C@H]1C=O	2020	New modifications	Sesterterpenoids	Lendenfeldia	Metazoa
CC(=O)OC/C(C)=C/CC[C@@]1(C)[C@H]2c3c(O)cc(C)cc3O[C@@]3(C)CC[C@@H]1[C@@H]23	2020	New sites	Meroterpenoids	Rhododendron	Viridiplantae
CC1=C2C(=O)C[C@@]2(C)[C@@H]2C[C@@H]3[C@@H](O)C[C@@H](C)[C@@]2(CC1)C3(C)C	2020	New modifications	Diterpenoids	Trichoderma	Fungi
CCCCCCCC/C=C\CCCCCCCC(=O)O/C(=C\Cc1c(OC)cc(COC(=O)CCCCCCCCCCCCCC)c(C=O)c1O)CC(C)C=C(C)C	2020	New modifications	Sesquiterpenoids	Hericium	Fungi
COCC1=C2[C@@H](CC1)[C@@H](C)[C@@H](O)CC1=C(C(C)C)CC[C@]1(C)[C@H]2O	2020	New sites	Diterpenoids	Alternaria	Fungi
CC(C)[C@H]1CC[C@]2(C)CC[C@]3(CO)C(=CC[C@@H]4[C@@]5(C)CC[C@@H](O)C(C)(C)[C@@H]5CC[C@]43C)[C@@H]12	2020	New modifications	Triterpenoids	Rhododendron	Viridiplantae
CC1(C)CCC[C@]2(C)C3=C(CC[C@@H]12)C(=O)NC3=O	2020	New modifications	Sesquiterpenoids	Undefined	Others
CCO[C@@H]1C=C(CC[C@@]2(C)[C@H](C)CC[C@@]3(C)C(C(=O)O)=CCC[C@H]23)C(=O)O1	2020	New modifications	Diterpenoids	Callicarpa	Viridiplantae
COC1=CC(=O)C2=C(C=CC(C)(CC[C@@]3(C)CCC=C(C)[C@@H]3C)O2)C1=O	2020	New modifications	Meroterpenoids	Spongia	Metazoa
CC(C)=C/C=C\[C@H](C)[C@H]1CC[C@]2(C)C[C@@H]3C(C)=CC(=O)/C3=C(\C(=O)O)[C@@H](O)C[C@@H]12	2020	New modifications	Sesterterpenoids	Aspergillus	Fungi
COC(=O)C(OC(C)=O)[C@H]1C(C)(C)[C@H](O)[C@]2(O)C[C@]3(O)C4=CC(=O)O[C@@H](c5ccoc5)[C@]4(C)CC[C@@H]3[C@@]1(C)C2=O	2020	New modifications	Triterpenoids	Xylocarpus	Viridiplantae
Cc1ccc(C2=CC(O)=CC(C)(C)OC2=O)cc1	2020	New modifications	Sesquiterpenoids	Conyza	Viridiplantae
C[C@@]1([C@@H](O)CO)C=C2CC[C@@H]3[C@@](C)(CCC(=O)[C@@]3(C)CO)[C@@H]2CC1	2020	New modifications	Diterpenoids	Sigesbeckia	Viridiplantae
C=C1C(=O)O[C@@H]2[C@@H]3C(=C(C)C[C@H](OC(=O)CC(C)C)[C@@H]12)C[C@H](O)[C@]3(C)O	2020	New modifications	Sesquiterpenoids	Artemisia	Viridiplantae
CC(C)C1=C2C[C@H](O)[C@H](C)[C@@H]3CCC(=O)/C3=C/[C@@]2(C)[C@@H](O)C1	2020	New sites	Diterpenoids	Alternaria	Fungi
CC(C)=C(CC/C(C)=C/COc1ccc2ccc(=O)oc2c1)[C@@H](C)CCCO	2020	New skeletons	Sesquiterpenoids	Ferula	Viridiplantae
CC(=O)CC[C@@H](C(C)C)[C@@H]1[C@H]2C[C@@](O)(CO)C[C@H]21	2020	New skeletons	Sesquiterpenoids	Echinacea	Viridiplantae
C[C@@H](CC(=O)C[C@@H](C)[C@H]1C[C@@H](O)[C@@]2(C)C3=C(C(=O)C[C@]12C)[C@@]1(C)CCC(=O)C(C)(C)[C@@H]1CC3=O)C(=O)O[C@@H](CC[C@@H](C)[C@H]1CC[C@@]2(C)C3=CC[C@H]4C(C)(C)C(=O)CC[C@]4(C)C3=CC[C@]12C)[C@](C)(O)CO	2020	New modifications	Triterpenoids	Ganoderma	Fungi
C=C[C@]1(C)C=C2C(=O)C[C@H]3C(C)(C)CCC[C@]3(C(=O)O[C@@H]3C(=O)C=C(OC)[C@@H](O)[C@H]3O)[C@@]2(O)CC1	2020	New modifications	Diterpenoids	Undefined	Others
C=C[C@@]1(C)C=C2CC[C@@H]3C(C)(C)[C@H](O)[C@H](O)C[C@@]3(C)[C@@H]2C(=O)C1	2020	New modifications	Diterpenoids	Excoecaria	Viridiplantae
COc1cc(OC)c(C(=O)C[C@]2(C)CCC3=C([C@@H](C(C)C)CC[C@@H]3C)[C@@H]2C(=O)c2ccccc2)c(O)c1C	2020	New skeletons	Sesquiterpenoids	Leptospermum	Viridiplantae
C=C(C)[C@@]12OC3(/C=C/C=C/C=C/CCC)O[C@H]1[C@@H]1[C@H]4OC4(CO)[C@H](O)[C@]4(O)C(=O)C(C)=C[C@H]4[C@@]1(O3)[C@@H](C)[C@@H]2OC(C)=O	2020	New modifications	Diterpenoids	Daphne	Viridiplantae
C/C=C(/C)C(=O)O[C@H]1CC[C@]2(C)C[C@@H]3OC(=O)C(C)=C3C[C@H]2[C@]1(C)OC(C)=O	2020	New modifications	Sesquiterpenoids	Syringa	Viridiplantae
CC1(C)C(=O)CC[C@@]2(C)C1CC=C1C(=O)OC[C@@H]12	2020	New modifications	Sesquiterpenoids	Inonotus	Fungi
C=C/C(C)=C/C[C@H]1C(=C)CC[C@H]2[C@@](C)(COC(=O)CC(=O)O)CCC[C@]12C	2020	New modifications	Diterpenoids	Salvia	Viridiplantae
C=CC1(C)CCC2C(C(=O)O)(CC(OC(C)=O)C3C(C)(C)CCCC32C)O1	2020	New modifications	Diterpenoids	Heteroscyphus	Viridiplantae
C=C1CCCC(C)(C)C1CC/C(C)=C\CCc1ccoc1	2020	New modifications	Diterpenoids	Dendrilla	Metazoa
COC(=O)[C@@H](CO)[C@@H]1[C@H](C(=O)O)[C@@](C)(O)C[C@H]1O	2020	New modifications	Monoterpenoids	Morinda	Viridiplantae
Cc1cc([C@]23OC[C@@H](C)[C@H]2CC[C@H]3C)oc(=O)c1O	2020	New sites	Sesquiterpenoids	Rhodotus	Fungi
C/C=C(/C)C(=O)O[C@H]1CC[C@]2(C)C[C@@H](C(C)=O)C[C@H]2[C@]1(C)O	2020	New sites	Sesquiterpenoids	Syringa	Viridiplantae
C[C@H]1CCCC2=C[C@@H]3OC[C@@](O)(CO)[C@H]3C[C@@]21C	2020	Site combinations	Sesquiterpenoids	Aquilaria	Viridiplantae
CC(=O)OC/C=C(\C)CC1=C(CC(=O)O)[C@]2(C)CCC[C@@](C)(COC(C)=O)[C@H]2CC1	2020	New skeletons	Diterpenoids	Diaporthe	Fungi
CC(=O)O[C@H]1CC2C[C@@]3(C(=O)[C@]24CO4)C1[C@]12CCCC(C)(C)[C@H]1[C@H](O)[C@]3(O)O[C@@H]2O	2020	New sites	Diterpenoids	Isodon	Viridiplantae
CO[C@@H]1C[C@H]2[C@@]3(C)CC[C@H](OC3=O)[C@]2(C)[C@]23CC[C@](C(C)C)(C=C12)OO3	2020	Site combinations	Diterpenoids	Lophanthus	Viridiplantae
CC(=O)O[C@@H]1CC/C(C)=C/C(=O)C/C(C)=C\C[C@]2(C(C)C)CC[C@@]1(C)O2	2020	New modifications	Diterpenoids	Boswellia	Viridiplantae
CC(=O)O[C@H]1C[C@H]2[C@@H]3OC4O[C@@]5(O)[C@@H](O)[C@@H]6C(C)(C)CCC[C@@]6([C@H]4O[C@@H]32)[C@H]15	2020	New skeletons	Diterpenoids	Isodon	Viridiplantae
C[C@@]12[C@H](O)C[C@@H](O[C@@H]3C=C(CO)CC[C@@]31C)[C@@]21CO1	2020	New modifications	Sesquiterpenoids	Trichoderma	Fungi
CCC(C)C(=O)O[C@@H]1[C@@]2(O)[C@@H](OC(C)=O)C(C)(C)[C@H](C(O)C(=O)OC)[C@@]3(C)[C@H]4CC[C@]5(C)C(=CC(=O)O[C@H]5c5ccoc5)[C@]41O[C@]32O	2020	New modifications	Triterpenoids	Xylocarpus	Viridiplantae
CC(=O)O[C@@H](CC1=C(O)C(=O)OC1)[C@]1(C)[C@H]2CCC=C(C)[C@]2(C)[C@@H](O)[C@H](O)[C@]1(C)O	2020	New modifications	Diterpenoids	Scutellaria	Viridiplantae
CC(C)=CCCC1=C[C@]2(OC1=O)c1cc(O)ccc1O[C@H](O)[C@]21C=C2c3cc(O)ccc3O[C@@](C)(CCC=C(C)C)[C@@H]2CC1	2020	New skeletons	others	Ganoderma	Fungi
C[C@@]12CCC[C@@](C)(C(=O)O)[C@H]1CCC1=C[C@@](C)([C@@H](O)CO)CC[C@H]12	2020	New modifications	Diterpenoids	Sigesbeckia	Viridiplantae
C[C@H]1CCC[C@@]2(C)CC[C@@H](O)C[C@]12O	2020	Site combinations	Sesquiterpenoids	Streptomyces	Bacteria
CC(=O)O[C@H]1CC[C@]2(C)c3c(O)c4c(c(O)c3C(=O)CC2C1(C)C)C[C@H](C)O4	2020	New modifications	Diterpenoids	Ajuga	Viridiplantae
CC(=O)OC/C(C)=C/CC[C@]1(C)[C@H]2c3c(O)cc(C)cc3O[C@@]3(C)CC[C@@H]1[C@@H]23	2020	New sites	Meroterpenoids	Rhododendron	Viridiplantae
C=C(C)C1CC[C@]2(C)C[C@H]3O[C@H]4CC5C(C)(C)[C@H](OC(=O)CCCCCCCCCCCCCCCCCCC)CC[C@]5(C)C5CCC(C12)[C@]3(C)[C@@]54C	2020	New modifications	Triterpenoids	Globimetula	Viridiplantae
C=C1CC[C@H]2[C@@](C)(C(=O)O[C@@H]3O[C@H](CO)[C@@H](O)[C@H](O)[C@H]3O)CCC[C@]2(C)[C@H]1CC[C@@]1(O)CCOC1=O	2020	New modifications	Diterpenoids	Pinus	Viridiplantae
CC1(C)[C@H](O)[C@H](O)C[C@]2(C)[C@H]3CC[C@H]4[C@@](C)(CC[C@H]5[C@](C)(O)[C@H](O)CC[C@]45C)CC3=CC(=O)[C@@H]12	2020	New sites	Triterpenoids	Diphasiastrum	Viridiplantae
CCC(C)C(=O)O[C@H]1[C@H]2[C@@H]([C@H](OC(C)=O)[C@@H](C)C(=O)[C@@]34C[C@H](C)[C@H](OC(C)=O)[C@]3(/C=C(\C)[C@H]1OC(C)=O)O4)C2(C)C	2020	New modifications	Diterpenoids	Euphorbia	Viridiplantae
COC(=O)C1=CO[C@@H](O[C@@H]2O[C@H](CO)[C@@H](O)[C@H](O)[C@H]2O)[C@@H]2[C@H](C)O[C@@H](O[C@H]3O[C@H](CO)[C@@H](O)[C@H](O)[C@H]3O)C[C@H]12	2020	New modifications	Monoterpenoids	Cornus	Viridiplantae
CC1=C/C/C=C(\C)CC/C=C(\C)C(=O)C[C@H](C(C)C)\C=C\1	2020	New modifications	Diterpenoids	Sinularia	Metazoa
CC1(C)CCC[C@@]2(C)[C@H]1CC=C1C(=O)O[C@@H](O)[C@@]12O	2020	New modifications	Sesquiterpenoids	Warburgia	Viridiplantae
C/C(=C\C[C@@]1(C)[C@H]2CC[C@@]3(C)C[C@@H]2CC[C@@H]1[C@H]1CC[C@]2(O[C@H]4[C@@H](O)[C@@H](O)[C@H](O[C@@H]5[C@@H](O)[C@H](O)[C@@H](CO)O[C@H]5O)[C@H]4O)[C@@H](O)CC[C@H]2[C@@H]13)CCCC(C)C	2020	New skeletons	Triterpenoids	Panax	Viridiplantae
C=C1C[C@H]2O[C@@H]3[C@H]4[C@@H]2[C@@H](OC(C)=O)[C@@H](C)C[C@@H]4[C@H](C)CO[C@]3(C)[C@@H](OC(C)=O)C[C@H]1O	2020	New modifications	Diterpenoids	Briareum	Metazoa
[CH][C@@]1(C)[C@H](O)[C@@H](C(=O)O)[C@@]2(C)[C@H]1CC[C@]1(C)[C@@H]2CC[C@@H]2[C@H]3[C@@H](C(=C)C)CC[C@]3(C(=O)O)CC[C@]21C	2020	New skeletons	Triterpenoids	Colubrina	Viridiplantae
COC(=O)C(O)[C@H]1[C@]2(C)C[C@]3(O)[C@](O)([C@H]2OC(C)=O)[C@H]2OC4(C)O[C@@]5(C[C@H](O)[C@]6(C)C(=CC(=O)O[C@H]6c6ccoc6)[C@@]25O4)[C@]13C	2020	New modifications	Triterpenoids	Xylocarpus	Viridiplantae
C=C(C)[C@@]1(O)[C@H](OC(=O)/C=C/C=C/CCCCC)[C@@H]2[C@H](O)[C@@](O)(CO)[C@@H](O)[C@]3(O)C(=O)C(C)=C[C@H]3[C@@]2(O)[C@H](C)[C@H]1OC(=O)c1ccccc1	2020	New modifications	Diterpenoids	Daphne	Viridiplantae
C/C1=C\C[C@]2(C)[C@H](O)[C@H](O)[C@@H]([C@H](C)CO)[C@H]2C/C=C(\C)[C@@H](O)CC/C(C)=C/CC1	2020	New modifications	Sesterterpenoids	Aplosporella	Fungi
CC(=O)O[C@H]1C[C@H]2O[C@@]2(C)[C@@H](O)CC/C(C)=C/C[C@]2(C(C)C)CC[C@@]1(C)O2	2020	Site combinations	Diterpenoids	Boswellia	Viridiplantae
C/C=C(/C)C(=O)O[C@H]1CC[C@]2(C)Cc3oc(C(C)(F)c4oc5c(c4C)C[C@H]4[C@](C)(O)[C@@H](OC(=O)/C(C)=C\C)CC[C@]4(C)C5)c(C)c3C[C@H]2[C@]1(C)O	2020	New sites	Others	Dobinea	Viridiplantae
C/C=C(/C)C(=O)O[C@H]1CC[C@]2(C)CC3([C@]45C[C@@]6(C)CC[C@H](OC(=O)/C(C)=C\C)[C@@](C)(OC(C)=O)[C@@H]6CC4=C(C)C(=O)O5)OC(=O)C(C)=C3C[C@H]2[C@]1(C)OC(C)=O	2020	New sites	Others	Dobinea	Viridiplantae
COC(=O)C[C@H](C)[C@H]1OC(=O)c2c(O)c(C)cc(C)c2[C@H]1O	2020	New skeletons	Meroterpenoids	Ganoderma	Fungi
COC(=O)[C@H]1[C@H]2C[C@@H]3c4[nH]c5cc(OC)ccc5c4CCN3C[C@H]2C[C@@H](O)[C@@H]1O	2020	New sites	Meroterpenoids	Rauvolfia	Viridiplantae
C=C[C@@]1(C)CC(=O)[C@@H]2[C@@]3(C)[C@@H](OC(=O)c4ccccc4)[C@@H](OC(C)=O)C(=O)C(C)(C)[C@@H]3C[C@@H](OC(C)=O)[C@@]2(O)C1=O	2020	New modifications	Diterpenoids	Clerodendranthus	Viridiplantae
C[C@H]1C(C=O)=C[C@@H](O)[C@H]2[C@H]1CC[C@@H]1[C@]2(C)CCC[C@@]1(C)CO	2020	Site combinations	Diterpenoids	Erythrophleum	Viridiplantae
C[C@H]1COC2=C1C(=O)C(=O)c1cc3c(cc12)C(C)(C)CCC3=O	2020	New sites	Diterpenoids	Salvia	Viridiplantae
C[C@@]12C[C@H](O)C[C@@](C)(CO)[C@H]1CC[C@]13C[C@H](C(N)=O)[C@H](CC[C@H]12)C3	2020	New sites	Diterpenoids	Zea	Viridiplantae
CC1(C)CC[C@]2(C)CC[C@]3(C)C(=CC[C@@H]4[C@@]5(C)CC[C@H](O)C(C)(C)[C@H]5CC[C@]43C)[C@@H]2C1	2020	New modifications	Triterpenoids	Ziziphus	Viridiplantae
CC(=O)O[C@H]1C/C(C)=C/[C@H](O)/C=C(/CO)[C@H]2CC(C)(C)[C@]12O	2020	New modifications	Sesquiterpenoids	Pestalotiopsis	Fungi
Cc1c2c(cc3c1[C@H](c1ccoc1)OC3=O)C1=C(C[C@@H](O)C2)C(=O)OC1	2020	New sites	Diterpenoids	Salvia	Viridiplantae
COC(=O)C1=CC[C@]2(C)C[C@@H](O)[C@](O)(C(C)C)[C@H]2CC1	2020	New skeletons	Sesquiterpenoids	Trichoderma	Fungi
C=C(C)[C@@]12OC3(/C=C/C=C/CCCCC)O[C@H]1[C@@H]1[C@H]4OC4(CO)[C@H](O)[C@]4(O)C(=O)C(C)=C[C@H]4[C@@]1(O3)[C@@H](C)[C@@H]2OC(=O)c1ccccc1	2020	New modifications	Diterpenoids	Daphne	Viridiplantae
CCCCCC[C@H]1C[C@@H]1CC(=O)OCCC[C@H](C)C(CC/C(C)=C/COc1ccc2ccc(=O)oc2c1)=C(C)C	2020	New skeletons	Sesquiterpenoids	Ferula	Viridiplantae
CCCCCCC(=O)O[C@H]1CC[C@@]2(C)[C@@H](CC[C@]3(C)[C@@H]2C=CC2=C4CC(C)(C)CC[C@]4(C)CC[C@]23C)C1(C)C	2020	Site combinations	Triterpenoids	Micromeria	Viridiplantae
Cc1cc2c(cc(=O)c1O)[C@@]1(CO)CCCC(C)(C)[C@@H]1CC2	2020	New modifications	Diterpenoids	Salvia	Viridiplantae
CC[C@@]12C=CC[N@+]3(CC[C@@]4(C/C=C/c5ccc(O)c(OC)c5)c5cccc(OC)c5N[C@]43CC1)C2	2020	New skeletons	Others	Callichilia	Viridiplantae
COC[C@@]1(O)CC[C@]23O[C@]4(C(C)C)C(=O)[C@H](C=C12)C(C)=C4C[C@H](O)[C@@H]3C	2020	New sites	Diterpenoids	Alternaria	Fungi
CC(=O)O[C@@H](CC1=CC(=O)OC1)[C@]1(C)[C@H]2CCC=C(C)[C@]2(C)[C@H]2O[C@@](O)(C(C)C)C(=O)O[C@@H]2[C@]1(C)O	2020	New modifications	Diterpenoids	Scutellaria	Viridiplantae
CC(=O)O[C@@H]1C[C@H]2C(C)(C)C(=O)C=C[C@]2(C)[C@H]2CC[C@@]3(C)[C@H](c4ccoc4)[C@@H](O)[C@H]4O[C@]43[C@]12C	2020	New modifications	Triterpenoids	Toona	Viridiplantae
CC1=C2CC[C@@]3(C)C/C=C(\C)CC(=O)C[C@@H](C)C[C@@H](OC1=O)[C@@H]23	2020	New modifications	Diterpenoids	Fascaplysinopsis	Metazoa
C[C@@H]1CC[C@@]23COC(=O)C2=CC[C@H](O)[C@@H]3[C@@]1(C)CCc1ccoc1	2020	Site combinations	Diterpenoids	Baccharis	Viridiplantae
CO[C@H]1C[C@@]2(C(C)=O)CCCN3CCc4c(n1c1ccccc41)[C@H]32	2020	New skeletons	Diterpenoids	Kopsia	Viridiplantae
C=C(C(=O)OC)[C@@H]1C[C@H](OC(C)=O)[C@@H]2[C@]3(C1)C(=O)OC[C@]21[C@@H](O)CC[C@@](C)(COC(C)=O)[C@H]1[C@@H]3O	2020	New sites	Diterpenoids	Isodon	Viridiplantae
CC(=O)OCC1(C)O[C@@]12CC(=O)/C(C)=C/CC[C@]1(COC(C)=O)O[C@@H]1C2	2020	New modifications	Sesquiterpenoids	Siparuna	Viridiplantae
CC(=O)OC(C)(C)[C@H]1CCC(C)=C2CC[C@@](C)(O)[C@@H]2C1	2020	New modifications	Sesquiterpenoids	Commiphora	Viridiplantae
CCC(C)C(=O)C1=C(O)C2=C(OC(C)(C)[C@H]3CC[C@](C)(O)C[C@@H]23)C(C)(C)C1=O	2020	New skeletons	Others	Hypericum	Viridiplantae
[C]OC[C@H](CCC=C(C)C)[C@H]1C[C@H](O)[C@@]2(C)C3=CC[C@H]4C(C)(C)C(=O)CC[C@]4(C)C3=CC[C@]12C	2020	New modifications	Triterpenoids	Chisocheton	Viridiplantae
COC(=O)[C@]1(C)[C@H](O)CC[C@]2(C)[C@H]3CC[C@@]4(C)[C@H]5[C@H](C[C@]4(C)C3=CC[C@@H]12)OC(=O)[C@@H]5/C=C\C=C(C)C	2020	New modifications	Triterpenoids	Lantana	Viridiplantae
C=C1CC/C=C(\C)CC[C@@H]2C[C@H](OC(C)=O)[C@@](C)(CC[C@@H]1O)OC2(C)C	2020	New modifications	Diterpenoids	Lobophytum	Metazoa
CC(C)[C@@]12C=C3[C@@](C)(O)CC[C@]3(O)[C@@](C)(CC1)O2	2020	New modifications	Sesquiterpenoids	Curcuma	Viridiplantae
C[C@@]12C(=O)CC3[C@](C)(C1=CC[C@H]2c1ccoc1)[C@H](O)[C@@H]1OC[C@]2(C)[C@H](O)C[C@H](OC(=O)/C=C/c4ccccc4)[C@@]3(C)[C@@H]12	2020	New modifications	Triterpenoids	Melia	Viridiplantae
CC(=O)OC/C(C)=C/CC[C@]1(C)[C@H]2CC[C@@]3(C)Oc4cc(C)cc(O)c4[C@@H]1[C@@H]23	2020	New sites	Meroterpenoids	Rhododendron	Viridiplantae
C=C[C@@](C)(O)CC/C=C(\C)C(=O)O[C@H]1C[C@]2(C(=O)O)CC[C@]3(C)C(=CCC4[C@@]5(C)CC[C@H](OC6O[C@H](CO)[C@@H](O[C@@H]7OC[C@@H](O)[C@H](O)[C@H]7O)[C@H](O)[C@H]6O[C@@H]6OC[C@@H](O[C@@H]7OC[C@@H](O)[C@H](O)[C@H]7O)[C@H](O)[C@H]6O)C(C)(C)C5CC[C@]43C)C2CC1(C)C	2020	Site combinations	Triterpenoids	Erythrophleum	Viridiplantae
Cc1coc2c1C(=O)[C@H]1[C@@](C)(O)CC[C@H](O)[C@@]1(C)C2	2020	New modifications	Sesquiterpenoids	Curcuma	Viridiplantae
CC1(C)CCC=C(C2CCC(C(=O)O)=CC2O)C1	2020	New sites	Sesquiterpenoids	Zea	Viridiplantae
COC(=O)[C@@]1(O)C2=Nc3ccccc3[C@]23CCN2CCC=C([C@@H]1C)[C@@H]23	2020	New skeletons	Meroterpenoids	Bousigonia	Viridiplantae
COC(=O)[C@]1(CO)CCC[C@]2(CO[C@]3(C)N=C[C@]45CCC[C@@]3(C(=O)OC)[C@@H]4CC[C@@H]3[C@@H]5Cc4occc4[C@@H]3C)[C@H]3Cc4occc4[C@H](C)[C@@H]3CC[C@H]21	2020	New modifications	Diterpenoids	Caesalpinia	Viridiplantae
C/C1=C\CC/C(C=O)=C\C=C(\C(C)C)CC/C(C)=C/CC1	2020	New modifications	Diterpenoids	Sarcophyton	Metazoa
C=C1CC[C@@H]2C(C)(C)C(=O)CC[C@@]2(C)[C@@H]1CC/C(C)=C/COC(C)=O	2020	New modifications	Diterpenoids	Euphorbia	Viridiplantae
C=C1C(=O)O[C@@H]2[C@@H]3C(=C(C)C[C@H](OC(=O)C(C)CC)[C@@H]12)C[C@H](O)[C@]3(C)O	2020	New modifications	Sesquiterpenoids	Artemisia	Viridiplantae
C=C(CCC=C(CO)CO)C1CC[C@]2(C)[C@@H]1CC[C@@H]1[C@@]3(C)CCC(=O)C(C)(C)[C@@H]3CC[C@]12C	2020	New modifications	Triterpenoids	Rhus	Viridiplantae
C=C1CC[C@@]2(O)[C@@](C)(C(=O)O)CCC[C@]2(C)[C@]1(O)CC/C(C)=C/CO	2020	Site combinations	Diterpenoids	Talaromyces	Fungi
C=C1C(=O)O[C@H]2/C=C(/CO)[C@@H](OC(C)=O)C[C@@H]3O[C@]3(C)C[C@@H](OC(=O)/C(=C\C)CO)[C@@H]12	2020	New modifications	Sesquiterpenoids	Eupatorium	Viridiplantae
CC(C=O)[C@H]1C(=O)CCC2=CCC[C@H](C)[C@]21C	2020	New modifications	Sesquiterpenoids	Litophyton	Metazoa
C=C(C(=O)O)[C@@H]1CC[C@@]2(C)CCCC(=C)[C@@H]2C1	2020	New modifications	Sesquiterpenoids	Lindera	Viridiplantae
CC(=O)O[C@H]1CC[C@@]2(C)C(C[C@@H]3O[C@]34[C@]23CC[C@]2(C)[C@@H]([C@H](C)CCC=C(C)C)CC[C@@]42C(=O)O3)C1(C)C	2020	New modifications	Triterpenoids	Penares	Metazoa
C/C(=C\CC[C@@](C)(O)[C@@H]1CC[C@](C)(O)[C@H]1C)CO	2020	New modifications	Sesquiterpenoids	Trichoderma	Fungi
CC1=CC[C@H]2C[C@](C)(C(=O)O)CCC[C@]2(C)[C@H]1CCc1ccoc1	2020	New skeletons	Sesquiterpenoids	Microporus	Fungi
COCC1=C2C[C@@]3(C)CC(=O)C(C(C)C)=C3C[C@H](O)[C@H](C)[C@@H]2CC1	2020	Site combinations	Diterpenoids	Alternaria	Fungi
C=C(C)[C@@H]1CC[C@]2(C(=O)O)CC[C@]3(C)C(CCC4[C@@]5(C)CC[C@H](OC(=O)/C=C/c6ccc(O)c(O)c6)C(C)(C)C5CC[C@]43C)C12	2020	New modifications	Triterpenoids	Helicteres	Viridiplantae
CCCCCCC(O)C(=O)O[C@@H]1[C@@H]2[C@H](CC1(C)C)[C@@H](O)[C@H]1C(=O)C(=O)[C@@](CO)(OC)[C@]12C	2020	New modifications	Sesquiterpenoids	Cerrena	Fungi
C=C[C@@]1(C)CC[C@@H]2[C@H](CC[C@@H]3[C@@]2(C)CCC[C@@]3(C)COC(C)=O)[C@@H]1OC(C)=O	2020	New modifications	Diterpenoids	Phalaris	Viridiplantae
CO[C@H]1C=C2C3CC(C)(C)CC[C@]3(C(=O)O[S])CC[C@@]2(C)[C@]2(C)C[C@@H](O)C3[C@](C)(C[C@@H](O)[C@H](O)[C@@]3(C)CO)C12	2020	Site combinations	Triterpenoids	Centella	Viridiplantae
CC(C)=C/C=C\[C@H](C)[C@H]1CC[C@]2(C)C[C@@H]3[C@](C)(O)CC(O)[C@]3(O)/C(C(=O)O)=C\C[C@@H]12	2020	Site combinations	Sesterterpenoids	Aspergillus	Fungi
COc1ccc(CN(C)C(=O)c2ccccc2OC)cc1	2020	New modifications	Others	Zanthoxylum	Viridiplantae
C=C(CC/C=C(\C)CO)[C@H]1CO[C@@H]2O[C@H](CO)[C@@H](O)C(=O)C12O	2020	New modifications	Monoterpenoids	Patrinia	Viridiplantae
CO[C@@]12C[C@H]3[C@H]([C@H](C)C1=C[C@@H](O)O2)[C@H](OC(C)=O)[C@H](OC(=O)c1ccccc1)[C@]1(O)[C@]3(C)CC[C@@H](OC(=O)c2ccccc2)[C@@]1(C)C(=O)O	2020	Site combinations	Diterpenoids	Caesalpinia	Viridiplantae
C/C=C(\C)CC(=O)O[C@@H](C[C@H](O)[C@@](C)(O)CCC=C(C)C)/C(C)=C/CO[C@@H]([C@@H](O)[C@@H](O)CO)[C@H](O)CO	2020	New modifications	Sesquiterpenoids	Fusarium	Fungi
CCC1=C(C=O)[C@H](C(=O)OC)CC[C@@H]1[C@@]1(C)CCCC(C)(C)C1	2020	New modifications	Diterpenoids	Dendrilla	Metazoa
C=C1[C@H]2C[C@H](OC(C)=O)[C@@]3(COC(=O)C(OC(=O)CC(C)C)C(C)C)O[C@@H]1O[C@H](OC)[C@@H]23	2020	New modifications	Monoterpenoids	Valeriana	Viridiplantae
CC(=O)OC[C@]1(C)[C@H]2CC[C@@]34C=C[C@@](C)(CC[C@H]3[C@]23CC[C@@]1(O)OC3)C4	2020	New modifications	Diterpenoids	Euphorbia	Viridiplantae
CC(=O)OC[C@H]1CC[C@H](C)[C@H]2CC(C)(C)CC2=C1CO	2020	New modifications	Sesquiterpenoids	Phellinus	Fungi
C=C(C)[C@]1(O)[C@H](OC(C)=O)[C@@H](C)[C@@]2(O)[C@H]([C@@H]3O[C@@]3(CO)[C@@H](O)[C@@]3(O)C(=O)C(C)=C[C@@H]32)[C@H]1OC(=O)/C=C/C=C/CCCCC	2020	New modifications	Diterpenoids	Daphne	Viridiplantae
COc1cc(C(C)c2c(O)ccc3ccc(=O)oc23)ccc1O	2020	New skeletons	Sesquiterpenoids	Ferula	Viridiplantae
CC1(C)CC[C@]2(C(=O)O)CC[C@]3(C)C(=CCC4[C@@]5(C)C[C@@H](O)[C@H](OC(=O)c6cc(O)c(O)c(O)c6)[C@@](C=O)(CO)C5CC[C@]43C)[C@@H]2[C@@H]1O	2020	New sites	Triterpenoids	Quercus	Viridiplantae
C[C@@H]1C(=O)C2=C(COC2=O)[C@@H]2C[C@@](C)(CO)C[C@H]12	2020	New sites	Others	Conocybe	Fungi
C=C(C)[C@@]1(O)[C@H](OC(=O)/C=C/C=C/C=C/CCC)[C@@H]2[C@@H]3O[C@]3(CO)[C@@H](O)[C@]3(O)C(=O)C(C)=C[C@H]3[C@@]2(O)[C@H](C)[C@H]1OC(C)=O	2020	New modifications	Diterpenoids	Daphne	Viridiplantae
C=C1C(=O)O[C@@H]2/C=C(C)\C=C/C(=O)[C@](C)(O)[C@H](O)[C@@H](OC(=O)/C(=C\C)COC(C)=O)[C@@H]12	2020	New modifications	Sesquiterpenoids	Campuloclinium	Viridiplantae
CC(=O)OC/C(C)=C/CC/C(C)=C/CC[C@@]1(C)C=Cc2c(O)cc(C)cc2O1	2020	New sites	Meroterpenoids	Rhododendron	Viridiplantae
COC(=O)[C@@H]1[C@H]2C[C@@H]3c4[nH]c5ccccc5c4CCN3C[C@@H]2CC[C@H]1O	2020	New modifications	Meroterpenoids	Rauvolfia	Viridiplantae
COC(=O)c1cc(O)c2c(c1)[C@@H](C(C)C)CC[C@H]2CO	2020	Site combinations	Sesquiterpenoids	Trichoderma	Fungi
COC(=O)/C1=C\CC/C(C)=C/C=C(/C(C)C)CC[C@]2(C)O[C@H]2CC1	2020	New modifications	Diterpenoids	Sarcophyton	Metazoa
CC(C)c1cc2c(cc1O)[C@@]13CCCC(C)(C)[C@@H]1C[C@@H]2OC3=O	2020	New modifications	Diterpenoids	Dacrycarpus	Viridiplantae
CC1=C(Cc2c(C)cccc2C)COC1=O	2020	New skeletons	Sesquiterpenoids	Commiphora	Viridiplantae
C[C@]12C[C@H](c3ccoc3)OC(=O)[C@@]1(O)C[C@@H](O)[C@@]13COC(=O)[C@@H]1C=CC=C32	2020	Site combinations	Diterpenoids	Salvia	Viridiplantae
CC(C)(O)CNC(=O)/C=C/c1ccccc1	2020	New modifications	Monoterpenoids	Zanthoxylum	Viridiplantae
C[C@]1(O)[CH]CC[C@]2(C)[C@H]3CC[C@]4(C)CCO[C@H]4C3=C[CH][C@@H]12	2020	New modifications	Diterpenoids	Xylaria	Fungi
COC(=O)[C@@H](C)c1c([C@@]2(C)CCCC(C)(C)C2)ccc2c1C(=O)OC2	2020	New modifications	Diterpenoids	Dendrilla	Metazoa
C=C(C)[C@@]1(O)[C@H](O)[C@@H]2[C@@H]3O[C@]3(CO)[C@@H](O)[C@]3(O)C(=O)C(C)=C[C@H]3[C@@]2(O)[C@H](C)[C@H]1OC(C)=O	2020	New modifications	Diterpenoids	Daphne	Viridiplantae
C[C@H]1[C@@H]2CC(C)(C)CC2=C(CO)[C@H]2CO[C@@]1(O)C2	2020	New modifications	Sesquiterpenoids	Caesalpinia	Viridiplantae
CC(C)C1=C[C@@]2(O)OO[C@H]3CC(=O)[C@H](C)[C@@H]4CCC(=C2[C@@]34C)C1=O	2020	Site combinations	Diterpenoids	Tripterygium	Viridiplantae
CC1(C)CCC[C@@]2(C)[C@H]1CC[C@]1(CBr)[C@@H]2C[C@@H](O)[C@]2(C)C3=C(CC[C@@H]12)C(=O)N(CC(=O)O)C3=O	2020	New sites	Sesterterpenoids	Hyrtios	Metazoa
C[C@@H]1[C@H](O)C(=O)[C@H]2C(C)(C)C(=O)CC[C@]2(C)[C@@]1(O)CCc1ccoc1	2020	New modifications	Diterpenoids	Leonurus	Viridiplantae
C[C@H]1[C@H](C)CC[C@]12CC[C@]1(C)C(=CCC3[C@@]4(C)C[C@@H](O)[C@H](O)[C@@](C)(CO)C4[C@H](O)C[C@]31C)[C@H]2O	2020	New skeletons	Triterpenoids	Syzygium	Viridiplantae
CC(C)c1ccc(O)c(CC[C@H]2[C@]3(C)CCC[C@@]2(C)OC3=O)c1	2020	New modifications	Diterpenoids	Isodon	Viridiplantae
C=C1CC[C@H]2[C@@](C)(CO)[C@@H](O)CC[C@]2(C)[C@H]1CC/C(C)=C/C(=O)O	2020	New modifications	Diterpenoids	Forsythia	Viridiplantae
COC1=CC(=O)C(O)=C(C/C=C(\C)CC[C@@]2(C)CCC=C(C)[C@@H]2C)C1=O	2020	New modifications	Meroterpenoids	Spongia	Metazoa
COC(C)(CC/C=C(\C)CCC=C(C)C)C(O)CC[C@@H]1[C@@]2(C)CC[C@H](O)C(C)(C)C2CC[C@@]1(C)O	2020	Site combinations	Triterpenoids	Pistacia	Viridiplantae
CC(C)[C@]1(O)C(=O)C[C@@]2(C)CC3=C([C@H](C)CC[C@@H]21)[C@H](O)CC3=O	2020	New sites	Diterpenoids	Plagiochila	Viridiplantae
C=C(CC[C@H](C(=O)O)[C@H]1C[C@@H](O)[C@@]2(C)C3=CC[C@H]4C(C)(C)[C@H](O)CC[C@]4(C)C3=CC[C@]12C)C(C)C	2020	New modifications	Triterpenoids	Taiwanofungus	Fungi
C=C1CCC[C@]2(C)CC[C@@H](C(O)(CO)C(=O)OC)C[C@@H]12	2020	Site combinations	Sesquiterpenoids	Aquilaria	Viridiplantae
C[C@@H]1C2C3=CC(=O)C4[C@@]5(C)C[C@@H](O)[C@H](O)[C@@](C)(CO)C5[C@H](O)C[C@@]4(C)[C@]3(C)CC[C@@]2(C(=O)O[S])CC[C@H]1C	2020	New sites	Triterpenoids	Centella	Viridiplantae
C=C(CO)[C@H]1CC[C@]2(C1)C(C)=CC(=O)C[C@H]2C	2020	New modifications	Sesquiterpenoids	Solanum	Viridiplantae
C=C[C@@]1(C)CCC2C(=CCC3C(C)(C)[C@@H](O[C@@H]4O[C@@H](C)[C@H](O)[C@@H](O)[C@H]4O)C[C@H](O)[C@]23C)C1	2020	New modifications	Diterpenoids	Vaccinium	Viridiplantae
CC1(C)CC[C@]2(C(=O)O)CC[C@]3(C)C(=C2C1)C=CC1[C@@]2(C)CC[C@H](O[C@@H]4OC[C@@H](O)[C@H](O)[C@H]4O)C(C)(C)C2CC[C@]13C	2020	New modifications	Triterpenoids	Anemone	Viridiplantae
CCCCO[C@H]1[C@H]2[C@@H]([C@@H](OC(C)=O)[C@@H](C)C(=O)[C@@]34C[C@@H](C)[C@H](OC(C)=O)[C@]3(/C=C(\C)[C@H]1OC(C)=O)O4)C2(C)C	2020	New modifications	Diterpenoids	Euphorbia	Viridiplantae
C[C@@H]1CCC2=C(CC[C@@H](O)C2(C)C)[C@@]12C[C@@H](c1ccoc1)OC2=O	2020	New modifications	Diterpenoids	Croton	Viridiplantae
CO[C@@H]1/C=C(\C)C[C@H](OC(C)=O)[C@]2(O)[C@H](CC2(C)C)[C@@H](CO)C1=O	2020	New modifications	Sesquiterpenoids	Pestalotiopsis	Fungi
C=C(C[C@H](O)C=C(C)C)C(O)CC/C(C)=C/CC/C(C)=C/CO	2020	New modifications	Diterpenoids	Bifurcaria	Others
CCC(=O)OCCC[C@H]1C(=C(C)C)CC[C@H](C)[C@]1(C)COc1ccc2ccc(=O)oc2c1	2020	New modifications	Sesquiterpenoids	Ferula	Viridiplantae
COC[C@@]12CC[C@H](OC)C34C(OC(C=C5C[C@H](OC)C6C[C@@H]3[C@@H]5[C@H]6OC(=O)c3ccccc3)C41)N(CCC(C)=O)C2	2020	New skeletons	Diterpenoids	Aconitum	Viridiplantae
C/C1=C\[C@H](O)[C@H](OC(=O)CO)C(C)(C)C(=O)[C@H](O)C[C@@]23C[C@@H](CC[C@@H]12)[C@](C)(O)C3	2020	New modifications	Diterpenoids	Pieris	Viridiplantae
C[C@H]1C(C)(C2CC[C@@H]3C[C@H]2C[C@]3(O)CO)CCC[C@@]1(C)C(=O)OC1OC(COC2OC(CO)C(O)C(O)C2O)C(O)C(O)C1O	2020	New skeletons	Diterpenoids	Coffea	Viridiplantae
C[C@@H]1C(=O)O[C@@]2(C[C@@H](C)[C@H]3CC[C@@]4(C)C5=C(CC[C@]34CO2)[C@@]2(C)CC[C@@H](OC(=O)CC(=O)O)C(C)(C)[C@@H]2CC5)[C@H]1C	2020	Site combinations	Triterpenoids	Heritiera	Viridiplantae
CC1=C2C(=O)C[C@@]2(C)[C@@H]2[C@@H](O)[C@@H]3C(=O)C[C@@H](C)[C@@]2(CC1)C3(C)C	2020	New sites	Diterpenoids	Trichoderma	Fungi
C[C@H]1[C@@H](O)C[C@@H](C(C)(C)O)[C@]2(CCC(=O)OC2)[C@]12C[C@]1(C)[C@@H](C)[C@H]3C(=O)O[C@@]4(C)O[C@]1(O2)O[C@@]34F	2020	New modifications	Meroterpenoids	Penicillium	Fungi
C[C@@H]1C(=O)O[C@@]2(C[C@@H](C)[C@H]3CC[C@@]4(C)C5=CC[C@H]6C(C)(C)[C@H](OC(=O)CC(=O)O)CC[C@]6(C)C5=C[C@@H](O)[C@]34CO2)[C@H]1C	2020	New modifications	Triterpenoids	Heritiera	Viridiplantae
C[C@]1(CO)CCC[C@](C)(c2ccc(C(=O)O)cc2O)O1	2020	New modifications	Sesquiterpenoids	Aspergillus	Fungi
C=C[C@H]1C[C@@H]2CC[C@H]3C(C)(C)[C@@H](O)CC[C@]3(C)[C@H]2CC1=C	2020	New sites	Diterpenoids	Eragrostis	Viridiplantae
C/C(=C\[C@H]1C[C@@]2(C)OC3=C(C[C@H]2O1)C(=O)CC[C@H]3O)CCC[C@H](C)C(=O)O	2020	Site combinations	Meroterpenoids	Stemphylium	Fungi
CC(=O)OC/C(C)=C\CC/C(C)=C/CC[C@]1(C)C=Cc2c(O)cc(C)cc2O1	2020	New sites	Meroterpenoids	Rhododendron	Viridiplantae
C/C(=C\CC/C(C)=C/CC[C@@]1(C)C=Cc2c(O)cc(C)cc2O1)CO	2020	New sites	Meroterpenoids	Rhododendron	Viridiplantae
C[C@@H]1CC[C@]23[C@@H](C[C@H](C(=O)C[C@H]2C)C3(C)C)[C@]2(C)CC(=O)[C@H]12	2020	New modifications	Diterpenoids	Trichoderma	Fungi
C=C(CC[C@@H](C(=O)O)[C@H]1C(=O)C[C@@]2(C)C3=CC[C@H]4C(C)(C)C(OC(=O)C[C@@](C)(O)CC(=O)OC)CC[C@]4(C)C3=CC[C@]12C)C(C)C	2020	New modifications	Triterpenoids	Chisocheton	Viridiplantae
C[C@H]1CC[C@]2(C(=O)O)CC[C@]3(C)C(=CC[C@@H]4[C@@]5(C)C[C@H](O)[C@@H](O)[C@@](C)(CO)[C@@H]5CC[C@]43C)[C@@H]2[C@@H]1C	2020	New modifications	Triterpenoids	Rhododendron	Viridiplantae
CC1(C)CC[C@]2(C(=O)O)CC[C@]3(C)C(=CC[C@@H]4[C@@]5(C)C[C@H](O)[C@H](O)[C@@](C)(C(=O)O)[C@@H]5CC[C@]43C)[C@@H]2C1	2020	New modifications	Triterpenoids	Medicago	Viridiplantae
CO[C@H]1c2cc(O)c(C(C)C)cc2[C@@]2(C)CCCC(C)(C)[C@@H]2[C@@H]1O	2020	New modifications	Diterpenoids	Dacrycarpus	Viridiplantae
C[C@@H]1C[C@H](O)[C@H](O)C2=CC(=O)[C@@H]3[C@@H](C3(C)C)[C@@]21C	2020	New modifications	Sesquiterpenoids	Neonothopanus	Fungi
CC(=O)O[C@@H](CC1=C(O)C(=O)OC1)[C@]1(C)[C@H]2CCC=C(C)[C@]2(C)[C@@H](OC(=O)c2ccccc2)[C@H](OC(=O)c2cccnc2)[C@]1(C)O	2020	New modifications	Diterpenoids	Scutellaria	Viridiplantae
C=C1CC23CC4C5[C@]67C[C@H](OC(C)=O)C[C@@]5(C)CN4C6[C@]2(O)[C@H](OC(=O)c2ccccc2)C1[C@H](OC(C)=O)C37	2020	New modifications	Diterpenoids	Aconitum	Viridiplantae
CC(C)C1=CC[C@@]2(C)[C@H](O)CCC(=O)[C@@H]2C1	2020	New modifications	Sesquiterpenoids	Conyza	Viridiplantae
C=C1CC[C@H](OC(C)=O)[C@]2(C)[C@@H](OC(C)=O)/C=C\C(COCC)=C/[C@@H]3OC(=O)[C@H](C)[C@@]3(O)[C@@H](OC(C)=O)[C@@H]12	2020	New modifications	Diterpenoids	Ellisella	Metazoa
C[C@@H]1C2=CC(=O)OC2=C[C@H]2C1[C@H](O)[C@H](OC(=O)C=Cc1ccccc1)[C@@]1(O)C(C)(C)CCC[C@]21C	2020	New modifications	Diterpenoids	Caesalpinia	Viridiplantae
CNc1ccccc1C(=O)O[C@H]1C[C@@]2(C)C(C[C@@]1(C)CO)[C@@]1(O)CCC3[C@@]4(C)CC[C@H](O[C@@H]5OC[C@H](O[C@@H]6O[C@H](CO)[C@@H](O)[C@H](O)[C@H]6O)[C@H](O)[C@H]5O[C@@H]5O[C@H](CO)[C@@H](O)[C@H](O)[C@H]5O)[C@@](C)(CO)C4CC[C@@]3(C)[C@]1(C)C[C@@H]2O	2020	New sites	Triterpenoids	Avena	Viridiplantae
C=C1[C@@H](O)C[C@H]2[C@@](C)(CO)CCC[C@]2(C)[C@H]1CC/C(C)=C/C(=O)O	2020	New modifications	Diterpenoids	Forsythia	Viridiplantae
CC1=C2C[C@H]3[C@@H](C[C@H](C)[C@H]2CC1=O)OC(=O)[C@@H]3C	2020	New modifications	Sesquiterpenoids	Geigeria	Viridiplantae
CCO[C@H]1O[C@@H]([C@H](O)C(C)(C)O)C[C@H]1[C@@H]1CC[C@]23C[C@]12CC[C@@H]1[C@@]2(C)CC[C@H](OC(=O)C=C(C)C)C(C)(C)[C@@H]2C[C@H](O)[C@]13C	2020	New modifications	Triterpenoids	Toona	Viridiplantae
C=C1CC[C@]2(C(C)C)CC[C@@](C)(O2)[C@H](OC(C)=O)C/C=C(/C)C[C@@H]2O[C@H]12	2020	New modifications	Diterpenoids	Boswellia	Viridiplantae
C=C(C)[C@@H]1CC[C@@]2(C)[C@H](O[C@@H]3O[C@H](CO)[C@@H](O)[C@H](O)[C@H]3O)CC[C@H](C)[C@]2(O)C1	2020	New modifications	Sesquiterpenoids	Datura	Viridiplantae
COc1cc2c(cc1O)C=C[C@](C)(CC/C=C(\C)CCC=C(C)C)O2	2020	New modifications	Meroterpenoids	Trichothecium	Fungi
C[C@@H]1C(=O)CC[C@H]2[C@@]1(C)CC[C@@H](C)[C@]21C[C@@H](c2ccoc2)OC1=O	2020	New modifications	Diterpenoids	Croton	Viridiplantae
CC1=CC(=O)C(=C(C)C)C[C@@]23O[C@]2(C)CC[C@]13O	2020	Site combinations	Sesquiterpenoids	Curcuma	Viridiplantae
CC(=O)O[C@@H]1CO[C@@H](O[C@@H]2CC(C)(C)C[C@H]3C4=CC[C@@H]5[C@@]6(C)CC[C@H](O[C@@H]7O[C@H](C(=O)O)[C@@H](O)[C@H](O)[C@H]7Oc7c(C)cccc7C)C(C)(C)[C@@H]6CC[C@@]5(C)[C@]4(C)C[C@@H](O)[C@]32CO)[C@H](O)[C@H]1OC(C)=O	2020	New modifications	Triterpenoids	Impatiens	Viridiplantae
CC1(C)C(=O)CC[C@@]2(C)C1C[C@H]1O[C@]13C(=O)OC[C@H]23	2020	Site combinations	Sesquiterpenoids	Inonotus	Fungi
COC(=O)[C@@H]1O[C@@H](O)C(=O)[C@]2([C@H](O)/C=C(C)/C=C/C=O)O[C@H]12	2020	New skeletons	Meroterpenoids	Trichothecium	Fungi
CCO/N=C/C1[C@@H]2Cc3c([nH]c4ccccc34)[C@@H]3C[C@H]1[C@@H](CO)[C@H](C)N32	2020	New sites	Others	Rauvolfia	Viridiplantae
CC[C@H](C)CCCCCCCCCCC(=O)OC[C@H]1O[C@@H](OC(=O)/C(C)=C/C=C/C(C)=C/C=C/C(C)=C/C=C/C=C(C)/C=C/C=C(\C)CCC=C(C)C)[C@H](O)[C@@H](O)[C@@H]1O	2020	New modifications	Triterpenoids	Staphylococcus	Bacteria
Cn1cccc1	2020	New skeletons	Others	Adenocalymma	Viridiplantae
C/C=C1/[C@H](O[C@@H]2O[C@H](CO)[C@@H](O)[C@H](O)[C@H]2O)OC=C(C(=O)O)[C@H]1CC(=O)OCCc1ccc(OC)cc1	2020	New modifications	Monoterpenoids	Fraxinus	Viridiplantae
CC1(C)CCC[C@@]2(C)[C@H]1CC[C@@]13C[C@@H](CC[C@@H]12)[C@](C)(O)C3	2020	New modifications	Diterpenoids	Vachellia	Viridiplantae
C[C@@H]1C2=C3CC[C@@H]4[C@]5(C)[C@@H](CC[C@@]4(C)[C@]3(C)CC[C@@]2(C(=O)O)CC[C@]1(C)O)C(C)(C)[C@H](O)[C@H](O)[C@@H]5O	2020	New sites	Triterpenoids	Rosa	Viridiplantae
CC(C)CC(=O)O[C@@H]1OC=C(CO[C@H]2C[C@@H](O)[C@H](O)[C@@H](CO[C@@H]3O[C@H](CO)[C@@H](O)[C@H](O)[C@H]3O)O2)C2C[C@H](O)[C@H](CO)C21	2020	New modifications	Monoterpenoids	Sambucus	Viridiplantae
COC(=O)[C@@H]1[C@H]2C[C@@H]3c4[nH]c5ccccc5c4CCN3C[C@H]2C[C@@H](O)[C@H]1O	2020	New modifications	Meroterpenoids	Rauvolfia	Viridiplantae
C=C[C@H]1C[C@@H]2CC[C@H]3C(C)(C)C(=O)CC[C@]3(C)[C@H]2CC1=C	2020	New sites	Diterpenoids	Eragrostis	Viridiplantae
C=C[C@]1(C)CC[C@@]2(O)[C@](O)(CC[C@@]3(O)[C@@](C)(C(=O)O)CCC[C@]23C)C1	2020	Site combinations	Diterpenoids	Talaromyces	Fungi
C=C(CO)[C@@H]1CC[C@@]2(C)[C@H](O)C[C@H](O)C(=C)[C@@H]2C1	2020	New modifications	Sesquiterpenoids	Datura	Viridiplantae
C=C1[C@H](OC(=O)c2ccccc2)[C@@H](OC(=O)/C=C/c2cccc3c2OCO3)C(=O)C(C)(C)[C@@H]2O[C@H]2[C@H](C)C(=O)[C@]2(OC(C)=O)[C@@H]([C@H]1OC(=O)c1ccccc1)[C@@H](OC(C)=O)[C@](C)(O)[C@@H]2O	2020	New modifications	Diterpenoids	Euphorbia	Viridiplantae
C[C@@H]1C[CH][C@@H](O)C2=CC(=O)[C@@H]3[C@@H](C3(C)C)[C@@]21C	2020	New modifications	Sesquiterpenoids	Neonothopanus	Fungi
C=C1CCC(C(C)(C)O)=C[C@@H]2[C@@H]1CC[C@]2(C)O	2020	New modifications	Sesquiterpenoids	Curcuma	Viridiplantae
C=C[C@@]1(C)C=C2C=C[C@H]3[C@](C)(CO)CCC[C@]3(C)[C@H]2CC1	2020	New modifications	Diterpenoids	Callicarpa	Viridiplantae
C=C(C)[C@]1(OC(=O)c2ccccc2)[C@@H](OC(C)=O)[C@@H](C)[C@@]2(O)[C@@H]([C@H](OC(C)=O)[C@@]3(C)O[C@]4([C@@H](OC(=O)c5ccccc5)[C@@H](C)C[C@H]42)[C@@H]3O)[C@H]1OC(C)=O	2020	New sites	Diterpenoids	Wikstroemia	Viridiplantae
C=C(CC[C@H](C(=O)O)[C@H]1C[CH][C@@]2(C)C3=C(CC[C@]12C)[C@@]1(C)CC[C@@H](O)C(C)(C)[C@@H]1CC3)C(C)C	2020	New modifications	Triterpenoids	Taiwanofungus	Fungi
C=C1C(=O)O[C@@H]2[C@H]3C(C)=CCC3=C(CO)C[C@@H](OC(=O)/C(=C/CO)CO)[C@@H]12	2020	New modifications	Sesquiterpenoids	Eupatorium	Viridiplantae
C=C([C@@H]1CC=C(C)C(=O)O1)[C@@H]1CC[C@]2(C)[C@@H]1CC[C@@H]1[C@@]34CO[C@](O)([C@@H](O)C3)C(C)(C)[C@@H]4CC[C@]12C	2020	Site combinations	Triterpenoids	Rhus	Viridiplantae
C[C@@]12CCO[C@H]1C1=C[CH][C@H]3[C@H](O)[CH]CC[C@]3(C)[C@H]1CC2	2020	New skeletons	Diterpenoids	Xylaria	Fungi
C=C(C)[C@@]12OC3(c4ccccc4)O[C@H]1[C@@H]1[C@H]4OC4(CO)[C@H](O)[C@]4(O)C(=O)C(C)=C[C@H]4[C@@]1(O3)[C@@H](C)[C@@H]2OC(=O)c1ccccc1	2020	New modifications	Diterpenoids	Daphne	Viridiplantae
CC1=C2C[C@@]3(C)CC(=O)[C@](O)(C(C)C)[C@@H]3CC[C@H](C)[C@@]2(O)CC1=O	2020	Site combinations	Diterpenoids	Plagiochila	Viridiplantae
C[C@H]1O[C@H](OC(=O)[C@]23CC[C@](C)(C=O)C[C@H]2C2=CC[C@@H]4[C@@]5(C)CCC(=O)C(C)(C)[C@@H]5CC[C@@]4(C)[C@]2(C)CC3)[C@@H](O)[C@@H](O)[C@@H]1O	2020	New sites	Triterpenoids	Leucas	Viridiplantae
C[C@@H]1CC[C@]2(C(=O)O)CC[C@]3(C)C(=CCC4[C@]5(C)C(CC[C@]43C)[C@](C)(CO)[C@@H](O)[C@H](O)[C@H]5O)C2[C@]1(C)O	2020	New sites	Triterpenoids	Francoeuria	Viridiplantae
C=C([C@@H]1CC=C(C)C(=O)O1)[C@@H]1CC[C@]2(C)[C@@H]1CC[C@@H]1[C@]34CC[C@@](O)(OC3)C(C)(C)[C@@H]4C[C@H](O)[C@]12C	2020	Site combinations	Triterpenoids	Rhus	Viridiplantae
CC(O)[C@H](C)[C@@H]1CC2(C=C3C(O)CC4C5(C)CCC(O[C@@H]6OC[C@H](O)[C@H](O)[C@H]6O[C@@H]6O[C@H](CO)[C@@H](O)[C@H](O)[C@H]6O)C(C)(C)C5CCC4(C)C3(C)CC2)C(=O)O1	2020	New modifications	Triterpenoids	Ilex	Viridiplantae
CC(=O)[C@@H]1[C@@H](O)C[C@@H]2[C@](C)(C(=O)C[C@H]3[C@@]2(C)CC[C@H]2C(C)(C)CCC[C@@]23CO)[C@H]1C=O	2020	New modifications	Sesterterpenoids	Lendenfeldia	Metazoa
CC(C)[C@@H]1CC[C@@H](CO)[C@H]2[C@@H](O)CC(C(=O)O)=C[C@H]12	2020	New modifications	Sesquiterpenoids	Undefined	Others
C[C@@H]1CCC(C)(C)[C@@H]2CC[C@](O)(CO)[C@H](CO)[C@@]21C	2020	New skeletons	Sesquiterpenoids	Streblus	Viridiplantae
CC(C)C[C@H]1c2c(O)c(C=O)c(O)c(C=O)c2O[C@]2(C)C(=O)C=C(C(C)C)C[C@H]12	2020	New sites	Others	Eucalyptus	Viridiplantae
C[C@@H]1CC[C@]2(C)[C@H](CC[C@@H](O)[C@]2(C)O)[C@@]12C[C@@H](c1ccoc1)OC2=O	2020	New modifications	Diterpenoids	Croton	Viridiplantae
C=C1C=CC(=O)OC(C)(C)[C@@H]1CC(=O)O	2020	New sites	others	Tetradium	Viridiplantae
CC(=O)OC[C@]1(C)C2CC[C@@]3(C)CC4=CC(=O)C5C(C)(C)[C@@H](O)CC[C@]5(C)C4CCC3[C@@]2(C)CC[C@H]1O	2020	New modifications	Triterpenoids	Lycopodium	Viridiplantae
CC(=O)O[C@H]1C[C@@]2(O)[C@@H](OC(C)=O)[C@H]3[C@@](C)([C@@H](O)C[C@H](O)[C@]34CO4)[C@@H](OC(C)=O)[C@H](OC(C)=O)C(=C1C)C2(C)C	2020	New modifications	Diterpenoids	Taxus	Viridiplantae
COc1cccc2c1cc([N+](=O)O)c1c(C(=O)O)cc3c(c12)OCO3	2020	New sites	Sesquiterpenoids	Aristolochia	Viridiplantae
CCCC(=O)C1=C(O)C2=C(OC(C)(C)[C@@H]3CCC(C)=C[C@H]23)[C@@](C)(CC=C(C)C)C1=O	2020	New skeletons	Meroterpenoids	Hypericum	Viridiplantae
CC(=O)O[C@H]1C2=C[C@@]3(C)O[C@@]4(O[C@]3(O)C[C@H]3[C@@H](C[C@H]4C)C3(C)C)[C@H]2C[C@H]1C	2020	Site combinations	Diterpenoids	Jatropha	Viridiplantae
C=C(C)[C@]1(O)C[C@@H](C)[C@]2(O)[C@@H]3C[C@H](C)[C@H](O)[C@]34O[C@H]([C@H]2[C@H]1O)[C@@](O)(CO)[C@H]4OC(=O)c1ccccc1	2020	New sites	Diterpenoids	Daphne	Viridiplantae
O=C(O)[C@@H]1CCCN1	2020	Site combinations	Others	Adenocalymma	Viridiplantae
C/C=C(/C)C(=O)O[C@H]1CC[C@]2(C)Cc3occ(C)c3C[C@H]2[C@]1(C)O	2020	New modifications	Sesquiterpenoids	Syringa	Viridiplantae
COC(C)(C)C[C@@H]1Oc2c(O)c(C(C)C)cc3ccc(C)c(c23)[C@@H]1O	2020	New modifications	Diterpenoids	Salvia	Viridiplantae
C[C@H]1CCC2=C(C(=O)NCCOC2=O)[C@@H]2CC(C)(C)C[C@H]12	2020	New modifications	Sesquiterpenoids	Phellinus	Fungi
C[C@@]12CCO[C@H]1C1=C[CH][C@H]3[C@@](O)(CO)[CH]CC[C@]3(C)[C@H]1CC2	2020	Site combinations	Diterpenoids	Xylaria	Fungi
C[C@H]1[C@@H]2[C@H](O)C[C@]34C=C[C@](C)(CC[C@@H]3[C@@]23CC[C@@]1(O)OC3)C4	2020	New modifications	Diterpenoids	Excoecaria	Viridiplantae
CC1=CC[C@H]([C@H](C)[C@H]2C[C@H]3O[C@@]34[C@@H]3CC[C@H]5C(C)(C)O[C@@H]6CC(=O)O[C@]56C[C@@]3(O)CC[C@]24C)OC1=O	2020	Site combinations	Triterpenoids	Kadsura	Viridiplantae
CC(=O)OC1CC(O)C23COC(O)C1(C)C2CC1OC24C(O)CC(c5ccoc5)C2(C)C(OC(C)=O)C(=O)C3C14C	2020	New modifications	Triterpenoids	Melia	Viridiplantae
C=C(C)[C@@]12OC3(c4ccccc4)O[C@H]1[C@@H]1[C@H]4OC4(CO)[C@H](O)[C@]4(O)C(=O)C(C)=C[C@H]4[C@@]1(O3)[C@@H](C)[C@@H]2OC(C)=O	2020	New modifications	Diterpenoids	Daphne	Viridiplantae
CO[C@@H]1[C@@H](OC)[C@H](OC)[C@@H](OC)[C@H](C/C(C)=C/CO)[C@H]1OC(C)=O	2020	New sites	Meroterpenoids	Garcinia	Viridiplantae
C=C1CC[C@@H]2[C@H](CC2(C)C)[C@@](O)(CO)CC[C@@H]1O	2020	New modifications	Sesquiterpenoids	Evolvulus	Viridiplantae
CC(C)[C@@H]1CCC(C(=O)O)=C2CCC(C(=O)O)=C[C@@H]21	2020	New modifications	Sesquiterpenoids	Undefined	Others
CC(C)=CC[C@]12CC(=O)C1=C(O)C(C)(C)[C@@H](O)C2(C)C	2020	New skeletons	Sesquiterpenoids	Streblus	Viridiplantae
C=C[C@@]1(C)CC[C@@H]2[C@H](CC[C@@H]3[C@@]2(C)[C@H](OC(C)=O)CC[C@@]3(C)COC(C)=O)C1	2020	New modifications	Diterpenoids	Phalaris	Viridiplantae
C=C(C1CC=C(C)C(=O)O1)C1CC[C@]2(C)[C@@H]1CC[C@@H]1[C@@]3(C)CCC(=O)C(C)(C)[C@@H]3CC[C@]12C	2020	New modifications	Triterpenoids	Rhus	Viridiplantae
C[C@H]1CC[C@]2(C(=O)O)CC[C@]3(C)C(=C2[C@@H]1C)C=C[C@@H]1[C@@]2(C)CCC(=O)C(C)(C)[C@@H]2CC[C@]13C	2020	New modifications	Triterpenoids	Rhododendron	Viridiplantae
C=Cc1c(C)c(O)cc2c1CC[C@@H]1C(C)(C)[C@@H]3C[C@@H](O)[C@]21O3	2020	New sites	Diterpenoids	Aspidopterys	Viridiplantae
C=C(C)[C@H]1[C@H](OC(C)=O)C[C@H](C)[C@@]12CC=C(C)[C@@H](OC(=O)CCCCCCC/C=C\C/C=C\CCCCC)C2	2020	New modifications	Sesquiterpenoids	Penicillium	Fungi
CC(=O)OC1C2C3C(C4C(O)CCCC42C)C3C1(C)C(=O)O	2020	New skeletons	Sesquiterpenoids	Botrytis	Fungi
C[C@@H]1C2=CC(=O)O[C@]2(O)C[C@H]2[C@H]1[C@H](O)[C@H](OC(=O)C=Cc1ccccc1)[C@@]1(O)C(C)(C)[CH]CC[C@]21C	2020	New modifications	Diterpenoids	Caesalpinia	Viridiplantae
C[C@@H](CO[C@@H]1O[C@H](CO)[C@@H](O)[C@H](O)[C@H]1O)[C@@H]1CC[C@](C)(O)[C@H]2CCC(CO)=C[C@H]21	2020	New sites	Sesquiterpenoids	Balanophora	Viridiplantae
CCCCCCCCCCCCCCCC(=O)O[C@@]12C[C@@H](C)[C@@]3(O)[C@@H](C(=O)C(CO)=C[C@]4(O)C(=O)C(C)=C[C@@H]34)[C@@H]1C2(C)C	2020	New modifications	Diterpenoids	Reutealis	Viridiplantae
CC(C)=CC(=O)C/C(C)=C/CC[C@@](C)(O)CCC/C(C)=C/CO	2020	New modifications	Diterpenoids	Bifurcaria	Others
COc1cc2c(cc1O)-c1cc(C)ccc1C(C)(CCC=C(C)C)O2	2020	New skeletons	Meroterpenoids	Trichothecium	Fungi
CC[C@H](C)[C@H]1OC(=O)c2c(O)c(C)cc(C)c2[C@H]1O	2020	New skeletons	Meroterpenoids	Ganoderma	Fungi
CO[C@@H]1O[C@@H](C)[C@@H]2[C@@H](O)C[C@@H]3[C@](C)(C(=O)C[C@@H]4[C@@]5(C)CCCC(C)(C)[C@@H]5CC[C@@]34C)[C@H]21	2020	New modifications	Sesterterpenoids	Lendenfeldia	Metazoa
CC(=O)O[C@@H]1/C=C(\CO)C(=O)/C=C/C(C)(C)C/C=C(\C)C1	2020	New modifications	Sesquiterpenoids	Leptogorgia	Metazoa
C[C@]12[C@@H]3[C@H](c4ccoc4)OC(=O)[C@@]31[C@@H](O)C[C@@]13COC(=O)C1=CCC[C@@H]32	2020	New modifications	Diterpenoids	Salvia	Viridiplantae
C=C1[C@@H](OC(C)=O)[C@H]2[C@@]3(C)C(=C(O)C(=O)[C@]2(C)[C@]2(C(=O)OC)C(=O)[C@@H](C)OC(=O)[C@]12C)C(C)(C)C(=O)C[C@H]3O	2020	New sites	Meroterpenoids	Aspergillus	Fungi
C=C1CC[C@@]2(O)C(C)(C)C(=O)CC[C@]2(C)[C@H]1CC/C(C)=C/C(=O)O	2020	Site combinations	Diterpenoids	Caryopteris	Viridiplantae
CC1=C2CC[C@@](C)(O)[C@@H]3CC[C@@](C)(O)[C@H](CC/C(C)=C/[C@@H]2OC1=O)O3	2020	New modifications	Diterpenoids	Sarcophyton	Metazoa
CC(C)(O)[C@@H](O)CC[C@@](C)(O)[C@H]1[C@@H](O)C[C@@]2(C)[C@@H]3C[C@H](O[C@@H]4O[C@H](CO)[C@@H](O)[C@H](O)[C@H]4O)[C@H]4C(C)(C)[C@@H](O[C@@H]5OC[C@@H](O)[C@H](O)[C@H]5O)CC[C@@]45C[C@@]35CC[C@]12C	2020	New modifications	Triterpenoids	Astragalus	Viridiplantae
CC(C)[C@@H]1CC[C@]2(C)C(=O)CCC(CO)=C[C@@H]12	2020	New modifications	Sesquiterpenoids	Fissistigma	Viridiplantae
CC(=O)CC[C@@H](C(C)C)[C@H]1[C@@H]2CC[C@](O)(CO)[C@@H]21	2020	New sites	Sesquiterpenoids	Echinacea	Viridiplantae
CC(C)[C@]1(O)CC[C@]2(C)C[C@@H]3O[C@]3(C)C[C@@H](OC(=O)c3ccc(O)cc3)[C@H]21	2020	New modifications	Sesquiterpenoids	Ferula	Viridiplantae
C[C@@H]1c2ccoc2C[C@H]2[C@H]1[C@H](OC(=O)c1ccccc1)[C@H](OC(=O)c1ccccc1)[C@@]1(O)[C@](C)(C(=O)O)[CH]CC[C@]21C	2020	New modifications	Diterpenoids	Caesalpinia	Viridiplantae
CC1(C)C(O[C@@H]2O[C@H](C(=O)O)C(O)[C@H](O[C@@H]3O[C@H](CO)[C@@H](O)[C@H](O)[C@H]3O)[C@H]2O[C@@H]2O[C@H](CO)[C@@H](O)[C@H](O)[C@H]2O[C@@H]2O[C@H](CO)[C@@H](O)[C@H](O)[C@H]2O)CC[C@@]2(C)[C@H]1CC[C@]1(C)[C@@H]2CC=C2[C@@H]3C[C@@](C)(C(=O)O)CC[C@]3(C)C(=O)C[C@]21C	2020	New modifications	Triterpenoids	Toxicopueraria	Viridiplantae
C=C(/C=C/c1ccc(O)c(OC)c1)OC[C@@]12CC[C@@]3(CC(=O)OC)CC[C@@H](C(=C)C)[C@@H]3[C@H]1CC[C@@H]1[C@@]3(C)CC[C@H](OC(C)=O)C(C)(C)[C@@H]3CC[C@]12C	2020	New sites	Triterpenoids	Peganum	Viridiplantae
Cc1ccc(C(C)C)cc1C(CC(C)C)c1c(O)c(C=O)c(O)c(C=O)c1O	2020	New sites	Others	Eucalyptus	Viridiplantae
C=C1C2=C(C(C)C)[C@@H](OC)[C@@H]1/C=C1\[C@@H](CC[C@]1(O)COC)[C@@H](C)[C@@H](O)C2	2020	New modifications	Diterpenoids	Alternaria	Fungi
CC(=O)C1C(O)CC2(C)C3CC=C4C(CCC(O)C4(C)C)C3(C)C(=O)CC12C	2020	New modifications	Triterpenoids	Ibervillea	Viridiplantae
COC(=O)c1cncc([C@H](O)CN2CCc3c([nH]c4ccccc34)C2=O)c1	2020	New sites	Diterpenoids	Neolamarckia	Viridiplantae
CCN1C[C@]2(COC)CC[C@H](OC)C34C1OC(C32)[C@@H]1O[C@@]12C[C@H](OC)C1C[C@@H]4[C@@H]2[C@H]1OC(=O)c1ccc(OC)cc1	2020	New skeletons	Diterpenoids	Aconitum	Viridiplantae
C/C=C1/C=C([C@H](O)[C@@H](C)O)C(=O)O1	2020	New skeletons	Others	Penicillium	Fungi
C=C[C@@]1(C)C=C2[C@@H](OC)C[C@H]3[C@@](C)(CC[C@@H](O)[C@]3(C)CO)[C@@H]2CC1	2020	New modifications	Diterpenoids	Euphorbia	Viridiplantae
C=C1C(=O)O[C@H]2/C=C(/CO)[C@@H](OC(C)=O)C[C@@H]3O[C@]3(C)C[C@@H](OC(=O)/C(C)=C/CO)[C@@H]12	2020	New modifications	Sesquiterpenoids	Eupatorium	Viridiplantae
C=C[C@@]1(C)C=C2CC[C@@H]3C(=C)[C@H](O)CC[C@@]3(C)[C@@H]2C[C@@H]1O	2020	Site combinations	Diterpenoids	Euphorbia	Viridiplantae
C=C[C@]1(C)CC[C@H]2C(=CC[C@H]3[C@@](C)(COCO)CCC[C@]23C)[C@@H]1OC	2020	New modifications	Diterpenoids	Callicarpa	Viridiplantae
CC1=C(C=O)[C@@H]2[C@H](COC(=O)CO)[C@@]1(C)CC[C@@H]2C(C)C	2020	New modifications	Sesquiterpenoids	Bipolaris	Fungi
C=C(OC1C(=O)O[C@@H]2C[C@H]3C(C)=CC(=O)[C@@H](O)[C@]3(C)[C@@H]3[C@@]24CO[C@@]3(O)C(O)C(=C)[C@H]14)C(O)CC	2020	New modifications	Triterpenoids	Ailanthus	Viridiplantae
C[C@@H]1C=C[C@@]2(O)[C@](C)(C[C@H](O)C[C@]2(C)C(=O)O)O1	2020	New modifications	Others	Arachis	Viridiplantae
CC1(O)CC[C@H]2[C@@](C)(C(=O)O[C@@H]3O[C@H](CO)[C@@H](O)[C@H](O)[C@H]3O)CCC[C@]2(C)[C@H]1CCC1=CCOC1=O	2020	New modifications	Diterpenoids	Pinus	Viridiplantae
C[C@@H]1c2ccoc2C[C@H]2[C@H]1[C@H](O)[C@H](OC(=O)c1ccccc1)[C@@]1(O)C(C)(C)[CH]CC[C@]21C	2020	New modifications	Diterpenoids	Caesalpinia	Viridiplantae
C=C[C@]1(C)C=C2C(=O)[C@@]3(O)OC[C@@]4(CCCC(C)(C)[C@]34O)[C@@]2(O)[C@@H](O)C1	2020	New modifications	Diterpenoids	Penicillium	Fungi
CC(=O)O[C@H]1CC[C@@H]2[C@@](C)(COc3ccc4ccc(=O)oc4c3)[C@@H](C)CC[C@@]2(C)[C@@H]1C	2020	New modifications	Meroterpenoids	Ferula	Viridiplantae
C[C@@]1(O)CCC[C@]2(C)[C@H]3CC[C@@]4(C)[C@@H](OC[C@@H]4O)C3=CC[C@@H]12	2020	Site combinations	Diterpenoids	Xylaria	Fungi
CC1(C)CCC[C@]2(C)C3=C(CC[C@@]12C)C(=O)N(CC(=O)O)[C@@H]3O	2020	New skeletons	Sesquiterpenoids	Undefined	Others
CC(C)=CCC/C(C)=C/C[C@@H]1CC/C(C)=C/[C@@H]2[C@H](CC[C@]1(C)O)C2(C)C	2020	New skeletons	Sesquiterpenoids	Dictyostelium	Others
CC1(C)CC2[C@@](C(=O)O)(CC[C@@]3(C)[C@]4(C)CCC5[C@](C)(C(=O)O)[C@@H](O)[C@@H](O)C[C@]5(C)C4CC[C@@]23O)[C@@H](O)C1	2020	Site combinations	Triterpenoids	Curcuma	Viridiplantae
C/C(O)=C/C[C@@]1(C)[C@H]2CC[C@@]3(C)C[C@@H]2CC[C@@H]1[C@H]1CC[C@]2(O[C@H]4[C@@H](O)[C@@H](O)[C@H](O[C@H]5[C@@H](O)[C@@H](O)[C@H](O)[C@@H](O)[C@@H]5O)[C@H]4O)[C@@H](O)CC[C@H]2[C@@H]13	2020	New skeletons	Triterpenoids	Panax	Viridiplantae
COc1cc(C(=O)OC[C@H]2O[C@@H](O[C@H]3C[C@]4(C)CO[C@](C)(C3)[C@]4(O)/C=C/C(C)=C\C(=O)O)[C@H](O)[C@@H](O)[C@@H]2O)cc(OC)c1O	2020	New modifications	Sesquiterpenoids	Zanthoxylum	Viridiplantae
CCCCC/C=C\C/C=C\CCCCCCCC(=O)O/C(=C\Cc1c(OC)cc(COC(=O)CCCCCCCCCCCCCCCCC)c(C=O)c1O)CC(C)C=C(C)C	2020	New modifications	Sesquiterpenoids	Hericium	Fungi
CC1=CC[C@H]2[C@@](C)(CC[C@]2(O)C(C)C)CC1=O	2020	New skeletons	Sesquiterpenoids	Conyza	Viridiplantae
C=CC1C(C(C)O[C@@H]2O[C@H](CO)[C@@H](O)[C@H](O)[C@H]2O)[C@@]2(CO[C@@H]3C[C@H]4[C@H](O)[C@@H]5O[C@]5(CO)[C@H]4[C@H](O[C@@H]4O[C@H](COC(=O)/C=C/c5ccccc5)[C@@H](O)C4(O)O)O3)O[C@H]2[C@H]1OC(=O)c1ccc(O)c(OC)c1	2020	New skeletons	Monoterpenoids	Picrorhiza	Viridiplantae
C[C@H]1C(C(=O)O)=C[C@@H](O)[C@H]2[C@H]1CC[C@@H]1[C@]2(C)CCC[C@@]1(C)C(=O)O	2020	Site combinations	Diterpenoids	Erythrophleum	Viridiplantae
C=C1CC[C@H]2C(C)(C)CCC[C@]2(C)[C@H]1CCOC(=O)CCOC=O	2020	New modifications	Diterpenoids	Globba	Viridiplantae
C=C(CC/C=C(/C)C(=O)O)C1CC=C(C)CC1	2020	New modifications	Sesquiterpenoids	Zea	Viridiplantae
C[C@H]1CC[C@H](C(C)(C)O)CC2=C1C(=O)C[C@H]2C	2020	New modifications	Sesquiterpenoids	Litsea	Viridiplantae
Cc1ccc2c(c1)[C@H](C)C[C@H](O)[C@@H]1C(=O)OC[C@@H]21	2020	Site combinations	Sesquiterpenoids	Irpex	Fungi
CC(C)C(=O)CC[C@@H](C)[C@H]1CC[C@H]2[C@@H]3[C@@H](O)CC4=CC(=O)CC[C@]4(C)[C@H]3CC[C@@]21C	2020	New modifications	Steroids	Sargassum	Others
CC1=C(C)[C@@H]2CC[C@@]3(C)[C@@H]4COC(=O)C4=CC[C@@H]3[C@@]2(C)CC1	2020	New skeletons	Diterpenoids	Acanthodendrilla	Metazoa
CC1(C)C2CC[C@]3(C)C(C[C@@H](O)C4[C@@H]([C@]5(C)CCC(=O)O5)CC(=O)[C@]43C)[C@@]23CC[C@@]1(O)OC3	2020	New sites	Triterpenoids	Cleome	Viridiplantae
C=C(C)C(=O)O[C@H]1C/C(C=O)=C\CC/C(CO)=C/[C@@H]2OC(=O)C(=C)[C@H]21	2020	New modifications	Sesquiterpenoids	Sigesbeckia	Viridiplantae
C=C[C@@]1(C)CCC2C(C1)[C@@H](OC(C)=O)CC1[C@@]2(C)CC[C@H](OC(C)=O)[C@@]1(C)CO	2020	New modifications	Diterpenoids	Phalaris	Viridiplantae
C[C@@]12CC[C@@]3(C(=O)O)CC[C@@](C)(C(=O)O)[C@@H](O)[C@H]3C1=CCC1[C@@]3(C)C[C@@H](O)[C@H](O)[C@@](C)(CO)C3CC[C@]12C	2020	New sites	Triterpenoids	Ilex	Viridiplantae
CC/C1=C2\C(=O)C=C(C)[C@H]2C[C@@]2(C)CC[C@@]3(O[C@@H](C=C(C)C)C[C@@H]3C)[C@@H]2CC1=O	2020	New skeletons	Others	Bipolaris	Fungi
CC1(C)CC[C@@]2(C(=O)O)[C@@H](C1)C1=CC[C@@H]3[C@@]4(C)C[C@H](O)[C@H](O)[C@@](C)(C(=O)O)[C@@H]4CC[C@@]3(C)[C@]1(C)C[C@H]2O	2020	New modifications	Triterpenoids	Medicago	Viridiplantae
C=C1C(=O)OC[C@H]2[C@@H]1C[C@H](O)[C@@H]2CO	2020	New modifications	Monoterpenoids	Patrinia	Viridiplantae
C=C[C@@](C)(O)CC/C=C(\C)C(=O)O[C@H]1C[C@]2(C(=O)O)CC[C@]3(C)C(=CCC4[C@@]5(C)CC[C@H](O[C@H]6O[C@H](CO)[C@@H](O[C@@H]7OC[C@@H](O)[C@H](O)[C@H]7O)[C@H](O)[C@H]6O[C@@H]6OC[C@@H](O[C@H]7OC[C@@H](O)[C@H](O)[C@H]7O)[C@H](O[C@@H]7O[C@H](CO)[C@@H](O)[C@H](O)[C@H]7O[C@@H]7OC[C@@H](O)[C@H](O)[C@H]7O)[C@H]6O)C(C)(C)C5CC[C@]43C)C2CC1(C)C	2020	Site combinations	Triterpenoids	Erythrophleum	Viridiplantae
C=C(C)[C@@H]1CC[C@]2(C)[C@H](CC=C3[C@@H]4[C@@H](C)[C@H](C)CC[C@]4(C)CC[C@]32C)[C@@]1(C)CCC(=O)O	2020	New modifications	Triterpenoids	Quercus	Viridiplantae
C=C(CC[C@H](C)[C@H]1CC[C@H]2C3=C(C(=O)C[C@@]21C)[C@@]1(C)CCC(=O)[C@H](C)[C@@H]1C[C@H]3O)[C@@H](C)C(=O)O	2020	New modifications	Steroids	Taiwanofungus	Fungi
CC1(C)CC[C@]2(C(=O)O[C@H]3O[C@H](CO)[C@@H](O)[C@H](O)[C@H]3O)CC[C@]3(C)C(=CCC4[C@@]5(C)C[C@@H](O)[C@H](O[C@H]6O[C@H](COC(=O)c7cc(O)c(O)c(O)c7)[C@@H](O)[C@H](O)[C@H]6O)[C@@](C)(C(=O)O)C5CC[C@]43C)[C@@H]2[C@@H]1O	2020	New sites	Triterpenoids	Quercus	Viridiplantae
CC1=C2[C@@H](O)C[C@H](C)[C@@H]3C[C@@H]2[C@@H](CO)CO[C@H]1C3=O	2020	New skeletons	Sesquiterpenoids	Daphne	Viridiplantae
CC(C)C[C@H]1C[C@]2(CC[C@@H]3C[C@H]2C3(C)C)OC2=C1C(=O)C(C)(C)C(=O)C2(C)C	2020	New modifications	Meroterpenoids	Rhodomyrtus	Viridiplantae
C=C1[C@H]2C[C@@]3(CC[C@H]4[C@@](C)(CCC[C@@]4(C)C(=O)O)[C@@H]3C[C@H]2O)[C@H]1O	2020	New sites	Diterpenoids	Cunninghamella	Fungi
CO[C@H]1C2=C(C(=O)N1CC(=O)O)[C@]1(C)[C@@H](C[C@H]2OC)[C@]2(C)CC[C@H]3C(C)(C)CCC[C@]3(C)[C@H]2C[C@H]1O	2020	New sites	Sesterterpenoids	Hyrtios	Metazoa
CC(=O)O[C@H]1/C(C)=C/[C@H]2[C@@H](C[C@@H](OC(=O)CCc3ccccc3)/C(CO)=C/[C@H]1O)[C@]2(C)CO	2020	New modifications	Sesquiterpenoids	Plagiochila	Viridiplantae
CC1OC(OC2C(CO)OC(OC3CCC4(C)C(CCC5(C)C4CC=C4C6CC(C)(C)CCC6(CO)CCC45C)C3(C)CO)C(O)C2O)C(O)C(O)C1OC1CC(O)C(O)C(O)O1	2020	New sites	Triterpenoids	Nigella	Viridiplantae
CC[C@@]12C=CC[N@+]3(CC[C@@]4(C/C=C/c5ccc(O)c(OC)c5)c5ccccc5N[C@]43CC1)C2	2020	New skeletons	Others	Callichilia	Viridiplantae
C=Cc1cc2c(cc1OC)[C@]1(C)CC[C@@H](O)C(C)(C)[C@H]1CC2	2020	Site combinations	Diterpenoids	Flueggea	Viridiplantae
C[C@H]1[C@H](O)C[C@@H]2[C@H]([C@H]3C[C@@H]4C=CC(=O)C[C@H]4C[C@H]3C2(C)C)[C@H]1O	2020	New skeletons	others	Aspergillus	Fungi
CC(=O)OC[C@]1(O)C[C@@H]2C(=O)C[C@H]3C(C)(C)[C@H](O)CC[C@]3(C)[C@]23CC[C@H]1C3	2020	New sites	Diterpenoids	Botrytis	Fungi
CC(=O)O[C@@H]1[C@](C)(O)[C@H](O)[C@@H]2C(=O)[C@]3(C=C(C)[C@H](O)[C@@]13O)[C@H](C)C[C@@H]1[C@H]2[C@]1(C)CO	2020	Site combinations	Diterpenoids	Euphorbia	Viridiplantae
CC1(C)CCC=C([C@]2(O)CC=C(C(=O)O)CC2)C1	2020	New sites	Sesquiterpenoids	Zea	Viridiplantae
CC(C)=CC[C@H]1C[C@]2(CC=C(C)C)C(=O)[C@]3(CCC(C)(C)O)O[C@@]1(C(=O)C(C)C)[C@@]2(O)C(C)(C)C3=O	2020	New sites	Meroterpenoids	Garcinia	Viridiplantae
CC(=O)O[C@@H]1CC/C(C)=C\[C@H](O)C[C@@](C)(O)/C=C/[C@]2(C(C)C)CC[C@@]1(C)O2	2020	New modifications	Diterpenoids	Boswellia	Viridiplantae
C=C1[C@@H](OC(C)=O)[C@H]2[C@]3(C)C=CC(=O)C(C)(C)[C@H]3C(=O)[C@]3(O)OC4=C(C)OC(=O)[C@@]1(C)[C@]4(C(=O)OC)[C@]23C	2020	New modifications	Meroterpenoids	Aspergillus	Fungi
O=C(/C=C/c1ccccc1O[C@@H]1O[C@H](CO)[C@@H](O)C(O)[C@H]1O)O[C@@H]1[C@@H]2O[C@]2(CO)[C@H]2[C@H](O[C@@H]3O[C@H](CO)[C@@H](O)[C@H](O)[C@H]3O)OC=C[C@@H]12	2020	Site combinations	Monoterpenoids	Callicarpa	Viridiplantae
CC(=O)OC[C@]12CC[C@@H](O1)[C@@](C)(O)CC/C(C(C)C)=C\C=C(/C)CC[C@@H]2O	2020	Site combinations	Diterpenoids	Lobophytum	Metazoa
C[C@H]1O[C@@H]2C[C@]13C=CCN1CC[C@]4(C(=O)c5ccccc5N24)[C@H]13	2020	New skeletons	Others	Kopsia	Viridiplantae
C/C=C(/CO)CC[C@H](C)[C@H]1CC[C@H]2C3=C(C(=O)C[C@@]21C)[C@@]1(C)CC[C@H](O)[C@](C)(O)[C@@H]1C[C@H]3O	2020	New modifications	Triterpenoids	Taiwanofungus	Fungi
C[C@@]12CC=C(C(=O)OC3OC(CO)C(O)C(O)C3O)[C@@H](C1)[C@]1(C)CC[C@H](O)[C@]21C	2020	Site combinations	Sesquiterpenoids	Pentarhizidium	Viridiplantae
C=C1C2=C([C@H](O)C[C@]34C[C@@](C)(O)[C@H](CC[C@@H]13)[C@H]4OC(C)=O)C(C)(C)[C@@H](O)C2	2020	Site combinations	Diterpenoids	Rhododendron	Viridiplantae
CC(C)=CCC[C@H](C)[C@@H]1CC[C@@H](C)c2ccc(C)cc21	2020	New modifications	Diterpenoids	Leucophyllum	Viridiplantae
C/C1=C\C=C(\C(C)C)[C@@H](O)C/C(C)=C/CC/C(C)=C/CC1	2020	New modifications	Diterpenoids	Sarcophyton	Metazoa
COC(=O)C1=CO[C@@H](O[C@@H]2O[C@H](CO)[C@@H](O)[C@H](O)[C@H]2O)[C@@H]2[C@H](C)O[C@H](OC[C@@]3(O)O[C@H](CO)[C@@H](O)[C@@H]3O)C[C@H]12	2020	New modifications	Monoterpenoids	Cornus	Viridiplantae
CC(C)=CCC/C(C)=C/C[C@]1(CC=C(C)C)C(=O)C(C(=O)c2ccccc2)=C2O[C@]3(CC/C=C(\C)CCCC(C)(C)[C@@H]4O[C@H]43)C[C@]2(CC=C(C)C)C1=O	2020	New skeletons	Meroterpenoids	Hypericum	Viridiplantae
COC[C@@]1(O)[C@@H](OC(=O)CC(C)C)C[C@]2(O)C(COC(=O)CC(C)C)=CO[C@@H](OC(=O)CC(C)C)[C@@H]21	2020	New modifications	Monoterpenoids	Patrinia	Viridiplantae
CCCCCC[C@@H]1O[C@@H]2C3=C(CC[C@@H](O)C3=O)O[C@@H]2[C@@H]1O	2020	New skeletons	Others	Trichoderma	Fungi
C=C(C(=O)OCC)[C@@H]1[C@@H](OC(=O)C(C)CC)C[C@]2(C)[C@H](C(C)=CC[C@H]2O)[C@H]1O	2020	New modifications	Sesquiterpenoids	Artemisia	Viridiplantae
CC(C)=CC(=O)CC(C)[C@H]1C=C[C@](O)(CO)CC1	2020	New modifications	Sesquiterpenoids	Curcuma	Viridiplantae
COC(=O)C(OC(C)=O)[C@H]1C(C)(C)[C@H](OC(C)=O)[C@]2(O)C[C@]3(O)C4=CC(=O)O[C@@H](c5ccoc5)[C@]4(C)CC[C@@H]3[C@@]1(C)C2=O	2020	New modifications	Triterpenoids	Xylocarpus	Viridiplantae
CO[C@@]12CCC3=CCC[C@@H](C)[C@@]3(C)C1=C(C)C(=O)N2	2020	New modifications	Sesquiterpenoids	Undefined	Others
CO[C@]12CCC3=CCC[C@@H](C)[C@@]3(C)C1=C(C)C(=O)N2	2020	New modifications	Sesquiterpenoids	Undefined	Others
CC1=C2C(=O)OC[C@@H](C(=O)O)[C@H]2CC1	2020	New modifications	Monoterpenoids	Linaria	Metazoa
CC(=O)[C@@H]1CC[C@@H]2[C@@H](O)[C@@]1(C[C@H]1OC(=O)C(C)(C)[C@]1(O)CCO)C[C@@]2(C)O	2020	New modifications	Diterpenoids	Pieris	Viridiplantae
CC(=O)[C@H]1[C@@H](OC=O)CCC2=CCC[C@H](C)[C@]21C	2020	New modifications	Sesquiterpenoids	Litophyton	Metazoa
CC(=O)OCC1=CO[C@@H](OC(=O)CC(C)C)[C@@H]2C1=C[C@@H](OC(=O)CC(C)C)[C@]21CO1	2020	New modifications	Monoterpenoids	Valeriana	Viridiplantae
Cc1cc(C2=C(C(C)C)CC[C@H]2C)oc(=O)c1O	2020	New sites	Sesquiterpenoids	Rhodotus	Fungi
CC(C)=CCC[C@H](C)[C@H]1CC[C@]2(C)C[C@@H]3C(C)=CC(=O)[C@H]3/C(CO)=C\C[C@@H]12	2020	New sites	others	Aspergillus	Fungi
C=C1[C@@H](O)C[C@H](O)[C@@]2(C)[C@@H](OC(C)=O)[C@H](OC(C)=O)C3=C(C)[C@@H](OC(C)=O)C[C@@H]([C@@H](OC(C)=O)[C@H]12)C3(C)C	2020	New modifications	Diterpenoids	Taxus	Viridiplantae
C=C(C)[C@H]1CC[C@]2(C(=O)O)CC[C@]3(C)[C@H](CC[C@@H]4[C@@]5(C)[C@H](C(=O)OC)[C@@H](OC(=O)c6ccccc6)C(C)(C)[C@@H]5C[C@@H](CC(=O)c5ccccc5)[C@]43C)[C@@H]12	2020	New skeletons	Triterpenoids	Colubrina	Viridiplantae
C=C1C[C@H]2OC(=O)[C@@]3(C[C@]45C(=C(C)[C@@H]3[C@@H]4O)C[C@@H]3C(=C)C(=O)O[C@H]3C[C@@H]5C)[C@H]2CC2C1C(OC(C)=O)C[C@@]2(C)O	2020	New modifications	Sesquiterpenoids	Inula	Viridiplantae
COC(=O)/C=C(/C)CC/C=C(\C)C/C=C/C(C)=O	2020	New modifications	Sesquiterpenoids	Aphanamixis	Viridiplantae
C=C1[C@@H](O)[C@H]2[C@@H](C[C@@H](O)/C(COC(=O)CCc3ccccc3)=C/[C@@H](O)[C@H]1OC(C)=O)[C@]2(C)CO	2020	New modifications	Sesquiterpenoids	Plagiochila	Viridiplantae
CC(=O)OCC1=C[C@@H](O)[C@H]2C(C(=O)O)=CO[C@H](O[C@@H]3O[C@H](CO)[C@@H](O)[C@H](O)[C@H]3O)[C@@H]12	2020	New modifications	Monoterpenoids	Orobanche	Viridiplantae
CC(=O)O[C@H]1C[C@H]2[C@@](C)(CC[C@H]3C(C)(C)CCC[C@@]32CO)[C@@H]2CC=C(C(C)=O)[C@H](C=O)[C@@]12C	2020	New modifications	Sesterterpenoids	Lendenfeldia	Metazoa
CC(C)c1cc2c(cc1O)C(=O)C(=O)[C@H]1C(C)(C)CCC[C@]21C	2020	New modifications	Diterpenoids	Dacrycarpus	Viridiplantae
C[C@@H]1OC(=O)C2=C1CC[C@@H]1[C@]2(C)[C@@H](O)C[C@H]2[C@@]1(C)CC[C@H]1C(C)(C)CCC[C@@]12CO	2020	New modifications	Sesterterpenoids	Lendenfeldia	Metazoa
C[C@H]1C[C@]2(C[C@@H](C)[C@H]3[C@@H](C[C@@]4(C)[C@@H]5CC[C@H]6C(C)(C)C(=O)CC[C@@]67C[C@@]57CC[C@]34C)O2)OC1=O	2020	New modifications	Triterpenoids	Pseudolarix	Viridiplantae
CCCCCC[C@H](O)[C@@H]1C[C@@H](OC)C2=C(O1)[C@@H](O)CCC2=O	2020	New skeletons	Others	Trichoderma	Fungi
C=C[C@@]1(C)CC[C@H](C(O)(CO)C(=O)OC)C[C@@H]1C(=C)C	2020	Site combinations	Sesquiterpenoids	Aquilaria	Viridiplantae
COC(=O)[C@H]1[C@H](O)[C@H](O)C[C@H]2CN3CCc4c([nH]c5cc(OC)ccc45)[C@@H]3C[C@@H]21	2020	New sites	Meroterpenoids	Rauvolfia	Viridiplantae
C=C(C)[C@H]1CC[C@]2(C(=O)O)CC[C@]3(C)[C@H](CC[C@@H]4[C@@]5(C)[C@H](C(=O)OC)[C@@H](OC(C)=O)C(C)(C)[C@@H]5C[C@@H](CC(=O)c5ccccc5)[C@]43C)[C@@H]12	2020	New skeletons	Triterpenoids	Colubrina	Viridiplantae
C[C@H]1CCC[C@@]2(C)[C@@H](O)C[C@@H](O)C[C@H]12	2020	Site combinations	Sesquiterpenoids	Streptomyces	Bacteria
COc1cc2c(c(O)c1C)C(=O)C[C@H]1C2=CC(=O)[C@@H](O)C1(C)C	2020	New sites	Diterpenoids	Aspidopterys	Viridiplantae
CC1O[C@@H](O[C@H]2C(O)[C@@H](O)CO[C@H]2O[C@H]2CC[C@@]3(C)C(CC[C@]4(C)C3CC=C3[C@@H]5CC(C)(C)CC[C@]5(C(=O)O[C@@H]5OC(CO[C@@H]6OC(CO)[C@@H](O)C(O)[C@@H]6O)[C@@H](O)C(O)[C@@H]5O)CC[C@]34C)[C@]2(C)CO)C(O)[C@@H](O[C@@H]2OC(CO)[C@@H](O)C(O[C@@H]3OC(C)[C@H](OC4OC(CO)C(OC5OC(CO)C(O)[C@H](O)[C@@H]5O)[C@@H](O[C@@H]5OC(C)C(O)[C@H](O)[C@@H]5O)[C@@H]4O)[C@H](O)C3O)[C@@H]2O)C1O	2020	New modifications	Triterpenoids	Scabiosa	Viridiplantae
C=CC(C)(O)CC/C=C(\C)CC/C=C(\C)CO[C@@H]1O[C@H](CO)[C@@H](O)[C@H](O)[C@H]1O	2020	New modifications	Sesquiterpenoids	Sideritis	Viridiplantae
C[C@@]12[C@H](O)C[C@H]3O[C@]4(C=C(CO)CC[C@]14C)O[C@]32CO	2020	New modifications	Sesquiterpenoids	Trichoderma	Fungi
C=C1C(O)[C@]2(O)OC[C@@]34[C@H]1CC(=O)O[C@@H]3C[C@H]1C(C)=CC(=O)[C@@H](O)[C@]1(C)[C@H]42	2020	New modifications	Triterpenoids	Ailanthus	Viridiplantae
C=C[C@]1(C)C=C2[C@@H](OC)C[C@H]3[C@@](C)(CO)CCC[C@]3(C)[C@H]2CC1	2020	New modifications	Diterpenoids	Callicarpa	Viridiplantae
CC(=O)O[C@@H]1C[C@]2(C)C(=CCC3[C@@]4(C)CC[C@H](O[C@@H]5O[C@H](CC(=O)O)[C@@H](O)[C@H](O[C@@H]6O[C@H](CO)[C@@H](O)[C@H](O)[C@H]6O)[C@H]5O[C@@H]5O[C@H](CO)[C@@H](O)[C@H](O)[C@H]5O)C(C)(C)C4CC[C@]32C)C2CC(C)(C)C[C@H](O)[C@@]21CO	2020	New modifications	Triterpenoids	Impatiens	Viridiplantae
C=C[C@H]1[C@H](O[C@@H]2O[C@H](CO)[C@@H](O)[C@H](O)[C@H]2O)OC=C(C(=O)OC)[C@H]1CC=O	2020	New modifications	Monoterpenoids	Nothapodytes	Viridiplantae
CC(=O)O[C@H]1CC[C@]2(C)[C@H]3CC[C@@]4(C)[C@H]([C@H](CCC=C(C)C)C(=O)O)CC[C@]4(C)C3=CC[C@H]2C1(C)C	2020	New modifications	Triterpenoids	Boswellia	Viridiplantae
C=CC(C)(O)CC/C=C(\C)CO[C@H]1OC(CO)[C@@H](O)C(O)[C@H]1O	2020	New modifications	Monoterpenoids	Solanum	Viridiplantae
C/C=C/[C@H]1C[n+]2cc(C[C@H](C(=O)OC)[C@H]3CC4c5[nH]c6ccccc6c5CCN4C/C3=C/C)c3c([nH]c4ccccc43)c2C[C@@H]1CCO	2020	New skeletons	Meroterpenoids	Picralima	Viridiplantae
CC(=O)O[C@H]1[C@@H](CO)[C@H](O)[C@@H](O)[C@H](O)[C@H]1O[C@@H]1[C@@H](O)[C@H](O[C@@H]2O[C@H](CO)[C@@H](O)[C@H](O)[C@H]2O)[C@@H](CO)O[C@@H]1OC(C)=O	2020	New sites	Others	Isodon	Viridiplantae
CCCCCCCCCCCCCCCC(=O)OC[C@@]1(O)C[C@@]23CC[C@@H]4C5=CC(=O)NC5=CC[C@@]4(C)[C@@H]2CC[C@@H]1C3	2020	New modifications	Diterpenoids	Coffea	Viridiplantae
CC(C)(O)[C@H]1C[C@H]2[C@@H]3C(=O)CC[C@@]2(C)C[C@H]13	2020	New skeletons	Others	Trichoderma	Fungi
COc1ccc(C(=O)O[C@H]2C[C@@]3(C)C(C[C@@]2(C)CO)[C@H]2C(=O)CC4[C@@]5(C)CC[C@H](O[C@@H]6OC[C@H](O[C@@H]7O[C@H](CO)[C@@H](O)[C@H](O)[C@H]7O)[C@H](O)[C@H]6O[C@@H]6O[C@H](CO)[C@@H](O)[C@H](O)[C@H]6O)[C@@](C)(CO)C5CC[C@@]4(C)[C@]2(C)C[C@@H]3O)cc1O	2020	New sites	Triterpenoids	Avena	Viridiplantae
CC(=O)O[C@H]1CC[C@]2(C)C3=C(CC[C@H]2C1(C)C)[C@]1(C(=O)O)CC[C@H]([C@H](C)CCC=C(C)C)[C@@]1(C)CC3	2020	New modifications	Triterpenoids	Penares	Metazoa
CC1=C2C(=CC[C@@]34COC(=O)C3=CCC[C@H]14)C(=O)O[C@H]2c1ccoc1	2020	New modifications	Diterpenoids	Salvia	Viridiplantae
CC1(C)CC[C@]2(C)CC[C@]3(C)C(=C[C@@H](O)C4[C@@]5(C)C[C@@H](O)[C@H](O)C(C)(C)C5CC[C@]43C=O)C2C1	2020	New sites	Triterpenoids	Salvia	Viridiplantae
CC1(C)CCC=C(C2(O)CC=C(C(=O)O)CC2)C1	2020	New sites	Sesquiterpenoids	Zea	Viridiplantae
COC(=O)C(O)(CO)[C@H]1CC[C@@]2(C)CCC[C@@](C)(O)[C@H]2C1	2020	Site combinations	Sesquiterpenoids	Aquilaria	Viridiplantae
C=C(CO)CCC[C@]1(C)C(=O)[C@H](O)C[C@@]23C[C@@H](CC[C@@H]12)[C@](C)(O)C3	2020	New sites	Diterpenoids	Pieris	Viridiplantae
C=C(C)c1cc2c(C)cc(=O)c(CC)cc2c(OC)c1OC	2020	New skeletons	Sesquiterpenoids	Dulacia	Viridiplantae
CC1(C)CC2C3=CCC4[C@@]5(C)CC[C@H](O[C@@H]6O[C@H](CO)[C@@H](O[C@@H]7OC[C@@H](O)[C@H](O)[C@H]7O)[C@H](O)[C@H]6O[C@@H]6OC[C@@H](O[C@@H]7OC[C@@H](O)[C@H](O)[C@H]7O)[C@H](O)[C@H]6O)C(C)(C)C5CC[C@@]4(C)[C@]3(C)CC[C@@]2(C(=O)O)C[C@@H]1OC(=O)/C=C/c1ccccc1	2020	Site combinations	Triterpenoids	Erythrophleum	Viridiplantae
C=C(C)[C@@H]1CC[C@H](C)[C@]2(O)CC(=O)C(C)=C2C1	2020	New modifications	Sesquiterpenoids	Stellera	Viridiplantae
CC(=O)O[C@@H]1CC[C@]2(C)[C@H](C[C@H](O)[C@]34C=C(C)[C@H](CC[C@H]32)C4)C1(C)C	2020	Site combinations	Diterpenoids	Sideritis	Viridiplantae
C=C[C@]1(C)CC[C@@H](C(C)(C)OC(C)=O)C[C@H]1C(=C)C	2020	New modifications	Sesquiterpenoids	Valeriana	Viridiplantae
CC1(C)CCC=C(C2=CC=C(C(=O)O)CC2)C1	2020	New modifications	Sesquiterpenoids	Zea	Viridiplantae
C/C(=C\[C@H]1C[C@@]2(C)OC3=C(C[C@H]2O1)C(=O)[C@H](O)CC3)CCCC(C)C(=O)O	2020	Site combinations	Meroterpenoids	Stemphylium	Fungi
COc1cc(C(=O)O[C@@H]2[C@@H]3O[C@]3(CO)[C@H]3[C@H](O[C@@H]4O[C@H](CO[C@H]5O[C@H](CO)[C@@H](O)[C@H](O)[C@H]5O)[C@@H](O)[C@H](O)[C@H]4O)OC=C[C@@H]23)ccc1O	2020	New modifications	Monoterpenoids	Picrorhiza	Viridiplantae
COC1C=C2C3CC(C)(C)CC[C@]3(C(=O)O)CC[C@@]2(C)[C@]2(C)CCC3C(C)(C)C(=O)CC[C@]3(C)C12	2020	New sites	Triterpenoids	Liquidambar	Viridiplantae
CC1=CC(=O)[C@H]2/C(C=O)=C\C[C@H]3[C@@](O)([C@@H](C)CCCC(C)(C)O)CC[C@]3(C)C[C@H]12	2020	New sites	others	Bipolaris	Fungi
CC(=O)OC(C)(C)CCC(=O)[C@](C)(O)[C@H]1[C@H](O)C[C@@]2(C)[C@@H]3CC=C4C(=COC(=O)C4(C)C)[C@]3(C)C(=O)C[C@]12C	2020	New modifications	Triterpenoids	Herpetospermum	Viridiplantae
CC(C)=C1C[C@H]2[C@@H](CC[C@@]2(C)O)[C@@H](C)CC1=O	2020	New modifications	Sesquiterpenoids	Artemisia	Viridiplantae
C=C(C)C(=O)O[C@H]1[C@H]2C(=C)C(=O)O[C@@H]2C[C@@H](C)/C=C\C(=O)[C@@](C)(O)[C@@H]1OC(C)=O	2020	New modifications	Sesquiterpenoids	Calea	Viridiplantae
C[C@@H]1C[C@@]23CC[C@@H]4C(C)(C)C(=O)CC[C@@]4(C)[C@@H]2[C@@H](O)[C@@H]1CC3	2020	Site combinations	Diterpenoids	Excoecaria	Viridiplantae
C=C1CCC[C@@H]2[C@]1(C)CC[C@H](C)[C@@]2(C)Cc1cc(O)cc2c1oc(=O)n2C	2020	New modifications	Meroterpenoids	Dysidea	Metazoa
CC(=O)O[C@@H]1[C@H](O)[C@@]2(C)C3CCC4=C(C)C(=O)[C@@H](O[C@@H]5O[C@H](CO)[C@@H](O)[C@H](O)[C@H]5O)C[C@H]4[C@]3(C)C(=O)C[C@]2(C)[C@H]1[C@@](C)(O)C(=O)/C=C/C(C)C	2020	New sites	Triterpenoids	Mareya	Viridiplantae
CC1=C2C[C@@H](C(C)(O)CO)CCC(C=O)=C2CC1=O	2020	New modifications	Sesquiterpenoids	Wikstroemia	Viridiplantae
C[C@@H](CC(=O)C[C@@H](C)[C@H]1CC[C@@]2(C)[C@@H]3CC[C@H]4C(C)(C)C(=O)CC[C@@]45C[C@@]35CC[C@]12C)C(=O)O	2020	New modifications	Triterpenoids	Pseudolarix	Viridiplantae
C=C(C)[C@@H]1CCC2=C[C@H](C[C@@](C)(O)[C@H](O)c3cc(C=O)c(o3)C1)OC2=O	2020	New modifications	Diterpenoids	Leptogorgia	Metazoa
C=C1CC[C@]2(C(=O)O[C@@H]3O[C@H](CO)[C@@H](O)[C@H](O)[C@H]3O)CC[C@]3(C)C(=CCC4[C@@]5(C)C[C@@H](O)[C@H](O)[C@@](C)(CO)C5[C@H](O)C[C@]43C)C2[C@H]1C	2020	New sites	Triterpenoids	Syzygium	Viridiplantae
C=C1CC[C@H]2[C@@H](/C=C(\C)[C@H](OC(C)=O)[C@H](OC(C)=O)[C@@H]1OC(C)=O)C2(C)C	2020	New modifications	Sesquiterpenoids	Plagiochila	Viridiplantae
CC(=O)O[C@H]1O[C@@H]2OC(=O)[C@@H](C)c3c([C@@]4(C)CCCC(C)(C)C4)ccc1c32	2020	New modifications	Diterpenoids	Dendrilla	Metazoa
CC1=C2C[C@H]3[C@H](CC[C@]3(C)O)[C@@](C)(O)C[C@@H]2OC1=O	2020	New modifications	Sesquiterpenoids	Curcuma	Viridiplantae
CC(=O)OC(C)(C)CCC(=O)[C@](C)(O)[C@H]1[C@H](O)C[C@@]2(C)[C@@H]3CC=C4[C@@H](CC(=O)OC4(C)C)[C@]3(C)C(=O)C[C@]12C	2020	New sites	Triterpenoids	Trichosanthes	Viridiplantae
C[C@@H]1C[C@]23CC[C@H]([C@H]1O)[C@H]2[C@]1(C)CC[C@@H](O)C(C)(C)[C@H]1CC3	2020	New skeletons	Diterpenoids	Excoecaria	Viridiplantae
CC(=O)OC[C@@H]1CC[C@H]([C@@]2(C)CCCC(C)(C)C2)C2=C1C(=O)O[C@@H]2C	2020	New modifications	Diterpenoids	Dendrilla	Metazoa
C=C[C@@]1(C)C=C2C=C[C@H]3[C@@](CO)(C(=O)O)CCC[C@]3(C)[C@H]2CC1	2020	New modifications	Diterpenoids	Callicarpa	Viridiplantae
C=C[C@@]1(O)[C@@H](O)C[C@H]2[C@@H](CC[C@H]3[C@](C)(CO)CCC[C@]23C)[C@H]1C	2020	Site combinations	Diterpenoids	Erythrophleum	Viridiplantae
C=C1CCC2[C@](C)(COC(=O)C(N)CCC(=O)O)[C@H](O)CC[C@@]2(C)[C@@H]1[C@@H](O)CC1=CCOC1=O	2020	New modifications	Diterpenoids	Andrographis	Viridiplantae
C=C1CC[C@@H]2[C@@H](C)CC[C@H](C(C)(C)O)[C@@H]2/C=C(\C)CC[C@H]1O	2020	New sites	Diterpenoids	Plagiochila	Viridiplantae
CO[C@H]1C=C2[C@@H](C)[C@@H]3[C@H](O)[C@H](OC(=O)C=Cc4ccccc4)[C@@]4(O)C(C)(C)CCC[C@]4(C)[C@H]3C[C@@]2(OC)O1	2020	New modifications	Diterpenoids	Caesalpinia	Viridiplantae
C[C@H]1c2ccoc2C[C@H]2[C@H]1C[C@@H](OC(=O)c1ccccc1)[C@@]1(O)[C@@](C)(C(=O)O)[C@@H](OC(=O)c3ccccc3)CC[C@]21C	2020	Site combinations	Diterpenoids	Caesalpinia	Viridiplantae
C[C@]12C[C@H](OC(=O)c3ccccc3)[C@](C)(C=O)CC1[C@@]1(O)C(=O)CC3[C@@]4(C)CC[C@H](O[C@@H]5OC[C@H](O[C@@H]6O[C@H](CO)[C@@H](O)[C@H](O)[C@H]6O)[C@H](O)[C@H]5O[C@@H]5O[C@H](CO)[C@@H](O)[C@H](O)[C@H]5O)[C@@](C)(CO)C4CC[C@@]3(C)[C@]1(C)C[C@@H]2O	2020	New sites	Triterpenoids	Avena	Viridiplantae
CC(O)(CO)[C@@H]1CC[C@@]2(C)[C@H](O)CC[C@@](C)(O)[C@@H]2C1	2020	New modifications	Sesquiterpenoids	Solanum	Viridiplantae
COc1ccc(C(=O)O[C@@H]2[C@H]3C[C@@H](O)[C@H](C3)C2(C)C)cc1	2020	New sites	Monoterpenoids	Ferula	Viridiplantae
CC(=O)O[C@H]1OC=C(CO)[C@@H]2C3[C@@H](CC[C@@]4(CO4)[C@H]12)[C@]3(CO)COC(=O)/C=C/c1ccccc1	2020	New modifications	Sesquiterpenoids	Plagiochila	Viridiplantae
CC(=O)[C@H](C)CCC[C@@H](C)[C@@H]1C[C@H](O)[C@H](C)C(=O)O1	2020	New modifications	Sesquiterpenoids	Penicillium	Fungi
C=C(C)[C@H]1CC[C@]2(C(=O)O)CC[C@]3(C)[C@H](CC[C@@H]4[C@@]5(C)C(C=O)=CC(C)(C)[C@@H]5CC[C@]43C)[C@@H]12	2020	New modifications	Triterpenoids	Colubrina	Viridiplantae
CC(=O)O[C@H]1C[C@H]2C(C)(C)C(=O)C=C[C@]2(C)C2CC[C@]3(C)C(=CC[C@H]3[C@H]3CO[C@]4(C(C)(C)O)O[C@H]4C3)[C@@]21C	2020	New modifications	Triterpenoids	Entandrophragma	Viridiplantae
CC(=O)O[C@@H]1C[C@@](C)([C@H]2OC(=O)C[C@@H]2CO)C2=CC(=O)O[C@@H]3C[C@H]4[C@H](C)C=CC(=O)[C@]4(C)[C@@H]1[C@]23C	2020	New modifications	Triterpenoids	Eurycoma	Viridiplantae
CC(=O)O[C@@H]1C[C@@]2(C)C(CC[C@]3(C)C2[C@H](O)C=C2C4[C@@H](C)[C@@](C)(O)CC[C@]4(C)CC[C@]23C)C(C)(C)[C@H]1O	2020	New sites	Triterpenoids	Salvia	Viridiplantae
CO[C@H]1OC(=O)C=C1CC[C@@]1(C)C2=CCC[C@@](C)(CCCC(C)(C)OC)[C@@H]2CC[C@H]1C	2020	New sites	Sesterterpenoids	Dactylospongia	Metazoa
C=C1[C@@H](O)C[C@@H]2C(COC(=O)CC(C)C)=CO[C@@H](OC(=O)CC(C)C)[C@H]12	2020	New modifications	Monoterpenoids	Patrinia	Viridiplantae
CC1(C)[C@@H]2CC[C@](C)(O)[C@@H]3CC[C@](C)(O[C@@H]4O[C@H](CO)[C@@H](O)[C@H](O)[C@H]4O)[C@H]3[C@@H]21	2020	New modifications	Sesquiterpenoids	Syzygium	Viridiplantae
C[C@H](CO[C@@H]1O[C@H](CO)[C@@H](O)[C@H](O)[C@H]1O)[C@@H]1CCC(CO)=C2CCC(CO)=C[C@H]21	2020	New sites	Sesquiterpenoids	Balanophora	Viridiplantae
CCN1C[C@]2(COC)CC[C@H](OC)C34C1OC(C=C1C[C@H](O)C5C[C@@H]3[C@@H]1[C@H]5O)C42	2020	New skeletons	Diterpenoids	Aconitum	Viridiplantae
C=C1[C@H](OC(=O)c2ccccc2)[C@@H](O)C(=O)C(C)(C)[C@H](O)[C@H](O)[C@H](C)C(=O)[C@]2(O)[C@@H]([C@H]1OC(=O)c1ccccc1)[C@@H](OC(C)=O)[C@](C)(O)[C@@H]2O	2020	New modifications	Diterpenoids	Euphorbia	Viridiplantae
C=C(C)[C@]1(O)CC[C@]2(C)[C@H](CC=C(C)[C@@]23C=C(C(=O)O)/C(=C\C(=O)c2cccnc2)O3)[C@@]12CCC(=O)OC2	2020	New modifications	Meroterpenoids	Penicillium	Fungi
CC(=O)O[C@@H]1CC[C@]2(C)[C@H]3CC[C@@]4(C)C(=C3CC[C@H]2C1(C)C)C[C@@H]1OC(=O)[C@H](CC(=O)C=C(C)C)[C@@H]14	2020	New modifications	Triterpenoids	Tricholoma	Fungi
CCCC(=O)N[C@@H](c1ccccc1)[C@@H](O)C(=O)O[C@H]1C[C@@]2(O)[C@@H](OC(=O)c3ccccc3)[C@H]3[C@](C)(C(=O)[C@H](OC(C)=O)C(=C1C)C2(C)C)[C@@H](O)C[C@H]1OC[C@]13OC(C)=O	2020	New modifications	Diterpenoids	Taxus	Viridiplantae
CCOCCC(=O)O[C@@H](C[C@H](O)[C@@](C)(O)CCC=C(C)C)/C(C)=C/CO[C@@H]([C@@H](O)[C@@H](O)CO)[C@H](O)CO	2020	New modifications	Sesquiterpenoids	Fusarium	Fungi
CC1C(NO)CC2(O)CCCC(C)(C)C23CC13	2020	New skeletons	Others	Alocasia	Viridiplantae
C=C1CCC[C@]2(C)Cc3oc(C(c4ccc(CO)o4)c4oc5c(c4C)C[C@H]4C(=C)CCC[C@]4(C)C5)c(C)c3C[C@@H]12	2020	New skeletons	others	Atractylodes	Viridiplantae
C=C[C@@]1(C)CC[C@]2(C)C(=O)[C@@]3(CC[C@H]2C1)[C@H](O)CCC3(C)C	2020	New skeletons	Triterpenoids	Euphorbia	Viridiplantae
C=C1CC[C@H]2[C@@](C)(C(=O)O[C@@H]3O[C@H](CO)[C@@H](O)[C@H](O)[C@H]3O)C(O)CC[C@]2(C)[C@H]1CCC1=CCOC1=O	2020	New modifications	Diterpenoids	Pinus	Viridiplantae
CC1(C)C2=C(CC[C@H]1O)[C@@]1(C)CC[C@](C)([C@@H](O)CO)C[C@@H]1C=C2	2020	New modifications	Diterpenoids	Triadica	Viridiplantae
CC(C)(O)[C@@H]1CC[C@H]([C@H]2CC[C@@]3(C)C4=C(C(=O)C[C@]23C)[C@@]2(C)CC[C@H](O)C(C)(C)[C@@H]2CC4=O)[C@H]1O	2020	New modifications	Triterpenoids	Inonotus	Fungi
CC1(O)C(O)CC2C3CCC4(C)C(OC5OC(CO)C(O)C(O)C5O)CCC34C21	2020	New skeletons	Sesquiterpenoids	Aster	Viridiplantae
COC[C@@H](C(=O)OC)[C@@H]1C[C@H](O)[C@@H]2[C@]3(C1)C(=O)OC[C@]21[C@@H](OC(C)=O)CCC(C)(C)[C@H]1[C@@H]3O	2020	New sites	Diterpenoids	Isodon	Viridiplantae
CC(=O)[C@@H]1CC[C@@]2(O)CC[C@]3(C)[C@H](CC[C@@H]4[C@@]5(C)CC[C@H](O)C(C)(C)[C@@H]5CC[C@]43C)[C@@H]12	2020	New modifications	Others	Juglans	Viridiplantae
C=C(C)[C@@H](O)[C@H]1C[C@@H]([C@@H]2CC[C@]34C[C@]23CC[C@@H]2[C@@]3(C)CC[C@H](OC(=O)C=C(C)C)C(C)(C)[C@@H]3C[C@H](O)[C@]24C)[C@@H](OC)O1	2020	New modifications	Triterpenoids	Toona	Viridiplantae
C#Cc1c(C)c(O)cc2c(C[C@H](O)C(=O)C(C)C)c(C)ccc12	2020	Site combinations	Diterpenoids	Flueggea	Viridiplantae
CC(C)=CCC/C(C)=C/CC/C(C)=C/CC[C@]1(C)CCc2c(O)c(O)cc(C)c2O1	2020	New modifications	Meroterpenoids	Allophylus	Viridiplantae
C=C(C)[C@@H]1CC[C@@]2(C)OOC(C3=C(C)C(=O)OC3)[C@@H]12	2020	New sites	Sesquiterpenoids	Commiphora	Viridiplantae
C/C1=C\CC[C@]2(C)O[C@H]2C[C@]2(C(C)C)CC[C@@](C)(O2)[C@@H](O)CC1	2020	New modifications	Diterpenoids	Boswellia	Viridiplantae
CO[C@@H]1C[C@@]2(CC[C@@]3(O2)[C@H](C)C(=O)C[C@H]2C(C)(C)[C@H](O)CC[C@@]23C)C(=O)O1	2020	New modifications	Diterpenoids	Rydingia	Viridiplantae
Cc1cc2c(cc1C)C[C@@](O)(C(C)(C)O)CC2	2020	New skeletons	Sesquiterpenoids	Alkekengi	Viridiplantae
CCCCCCCC/C=C/CCCCCCCC(=O)OC[C@@]1(O)C[C@@]23CC[C@@H]4C5=CC(=O)NC5=CC[C@@]4(C)[C@@H]2CC[C@@H]1C3	2020	New modifications	Diterpenoids	Coffea	Viridiplantae
C[C@H](CC[C@@H](O)C(C)(C)O)[C@@H]1CC[C@@]2(C)[C@@]1(C)CC[C@@]1(C)C3=C(C[C@H]4O[C@]412)C(C)(C)C(=O)CC3	2020	Site combinations	Triterpenoids	Jatropha	Viridiplantae
C[C@]1(CO)C[C@H]2C[C@@H](CO)[C@@H]3CC[C@]3(C)[C@@H]2C1	2020	New modifications	Sesquiterpenoids	Dictyostelium	Others
C=C1[C@@H](O)C[C@H](OC(C)=O)[C@@]2(C)[C@@H](O)[C@H](OC(C)=O)C3=C(C)[C@@H](OC(C)=O)C[C@@H]([C@@H](OC(C)=O)[C@H]12)C3(C)C	2020	New modifications	Diterpenoids	Taxus	Viridiplantae
COC(=O)c1ccc2c(c1)C[C@@H]1[C@](C)(CC[C@@H]3[C@]4(C)[C@@H](CC[C@@]13C)C(C)(C)CC[C@H]4O)O2	2020	New sites	Meroterpenoids	Cyanobacterium	Bacteria
CC1(C)CCC=C([C@@H]2CC=C(C(=O)O)CC2)C1	2020	New modifications	Sesquiterpenoids	Zea	Viridiplantae
CO[C@@H]1C[C@H]2[C@]3(CBr)CC[C@H]4C(C)(C)CCC[C@]4(C)[C@H]3C[C@@H](O)[C@]2(C)C2=C1C(=O)N(CC(=O)O)C2=O	2020	New sites	Sesterterpenoids	Hyrtios	Metazoa
C[C@H]1[C@@H]2O[C@@H]2C(=O)[C@]2(C)CC[C@@H]3[C@@H]4[C@@](C)(C(=O)O)CC[C@]4(C)C[C@@]132	2020	New sites	Diterpenoids	Penicillium	Fungi
CC(=O)O[C@H]1[C@@H]2C(C)(C)CCC[C@]23CO[C@@]1(O)[C@]12[C@H](OC(C)=O)[C@@]4(CO4)[C@H](CC[C@@H]31)[C@H]2O	2020	Site combinations	Diterpenoids	Isodon	Viridiplantae
CC(=O)OCC1(C)C(OC(C)=O)C2C3C(C31)C1C(O)CCCC12C	2020	New skeletons	Sesquiterpenoids	Botrytis	Fungi
C=C1C[C@@]23CC[C@H]4C(C)(C)C(O)CC[C@]4(C)[C@H]2CC[C@@H]1C3	2020	Site combinations	Diterpenoids	Vachellia	Viridiplantae
CC1(C)C(=O)CC[C@H]2C1=CC[C@H]1C[C@@](C)(C(O)CO)CC[C@@]12C	2020	New modifications	Diterpenoids	Triadica	Viridiplantae
C=C(CC/C=C(/C)C(=O)O)[C@@H]1CC[C@]2(C)[C@@H]1CC[C@@H]1[C@]34CC[C@@](O)(OC3)C(C)(C)[C@@H]4CC[C@]12C	2020	New modifications	Triterpenoids	Rhus	Viridiplantae
C=C(CC[C@H]1C(=O)OC2C[C@@]3(C)C4=CC[C@H]5C(C)(C)[C@@H](O)CC[C@]5(C)[C@@H]4CC[C@]3(C)C21)C(C)C	2020	New modifications	Triterpenoids	Polyalthia	Viridiplantae
CC1(C)[C@@H](O)[C@H](O)C[C@@]1(C)c1ccc(CO)cc1	2020	New modifications	Sesquiterpenoids	Trichoderma	Fungi
CC(=O)/C=C/C[C@@H](C)[C@H]1CC[C@@]2(C)C3=CC[C@H]4C(C)(C)[C@@H](O)CC[C@]4(C)C3=CC[C@]12C	2020	Site combinations	Triterpenoids	Ganoderma	Fungi
C=CC1=C(C)C[C@H]2[C@@H](CC[C@H]3C(C)(C)C(=O)CC[C@]23C)C1=O	2020	New modifications	Diterpenoids	Eragrostis	Viridiplantae
CC1=C[CH][C@@]2(C)CC[C@@](O)(C(C)C)[C@@H]2[C@H](OC(=O)c2ccc(O)cc2)C1	2020	New skeletons	Sesquiterpenoids	Ferula	Viridiplantae
C=C[C@@]1(C)C=C2CC[C@@H]3[C@H](C)[C@H](O)CC[C@@]3(C)[C@@H]2C[C@@H]1O	2020	Site combinations	Diterpenoids	Euphorbia	Viridiplantae
C=C(C)[C@H]1CC[C@@]23CC[C@@H](C[C@H]2[C@]1(C)CCC(=O)O)[C@H](C(=O)O)C3	2020	New modifications	Diterpenoids	Excoecaria	Viridiplantae
COC(=O)C(OC(C)=O)[C@H]1C(C)(C)[C@H](O)[C@]2(O)CC3=C4CC(=O)O[C@@H](c5ccoc5)[C@]4(C)CC[C@@H]3[C@@]1(C)C2=O	2020	New modifications	Triterpenoids	Xylocarpus	Viridiplantae
CC(=O)O[C@@H]1C[C@H](O)/C(C)=C/CC[C@]2(C)O[C@@H]2C[C@]2(C(C)C)CC[C@@]1(C)O2	2020	New modifications	Diterpenoids	Boswellia	Viridiplantae
C[C@@H]1[C@@H]2C[C@@]3(CC[C@]4(C)C(=CC[C@H]5[C@@]6(C)C[C@@H](O)[C@H](O)[C@@](C)(CO)[C@@H]6CC[C@]54C)[C@@H]3[C@]1(C)O)C(=O)O2	2020	New sites	Triterpenoids	Anchusa	Viridiplantae
CC1=CC(=O)C2[C@H]3C1[C@]2(C)[C@@H](O)[C@@H](O)[C@H]3C(C)C	2020	New modifications	Sesquiterpenoids	Lavandula	Viridiplantae
C[C@]1(O)[CH]CC[C@@]2(C)[C@H]1[C@@H](O)C=C1[C@@H]3OCC[C@@]3(C)CC[C@@H]12	2020	Site combinations	Diterpenoids	Xylaria	Fungi
C[C@@H]1O[C@@H](O[C@H]2[C@H](OC(=O)[C@]34CCC(C)(C)C[C@H]3C3=CC[C@@H]5[C@@]6(C)C[C@H](O)[C@H](O[C@@H]7O[C@H](CO)[C@@H](O)[C@H](O)[C@H]7O)[C@](C)(CO)[C@@H]6CC[C@@]5(C)[C@]3(C)C[C@H]4O)OC[C@H](O)[C@@H]2O)[C@H](O)[C@H](O)[C@H]1O[C@@H]1OC[C@@H](O)[C@H](O[C@@H]2OC[C@](O)(CO)[C@H]2O)[C@H]1O	2020	New modifications	Triterpenoids	Platycodon	Viridiplantae
CC(=O)O[C@@H]1CC[C@](C)(O)/C=C/C/C(C)=C\C[C@]2(C(C)C)CC[C@@]1(C)O2	2020	New modifications	Diterpenoids	Boswellia	Viridiplantae
C=C1C(=O)O[C@H]2[C@H]1CC[C@@](C)(O)[C@H]1C(=O)C=C(C)[C@]21O	2020	New modifications	Sesquiterpenoids	Artemisia	Viridiplantae
C=C(CC[C@H](C)[C@H]1CC[C@H]2C3=C(C(=O)[C@@H](O)[C@@]21C)[C@@]1(C)CC[C@H](O)[C@H](C)[C@@H]1CC3=O)[C@@H](C)C(=O)O	2020	New modifications	Steroids	Taiwanofungus	Fungi
CC1(C)CC[C@]2(C(=O)O[C@@H]3O[C@H](CO)[C@@H](O)[C@H](O)[C@H]3O)CCC3=C(CCC4[C@@]3(C)CCC3C(C)(C)[C@@H](O)[C@H](O)C[C@@]34C)[C@@H]2C1	2020	New modifications	Triterpenoids	Ilex	Viridiplantae
COC(=O)c1cc2c3c(coc3c1)CC[C@@H]2C(C)(C)O	2020	New sites	Sesquiterpenoids	Trichoderma	Fungi
CO[C@H]1C[C@H](C)[C@H]2C(=O)c3c(C)coc3C=C(C)[C@@H]12	2020	New modifications	Sesquiterpenoids	Valeriana	Viridiplantae
CC1(C)CCC[C@]2(C)C3=C(CC[C@@H]12)C(O)OC3=O	2020	New modifications	Sesquiterpenoids	Undefined	Others
C=C1[C@@H](OC(C)=O)CC[C@]2(C)C[C@H]3OC(=O)C(C)=C3C[C@@H]12	2020	New modifications	Sesquiterpenoids	Atractylodes	Viridiplantae
C/C=C(\C)C(=O)OC1C(C)(C)[C@H]([C@H](O)C(=O)OC)[C@]2(C)C(=O)[C@@]1(O)C=C1C3=CC(=O)O[C@@H](c4ccoc4)[C@]3(C)CC[C@@H]12	2020	New modifications	Triterpenoids	Heynea	Viridiplantae
C=C(C)[C@H]1CC[C@H](CO)[C@H]2CCC(C(=O)O)=C[C@H]12	2020	Site combinations	Sesquiterpenoids	Myristica	Viridiplantae
CCO[C@@H]1C[C@]2(O)[C@@H]3C[C@H](O[C@@H]2O1)C1([C@]2(C)[C@@H](O)[C@@H]4OC[C@@]5(C)C4[C@@]4(CO[C@](O)(C(=O)OC)[C@@H]24)[C@@H](OC(=O)/C=C/c2ccccc2)C[C@H]5OC(=O)/C=C/c2ccccc2)O[C@@]31C	2020	New modifications	Triterpenoids	Melia	Viridiplantae
CC[C@@]1(CO)CC[C@]2(C)C[C@@]34[C@@H](C)C=CC(=O)[C@]3(C)CC[C@H]4[C@@H]21	2020	New skeletons	Diterpenoids	Penicillium	Fungi
OC[C@H]1O[C@H](OC[C@H]2O[C@@H](O[C@@H]3OC=C[C@H]4[C@H](O)[C@@H]5O[C@]5(CO)[C@@H]34)[C@H](O)[C@@H](O)[C@@H]2O)[C@H](O)[C@@H](O)[C@H]1O	2020	New modifications	Monoterpenoids	Rehmannia	Viridiplantae
C[C@H](CCC(O)C(C)(C)O)C1CC[C@@]2(C)C3=C(C(=O)C[C@]12C)[C@@]1(C)CC[C@H](O)C(C)(C)C1CC3	2020	Site combinations	Triterpenoids	Euphorbia	Viridiplantae
CC(=O)O[C@H]1C/C(C(C)C)=C\[C@H]2O[C@]2(C)CC/C=C(\C)CC[C@@H]2O[C@]12C	2020	New modifications	Diterpenoids	Sarcophyton	Metazoa
CC1=C2C(=O)C3=C(C[C@H]2OC1=O)[C@@]1(C)C(CC3)C(C)(C)CC[C@@H]1O	2020	New sites	Diterpenoids	Euphorbia	Viridiplantae
C=C(C(=O)OCC)[C@@H]1[C@@H](OC(=O)/C(C)=C\C)C[C@]2(C)[C@H](C(C)=CC[C@H]2O)[C@H]1O	2020	New modifications	Sesquiterpenoids	Artemisia	Viridiplantae
CC1(C)CC2C3=CCC4[C@@]5(C)CC[C@H](O[C@H]6O[C@H](CO)[C@@H](O[C@@H]7OC[C@@H](O)[C@H](O)[C@H]7O)[C@H](O)[C@H]6O[C@@H]6OC[C@@H](O[C@H]7OC[C@@H](O)[C@H](O)[C@H]7O)[C@H](O[C@@H]7O[C@H](CO)[C@@H](O)[C@H](O)[C@H]7O[C@@H]7O[C@H](CO)[C@@H](O)[C@H](O)[C@H]7O)[C@H]6O)C(C)(C)C5CC[C@@]4(C)[C@]3(C)CC[C@@]2(C(=O)O)C[C@@H]1O	2020	Site combinations	Triterpenoids	Erythrophleum	Viridiplantae
C=C(C)[C@@H]1CC[C@]2(C(=O)O)CC[C@]3(C)C(CCC4[C@@]5(C)CC[C@H](OC(=O)c6ccccc6)C(C)(C)C5CC[C@]43C)C12	2020	New modifications	Triterpenoids	Helicteres	Viridiplantae
COC(=O)[C@@H](C)CCC/C(C)=C/[C@H]1C[C@@]2(C)OC3=C(C[C@H]2O1)C(=O)CC[C@H]3O	2020	Site combinations	Meroterpenoids	Stemphylium	Fungi
C/C=C(/C)C(=O)O[C@]1(C)CCC2=C(C(C)C)C(=O)C[C@@]2(C)CC1=O	2020	New modifications	Sesquiterpenoids	Ferula	Viridiplantae
CC(C)C1=CC2CC3(C=O)[C@@H]4C[C@H](O)[C@@H](C)[C@H]4CC2(CO)[C@]13C(=O)O	2020	New modifications	Diterpenoids	Lentzea	Bacteria
CCO[C@@]1(C)CCC(C(C)(C)O)=C[C@@H]2[C@@H]1CC[C@]2(C)O	2020	New modifications	Sesquiterpenoids	Curcuma	Viridiplantae
CC1=C[CH][C@@]2(C)CC[C@@](O)(C(C)C)[C@@H]2[CH]C1	2020	New modifications	Sesquiterpenoids	Ferula	Viridiplantae
C=C1[C@H]2CC[C@@]3(CC[C@H](C(=C)C)[C@@](C)(CCC(=O)O)[C@@H]3C2)[C@H]1O	2020	Site combinations	Diterpenoids	Excoecaria	Viridiplantae
C=C[C@H]1[C@@H]2CC[C@@]3(O)[C@@](C)(C(=O)O)[C@H](O)CC[C@]3(C)[C@H]2CC[C@@]1(O)CCl	2020	Site combinations	Diterpenoids	Talaromyces	Fungi
C=C(C)C(=O)CC[C@](C)(O[C@@H]1O[C@H](CO[C@@H]2OC[C@@H](O)[C@H](O)[C@H]2O)[C@@H](O)[C@H](O)[C@H]1O)C1CC[C@]2(C)C1[C@H](O)CC1[C@@]3(C)C[C@@H](O)C(O[C@@H]4O[C@H](CO)[C@@H](O)[C@H](O)[C@H]4O[C@@H]4O[C@H](CO)[C@@H](O)[C@H](O)[C@H]4O)C(C)(C)C3CC[C@]12C	2020	New modifications	Triterpenoids	Gynostemma	Viridiplantae
C=C(CO)C(=O)O[C@H]1C/C(COC(C)=O)=C\CC/C(C)=C/[C@H]2OC(=O)C(=C)[C@H]12	2020	New modifications	Sesquiterpenoids	Dimerostemma	Viridiplantae
CC(C)=CCC[C@H](C)[C@@]12C=C[C@@](C)(CC1)OO2	2020	New modifications	Sesquiterpenoids	Mikania	Viridiplantae
CC1(C)C[C@H]2C3=CC[C@@H]4[C@@]5(C)C[C@@H](O)[C@H](O)[C@@](C)(CO[C@@H]6O[C@H](CO)[C@@H](O)C(O)[C@H]6O[C@@H]6O[C@H](CO)[C@@H](O)C(O)[C@H]6O)[C@@H]5CC[C@@]4(C)[C@]3(C)CC[C@@]2(C(=O)O)CC1O[C@@H]1O[C@H](CO)[C@@H](O)C(O)[C@H]1O	2020	New sites	Triterpenoids	Anchusa	Viridiplantae
C=C1CCC(=O)[C@]2(C)CC3OC(=O)C(C)=C3C[C@@H]12	2020	New modifications	Sesquiterpenoids	Neolitsea	Viridiplantae
C=C(C)[C@@]12OC3(/C=C/C=C/CCCCC)O[C@H]1[C@@H]1[C@H]4OC4(CO)[C@H](O)[C@]4(O)C(=O)C(C)=C[C@H]4[C@@]1(O3)[C@@H](C)[C@@H]2OC(=O)CCCC	2020	New modifications	Diterpenoids	Daphne	Viridiplantae
CC1=C[C@H]2OC(=O)C(C)=C2C[C@@H]1O	2020	New modifications	Monoterpenoids	Myristica	Viridiplantae
C/C=C1/[C@H](O[C@@H]2O[C@H](CO)[C@@H](O)[C@H](O)[C@H]2O)OC=C(C(=O)OC)[C@H]1CC(=O)OCCc1ccc(OC)cc1	2020	New modifications	Monoterpenoids	Fraxinus	Viridiplantae
CC1=C[C@@]2(C[C@@H](C)[C@H]3[C@H](C[C@@]4(C)[C@@H]5CC[C@H]6C(C)(C)C(=O)CC[C@@]67C[C@@]57CC[C@]34C)O2)OC1=O	2020	New modifications	Triterpenoids	Pseudolarix	Viridiplantae
CO[C@]1(C)C[C@H](C)[C@H]2OC(=O)c3c(O)c(C)cc(C)c3[C@H]2O1	2020	New skeletons	Meroterpenoids	Ganoderma	Fungi
C=C(C)[C@@H]1CC[C@@](C)(O)[C@@H]2[C@@H](O)[C@H](O)[C@@](C)(O)[C@@H]2C1	2020	Site combinations	Sesquiterpenoids	Solanum	Viridiplantae
CO[C@@H]1C=C2[C@@H](C)[C@@H]3[C@H](O)[C@H](OC(=O)c4ccccc4)[C@@]4(O)C(C)(C)CCC[C@]4(C)[C@H]3C[C@@]2(OC)O1	2020	New modifications	Diterpenoids	Caesalpinia	Viridiplantae
C=C(C)[C@@]12OC3(/C=C/C=C\CCCCC)O[C@H]1[C@@H]1[C@H]4OC4(CO)[C@H](O)[C@]4(O)C(=O)C(C)=C[C@H]4[C@@]1(O3)[C@@H](C)[C@@H]2OC(=O)c1ccccc1	2020	New modifications	Diterpenoids	Daphne	Viridiplantae
C=C1CCC[C@@]2(C)[C@H]1CC1=C(C)C(=O)OC13[C@H]2[C@]1(C)C32OC(=O)C(C)=C2C[C@H]2C(=C)CCC[C@@]21C	2020	New skeletons	Sesquiterpenoids	Atractylodes	Viridiplantae
C/C(=C/C(=O)O)CC/C=C(\C)CC/C=C(\C)C(=O)/C=C/C(C)(C)O	2020	New modifications	Diterpenoids	Aphanamixis	Viridiplantae
CC1=C2C(=O)OC[C@@H](C(=O)O[C@@H]3[C@@H]4O[C@]4(C)[C@H]4[C@H](O[C@@H]5O[C@H](CO)[C@@H](O)C(O)[C@H]5O)OC=C[C@@H]34)[C@H]2CC1	2020	New modifications	Monoterpenoids	Linaria	Metazoa
CC1=C[C@H]2[C@@H](CC1)[C@@H](C)CC[C@@]2(O)C(C)C	2020	New modifications	Sesquiterpenoids	Mikania	Viridiplantae
CC(=O)[C@@]1(CC(=O)C[C@H](C)C(=O)O)CC(=O)[C@@]2(C)[C@]34O[C@H]3C[C@H]3C(C)(C)C(=O)CC[C@]3(C)C4=CC(=O)[C@]12C	2020	New skeletons	Triterpenoids	Ganoderma	Fungi
C[C@@]1(O)[C@H](O)CC[C@]2(C)[C@H]3CC[C@]4(C)CCO[C@H]4C3=C[CH][C@@H]12	2020	Site combinations	Diterpenoids	Xylaria	Fungi
C=C(C(=O)OC)[C@@H]1C[C@H](O)[C@@H]2[C@]3(C1)C(=O)OC[C@]21[C@@H](OC(C)=O)CC[C@@](C)(CO)[C@H]1[C@@H]3O	2020	New sites	Diterpenoids	Isodon	Viridiplantae
CC(=O)O/C1=C(\C)[C@@H](OC(C)=O)C[C@H](O)/C(CO)=C\[C@H](O)[C@@H]2C[C@H](O)C(C)=C([C@H]1OC(C)=O)C2(C)C	2020	New modifications	Diterpenoids	Taxus	Viridiplantae
C[C@@]1(O)[C@H](CO)CC[C@]2(C(=O)O)CC[C@]3(C)C(=CCC4[C@@]5(C)C[C@@H](O)[C@H](O)[C@@](C)(CO)C5CC[C@]43C)[C@@H]21	2020	New sites	Triterpenoids	Ilex	Viridiplantae
Cc1ccc2c3c1CC[C@@H]1C(C)(C)OC(=O)[C@@]31OC(C(C)C)=C2	2020	New skeletons	Diterpenoids	Salvia	Viridiplantae
C/C=C(\CO)CC[C@H](C)[C@H]1CC[C@H]2C3=C(C(=O)C[C@@]21C)[C@@]1(C)CC[C@H](O)[C@](C)(O)[C@@H]1C[C@H]3O	2020	New modifications	Triterpenoids	Taiwanofungus	Fungi
CC1(C)CC[C@]2(C(=O)O)CC[C@]3(C)C(=CCC4[C@@]5(C)C[C@@H](O)[C@H](O[C@H]6O[C@H](COC(=O)c7cc(O)c(O)c(O)c7)[C@@H](O)[C@H](O)[C@H]6O)[C@](C)(C(=O)O)C5CC[C@]43C)[C@@H]2[C@@H]1O	2020	New sites	Triterpenoids	Quercus	Viridiplantae
CC(=O)OC[C@@]1(O)CC[C@H]2C3=C(CC[C@@H]4[C@]3(C)CC[C@@H](O)[C@@]4(C)CO)C[C@H]21	2020	New skeletons	diterpenoids	Botrytis	Fungi
CC(C)=CCC/C(C)=C/C[C@@]12C[C@@]3(CC/C=C(\C)CCCC(C)(C)[C@@H]4O[C@H]43)OC1=C(C(=O)c1ccccc1)C(=O)C(CC=C(C)C)(CC=C(C)C)C2=O	2020	New skeletons	Meroterpenoids	Hypericum	Viridiplantae
C=C(C)[C@H](O)CC[C@](C)(O[C@@H]1O[C@](C)(CO)[C@@H](O)[C@H](O)[C@H]1O)C1CC[C@]2(C)C1[C@H](O)CC1[C@@]3(C)C[C@@H](O)C(OC(OC(CO)CO)C(CO)O[C@@H]4O[C@H](CO)[C@@H](O)[C@H](O)[C@H]4O)C(C)(C)C3CC[C@]12C	2020	New modifications	Triterpenoids	Gynostemma	Viridiplantae
C=C(C)[C@@]12OC3(/C=C/C=C/CCCCC)O[C@H]1[C@@H]1[C@H]4OC4(CO)[C@H](O)[C@]4(O)C(=O)C(C)=C[C@H]4[C@@]1(O3)[C@@H](C)[C@@H]2OC(=O)CC	2020	New modifications	Diterpenoids	Daphne	Viridiplantae
CC(C)CCC[C@@H](C)[C@H]1CCC2C3CCC4=CC(=O)CC[C@]4(C)C3CC[C@@]21C	2020	New modifications	Steroids	Boophone	Viridiplantae
CC1=C(Cc2c(C)cccc2C)C(C)(O)OC1=O	2020	Site combinations	Sesquiterpenoids	Commiphora	Viridiplantae
C[C@@H]1[C@@H](O)C[C@@H](O)[C@]2(C)CC[C@@H]([C@@](C)(O)CO)C[C@@H]12	2020	New modifications	Sesquiterpenoids	Datura	Viridiplantae
O=C(/C=C/c1ccccc1)OC[C@H]1O[C@@H](O[C@@H]2OC=C[C@H]3[C@H](O[C@@H]4OC(CO)[C@H](O)[C@H](O)[C@H]4O)[C@@H]4O[C@]4(CO)[C@@H]23)[C@H](O)[C@@H](O)[C@@H]1O	2020	New modifications	Monoterpenoids	Picrorhiza	Viridiplantae
C=C(CO)[C@H]1C(=O)CCC2=CCC[C@H](C)[C@]21C	2020	New modifications	Sesquiterpenoids	Litophyton	Metazoa
COc1cc(C(=O)OC[C@H]2O[C@@H](O[C@H]3C[C@]4(C)CO[C@](C)(C3)[C@]4(O)/C=C/C(C)=C\C(=O)O)[C@H](O)[C@@H](O)[C@@H]2O)ccc1O	2020	New modifications	Sesquiterpenoids	Zanthoxylum	Viridiplantae
CC(C)=CCCc1c(C)ccc2cc(C(C)C)c(=O)oc(=O)c12	2020	New skeletons	Diterpenoids	Salvia	Viridiplantae
C/C=C1/CN2[C@H]3Cc4c([nH]c5cccc(COC)c45)[C@]2(O)C[C@H]1C3CO	2020	New skeletons	Meroterpenoids	Rauvolfia	Viridiplantae
C=C1[C@@H]2CC[C@@H]3C[C@@]2(C[C@@]2(O)C(=O)C(C)(C)[C@@H](O)C[C@H]12)C[C@@]3(C)O	2020	New modifications	Diterpenoids	Pieris	Viridiplantae
COCC1=C2C(=O)[C@@]3(C)C(=O)C=C(C(C)C)[C@]34C[C@H](O)[C@H](C)[C@@]2(CC1)O4	2020	New sites	Diterpenoids	Alternaria	Fungi
CCC(C)C(=O)O[C@H]1[C@H]2[C@@H]([C@H](OC(C)=O)[C@@H](C)C(=O)[C@@]34C[C@H](C)[C@H](OC(C)=O)[C@]3(/C=C(\C)[C@H]1OC(=O)c1cccnc1)O4)C2(C)C	2020	New modifications	Diterpenoids	Euphorbia	Viridiplantae
C[C@H](CC[C@@H](O)C(C)(C)O)[C@@H]1CC[C@@]2(C)[C@@]1(C)CC[C@@]1(C)C3=C(C[C@H]4O[C@]412)C(C)(C)[C@H](O)CC3	2020	Site combinations	Triterpenoids	Jatropha	Viridiplantae
CC(C)c1c(O)ccc2c1CC[C@@H]1[C@]2(C)[C@@H](O)CC[C@@]1(C)CO	2020	Site combinations	Diterpenoids	Dacrycarpus	Viridiplantae
CC1=C2CC[C@]3(C)O[C@H]3C[C@@H](O)/C(C)=C/CC/C(C)=C/[C@@H]2OC1=O	2020	Site combinations	Diterpenoids	Sarcophyton	Metazoa
C=C1CC[C@H]2[C@@](C)(CO)CCC[C@]2(C)[C@H]1C[C@@H](O)/C(C)=C/C(=O)O	2020	New modifications	Diterpenoids	Forsythia	Viridiplantae
CC1=C(CCC2=C[C@@H](O)OC2=O)[C@]2(C)CCC(=O)C(C)(C)C2=C(O)C1=O	2020	Site combinations	Diterpenoids	Leonurus	Viridiplantae
CC(=O)/C(C)=C1/[C@H]2OC(=O)[C@]1(C)C[C@H](O)[C@H]2[C@H](C)C(=O)O	2020	New sites	Sesquiterpenoids	Artemisia	Viridiplantae
C[C@H]1/C(=C\C(=O)O)[C@H](O)C[C@H]2[C@H]1CC[C@H]1[C@](C)(C(=O)O)CCC[C@]21C	2020	New modifications	Diterpenoids	Erythrophleum	Viridiplantae
CC(C)=CCC[C@]1(C)[C@H]2CC[C@@](C)(O)[C@H]3CC[C@H](C)[C@@H]3[C@H]21	2020	New modifications	Diterpenoids	Populus	Viridiplantae
C=C(C)[C@@H]1CC[C@]2(C)[C@H](C[C@@H](O[C@@H]3O[C@H](C)[C@@H](O)[C@H](O)[C@H]3O)[C@@H]3[C@@H]([C@@](C)(O)C/C=C/C(C)(C)O)CC[C@]32C)[C@@]1(C)CCC(=O)OC	2020	New modifications	Triterpenoids	Cyclocarya	Viridiplantae
CCCCCCCCCCCCCCCCCC(=O)OC[C@@]1(O)C[C@@]23CC[C@@H]4C5=CC(=O)NC5=CC[C@@]4(C)[C@@H]2CC[C@@H]1C3	2020	New modifications	Diterpenoids	Coffea	Viridiplantae
CC(C)=CC(=O)CC(C)[C@H]1C=C[C@@](O)(CO)CC1	2020	New modifications	Sesquiterpenoids	Curcuma	Viridiplantae
CC1=C2CC/C(C)=C/CC/C(C)=C/CCC(C)(O)/C=C/2OC1=O	2020	New modifications	Diterpenoids	Sarcophyton	Viridiplantae
COC(=O)CC[C@@]1(C)CC[C@H](C(C)(C)O)C[C@@H]1[C@H](C)O	2020	New sites	Sesquiterpenoids	Solanum	Viridiplantae
C=C1CCC[C@H]2[C@@]1(C)CC[C@H]1[C@H](O)O[C@@H](/C(C)=C/C(=O)O)C[C@@]12C	2020	New modifications	Diterpenoids	Spongia	Metazoa
COC1C=C(CCC2=C(C)C(=O)C[C@H]3C(C)(C)[C@H](O)CC[C@]23C)C(=O)O1	2020	New modifications	Diterpenoids	Rydingia	Viridiplantae
COC(=O)[C@]1(C)CCC[C@]2(CO[C@@H]3N=C[C@]45CCC[C@@]3(C(=O)OC)[C@@H]4CC[C@@H]3[C@@H]5Cc4occc4[C@@H]3C)[C@H]3CC/C(=C\CO)[C@H](C)[C@@H]3CC[C@H]21	2020	Site combinations	Diterpenoids	Caesalpinia	Viridiplantae
C=C1CC[C@H]2[C@@](C)(C(=O)O)[CH]CC[C@]2(C)[C@@H]1CC/C(C)=C/C(=O)O	2020	New modifications	Diterpenoids	Undefined	Others
C=C1C2[C@H](O)C[C@]3(C)C(CC=C4[C@@H](O)[C@@]5(CC[C@@H](C)[C@@H]5C)CC[C@]43C)[C@@]2(C)C[C@@H](O)[C@@H]1O	2020	New skeletons	Triterpenoids	Syzygium	Viridiplantae
CC1(C)C[C@H]2C3=CC[C@@H]4[C@@]5(C)C[C@@H](O)[C@H](OC(=O)CO)[C@@](C)(CO)[C@@H]5CC[C@@]4(C)[C@]3(C)CC[C@@]2(C(=O)O)CC1O[C@@H]1O[C@H](CO)[C@@H](O)C(O)[C@H]1O	2020	New sites	Triterpenoids	Anchusa	Viridiplantae
CO[C@H]1C[C@H]2[C@@]3(CC[C@]2(C)C[C@H]2[C@H]4C1=CO[C@H]4C[C@@]2(C)O)O[C@@H](C=C(C)C)C[C@@H]3C	2020	Site combinations	Sesterterpenoids	Bipolaris	Fungi
C[C@@H]1C2=C3CC[C@@H]4[C@@]5(C)C[C@H](O)[C@@H](O)[C@@](C)(CO)[C@@H]5CC[C@@]4(C)[C@]3(C)CC[C@@]2(C(=O)O)CC[C@]1(C)O	2020	New sites	Triterpenoids	Rosa	Viridiplantae
C[C@@H]1C2=C3CC[C@@H]4[C@@]5(C)C[C@@H](O)[C@@H](O)[C@@](C)(CO)[C@@H]5CC[C@@]4(C)[C@]3(C)CC[C@@]2(C(=O)O)CC[C@]1(C)O	2020	New sites	Triterpenoids	Rosa	Viridiplantae
CC(C)=C[C@H]1C[C@H](C)[C@]2(CC[C@]3(C)C[C@@H]4C(C)=CC(=O)/C4=C(\CO)C(=O)C[C@@H]23)O1	2020	New sites	others	Bipolaris	Fungi
CC1O[C@@H](O[C@H]2C(O)[C@H](O)CO[C@H]2O[C@H]2CC[C@@]3(C)C(CC[C@]4(C)C3CC=C3[C@@H]5CC(C)(C)CC[C@]5(C(=O)O[C@@H]5OC(CO[C@@H]6OC(CO)[C@@H](O)C(O)[C@@H]6O)[C@@H](O)C(O)[C@@H]5O)CC[C@]34C)C2(C)C)C(O)[C@@H](O[C@@H]2OC[C@@H](OC3OC(CO)[C@@H](OC4OCC(O)[C@@H](O[C@@H]5OC(C)C(O)[C@H](O)[C@@H]5O)[C@@H]4O)C(O)[C@@H]3O)C(O)[C@@H]2O)C1O	2020	New modifications	Triterpenoids	Scabiosa	Viridiplantae
CC(=O)OC[C@]12CCCC(C)(C)[C@@H]1CC[C@@]1(C)[C@@H]3C[C@H](O)[C@H]4[C@H](C)OC(=O)[C@@H]4[C@@]3(C)C(=O)C[C@@H]12	2020	New modifications	Sesterterpenoids	Lendenfeldia	Metazoa
C=C[C@@]1(C)CCC2=C(C1)C(=O)C[C@H]1C(C)(C)C[C@H](O)C[C@]21C	2020	New modifications	Diterpenoids	Caesalpinia	Viridiplantae
C[C@]12CC[CH][C@@H](CO)[C@@H]1[CH]C=C1[C@@H]2CC[C@]2(C)CCO[C@@H]12	2020	Site combinations	Diterpenoids	Xylaria	Fungi
CC(=O)O[C@H]1C[C@@H](OC(C)=O)C(C)(C)[C@@H]2C[C@@H](O)[C@]3(C)C(CC[C@@]4(C)[C@H](c5ccoc5)CC(=O)[C@H]43)[C@@]12C	2020	New modifications	Triterpenoids	Toona	Viridiplantae
COc1ccc2c3c([nH]c2c1)[C@H]1C[C@H]2C(=C[C@H](O)[C@H](O)[C@@H]2C(=O)O)C[N@@+]1([O-])CC3	2020	New sites	Meroterpenoids	Rauvolfia	Viridiplantae
C=C1[C@@H](O)[C@H]2[C@@H](C[C@@H](OC(=O)CCc3ccccc3)/C(CO)=C/[C@@H](OC(C)=O)[C@H]1O)[C@]2(C)CO	2020	New modifications	Sesquiterpenoids	Plagiochila	Viridiplantae
C=C(CC[C@H](C)[C@H]1CC[C@H]2C3=CC[C@H]4[C@@H](C)C(=O)CC[C@]4(C)C3=C[C@H](O)[C@@]21C)C(C)C	2020	New modifications	Steroids	Taiwanofungus	Fungi
C[C@@H]1C2=C3CC[C@@H]4[C@@]5(C)C[C@@H](O)[C@@H](O)[C@](C)(CO)[C@@H]5CC[C@@]4(C)[C@]3(C)CC[C@@]2(C(=O)O)CC[C@]1(C)O	2020	New sites	Triterpenoids	Rosa	Viridiplantae
C[C@H]1[C@@H](CO)[C@@H]2C[C@H]3c4[nH]c5ccccc5c4C[C@@H]([C@H]2CO)N31	2020	New sites	Others	Rauvolfia	Viridiplantae
CC1=C/C(=C/C2(C)CCC/C(=C\CO)COO2)OC1=O	2020	Site combinations	Sesquiterpenoids	Sinularia	Metazoa
COC(=O)C1=CO[C@@H](O[C@@H]2O[C@H](CO)[C@@H](O)[C@H](O)[C@H]2O)[C@@H]2[C@H](C)O[C@H](OC[C@H]3O[C@](O)(CO)[C@@H](O)[C@@H]3O)C[C@H]12	2020	New modifications	Monoterpenoids	Cornus	Viridiplantae
CCCCC/C=C/CCC(=O)OCCC[C@H](C)C(CC/C(C)=C/COc1ccc2ccc(=O)oc2c1)=C(C)C	2020	New skeletons	Sesquiterpenoids	Ferula	Viridiplantae
COc1cc(C)c(O[C@H]2OC(CO[C@H]3OCC(O)(CO)[C@H]3O)[C@@H](O)C(O)[C@H]2O)cc1C(C)C	2020	New modifications	Monoterpenoids	Schisandra	Viridiplantae
COC[C@@]1(O)CC[C@H]2[C@@H](C)[C@@H](O)CC3=C(C(C)C)CC[C@]3(C)[C@H]3O[C@@]231	2020	New sites	Diterpenoids	Alternaria	Fungi
CC1(C)CC[C@]23CC[C@]4(C)[C@H](CC[C@@H]5[C@@]6(C)CC[C@H](O)C(C)(C)[C@@H]6CC[C@]54C)[C@H]2[C@H]1OC3	2020	New modifications	Triterpenoids	Betula	Viridiplantae
CCCCCCCC(=O)O[C@H]1C/C=C(\C)C[C@H]2O[C@@H]3[C@H]4[C@@H]2[C@](C)(O)C(=O)C[C@@H]4[C@H](C)CO[C@]13C	2020	New sites	Diterpenoids	Briareum	Metazoa
C=C[C@@](O)(CO)CC[C@@H]1C(=C)CC[C@@H]2C(C)(C)[C@H](O)CC[C@]21C	2020	New modifications	Diterpenoids	Pieris	Viridiplantae
C/C=C\C(=O)O[C@@H]1C[C@H]2O[C@@H]3C=C(C)C(=O)C[C@]3(C)[C@]1(C)[C@@]2(O)CO	2020	New modifications	Sesquiterpenoids	Alternaria	Fungi
COC(OC)/C(=C\C(=O)O)CC[C@@]1(C)[C@H](C)CC[C@@]2(C)C(C)=CCC[C@H]12	2020	New modifications	Diterpenoids	Polyalthia	Viridiplantae
CC(C)=CCC/C(C)=C\CC/C(C)=C/C=C\C(C)=C\C=C\C=C(C)/C=C/C=C(C)/C=C/C=C(/C)CCCC(C)(C)O	2020	New modifications	Others	Rubrivivax	Bacteria
CC1=C(CCC2=CC(=O)O[C@H]2O)[C@]2(C)CCC(=O)C(C)(C)[C@H]2[C@@H](O)C1=O	2020	Site combinations	Diterpenoids	Leonurus	Viridiplantae
C=C[C@@]1(C)C=C2CC[C@H]3[C@@](C)(CC[C@@H](O)[C@@]3(C)O)[C@@H]2C[C@@H]1O	2020	New modifications	Diterpenoids	Euphorbia	Viridiplantae
C=C(C)[C@H]1CC[C@]2(C)C(C[C@@H](O)[C@]34C[C@@H](CCC[C@@H](C)[C@]32C)C(=O)O4)[C@@]1(C)CCC(=O)OC	2020	New skeletons	Diterpenoids	Streblus	Viridiplantae
CC1=CCC[C@H](C)[C@]12CC[C@@H](C(O)(CO)CO)C2	2020	Site combinations	Sesquiterpenoids	Aquilaria	Viridiplantae
C=C1CCC(=C(C)C)[C@H]2C=C(C(=O)OC)CC/C=C(\C(=O)O)[C@H](O)C[C@H]12	2020	New sites	Diterpenoids	Streptomyces	Bacteria
CC(C)C1=C[C@H](O)[C@H]([C@@]2(C)CC[C@@]3(C)C4=CC[C@H]5C(C)(C)[C@@H](O)CC[C@]5(C)[C@@H]4CC[C@@]32C)CC1	2020	New skeletons	Triterpenoids	Polyalthia	Viridiplantae
C=C(C)[C@@H](O)COc1ccc(CC(=O)O)cc1	2020	New modifications	Others	Penicillium	Fungi
C/C1=C\[C@H](O)[C@H](OC(=O)CO)C(C)(C)C(=O)[C@H](O)C[C@]23C[C@@](C)(O)[C@H](CC[C@@H]12)[C@H]3O	2020	New modifications	Diterpenoids	Pieris	Viridiplantae
C=C1CC[C@@]23CC[C@]4(C)[C@](OC2=O)([C@H]2O[C@H]2[C@@H]2[C@@]5(C)C[C@@H](O)[C@H](O)C(=C)[C@@H]5CC[C@]24C)[C@@H]3[C@H]1C	2020	New modifications	Triterpenoids	Bousigonia	Viridiplantae
C=C1/C=C/[C@H](OC(C)=O)[C@@]2(C)[C@@H](OC(C)=O)CCC(=C)[C@@H]2[C@H](OC(C)=O)[C@]2(O)[C@H](C)C(=O)O[C@H]2[C@H]1Cl	2020	New modifications	Diterpenoids	Junceella	Metazoa
CCO[C@@]1(C)CCC(C(C)(C)O)=C[C@@H]2[C@@H]1CC[C@@]2(C)O	2020	New modifications	Sesquiterpenoids	Curcuma	Viridiplantae
COc1cc(C(=O)O[C@H]2[C@@H]3C=CO[C@@H](O[C@@H]4O[C@H](CO)[C@@H](O)[C@H](O)[C@H]4O)[C@@H]3[C@](O)(CO)[C@@H]2OC(=O)c2ccc(O[C@@H]3O[C@H](CO)[C@@H](O)[C@H](O)[C@H]3O)c(OC)c2)ccc1O	2020	New modifications	Monoterpenoids	Picrorhiza	Viridiplantae
CC(=O)O[C@H]1[C@@H](C(C)C)[C@H]2C3C(=O)C=C(C)C2[C@]3(C)[C@H]1O	2020	New modifications	Sesquiterpenoids	Lavandula	Viridiplantae
CCC(C)C(=O)C1=C(O)C2=C(OC(C)(C)[C@@H]3CCC(C)=C[C@H]23)[C@@](C)(CC=C(C)C)C1=O	2020	New skeletons	Meroterpenoids	Hypericum	Viridiplantae
CC(C)C1=CC[C@@]2(C)OC3=C(C[C@@H]12)C(=O)CC[C@H]3O	2020	New sites	Meroterpenoids	Bipolaris	Fungi
C=C[C@]1(C)CCC2=C(CC[C@@]3(O)[C@@](C)(C(=O)O)[C@H](O)CC[C@]23C)[C@@H]1OC	2020	Site combinations	Diterpenoids	Talaromyces	Fungi
CC1(C)C[C@H](O)[C@]2(C(=O)O)CC[C@]3(C)C(=CC[C@@H]4[C@@]5(C)CC[C@H](O[C@@H]6O[C@H](O[C]O)[C@@H](O)C(OC[C@@H]7OC[C@H](O)[C@H](O)[C@H]7O)[C@H]6O)[C@@](C)(C=O)[C@@H]5CC[C@]43C)[C@@H]2C1	2020	Site combinations	Triterpenoids	Silene	Viridiplantae
CO[C@H]1O[C@@H](OC)[C@H]2C(=C1COC(=O)CC(C)C)C=C[C@]2(O)COC(C)=O	2020	New modifications	Monoterpenoids	Patrinia	Viridiplantae
C=C1C[C@H](C(=O)OC)[C@]2(C)CC[C@]3(C)[C@H]4[C@H](O)[C@@H](O)[C@@]5(CO)[C@@H](CC[C@H](O)[C@@H]5C)[C@]4(C)CC[C@]3(O)[C@]2(O)C1	2020	New modifications	Others	Galphimia	Viridiplantae
CC1=C/C(=C2/[C@H](C)CC[C@@H]2C(C)C)OC1=O	2020	New skeletons	Others	Rhodotus	Fungi
COC(=O)C1=CO[C@@H](O[C@@H]2O[C@H](CO)[C@@H](O)[C@H](O)[C@H]2O)[C@H]2[C@@H]1C[C@H](O)[C@@H]2C	2020	New modifications	Monoterpenoids	Nothapodytes	Viridiplantae
C=C[C@]1(C)C=C2[C@@H](OC=O)C[C@@H]3[C@](C)(CCC[C@]3(C)CCOC=O)[C@H]2CC1	2020	New sites	Diterpenoids	Callicarpa	Viridiplantae
COC(=O)/C1=C\C=C(\C(C)C)CC[C@]2(C)O[C@H]2CC/C(C(=O)OC)=C/CC1	2020	New modifications	Diterpenoids	Sarcophyton	Metazoa
COC(=O)/C1=C\[C@@H](OC(C)=O)C/C(C)=C/C=C(/C(C)C)C[C@H](O)/C(C)=C/CC1	2020	New modifications	Diterpenoids	Sarcophyton	Metazoa
C=C(C)[C@@H]1CC[C@@H]2[C@]3(CC[C@]4(C)[C@@H]5[C@H](C[C@@]24C)O[C@]2(C=C(C)C(=O)O2)C[C@H]5C)C[C@]13CCC(=O)OC	2020	Site combinations	Triterpenoids	Pseudolarix	Viridiplantae
Cc1c(O)cc2c(c1C)C(=O)O[C@@H]([C@@]1([C@@H]3CC=C4CCC[C@H](C)[C@@]4(C)C3)CO1)O2	2020	New modifications	Sesquiterpenoids	Colletotrichum	Fungi
C=C1CC[C@H]2C(C)(C)CCC[C@]2(C)[C@H]1CCC(=O)CCO	2020	Site combinations	Diterpenoids	Globba	Viridiplantae
CCCCCCCCCCCC(=O)O[C@@]12C[C@@H](C)[C@]3(O)[C@@H]4C=C(C)C(=O)[C@@]4(O)C=C(CO)[C@H](O)[C@H]3[C@@H]1C2(C)C	2020	New modifications	Diterpenoids	Reutealis	Viridiplantae
CC(C)[C@@H]1CC[C@]2(C)[C@H]1[C@@H](O)[C@]1(O)CC[C@H]2O1	2020	New skeletons	Sesquiterpenoids	Echinacea	Viridiplantae
CCCCCC(=O)N[C@@H](c1ccccc1)[C@@H](O)C(=O)O[C@@H]1C[C@@]2(O)[C@@H](OC(=O)c3ccccc3)[C@@H]3[C@]4(OC(C)=O)CO[C@@H]4C[C@@H](O)[C@@]3(C)C(=O)[C@H](OC(C)=O)C(=C1C)C2(C)C	2020	New modifications	Diterpenoids	Taxus	Viridiplantae
C=C1CC[C@H]2[C@@](C)(CO)CCC[C@]2(C)[C@@H]1CCC(C)=O	2020	New modifications	Diterpenoids	Hesperocyparis	Viridiplantae
C=C(C)[C@H]1CC[C@@]23C=C(C=O)[C@@H](CC2)C[C@H]3[C@]1(C)CCC(=O)O	2020	New modifications	Diterpenoids	Excoecaria	Viridiplantae
CC(C)C1=C(O)C(=O)C2=C(C1=O)C(=O)[C@H](O)[C@H]1C(C)(C)CCC[C@]21C	2020	New sites	Diterpenoids	Salvia	Viridiplantae
CC1=C(CCC2=CC(=O)OC2O)[C@@]2(C)CC[C@@H](O)C(C)(C)[C@@H]2CC1=O	2020	New modifications	Diterpenoids	Rydingia	Viridiplantae
C=C1CC23CC4C5[C@]67C[C@H](OC(=O)C(C)CC)C[C@@]5(C)CN4C6[C@]2(O)[C@H](OC(C)=O)C1[C@H](O)C37	2020	New modifications	Diterpenoids	Aconitum	Viridiplantae
C=C1CC[C@H]2[C@@](C)(C(=O)O[C@@H]3O[C@H](CO)[C@@H](O)[C@H](O)[C@H]3O)CCC[C@]2(C)[C@H]1CCC1=CCOC1=O	2020	New modifications	Diterpenoids	Pinus	Viridiplantae
C=C(CC[C@H](C)[C@H]1CC[C@H]2C3=CC[C@H]4[C@@H](C)[C@H](O)CC[C@]4(C)C3=C[CH][C@@]21C)C(C)C	2020	New modifications	Steroids	Taiwanofungus	Fungi
CC(=O)O[C@H]1[C@@H](O)C[C@]2(C)c3ccc(C(C)C)cc3C[C@@H]3OC(=O)[C@@]1(C)C32	2020	New sites	Diterpenoids	Phalaris	Viridiplantae
C=C(C)C1CCC2(C1)[C@@H](C)C[C@@H](O)C[C@H]2CO	2020	New modifications	Sesquiterpenoids	Solanum	Viridiplantae
CC1(C)CCC2=C(C1)C1=CC[C@@H]3[C@@]4(C)CC[C@@H](O)C(C)(C)[C@@H]4CC[C@@]3(C)[C@]1(C)CC2	2020	New modifications	Triterpenoids	Rhododendron	Viridiplantae
COC1=CC(=O)C2=C(C=CC(C)(CCC3=C(C)CCCC3(C)C)O2)C1=O	2020	New sites	Meroterpenoids	Spongia	Metazoa
COc1c(C(C)C)cc2c(c1O)[C@@]1(C(=O)O)CCC[C@](C)(COC(C)=O)C1CC2	2020	New sites	Diterpenoids	Salvia	Viridiplantae
CC(=O)O[C@H]1C[C@H]2[C@@](C)(CC[C@H]3C(C)(C)CCC[C@@]32CO)[C@@H]2CC=C(C(C)=O)[C@H](C(=O)O)[C@@]12C	2020	New modifications	Sesterterpenoids	Lendenfeldia	Metazoa
CC1=C2C(=O)OC[C@@H](C(=O)O[C@H]3[C@H](O[C@@H]4OC=C[C@H]5[C@H](O)[C@@H]6O[C@]6(C)[C@@H]45)O[C@H](CO)C(O)[C@H]3O)[C@H]2CC1	2020	New modifications	Monoterpenoids	Linaria	Metazoa
CC1=C2CC[C@]3(C)O[C@H]3CC/C(C)=C/CC[C@@](C)(O)/C=C/2OC1=O	2020	Site combinations	Diterpenoids	Sarcophyton	Metazoa
CC(C)(O)CCC[C@]1(C)Oc2ccc(C(=O)O)cc2O1	2020	New modifications	Monoterpenoids	Hyrtios	Metazoa
CCC(C)C(=O)c1c(O)c([C@@H](C2=C(O)C(C)(C)C(=O)C(C)(C)C2=O)C(C)C)c2c(c1O)[C@H]1C[C@H](C(C)C)C=C[C@@]1(C)O2	2020	New modifications	Meroterpenoids	Callistemon	Viridiplantae
C=C(C)[C@@]12OC3(/C=C/C=C\CCCCC)O[C@H]1[C@@H]1[C@H]4OC4(CO)[C@H](O)[C@]4(O)C(=O)C(C)=C[C@H]4[C@@]1(O3)[C@@H](C)[C@@H]2OC(C)=O	2020	New modifications	Diterpenoids	Daphne	Viridiplantae
C=C(CC[C@H](C)[C@H]1CC[C@H]2C3=C(C(=O)C[C@@]21C)[C@@]1(C)CC[C@H](O)[C@H](O)[C@@H]1C[C@H]3O)[C@@H](C)C(=O)O	2020	New modifications	Steroids	Taiwanofungus	Fungi
C=C1CC[C@H]2[C@@](C)(C(=O)O[C@@H]3O[C@H](CO)[C@@H](O)[C@H](O)[C@H]3O)CCC[C@]2(C)[C@H]1CC/C(=C\CO)CO	2020	New modifications	Diterpenoids	Pinus	Viridiplantae
CC(=O)/C(C)=C1/[C@H]2OC(=O)[C@]1(C)CC[C@H]2[C@H](C)C(=O)O	2020	Site combinations	Sesquiterpenoids	Artemisia	Viridiplantae
C=C1[C@@H](Cc2c(O)c(C)c(C)oc2=O)[C@@]2(C)CC[C@H]3OC(C)(C)[C@@H](O)CC[C@]3(C)[C@@H]2C[C@H]1O	2020	New modifications	Meroterpenoids	Aspergillus	Fungi
CC1=CC(=O)[C@@H]([C@H](C)C(=O)O)[C@@H]1C	2020	Site combinations	Monoterpenoids	Aspergillus	Fungi
CC(C)c1ccc2c(c1)CC[C@@H]1[C@]2(C)CCC[C@@]1(C)CO	2020	New modifications	Diterpenoids	Tripterygium	Viridiplantae
CC(C)[C@]12C=C3[C@@](O)(CC[C@@]3(C)O)[C@](C)(CC1)O2	2020	New modifications	Sesquiterpenoids	Curcuma	Viridiplantae
C=C(C=O)[C@H]1C[C@H](OC(=O)CC(C)C)C(C)=C1C=O	2020	New modifications	Monoterpenoids	Valeriana	Viridiplantae
C/C1=C\CC[C@@]2(C)O[C@@H]2C[C@H]2C(=O)C=C(C(C)C)[C@]2(O)CC1	2020	New sites	Diterpenoids	Casearia	Viridiplantae
C/C=C(\C)C(=O)CCC[C@@]12[C@@H](O)C[C@@H](C)[C@](C)(CC/C(C)=C/C(=O)OC)[C@H]1CCC[C@]21CO1	2020	New skeletons	Diterpenoids	Ajuga	Viridiplantae
C[C@H](CCC(=O)C(C)(C)O)[C@@H]1CC[C@]2(C)C3=CC[C@H]4C(C)(C)C(=O)CC[C@]4(C)[C@H]3CC[C@@]12C	2020	New modifications	Triterpenoids	Jatropha	Viridiplantae
CC1(C)C[C@H](O)[C@]2(C(=O)O)CC[C@]3(C)C(=CC[C@@H]4[C@@]5(C)CC[C@H](O[C@@H]6O[C@H](O[C]O)[C@@H](O)[C@H](O)[C@H]6O)[C@@](C)(C=O)[C@@H]5CC[C@]43C)[C@@H]2C1	2020	Site combinations	Triterpenoids	Silene	Viridiplantae
CC(C)=C/C=C/[C@]1(C)CCC[C@]2(C)Oc3cc(C)cc(O)c3C[C@@H]12	2020	New skeletons	Meroterpenoids	Rhododendron	Viridiplantae
C=C1CC[C@H](Cl)[C@@](O)(CO)C[C@@H](O)C2=C(C(C)(C)O)CC[C@@]2(C)CC1	2020	Site combinations	Diterpenoids	Sansibia	Metazoa
CC1(C)C(=O)CC[C@]2(C)[C@@H]1CC[C@@]13CC[C@@H](C[C@H]12)[C@](C)(O)C3	2020	New modifications	Diterpenoids	Excoecaria	Viridiplantae
CCCCCCCCCCCCCC(=O)O[C@@]12C[C@@H](C)[C@]3(O)[C@@H]4C=C(C)C(=O)[C@@]4(O)C[C@@](O)(CO)[C@H](O)[C@H]3[C@@H]1C2(C)C	2020	Site combinations	Diterpenoids	Reutealis	Viridiplantae
CC1(C)CCC[C@]2(C)C3=C(CC[C@@H]12)C(=O)N(CC(=O)O)C3=O	2020	New modifications	Sesquiterpenoids	Undefined	Others
CC(C)=CCC1=C2OC(C)(C)[C@H](O)[C@H]3/C=C4/CC(C)(C)CC[C@H]4C[C@](C)(C1=O)C(=O)[C@]23C(=O)c1ccccc1	2020	New skeletons	Meroterpenoids	Hypericum	Viridiplantae
COC(=O)[C@]1(C)[C@H](OC(C)=O)CC[C@]2(C)[C@H]3CC[C@@]4(C)[C@H]5[C@H](C[C@]4(C)C3=CC[C@@H]12)OC(=O)[C@@H]5CC(=O)C=C(C)C	2020	New modifications	Triterpenoids	Lantana	Viridiplantae
C[C@@H]1CC[C@H]2C[C@H]3[C@]4(C)CC[C@@H]4[C@@](C)(O)CC[C@]31C2(C)C	2020	New modifications	Diterpenoids	Trichoderma	Fungi
COC(=O)C/C=C1\C[C@@]2(O)CC[C@]3(C)[C@@H]([C@@H](C)[C@H]4CC=C(C)C(=O)O4)CC[C@@]3(C)[C@@H]2CC[C@H]1C(C)(C)O	2020	Site combinations	Triterpenoids	Kadsura	Viridiplantae
C=C1C[C@H](O[C@@H]2O[C@H](COC(=O)/C=C/C)[C@@H](O)[C@H](O)[C@H]2O)[C@H]2[C@H](C)C(=O)O[C@@H]2[C@H]2C(=C)CC[C@@H]12	2020	New modifications	Sesquiterpenoids	Saussurea	Viridiplantae
[CH][C@]1(C)CC[C@]2(C(=O)O)CC[C@]3(C)C(=CC[C@@H]4[C@@]5(C)C[C@H](O)[C@@H](O)[C@@](C)(CO)[C@@H]5[CH]C[C@]43C)[C@@H]2C1	2020	New modifications	Triterpenoids	Rhodomyrtus	Viridiplantae
COc1cc([C@@H]2OC[C@@]3(O)[C@H](c4ccc(O)cc4)OC[C@@]23O)ccc1O	2020	New sites	Others	Valeriana	Viridiplantae
C/C1=C\CC/C(C=O)=C\CC[C@](C)(O)/C=C/[C@@H](C(C)C)CC1	2020	New modifications	Diterpenoids	Euphorbia	Viridiplantae
CC(C)C[C@@H]1C2=C(O[C@]3(C)[C@H]1C[C@@H]1C[C@H]3C1(C)C)C(C)(C)C(=O)C(C)(C)C2=O	2020	New skeletons	Meroterpenoids	Rhodomyrtus	Viridiplantae
CC(=O)O[C@H]1CC/C(C)=C/[C@@H](O)C/C(C)=C/C[C@]2(C(C)C)CC[C@@]1(C)O2	2020	New modifications	Diterpenoids	Boswellia	Viridiplantae
C=C1C[C@H](O)[C@H]2C(C)(C)[C@H](OC(C)=O)CC[C@]2(C)[C@H]1COc1ccc2ccc(=O)oc2c1	2020	New modifications	Sesquiterpenoids	Ferula	Viridiplantae
CC1(C)[C@@H]2C[C@H]1C(=O)C=C2C(=O)O	2020	New modifications	Monoterpenoids	Myristica	Viridiplantae
C=C1CC[C@H]2C(C)(C)CCC[C@]2(C)[C@H]1CCOC(=O)CCO	2020	New modifications	Diterpenoids	Globba	Viridiplantae
CC(C)=C/C=C\[C@H](C)[C@H]1CC[C@]2(C)C[C@@H]3C(C)=CC(=O)/C3=C(\C(=O)O)CC[C@@H]12	2020	New modifications	Sesterterpenoids	Aspergillus	Fungi
C=C1C(=O)O[C@H]2[C@H]1C[C@@H](O)[C@@](C)(O)[C@@H]1CC[C@@](C)(O)[C@H]21	2020	New modifications	Sesquiterpenoids	Anvillea	Viridiplantae
COC(=O)C1=C[C@@H]2[C@@H](C(C)C)CC[C@@H](CO)[C@@H]2OC1	2020	New sites	Sesquiterpenoids	Trichoderma	Fungi
C=CC(=C)[C@H](C[C@@]1(C)[C@H](C)[C@H](O)C[C@@]2(C)C(C)=CC(=O)C[C@@H]21)OO	2020	New modifications	Diterpenoids	Stachys	Viridiplantae
C/C=C(/C)C(=O)O[C@H]1C(C)=C[C@]23C(=O)[C@@H](C=C(C)[C@@H](OC(=O)c4ccccc4)[C@]12O)[C@H]1[C@@H](C[C@H]3C)[C@@]1(C)COC(=O)/C(C)=C/C	2020	New modifications	Diterpenoids	Euphorbia	Viridiplantae
C=C1[C@@H]2CC(=O)O[C@@H]3C[C@H]4C(C)=C[C@H](O[C@@H]5O[C@H](CO)[C@@H](O)[C@H](O[C@@H]6O[C@H](CO)[C@@H](O)[C@H](O)[C@H]6O)[C@H]5O)[C@@H](O)[C@]4(C)[C@@H]4[C@]23CO[C@@]4(O)[C@@H]1O	2020	New modifications	Triterpenoids	Ailanthus	Viridiplantae
C=C(CO)[C@H]1C[C@@H](O)[C@H](C)[C@H]2CCC(C(=O)O)=C[C@H]12	2020	New sites	Sesquiterpenoids	Myristica	Viridiplantae
CC(=O)[C@@H](C)CCC[C@@H](C)[C@@H]1CC[C@H](C)C(=O)O1	2020	New modifications	Sesquiterpenoids	Penicillium	Fungi
CC(=O)O[C@H]1CC[C@@]2(C)[C@@H](CC[C@]3(C)[C@@H]2CC[C@@H]2[C@@H](C(=O)O)CC[C@]23C)C1(C)C	2020	New modifications	Triterpenoids	Artemisia	Viridiplantae
C=C1[C@@H](CO)C[C@H](O)[C@H](C)[C@@H]2CC(C)(C)C[C@]12O	2020	Site combinations	Sesquiterpenoids	Irpex	Fungi
CC(=O)OC(C)(C)/C=C/C(=O)[C@](C)(O)[C@H]1[C@H](O)C[C@@]2(C)[C@@H]3[C@@H](O)C=C4[C@@H](CC(=O)[C@H](O)C4(C)C)[C@]3(C)C(=O)C[C@]12C	2020	New modifications	Triterpenoids	Dendrobium	Viridiplantae
C=C[C@@H]1C(=C)C[C@H]2[C@@H](CCC3C(C)(C)CCC[C@@]32C)[C@@H]1O	2020	New sites	Diterpenoids	Eragrostis	Viridiplantae
C=C[C@@]1(C)C=C2C=C[C@H]3[C@@](C)(CO)CCC[C@]3(C)[C@H]2CC1	2020	New modifications	Diterpenoids	Callicarpa	Viridiplantae
CC(=O)O[C@H]1C2=CC(=O)[C@](O)(C2)C(C)(C)/C=C/[C@H](C)C(=O)[C@@]2(O)C[C@@](C)(OC(C)=O)[C@H](OC(=O)c3ccccc3)[C@H]12	2020	New modifications	Diterpenoids	Euphorbia	Viridiplantae
CO[C@@]1(CO)C[C@@H](C)[C@H]2[C@H](C[C@@]3(C)[C@@H]4CC[C@H]5C(C)(C)[C@@H](O[C@@H]6OC[C@@H](O)[C@H](O)[C@H]6O)CC[C@@]56C[C@@]46C[C@@H](OC(C)=O)[C@]23C)O1	2020	New modifications	Triterpenoids	Actaea	Viridiplantae
COC(=O)[C@@H](CO)[C@@H]1[C@H](C(=O)O)[C@@](C)(OC(C)=O)C[C@H]1O	2020	New modifications	Monoterpenoids	Morinda	Viridiplantae
CC1=C[C@@H]2C3=C(C)C(=O)OC3=C[C@H](C)[C@@H]2CC1	2020	New modifications	Sesquiterpenoids	Mikania	Viridiplantae
CC(=O)[C@@]1(C)CC[C@]2(C)C[C@@]34[C@@H](C)C=CC(=O)[C@]3(C)CC[C@H]4[C@H]12	2020	New skeletons	Diterpenoids	Penicillium	Fungi
C/C(=C/CC/C(CO)=C1\CC[C@]2(C)[C@@H]1CC[C@@H]1[C@@]3(C)CCC(=O)C(C)(C)[C@@H]3CC[C@]12C)CO	2020	Site combinations	Triterpenoids	Rhus	Viridiplantae
C=C1C[C@]23CC[C@H]4[C@](C)(C(=O)O[C@@H]5O[C@H](CO)[C@@H](O)[C@H](O)[C@H]5O)CCC[C@]4(C)[C@H]2CC[C@]1(O[C@@H]1O[C@H](CO)[C@@H](O)[C@H](O)[C@H]1O[C@@H]1O[C@H](CO)[C@@H](O)[C@H](O)[C@H]1O)C3	2020	New modifications	Diterpenoids	Stevia	Viridiplantae
C=C[C@@]1(O)[C@@H](O)C[C@H]2[C@@H](CC[C@H]3[C@](C)(C(=O)O)CCC[C@]23C)[C@H]1C	2020	Site combinations	Diterpenoids	Erythrophleum	Viridiplantae
COC12CC(C)=C3CC[C@@](O)(CS)[C@H]3CC1=C(C)C(=O)O2	2020	Site combinations	Sesquiterpenoids	Artemisia	Viridiplantae
COC(=O)[C@H]1[C@H]2C[C@@]34O[C@H](CN3CCc3c4[nH]c4ccccc34)[C@H]2CO[C@H]1O	2020	New modifications	Meroterpenoids	Neolamarckia	Viridiplantae
CC[C@@H](/C=C/[C@H](C)[C@H]1CC[C@H]2[C@@H]3CC=C4C[C@H](O)CC[C@]4(C)[C@H]3CC[C@@]21C)C(C)C	2020	New modifications	Steroids	Excoecaria	Viridiplantae
C/C=C(/C)C(=O)O[C@@H]1[C@@H]2OC[C@]3(C)C(OC(C)=O)CC(OC(C)=O)[C@@](C)(C23)C2CC(O)OC3C[C@@H](c4ccco4)C(C)=C3[C@@]21C	2020	New modifications	Triterpenoids	Melia	Viridiplantae
C[C@H]1CCC=C(CO)[C@@]12CC[C@H](C(C)(C)O)C2	2020	New modifications	Sesquiterpenoids	Trillium	Viridiplantae
CC(=O)O[C@@H]1C[C@H]2O[C@@H]3C=C(COC4OC(CO)C(O)C(O)C4O)CC[C@]3(C)[C@]1(C)[C@]21CO1	2020	New modifications	Sesquiterpenoids	Trichoderma	Fungi
CC(=O)O[C@@H]1C[C@@](C)([C@H]2OC(=O)C[C@@H]2CO)C2=CC(=O)O[C@@H]3C[C@H]4C=CCC(=O)[C@]4(C)[C@@H]1[C@]23C	2020	New sites	Others	Eurycoma	Viridiplantae
C[C@H]1C(=O)[C@@H](O)[C@@H]2C(C)(C)C(=O)CC[C@@]2(C)[C@]1(O)CCc1ccoc1	2020	New modifications	Diterpenoids	Leonurus	Viridiplantae
COC(=O)CC1C(=O)C[C@H]2C([C@@H]1C)[C@H](O)[C@H](OC(=O)C=Cc1ccccc1)[C@@]1(O)C(C)(C)[CH]CC[C@]21C	2020	New modifications	Diterpenoids	Caesalpinia	Viridiplantae
C=C1C[C@H]2[C@]3(C)Cc4cccnc4C(C)(C)[C@H]3C(=O)[C@@H](O)[C@]2(C)[C@@H](C(=O)OC)[C@]1(C)C(=O)[C@](C)(O)C(=O)OC	2020	New skeletons	Meroterpenoids	Aspergillus	Fungi
C=C[C@@]1(C)CC[C@H](C(C)(O)CC(O)C=C(C)C)O1	2020	New modifications	Sesquiterpenoids	Solanum	Viridiplantae
C/C=C1/[C@@H](O[C@H]2OC(CO)[C@@H](O)[C@@H](O)C2O)OC=C(C(=O)OC)[C@@H]1CC(=O)OC[C@H]1[C@H](c2ccc(O)c(OC)c2)OC[C@]1(O)Cc1ccc(O)c(OC)c1	2020	New sites	Others	Undefined	Others
CC1(C)CC[C@]2(C(=O)O)CC[C@]3(C)C(=CCC4[C@@]5(C)C[C@@H](O)[C@H](O[C@H]6O[C@H](COC(=O)c7cc(O)c(O)c(O)c7)[C@@H](O)[C@H](O)[C@H]6O)[C@@](C)(C(=O)O)C5CC[C@]43C)[C@@H]2[C@@H]1O	2020	New sites	Triterpenoids	Quercus	Viridiplantae
CC1(C)C[C@H]2C3=CC[C@@H]4[C@@]5(C)C[C@@H](OC(=O)CO)[C@H](O)C(C)(C)[C@@H]5CC[C@@]4(C)[C@]3(C)CC[C@@]2(C(=O)O)CC1O[C@@H]1O[C@H](CO)[C@@H](O)C(O)[C@H]1OC(=O)CO	2020	New sites	Triterpenoids	Anchusa	Viridiplantae
CC(=O)O[C@@H]1CC[C@]2(C)[C@H]3CC[C@]4(C)[C@@H]5[C@H](C[C@@]4(OO)C3=CC[C@H]2C1(C)C)OC(=O)[C@@H]5CC(=O)C=C(C)C	2020	New modifications	Triterpenoids	Tricholoma	Fungi
CC(C)[C@@H]1CC[C@]2(C)[C@H]1[C@H](O)[C@]1(CO)CC[C@H]2O1	2020	New modifications	Sesquiterpenoids	Echinacea	Viridiplantae
CC1=C[C@H](C)[C@H]2OC(=O)c3c(O)c(C)cc(C)c3[C@H]2O1	2020	New skeletons	Meroterpenoids	Ganoderma	Fungi
CCCCC[C@@H]1c2c(O)cc(O[C@@H]3O[C@H](CO)[C@@H](O)[C@H](O)[C@H]3O)cc2O[C@]2(O)[C@@H]([C@@H](O)CO)OC(=O)[C@]12O	2020	New skeletons	Others	Syzygium	Viridiplantae
COC(=O)/C1=C\[C@@H](OC(C)=O)C/C(C)=C/C=C(/C(C)C)CC/C(C)=C/CC1	2020	New modifications	Diterpenoids	Sarcophyton	Metazoa
COC(=O)[C@]1(C)CCC[C@]2(CO[C@@H]3O[C@@H](O)C45CCC[C@@]3(C(=O)OC)[C@@H]4CC[C@@H]3[C@@H]5Cc4occc4[C@@H]3C)[C@H]3Cc4occc4[C@H](C)[C@@H]3CC[C@H]21	2020	New modifications	Diterpenoids	Caesalpinia	Viridiplantae
C=C[C@@]1(C)CC[C@H]2C(=CC[C@H]3[C@@](C)(C(=O)O)CCC[C@]23C)[C@H]1O	2020	New modifications	Diterpenoids	Callicarpa	Viridiplantae
C=C[C@]12[C@H]3OC4=C(C)C(=O)[C@](C)(C(C)=C[C@H]1[C@]1(C=O)CC[C@H](OC(C)=O)C(C)(C)[C@H]1[C@H]3O)[C@@]42C(=O)OC	2020	New skeletons	others	Penicillium	Fungi
C=C1CC[C@H]2[C@@](C)(C(=O)O)CCC[C@]2(C)[C@@H]1CC/C(C)=C/COC(C)=O	2020	New modifications	Diterpenoids	Hesperocyparis	Viridiplantae
C=C(C)C1CCC2(C)CCCC(C)(OC3OC(CO)C(O)C(O)C3OC(=O)/C=C/c3ccccc3)C2C1	2020	New modifications	Sesquiterpenoids	Fissistigma	Viridiplantae
CCCCOC(=O)[C@H]1O[C@@H](O[C@H]2CC[C@@]3(C)[C@@H](CC[C@]4(C)[C@@H]3CC=C3[C@H]5[C@](C(=O)O[C@@H]6O[C@H](CO)[C@@H](O)[C@H](O)[C@H]6O)(CC[C@@H](C)[C@@]5(C)O)CC[C@]34C)C2(C)C)[C@H](O[C@@H]2OC[C@@H](O)[C@H](O)[C@H]2O)[C@@H](O)[C@@H]1O	2020	New sites	Triterpenoids	Bousigonia	Viridiplantae
CC1=C2C=C3CCC4C(C)(C)CC[C@H](O)[C@@]4(C)[C@]3(O)C[C@H]2OC1=O	2020	New sites	Diterpenoids	Euphorbia	Viridiplantae
CC1=C(COC(=O)CO)[C@@H]2[C@H](CO)[C@@]1(C)CC[C@@H]2C(C)C	2020	New modifications	Sesquiterpenoids	Bipolaris	Fungi
COc1cc(/C=C/C(=O)O[C@@H]2[C@@H]3O[C@]3(CO)[C@H]3[C@H](O[C@@H]4O[C@H](CO)[C@H](O)[C@H](O)[C@H]4O)O[C@H](OCC4O[C@@H](O[C@@H]5OC=C[C@H]6[C@H](OC(=O)c7ccc(O)c(OC)c7)[C@@H]7O[C@]7(CO)[C@@H]56)[C@H](O)C(O)C4O)C[C@@H]23)ccc1O	2020	New modifications	Monoterpenoids	Picrorhiza	Viridiplantae
CC(=O)O[C@@H]1[C@H](O)C[C@@]2(C)[C@@H](CC[C@]3(C)[C@@H]2CC=C2C4[C@](C(=O)O)(CC[C@@H](C)[C@@]4(C)O)CC[C@]23C)C1(C)C	2020	New sites	Triterpenoids	Rosa	Viridiplantae
CC(=O)O[C@H]1CC[C@@](C)(O)/C=C/C(=O)/C(C)=C/C[C@]2(C(C)C)CC[C@@]1(C)O2	2020	New modifications	Diterpenoids	Populus	Viridiplantae
CC(C)=CCC/C(C)=C/CCC1=C[C@]2(OC1=O)c1cc(O)ccc1O[C@H](O)[C@@]21C=C2c3cc(O)ccc3O[C@@](C)(CCC=C(C)C)[C@@H]2CC1	2020	New skeletons	others	Ganoderma	Fungi
C=C(C)[C@H]1CC[C@@]23CC[C@@H](C[C@H]2[C@]1(C)CCC(=O)O)C(=O)C3	2020	New skeletons	Others	Excoecaria	Viridiplantae
CC1=CC(=O)C(=C(C)C)C[C@]23O[C@@]2(C)CC[C@@]13O	2020	Site combinations	Sesquiterpenoids	Curcuma	Viridiplantae
CC(=O)O[C@@H]1O[C@@H](CO)[C@H](O[C@@H]2O[C@@H](CO)[C@@H](O)[C@@H](O)[C@@H]2O)[C@@H](O)[C@@H]1O[C@@H]1[C@H](O)[C@@H](O)[C@H](O)[C@@H](CO)[C@H]1OC(C)=O	2020	New sites	Others	Isodon	Viridiplantae
C/C=C(\C)C(=O)O[C@H]1C(C)(C)[C@H]([C@H](O)C(=O)OC)[C@]2(C)C(=O)[C@@]1(O)[C@H]1O[C@]13C1=CC(=O)O[C@@H](c4ccoc4)[C@]1(C)CC[C@H]23	2020	New modifications	Triterpenoids	Heynea	Viridiplantae
C=CC(C)(CC/C=C(\C)CO)O[C@H]1OC(CO)[C@@H](O)C(O)[C@H]1O	2020	New modifications	Monoterpenoids	Solanum	Viridiplantae
COC(=O)/C1=C\CC[C@@]2(C)O[C@H]2/C=C(/C(C)C)CC[C@@]2(C)O[C@H]2CC1	2020	New modifications	Diterpenoids	Sarcophyton	Metazoa
C[C@@]1(C(=O)CO)C=C2CC[C@H]3[C@@](C)(CC[C@@H](O)[C@@]3(C)CO)[C@@H]2CC1	2020	New modifications	Diterpenoids	Sigesbeckia	Viridiplantae
C=C[C@]1(C)C=C2[C@@H](OC)C[C@H]3[C@@](C)(COC=O)CCC[C@]3(C)[C@H]2CC1	2020	New modifications	Diterpenoids	Callicarpa	Viridiplantae
C/C=C(\C)C(=O)O[C@H]1C[C@@]2(C)C(C[C@@]1(C)C=O)[C@@]1(O)C(=O)CC3[C@@]4(C)CC[C@H](O[C@@H]5OC[C@H](O[C@@H]6O[C@H](CO)[C@@H](O)[C@H](O)[C@H]6O)[C@H](O)[C@H]5O[C@@H]5O[C@H](CO)[C@@H](O)[C@H](O)[C@H]5O)[C@@](C)(CO)C4CC[C@@]3(C)[C@]1(C)C[C@@H]2O	2020	New sites	Triterpenoids	Avena	Viridiplantae
CC(C)c1c(O)ccc2c1CC[C@H]1C(C)(C)CC[C@H](O)[C@]21C	2020	New modifications	Diterpenoids	Dacrycarpus	Viridiplantae
C=C(C)[C@]12[CH][C@H](C)[C@@]34OC(/C=C/C=C/CCCCC)(O[C@H]1[C@@H]3[C@H]1OC1(CO)[C@H](O)[C@]1(O)C(=O)C(C)=C[C@H]14)O2	2020	New modifications	Diterpenoids	Daphne	Viridiplantae
C[C@H]1[C@H](CO)[C@@H]2C[C@H]3c4[nH]c5ccccc5c4C[C@@H](C2Cl)N31	2020	New skeletons	Others	Rauvolfia	Viridiplantae
C=C[C@]1(C)Cc2occ(C)c2C(=O)[C@H]1C(=C)C	2020	New modifications	Sesquiterpenoids	Commiphora	Viridiplantae
CC(=O)O[C@@H]1C[C@@](C)([C@H]2OC(=O)C[C@@H]2CO)C2=CC(=O)O[C@@H]3C[C@H]4C(C)(C)C=CC(=O)[C@]4(C)[C@@H]1[C@]23C[C]=O	2020	New skeletons	Others	Eurycoma	Viridiplantae
COC(=O)C(C)[C@]1(O)C[C@H]2C(=C(C)CC1=O)CC[C@H]2C	2020	New modifications	Sesquiterpenoids	Stellera	Viridiplantae
CO[C@@H]1C[C@@H](C)[C@H](OC(C)=O)c2c1c(C)cc1c2[C@@H](C)C(=O)O1	2020	New modifications	Sesquiterpenoids	Commiphora	Viridiplantae
C=C(O[C@H]1C(C)=C[C@]23C(=O)[C@@H](C=C(C)[C@@H](O)[C@]12O)[C@H]1[C@@H](C[C@H]3C)[C@@]1(C)COC(=O)/C(C)=C\C)/C(C)=C/C	2020	New modifications	Diterpenoids	Euphorbia	Viridiplantae
C[C@@H](CC(=O)C[C@@H](C)[C@H]1C[C@@H](O)[C@@]2(C)C3=C(C(=O)C[C@]12C)[C@@]1(C)CC[C@H](O)C(C)(C)[C@@H]1CC3=O)C(=O)O[C@@H](CC[C@@H](C)[C@H]1CC[C@@]2(C)C3=CC[C@H]4C(C)(C)C(=O)CC[C@]4(C)C3=CC[C@]12C)[C@](C)(O)CO	2020	New modifications	Triterpenoids	Ganoderma	Fungi
CC1(C)[C@@H](O)CC[C@@]2(C)[C@H]1C(=O)C[C@@]1(O)C[C@](C)(O)[C@H]3CC[C@]12[C@@H]3O	2020	New sites	Diterpenoids	Botrytis	Fungi
C=Cc1c(C)c(O)cc2c1CC[C@H]1C2=CC[C@@H](O)C1(C)C	2020	New sites	Diterpenoids	Aspidopterys	Viridiplantae
CO[C@H]1O[C@@H]([C@H](O)C(C)(O)CO)C[C@H]1[C@@H]1CC=C2[C@@]1(C)CC[C@@H]1[C@@]3(C)CC[C@H](OC(=O)C=C(C)C)C(C)(C)[C@@H]3C[C@H](O)[C@@]21C	2020	New modifications	Triterpenoids	Toona	Viridiplantae
CC(C)(O)[C@H]1C[C@H]2O[C@@]2(C)CC[C@@H]2O[C@]2(C)[C@H](O)C1	2020	Site combinations	Sesquiterpenoids	Solanum	Viridiplantae
C[C@H](C[C@H](O)[C@@H](O)C(C)(C)O)C1=C2C[C@H](O)[C@H]3[C@@]4(C)CCC(=O)C(C)(C)[C@@H]4CC[C@]3(C)[C@@]2(C)CC1	2020	New modifications	Triterpenoids	Alisma	Viridiplantae
CC1(C)CC[C@]2(C(=O)O)CC[C@]3(C)C(=CCC4[C@@]5(C)CC[C@H](O[C@@H]6OC[C@H](O)[C@H](O)[C@H]6O[C@@H]6O[C@H](CO)[C@@H](O)[C@H](O)[C@H]6O)C(C)(C)C5CC[C@]43C)C2[C@@H]1O	2020	Site combinations	Triterpenoids	Ilex	Viridiplantae
C[C@H]1[C@H](C)C[C@H](O)[C@]2(C)CC=C3[C@@](C)(C(=O)[C@@H](O)[C@@H]4[C@@]5(C)CC[C@H](O)[C@@](C)(C(=O)O)[C@@H]5CC[C@@]34C)[C@H]12	2020	New sites	Triterpenoids	Stewartia	Viridiplantae
C[C@]1(CCO)C[CH][C@H]2C(=CC[C@H]3[C@@](C)(O)CCC[C@]23C)C1	2020	New skeletons	Diterpenoids	Xylaria	Fungi
C/C(=C\COc1ccc2ccc(=O)oc2c1)CC[C@@H]1[C@]2(C)CC[C@@H](O)[C@@]1(C)CCO2	2020	New skeletons	Sesquiterpenoids	Ferula	Viridiplantae
CC1=C(C(=O)O)[C@]23C[C@H](C(C)C)[C@@H]2[C@H](COC=O)[C@@]1(C)C3	2020	New skeletons	Sesquiterpenoids	Bipolaris	Fungi
C=C1CC[C@@H](C(C)C)[C@H]2/C=C(/C(=O)OC)CC/C=C(\C(=O)O)[C@H](O)C[C@H]12	2020	New sites	Diterpenoids	Streptomyces	Bacteria
CC(=O)O[C@@H]1/C=C(\CO)[C@H](OC(=O)CCc2ccccc2)C[C@@H]2[C@H](/C=C(\C)[C@@H]1O)[C@@]2(C)CO	2020	New modifications	Sesquiterpenoids	Plagiochila	Viridiplantae
C=C(C)C(=O)O[C@@H]1C/C(CO)=C/CC[C@@H](CO)C[C@H]2OC(=O)C(=C)[C@H]12	2020	New modifications	Sesquiterpenoids	Sigesbeckia	Viridiplantae
C[C@@H](CC(=O)C[C@@H](C)[C@H]1C[C@@H](O)[C@@]2(C)C3=C(CC[C@]12C)[C@@]1(C)CCC(=O)C(C)(C)[C@@H]1CC3=O)C(=O)O	2020	New modifications	Triterpenoids	Ganoderma	Fungi
CO[C@H]1C2=C(C(=O)N1CC(=O)O)[C@H](OC)C[C@@H]1[C@]2(C)[C@H](O)C[C@@H]2[C@@]3(C)CCCC(C)(C)[C@@H]3CC[C@@]12C	2020	New sites	Sesterterpenoids	Hyrtios	Metazoa
CC1(C)CC[C@]2(C(=O)O[C@@H]3O[C@H](CO[C@]4(C)O[C@H](CO)[C@@H](O)[C@H](O)[C@H]4O)[C@@H](O)C3(O)O)CCC3(C)C(=CCC4C5(C)CCC(O[C@@H]6OC[C@H](O)[C@H](O)[C@H]6O[C@@H]6O[C@H](CO)[C@@H](O)[C@H](O)[C@H]6O)C(C)(C)C5CCC43C)[C@@H]2C1	2020	New modifications	Triterpenoids	Stauntonia	Viridiplantae
C[C@@]12CC[C@H]3[C@@](C)(CO)[C@H](O)CC[C@]3(C)[C@H]1CC[C@H]1C(=CC(=O)[C@@H]3[C@@](C)(CO)[C@H](O)[C@@H](O)C[C@@]31C)C2	2020	New modifications	Triterpenoids	Diphasiastrum	Viridiplantae
C/C=C(\C)C(=O)O[C@H]1C[C@@H](OC(=O)/C(C)=C/C)[C@](C)(C=O)C2[C@@H](O)[C@H]3O[C@@H]4C[C@@H](c5ccoc5)C(C)=C4[C@@]3(C)[C@H](CC(=O)OC)[C@]21C	2020	New modifications	Triterpenoids	Melia	Viridiplantae
C/C1=C\CC[C@@]2(C)OC(C)(C)[C@H](CC[C@](C)(O)/C=C/C1)C[C@@H]2O	2020	Site combinations	Diterpenoids	Lobophytum	Metazoa
C/C(=C\C(=O)C[C@H](C)C(=O)O)[C@H]1CC(=O)[C@@]2(C)C3=C(C(=O)[C@H](O)[C@]12C)[C@@]1(C)CCC(=O)C(C)(C)[C@@H]1CC3O	2020	New modifications	Triterpenoids	Ganoderma	Fungi
COc1cc(/C=C/C(=O)O[C@H]2C[C@@H](C(C)C)[C@@H](O[C@@H]3O[C@H](CO)[C@@H](O)[C@H](O)[C@H]3O)[C@H]3C(C)=CC[C@@H](O)[C@]23C)ccc1O	2020	New modifications	Sesquiterpenoids	Aster	Viridiplantae
C[C@H]1[C@@H](O)C[C@H](CO)C(CO)=C2CC(C)(C)C[C@@H]21	2020	New modifications	Sesquiterpenoids	Phellinus	Fungi
CC(=O)OC(C)(C)CCC(=O)[C@](C)(O)[C@H]1[C@H](O)C[C@@]2(C)[C@@H]3CC=C(C(C)(C)C(=O)O)[C@@H](CC(=O)O)[C@]3(C)C(=O)C[C@]12C	2020	New modifications	Triterpenoids	Dendrobium	Viridiplantae
C=C1CCC[C@]2(C)Cc3oc(Cc4oc5c(c4C)C[C@H]4C(=C)CCC[C@]4(C)C5)c(C)c3C[C@@H]12	2020	New skeletons	others	Atractylodes	Viridiplantae
C=C1[C@@H]2CC[C@@H]3[C@@](C2)([C@@H]1O)[C@]1(O)OC[C@]32CCCC(C)(C)[C@H]2[C@@H]1O	2020	New sites	Diterpenoids	Isodon	Viridiplantae
COC(=O)C1=CO[C@@H](O[C@@H]2O[C@H](CO)[C@@H](O)[C@H](O)[C@H]2O)[C@@H]2[C@H](C)O[C@@H](OC[C@H]3O[C@@](O)(CO)[C@@H](O)[C@@H]3O)C[C@H]12	2020	New modifications	Monoterpenoids	Cornus	Viridiplantae
CC1(C)CC[C@]2(C(=O)O[C@@H]3O[C@H](CO[C@@H]4O[C@H](CO)[C@@H](O)[C@H](O)[C@H]4O)[C@@H](O)[C@H](O)[C@H]3O)CC[C@]3(C)C(=CCC4[C@@]5(C)CC[C@H](O[C@@H]6OC[C@H](O)[C@H](O)[C@H]6O)C(C)(C)C5CC[C@]43C)[C@@H]2C1	2020	New modifications	Triterpenoids	Stauntonia	Viridiplantae
C=C1C=C(Br)C(=O)C(C)(C)[C@@]12C[C@H](Br)[C@@](C)(Cl)C[C@@H]2OC(C)=O	2020	New modifications	Sesquiterpenoids	Laurencia	Others
CC(=O)O[C@@H]1CO[C@@H](O[C@@H]2CC(C)(C)C[C@H]3C4=CC[C@@H]5[C@@]6(C)CC[C@H](O[C@@H]7O[C@H](C(=O)O)[C@@H](O)[C@H](O)[C@H]7O)C(C)(C)[C@@H]6CC[C@@]5(C)[C@]4(C)C[C@@H](O)[C@]32CO)[C@H](O)[C@H]1OC(C)=O	2020	New modifications	Triterpenoids	Impatiens	Viridiplantae
CC(C)[C@H]1CC(=O)[C@]23[C@@H]4C=C(CO)C[C@@H](O)[C@@H]4[C@@]2(C)CC[C@]13C	2020	New sites	Diterpenoids	Candolleomyces	Fungi
CC(=O)O[C@H](C[C@@H](C)[C@H]1C(=O)[C@H](O)[C@@]2(C)[C@@H]3CC[C@H]4C(C)(C)[C@@H](O[C@@H]5OC[C@@H](O)[C@H](O)[C@H]5O)CC[C@@]45C[C@@]35CC[C@]12C)[C@@H]1OC(=O)OC1(C)C	2020	New modifications	Triterpenoids	Actaea	Viridiplantae
C=C[C@@]1(C)CC=C2[C@@]3(CC[C@H]4C(C)(C)CCC[C@]24C(=O)O3)[C@H]1O	2020	Site combinations	Diterpenoids	Undefined	Others
CC1(C)CCC[C@@]2(C)[C@H]1CC[C@@]1(C)[C@@H]3CC(=O)[C@@]4(C(=O)O)O[C@@]4(C(=O)NCC(=O)O)[C@@]3(C)[C@H](O)C[C@H]21	2020	New sites	Sesterterpenoids	Hyrtios	Metazoa
CC(=O)O[C@@H](CC[C@](C)(O)[C@H]1CC[C@]2(C)[C@@H]1CC[C@@H]1[C@@]3(C)CCC(=O)C(C)(C)[C@@H]3CC[C@]12C)C(C)(C)O	2020	New modifications	Triterpenoids	Cleome	Viridiplantae
C/C=C1/CN2CCc3c([nH]c4ccccc34)[C@@H]2C[C@@H]1[C@H](Cc1c[n+]2c(c3[nH]c4ccccc4c13)C[C@@H]1C(C(=O)OC)=CO[C@@H](C)[C@@H]1C2)C(=O)OC	2020	New skeletons	Meroterpenoids	Picralima	Viridiplantae
C=C(C(=O)OC)[C@@H]1CO[C@@H]2O[C@H](CO)[C@@H](O)[C@H](O)[C@H]2O1	2020	New modifications	Monoterpenoids	Enkianthus	Viridiplantae
C=C(C)[C@@]12OC3(/C=C/C=C/CCCCC)O[C@@H]1[C@@H]1[C@H](O)[C@@](O)(CO)[C@@H](O)[C@]4(O)C(=O)C(C)=C[C@H]4[C@@]1(O3)[C@H](C)[C@H]2OC(=O)c1ccccc1	2020	New modifications	Diterpenoids	Daphne	Viridiplantae
C[C@]1(CO)[C@@H]2CC[C@H](COC(=O)c3ccccc3)[C@H]1C2	2020	New modifications	Monoterpenoids	Myristica	Viridiplantae
CC1(C)C(=O)C(O)=C[C@]2(C)[C@@H]1CC[C@@]13C=C[C@@H](C[C@@H]21)[C@@](C)(O)C3	2020	New modifications	Diterpenoids	Euphorbia	Viridiplantae
CO[C@@H]1O[C@@H](OC)[C@@]2(O)[C@@H](O)C[C@H]3[C@]4(C)CC[C@H]5C(C)(C)CCC[C@]5(C)[C@H]4C[C@@H](O)[C@]3(C)[C@@]12O	2020	New sites	Sesterterpenoids	Hyrtios	Metazoa
Cc1ccc(CC[C@H](O)C(C)(C)O)c(C)c1C	2020	New sites	Sesquiterpenoids	Alkekengi	Viridiplantae
C=C1C2[C@H](O)[C@H](OC(=O)c3ccc(O)cc3)[C@]3(C)C(CCC4[C@@]5(C)CC[C@@H](C(C)(C)O)C5CC[C@]43C)[C@@]2(C)CC[C@@H]1O	2020	New sites	Triterpenoids	Fagaropsis	Viridiplantae
C[C@H]1CC[C@H](CO)[C@@H](CO)C2=CC(C)(C)C[C@@H]21	2020	New modifications	Sesquiterpenoids	Phellinus	Fungi
C=C(C)[C@@]12OC3(/C=C/C=C/CCCCC)O[C@H]1[C@@H]1[C@H]4OC4(CO)[C@H](O)[C@]4(O)C(=O)C(C)=C[C@H]4[C@@]1(O3)[C@@H](C)[C@@H]2OC(=O)C(C)C	2020	New modifications	Diterpenoids	Daphne	Viridiplantae
C=C(C)C(=O)O[C@H]1[C@H]2C(=C)C(=O)O[C@@H]2C[C@@H](C)[C@@H]2O[C@@H]2C(=O)[C@@](C)(O)[C@@H]1OC(C)=O	2020	New modifications	Sesquiterpenoids	Calea	Viridiplantae
COC(=O)CC[C@]12C[C@]13CC[C@]1(C)[C@H]4[C@H](C)C[C@]5(C[C@H](C)C(=O)O5)O[C@@H]4C[C@@]1(C)[C@@H]3CC[C@H]2C(C)(C)O	2020	New modifications	Triterpenoids	Pseudolarix	Viridiplantae
CC(=O)O[C@@H]1CC[C@]2(C)[C@H](COc3ccc4ccc(=O)oc4c3)C(CO)=CC(=O)[C@H]2C1(C)C	2020	New modifications	Sesquiterpenoids	Ferula	Viridiplantae
C=C1CC[C@@]2(OC1)OC1C[C@H]3C4CCC5=CC(=O)C=C[C@]5(C)C4CC[C@]3(C)[C@@]1(O)[C@@H]2C	2020	New modifications	Steroids	Dracaena	Metazoa
CC1(C)[C@@H](OC(=O)CO)C[C@@H]2[C@@]13O[C@]1(C[C@H]3O)C[C@@](C)(O)[C@@H]3CC[C@]1(C3)[C@]2(C)O	2020	New modifications	Diterpenoids	Pieris	Viridiplantae
C=C(CO)C1CC[C@]2(C)C[C@H]3O[C@H]4CC5C(C)(C)[C@H](OC(=O)CCCCCCCCCCCCCCCCCCCCCCC)CC[C@]5(C)C5CCC(C12)[C@]3(C)[C@@]54C	2020	Site combinations	Triterpenoids	Globimetula	Viridiplantae
O=C(/C=C\c1ccccc1O[C@@H]1O[C@H](CO)[C@@H](O)[C@H](O)[C@H]1O)O[C@@H]1[C@@H]2O[C@]2(CO)[C@H]2[C@H](O[C@@H]3O[C@H](CO)[C@@H](O)[C@H](O)[C@H]3O)OC=C[C@@H]12	2020	Site combinations	Monoterpenoids	Callicarpa	Viridiplantae
CC(=O)O[C@H]1[C@@H]2C(C)(C)CCC[C@]23CO[C@@]1(O)[C@@]12C[C@@H](CC[C@H]13)[C@]1(CO1)[C@H]2OC(C)=O	2020	New sites	Diterpenoids	Isodon	Viridiplantae
C=C(CC[C@H](C)[C@H]1CC[C@H]2C3=C(C(=O)C[C@@]21C)[C@@]1(C)CCC(=O)[C@H](C)[C@@H]1C[C@@H]3O)C(C)C	2020	New modifications	Steroids	Taiwanofungus	Fungi
CO[C@@H]1O[C@@H](C)[C@@H]2[C@@H](O)C[C@@H]3[C@](C)(C(=O)C[C@H]4[C@@]3(C)CC[C@H]3C(C)(C)CCC[C@@]34COC(C)=O)[C@H]21	2020	New modifications	Sesterterpenoids	Lendenfeldia	Metazoa
COC(=O)[C@@]12CC(=O)[C@@H](C(C)C)CC(=O)[C@@H](C)CCC[C@@H](C)CC(=O)[C@@H]1CC(C)=C1[C@@H]3C[C@@](C)(O)[C@H](CC[C@](C)(O)C(=O)CC/C(C)=C/[C@H]12)O3	2020	New sites	Sesquiterpenoids	Sarcophyton	Metazoa
CC1=C[C@@H]2C(=C(C)C[C@@H](O)[C@H]2C(C)C)CC1	2020	New modifications	Sesquiterpenoids	Isolona	Viridiplantae
C[C@]12C[C@H](c3ccoc3)OC(=O)[C@H]1C[C@@H](O)[C@@]13COC(=O)[C@@H]1C=CC=C23	2020	New modifications	Diterpenoids	Salvia	Viridiplantae
C=C[C@]1(C)CC[C@@H]2C(=CCC3[C@@](C)(CO)CCC[C@@]32C)C1	2020	New modifications	Diterpenoids	Setaria	Viridiplantae
C=C1[C@H]2C[C@H](OC(C)=O)[C@@]3(COC(=O)C(OC(=O)CC(C)C)C(C)C)O[C@@H]1O[C@@H](OC)[C@@H]23	2020	New modifications	Monoterpenoids	Valeriana	Viridiplantae
CO[C@@H]1C[C@@]2([C@H](C)O)CCCN3CCc4c(n1c1ccccc41)[C@H]32	2020	New skeletons	Diterpenoids	Kopsia	Viridiplantae
C[C@@H]1/C=C/[C@H](C(C)(C)O)CC/C(CO)=C/CC1	2020	New modifications	Sesquiterpenoids	Conocephalum	Viridiplantae
CCCCCC=CCC=CCCCCCCCC(=O)OC[C@@]1(O)C[C@@]23CC[C@@H]4C5=CC(=O)NC5=C[C@@H](O)[C@@]4(C)[C@@H]2CC[C@@H]1C3	2020	New modifications	Diterpenoids	Coffea	Viridiplantae
C[C@@H]1C2C3=CCC4[C@@]5(C)C[C@@H](O)[C@H](O[C@@H]6O[C@@H](C)[C@H](O)[C@@H](O)[C@H]6O)C(C)(C)C5CC[C@@]4(C)[C@]3(C)CC[C@@]2(C(=O)O)CC[C@H]1C	2020	New modifications	Triterpenoids	Syzygium	Viridiplantae
CC1=C2C[C@@](C)(CO)C[C@H]2[C@H](O)[C@]2(C)CC[C@]12O	2020	Site combinations	Sesquiterpenoids	Pholiota	Fungi
CCC(O)(CC)[C@H]1CC[C@@H]([C@]23CC(O)C4c5ccc(C)c(CCC(=O)C(C)C)c5C=CC42C3)[C@@H]1O	2020	New skeletons	Triterpenoids	Inonotus	Fungi
C/C1=C\CC(C)(C)/C=C/C[C@@]2(C)OC3=C(C(=O)C(C)(C)C(=O)C3(C)C)[C@H](CC(C)C)[C@@H]2CC1	2020	New modifications	Meroterpenoids	Rhodomyrtus	Viridiplantae
CC(=O)OCC1=C2CC(C)(C)C[C@H]2[C@@H](C)C[C@H](O)[C@@H]1CO	2020	New modifications	Sesquiterpenoids	Irpex	Fungi
CC1=C[C@H]2[C@H](C(C)C)[C@H]3C[C@@H](C)[C@]2(CC1)O3	2020	New modifications	Sesquiterpenoids	Isolona	Viridiplantae
C=CC(C)(O)CC/C=C(/C)C(=O)O[C@@H]1C[C@]2(C(=O)OC3OC(CO)C(O)C(O)C3O)CC[C@]3(C)C(=CC[C@@H]4[C@@]5(C)CC[C@@H](OC6OCC(O)C(OC7OC(CO)C(O)C(O)C7OC7OC(CO)C(O)C(O)C7O)C6OC6OC(C)C(O)C(O)C6O)C(C)(C)[C@@H]5CC[C@]43C)[C@@H]2CC1(C)C	2020	New modifications	Triterpenoids	Elaeagnus	Viridiplantae
COC(=O)C1=C[C@@H]2[C@@H](C(C)C)CC[C@H](CO)[C@@H]2OC1	2020	New sites	Sesquiterpenoids	Trichoderma	Fungi
C[C@]12CCO[C@@H](C1)C1=C(C2)[C@H](O)C[C@@H]2[C@]1(C)CCC[C@@]2(C)O	2020	Site combinations	Diterpenoids	Xylaria	Fungi
CC(=O)O[C@H]1C2=CC(=O)[C@](O)(C2)C(C)(C)/C=C/[C@H](C)C(=O)[C@@]2(O)C[C@H](C)[C@H](OC(=O)c3ccccc3)[C@H]12	2020	New sites	Diterpenoids	Euphorbia	Viridiplantae
C[C@]12CC[C@H](O)[C@](C)(O)[C@@H]1C[C@H]([C@@](C)(O)CO)CC2	2020	Site combinations	Sesquiterpenoids	Datura	Viridiplantae
COC(=O)CC[C@]12C[C@]13CC[C@]1(C)[C@@H]([C@H](C)CC(=O)C[C@H](C)C(=O)OC)CC[C@@]1(C)[C@@H]3CC[C@H]2C(C)(C)O	2020	New modifications	Triterpenoids	Pseudolarix	Viridiplantae
CC(=O)OC[C@]1(C)[C@H]2CCC3=CC(=O)C[C@@H](C)[C@@]3(C)[C@H]21	2020	New modifications	Sesquiterpenoids	Undefined	Others
CC1(C)[C@@H](O)CC[C@]2(C)[C@H](COc3ccc4ccc(=O)oc4c3)C(CO)=CC[C@@H]12	2020	New modifications	Sesquiterpenoids	Ferula	Viridiplantae
CO[C@@H](CC(=O)[C@](C)(O)[C@H]1[C@H](O)C[C@@]2(C)[C@@H]3CC=C4[C@@H](C[C@H](O)C(=O)C4(C)C)[C@]3(C)C(=O)C[C@]12C)C(C)(C)O	2020	New modifications	Triterpenoids	Dendrobium	Viridiplantae
CC(=O)O[C@@H]1[C@@H](C)C(=O)[C@@]23C[C@H](C)[C@H](OC(C)=O)[C@]2(/C=C(\C)[C@@H](OC(C)=O)[C@@H](O)[C@H]2[C@@H]1C2(C)C)O3	2020	New modifications	Diterpenoids	Euphorbia	Viridiplantae
CC(=O)O[C@@H]1C[C@@H](O)/C(C)=C\CC/C(C)=C\C[C@]2(C(C)C)CC[C@@]1(C)O2	2020	New modifications	Diterpenoids	Boswellia	Viridiplantae
C=C(C)C1CC[C@]2(C)C[CH][C@]3(C)C(CCC4[C@@]5(C)CC[C@@H](O)C(C)(C)C5CC[C@]43C)C12	2020	New modifications	Triterpenoids	Globimetula	Viridiplantae
CC(C)(O)CCC[C@@](C)(O)c1ccc(C(=O)O)cc1	2020	New modifications	Sesquiterpenoids	Aspergillus	Fungi
C=C1CC[C@H](Br)[C@]2(C)CC[C@H](/C(C)=C/C=C/C(C)(C)O)C[C@@]12O	2020	New modifications	Diterpenoids	Laurencia	Others
C=C1[C@@H]2CC[C@@H]3[C@@](C2)([C@@H]1OC(C)=O)[C@]1(O)OC[C@]32CCCC(C)(C)[C@H]2[C@@H]1OC(C)=O	2020	New sites	Diterpenoids	Isodon	Viridiplantae
CC1(C)C[C@H](O)[C@]2(C(=O)O)CC[C@]3(C)C(=CC[C@@H]4[C@@]5(C)CC[C@H](O[C@@H]6O[C@H](O[C]O)[C@@H](O)C(OC[C@@H]7OC[C@H](O)[C@H](O)[C@H]7O)[C@H]6O)C(C)(C)[C@@H]5CC[C@]43C)[C@@H]2C1	2020	Site combinations	Triterpenoids	Silene	Viridiplantae
CO[C@@H]1/C=C(\C)C[C@H](OC(C)=O)[C@]23OC(O)[C@H]([C@H]1n1cnc4c(N)ncnc41)[C@H]2CC3(C)C	2020	New modifications	Sesquiterpenoids	Pestalotiopsis	Fungi
COC(=O)CCc1c[n+]2c(c3[nH]c4ccccc4c13)C[C@@H]1C(C(=O)OC)=CO[C@@H](C)[C@@H]1C2	2020	New skeletons	Meroterpenoids	Picralima	Viridiplantae
CC1(C)CCC=C([C@@H]2CC=C(C(=O)O)CC2)[C@H]1O	2020	New modifications	Sesquiterpenoids	Zea	Viridiplantae
C[C@@]12CCC[C@@](C)(CO)C1CCC(CO)[C@H]2CCC1=CCOC1=O	2020	New modifications	Diterpenoids	Andrographis	Viridiplantae
CC(=O)O[C@H]1CC/C(C)=C/CC[C@@](C)(O)/C=C/[C@]2(C(C)C)CC[C@@]1(C)O2	2020	New modifications	Diterpenoids	Boswellia	Viridiplantae
CC1=C[C@H](O[C@@H]2O[C@H](CO)[C@@H](O)[C@H](O)[C@H]2O)[C@@H](O)[C@@]2(C)[C@H]1C[C@H]1OC(=O)C[C@H]3[C@@H](C)C(=O)[C@]4(O)OC[C@@]31[C@@H]24	2020	New modifications	Triterpenoids	Ailanthus	Viridiplantae
C[C@@H]1C2=C(CC[C@@]13C=C[C@@H](O)C1=C3COC1=O)C(=O)O[C@@H]2c1ccoc1	2020	New sites	Diterpenoids	Salvia	Viridiplantae
C[C@]12CC[C@H]3C(=CC[C@H]4[C@](C)(O)CCC[C@]34C)[C@@H]1OC[C@H]2O	2020	Site combinations	Diterpenoids	Xylaria	Fungi
C=C1[C@@H](OC(C)=O)C2C3CCC(=O)C(C)(C)[C@H]3C(=O)[C@]3(O)OC4=C(C)OC(=O)[C@@]1(C)[C@]4(C(=O)OC)[C@]23C	2020	New skeletons	others	Aspergillus	Fungi
C=C(C(=O)OCC)[C@@H]1[C@@H](OC(=O)CC(C)C)C[C@]2(C)[C@H](C(C)=CC[C@H]2O)[C@H]1O	2020	New modifications	Sesquiterpenoids	Artemisia	Viridiplantae
C=C1C[C@@]23CC[C@@H]4[C@](C)(C(=O)O)[C@@H](OC(=O)/C(C)=C\C)CC[C@@]4(C)[C@@H]2CC[C@H]1C3	2020	New modifications	Diterpenoids	Mikania	Viridiplantae
C=C[C@]1(C)CC[C@H]2C(=CC[C@H]3[C@](C)(O)CCC[C@]23C)[C@@H]1O	2020	Site combinations	Diterpenoids	Callicarpa	Viridiplantae
C=C(CCC=C(C)C)[C@]1(O)CC[C@@](C)(Cl)[C@H](Br)C1	2020	New modifications	Sesquiterpenoids	Laurencia	Others
CC(C)=CCC[C@@H](C)[C@H]1CC[C@]23C(=O)O[C@@]4(CC[C@]12C)[C@@]1(C)CC[C@H](O)C(C)(C)C1C[C@@H]1O[C@@]143	2020	New modifications	Triterpenoids	Penares	Metazoa
COC(=O)C1=CCCC2=C1[C@@H](OC=O)C[C@@H](C)[C@]21C[C@@H](c2ccoc2)OC1=O	2020	New modifications	Diterpenoids	Croton	Viridiplantae
CC(=O)C12CC/C=C\C(=O)O[C@@H]3C[C@H]4O[C@@H]5[C@H]6C[C@@]4(O)[C@@]3(C)[C@]5(CC=C6C)COC(=O)/C=C(\CCO1)[C@H]2O	2020	New modifications	Sesquiterpenoids	Paramyrothecium	Fungi
COC(C)(CC(=O)O)CC(=O)OC[C@H]1O[C@@H](O[C@H]2CC[C@@H]3C(=CCC4[C@]5(C)CC[C@@H](C(C)CC/C=C(\C)CO)[C@@]5(C)CC(=O)[C@]43C)C2(C)C)[C@H](O)[C@@H](O)[C@@H]1O	2020	New modifications	Triterpenoids	Hemsleya	Viridiplantae
C=C1CCC[C@]2(C)Cc3oc(Cc4ccc(C(c5oc6c(c5C)C[C@H]5C(=C)CCC[C@]5(C)C6)c5oc6c(c5C)C[C@H]5C(=C)CCC[C@]5(C)C6)o4)c(C)c3C[C@@H]12	2020	New skeletons	others	Atractylodes	Viridiplantae
CN1C[C@H]2C(=O)[C@@]34[C@@H](CC[C@@H]2[C@H]3O1)[C@]12CCCC(C)(C)[C@H]1[C@H](O)[C@@]4(C)OC2	2020	New skeletons	Diterpenoids	Streblus	Viridiplantae
C/C(=C\CC/C(C)=C/CC[C@]1(C)C=Cc2c(O)cc(C)cc2O1)CO	2020	New sites	Meroterpenoids	Rhododendron	Viridiplantae
C=CC(C)(O)CCC(O)C(C)(O)CC(O)C(O)C(C)(C)O	2020	Site combinations	Sesquiterpenoids	Solanum	Viridiplantae
C/C=C(/C)C(=O)O[C@H]1CC[C@]2(C)C[C@]3(O)OC(=O)C(C)=C3C[C@H]2[C@]1(C)OC(C)=O	2020	New modifications	Sesquiterpenoids	Olea	Viridiplantae
CC(C)[C@H]1CC[C@](C)(O)[C@@H]2CC[C@](C)(O)[C@@H]2C1	2020	New modifications	Sesquiterpenoids	Curcuma	Viridiplantae
CC(=O)O[C@@H]1C[C@@]2(C)C3CCC4=C(C)C(=O)[C@@H](O)CC4[C@]3(C)C(=O)C[C@]2(C)[C@H]1[C@@](C)(O)C(=O)/C=C/C(C)(C)O	2020	New modifications	Triterpenoids	Mareya	Viridiplantae
CC(C)[C@@H]1CC[C@]2(C)[C@H]1[C@@H]1O[C@@]2(O)CC[C@@]1(O)CO	2020	New modifications	Sesquiterpenoids	Echinacea	Viridiplantae
C=C(C)C1CC[C@]2(C)C[C@@H](O)[C@]3(C)C(CCC4[C@@]5(C)CC[C@@H](OC(=O)CCCCCCCCCCCCCCCCCCCCC)C(C)(C)C5CC[C@]43C)C12	2020	New modifications	Triterpenoids	Globimetula	Viridiplantae
C=C(C)[C@H]1C/C=C(\C)C[C@H](O)/C=C(\CO)CC/C=C(\C)CC1	2020	New modifications	Diterpenoids	Boswellia	Viridiplantae
C[C@H]1[C@H]2CC[C@@]34C=C[C@@](C)(CC[C@H]3[C@]23CC[C@@]1(O)OC3)C4	2020	New sites	Diterpenoids	Euphorbia	Viridiplantae
C[C@@H]1[C@@H]2CC[C@@]3(C)CC4=CC(=O)[C@H]5C(C)(C)[C@H](O)[C@H](O)C[C@]5(C)[C@H]4CC[C@@H]3[C@@]2(C)CC[C@H]1O	2020	New modifications	Triterpenoids	Diphasiastrum	Viridiplantae
COC[C@@H]1C(=O)[C@@]23[C@@H](CC[C@@H]1[C@H]2O)C12CCCC(C)(C)[C@H]1C(=O)[C@]3(O)[C@@H]2O	2020	Site combinations	Diterpenoids	Isodon	Viridiplantae
COC(=O)/C=C(/C)CC/C=C(\C)CC/C=C(\C)CC[C@H](O)C(C)(C)O	2020	New modifications	Diterpenoids	Aphanamixis	Viridiplantae
CC1=C2CC[C@H](C)[C@@H]2C[C@@H]2[C@](O)(CO)CO[C@]12CO	2020	New skeletons	Sesquiterpenoids	Daphne	Viridiplantae
C[C@@]12CC[C@H]3[C@@](C)(CO)[C@H](O)[C@H](O)C[C@]3(C)[C@H]1CC[C@H]1C(=CC(=O)[C@@H]3[C@@](C)(CO)[C@H](O)CC[C@@]31C)C2	2020	New sites	Triterpenoids	Diphasiastrum	Viridiplantae
C=C1CCC[C@@H]2[C@]1(C)CC[C@H](C)[C@@]2(C)CC1=CC(=O)NC1=O	2020	New modifications	Diterpenoids	Dysidea	Metazoa
C=C[C@@]1(C)C=C2CC[C@H]3[C@@](C)(CC[C@@H](O)[C@]3(C)O)[C@@H]2CC1	2020	New modifications	Diterpenoids	Euphorbia	Viridiplantae
C=C(CC[C@H](C(=O)O)[C@H]1C[CH][C@@]2(C)C3=CC[C@H]4C(C)(C)[C@H](O)CC[C@]4(C)C3=CC[C@]12C)C(C)C	2020	New modifications	Triterpenoids	Taiwanofungus	Fungi
CC(=O)O[C@@H]1C/C=C(/C)[C@@H]2O[C@@H]2C[C@]2(C)O[C@@H]2C[C@]2(C(C)C)CC[C@@]1(C)O2	2020	Site combinations	Diterpenoids	Boswellia	Viridiplantae
Cc1coc2c1C(=O)[C@@H]1[C@](C)(O)CC[C@@H](O)[C@]1(C)C2	2020	New modifications	Sesquiterpenoids	Curcuma	Viridiplantae
CC(=O)O[C@@H]1CCC(C)(C)c2ccc3c(c21)C(=O)C(=O)C1=C3OC[C@@H]1C	2020	New modifications	Diterpenoids	Salvia	Viridiplantae
CC(=O)OCC1=C[C@H]2O[C@@H]3C[C@@H](OC(C)=O)[C@@](C)([C@]34CO4)[C@@]2(C)CC1	2020	New modifications	Sesquiterpenoids	Trichoderma	Fungi
CO[C@@H]1OC(=O)C=C1CC[C@@]1(C)C2=CCC[C@@](C)(CCCC(C)(C)OC)[C@@H]2CC[C@H]1C	2020	New sites	Sesterterpenoids	Dactylospongia	Metazoa
COC(=O)C1=CC(=O)C[C@@H]2[C@@](C)(CCC3=CCOC3=O)[C@H](C)C[C@H](O)[C@@]12C	2020	New modifications	Diterpenoids	Callicarpa	Viridiplantae
C=C([C@@H]1CC=C(C)C(=O)O1)[C@@H]1CC[C@]2(C)[C@@H]1CC[C@@H]1[C@@]34CO[C@](O)(C[C@H]3O)C(C)(C)[C@@H]4CC[C@]12C	2020	Site combinations	Triterpenoids	Rhus	Viridiplantae
COc1cc(C(=O)O[C@@H]2CC(C)=C[C@@H](O)[C@@]3(C)CC[C@@](O)(C(C)C)[C@H]23)ccc1O	2020	New modifications	Sesquiterpenoids	Ferula	Viridiplantae
C=C(C)[C@@]12OC3(/C=C\C=C/CCCCC)O[C@H]1[C@@H]1[C@H]4OC4(CO)[C@H](O)[C@]4(O)C(=O)C(C)=C[C@H]4[C@@]1(O3)[C@@H](C)[C@@H]2OC(C)=O	2020	New modifications	Diterpenoids	Daphne	Viridiplantae
C=Cc1c(C)c(O)c2c3c(c(C)ccc13)C[C@@H](O)[C@]2(O)C(C)C	2020	New skeletons	Others	Flueggea	Viridiplantae
COC(=O)C1=C[C@]23OC[C@@H](C)[C@H]2CC[C@H](C)[C@@H]3[C@@H](O)C1	2020	New sites	Sesquiterpenoids	Trichoderma	Fungi
CC1=C2C=C3CC[C@@H]4C(C)(C)CCC(=O)[C@@]4(C)[C@@H]3CC2OC1=O	2020	New sites	Diterpenoids	Euphorbia	Viridiplantae
CC(C)C(=O)C1=C(O)C(C)(C)C(=O)C2=C1O[C@@]1(C)CC[C@H](O)C(C)(C)[C@@H]1C2	2020	New skeletons	Others	Hypericum	Viridiplantae
CO[C@@]12C[C@H]3[C@H]([C@H](C)C1=CC(=O)O2)[C@H](O)[C@H](OC(=O)c1ccccc1)[C@@]1(O)C(C)(C)[CH]CC[C@]31C	2020	New modifications	Diterpenoids	Caesalpinia	Viridiplantae
C/C=C/C(=O)O[C@@H]1CO[C@@H](O[C@H]2CC[C@]34C[C@]35CC[C@]3(C)[C@@H]([C@@]6(C)CC[C@@H](C(C)(C)O)O6)[C@@H](O)C[C@@]3(C)[C@@H]5C[C@H](O[C@@H]3O[C@H](CO)[C@@H](O)[C@H](O)[C@H]3O)[C@H]4C2(C)C)[C@H](OC(C)=O)[C@H]1OC(C)=O	2020	New modifications	Triterpenoids	Astragalus	Viridiplantae
C=C1C=C2O[C@@]3(Br)C=C[C@@]4(C)O[C@@H]1C[C@]24C3(C)C	2020	New modifications	Sesquiterpenoids	Laurencia	Others
C=C(CC[C@@H](C(=O)O)[C@H]1C(=O)C[C@@]2(C)C3=CC[C@H]4C(C)(C)C(=O)CC[C@]4(C)C3=CC[C@]12C)C(C)C	2020	New modifications	Triterpenoids	Chisocheton	Viridiplantae
CC(C)(O)/C=C/C[C@]1(C)CC[C@]2(C)C3=C(CC[C@@]2(C)C1)[C@@]1(C)CC[C@H](O)C(C)(C)[C@@H]1CC3	2020	New sites	Triterpenoids	Eclipta	Viridiplantae
C=C([C@H]1OC(=O)C(C)=C[C@@H]1O)[C@@H]1CC[C@]2(C)[C@@H]1CC[C@@H]1[C@]34CC[C@@](O)(OC3)C(C)(C)[C@@H]4CC[C@]12C	2020	Site combinations	Triterpenoids	Rhus	Viridiplantae
C=C1[C@@H]2CC[C@H]3[C@@]45CO[C@](O)([C@@H](O)[C@@H]4C(C)(C)CC[C@@H]5OC(C)=O)[C@@]3([C@@H]1OC(C)=O)[C@@H]2O	2020	New sites	Diterpenoids	Isodon	Viridiplantae
C=C1CC[C@H]2[C@@](O)(C(=O)O[C@@H]3O[C@H](CO)[C@@H](O)[C@H](O)[C@H]3O)CCC[C@]2(C)[C@H]1CCC1=CCOC1=O	2020	Site combinations	Diterpenoids	Pinus	Viridiplantae
CC1=C2CC[C@]3(C)O[C@H]3C[C@@H](OO)/C(C)=C/CC/C(C)=C/[C@@H]2OC1=O	2020	Site combinations	Diterpenoids	Sarcophyton	Metazoa
CC(=O)O[C@H]1C[C@H](O)/C(C)=C/CC/C(C)=C/C[C@]2(C(C)C)CC[C@@]1(C)O2	2020	New modifications	Diterpenoids	Boswellia	Viridiplantae
C/C1=C\CC[C@@](C)(O)/C=C/[C@](O)(C(C)C)CC/C(C)=C/CC1	2020	New modifications	Diterpenoids	Sarcophyton	Metazoa
CC(C)C[C@H]1c2c(O)c(C=O)c(O)c(C=O)c2O[C@]2(C)C=C[C@](O)(C(C)C)C[C@H]12	2020	New sites	Others	Eucalyptus	Viridiplantae
C[C@]1(CCO)CC=C2C(=CC[C@@H]3[C@]2(C)CCC[C@@]3(C)O)C1	2020	New modifications	Diterpenoids	Xylaria	Fungi
C=C(C)[C@H]1CC[C@](C)(O)[C@H]2CC[C@](C)(O)[C@H]2C1	2020	New modifications	Sesquiterpenoids	Schisandra	Viridiplantae
CC(=O)OC[C@@]1(O)CC[C@H]2O[C@@]2(C)CC[C@@H]2[C@@H]1CC2(C)C	2020	New modifications	Sesquiterpenoids	Evolvulus	Viridiplantae
CC(C)[C@@H]1[C@@H](O)C[C@@H](C)[C@@]12CC=C(CO)C(=O)C2	2020	New modifications	Sesquiterpenoids	Daphne	Viridiplantae
C=C(C)[C@@]12C[C@@H]3[C@@](C)(CC=C[C@]3(CO)O1)C[C@H]2O	2020	Site combinations	Sesquiterpenoids	Dictyosporium	Fungi
C[C@@H]1c2ccoc2C[C@H]2[C@H]1[CH][C@H](OC(=O)c1ccccc1)[C@]1(O)[C@]2(C)CC[C@@H](OC(=O)c2ccccc2)[C@@]1(C)C(=O)O	2020	Site combinations	Diterpenoids	Caesalpinia	Viridiplantae
C[C@H]1[C@H](C)CC[C@]2(C)CC[C@]34C[C@]3(C(=O)[C@@H](O)[C@@H]3[C@@]5(C)CC[C@H](O)[C@@](C)(C(=O)O)[C@@H]5CC[C@]34C)[C@H]12	2020	New sites	Triterpenoids	Stewartia	Viridiplantae
C[C@@H](CC(=O)C[C@](C)(O)C1=C[C@@H](O)[C@@]2(C)[C@]34O[C@H]3C[C@H]3C(C)(C)C(=O)CC[C@]3(C)C4=CC(=O)[C@]12C)C(=O)O	2020	New modifications	Triterpenoids	Ganoderma	Fungi
CC(=O)[C@H]1CCC2[C@]3(C)CCC4C(C)(C)[C@H](O)CC[C@]4(C)C3CC[C@]2(C)C1	2020	New sites	Sesterterpenoids	Diplodia	Fungi
C[C@H]1[C@H](C)CC[C@]2(C)CC=C3[C@@](C)(C(=O)[C@@H](O)[C@@H]4[C@@]5(C)CC[C@H](O)[C@@](C)(C(=O)O)[C@@H]5CC[C@@]34C)[C@H]12	2020	New sites	Triterpenoids	Stewartia	Viridiplantae
C=C[C@]1(C)C=C2C(=O)C[C@H]3C(C)(C)CCC[C@]3(C)C2[C@@H](O)C1	2020	New modifications	Diterpenoids	Salacia	Metazoa
CC(C)=C/C=C/[C@@]1(C)CCC[C@@]2(C)Oc3cc(C)cc(O)c3C[C@H]12	2020	New skeletons	Meroterpenoids	Rhododendron	Viridiplantae
CC1O[C@@H](O[C@H]2C(O)[C@@H](O)CO[C@H]2O[C@H]2CC[C@@]3(C)C(CC[C@]4(C)C3CC=C3[C@@H]5CC(C)(C)CC[C@]5(C(=O)O[C@@H]5OC(CO[C@@H]6OC(CO)[C@@H](O)C(O)[C@@H]6O)[C@@H](O)C(O)[C@@H]5O)CC[C@]34C)C2(C)C)C(O)[C@@H](O[C@@H]2OC[C@@H](O)C(O[C@@H]3OC(C)C(OC4OC(CO)C(O)[C@@H](O[C@@H]5OC(C)C(O)[C@H](O)[C@@H]5O)[C@@H]4O)[C@H](O)[C@@H]3O)[C@@H]2O)C1O	2020	New modifications	Triterpenoids	Scabiosa	Viridiplantae
C=C1[C@@H](OC)O[C@@H](OC)[C@H]2[C@@H]1C[C@@H](OC(C)=O)[C@]2(O)CCl	2020	New modifications	Monoterpenoids	Valeriana	Viridiplantae
CO[C@H]1c2cc(C(C)C)c(O)c(O)c2[C@@]23CCC[C@](C)(COC(C)=O)C2[C@@H]1OC3=O	2020	New sites	Diterpenoids	Salvia	Viridiplantae
C=C1CC[C@@H](O)[C@]2(C)CC[C@@H]3[C@@H](C)CC[C@H](C(C)(C)O)[C@@H]3[C@@H]12	2020	Site combinations	Diterpenoids	Plagiochila	Viridiplantae
C=C[C@]1(C)C=C2[C@@H](O)C[C@H]3[C@@](C)(COC=O)CCC[C@]3(C)[C@H]2CC1	2020	New modifications	Diterpenoids	Callicarpa	Viridiplantae
C/C(=C\CC[C@@]1(C)[C@H]2CCC[C@@]3(C)Oc4cc(C)cc(O)c4[C@@H]1[C@@H]23)CO	2020	New skeletons	Meroterpenoids	Rhododendron	Viridiplantae
C=C(CO)C(=O)O[C@H]1C/C(CO)=C\CC/C(C)=C/[C@H]2OC(=O)C(=C)[C@H]12	2020	New modifications	Sesquiterpenoids	Dimerostemma	Viridiplantae
CC(=O)[C@@H]1CC[C@H]2[C@H]1CCC[C@@]2(C)O	2020	New skeletons	Others	Populus	Viridiplantae
C=C1C2[C@H](O)[C@H](OC(=O)/C=C/c3ccc(O)c(O)c3)[C@]3(C)C(CCC4C5CC[C@@H](C(=C)C)[C@@]5(C)CC[C@]43C)[C@@]2(C)CC[C@@H]1O	2020	New modifications	Others	Fagaropsis	Viridiplantae
CC(=O)O[C@@H]1C[C@H]2C3=C(C(=O)C[C@@H]2[C@@]2(C)CCCC(C)(C)[C@H]12)[C@H]1C(=O)O[C@@]24C[C@H]5[C@@H](CC[C@H]6C(C)(C)CCC[C@]56C)[C@@]5(C)O[C@]5([C@H]1C3)[C@H]2O4	2020	New skeletons	Others	Pterolobium	Viridiplantae
COC(=O)C(C)CCCC(C)(O)CCc1c(C)c(O)c(C)c(C)c1O	2020	New modifications	Meroterpenoids	Sarcophyton	Viridiplantae
C=C[C@@]1(C)CCC2=C(C1)C(=O)C[C@H]1C(C)(C)CC[C@H](O)[C@]21C	2020	New modifications	Diterpenoids	Salacia	Metazoa
CO[C@]12C=C(C)C[C@H](OC(C)=O)[C@]3(O1)[C@H](CC3(C)C)C(CO)=C2	2020	New modifications	Sesquiterpenoids	Pestalotiopsis	Fungi
CCCCCCCCCCCCCC(=O)O[C@@]12C[C@@H](C)[C@@]3(O)[C@@H](C(=O)C(CO)=C[C@]4(O)C(=O)C(C)=C[C@@H]34)[C@@H]1C2(C)C	2020	New modifications	Diterpenoids	Reutealis	Viridiplantae
CC1(C)[C@@H]2CC[C@@H](C2)[C@H]1OC(=O)c1ccc(O)cc1	2020	New modifications	Monoterpenoids	Ferula	Viridiplantae
C[C@@H]1C2=C(CC[C@@]13CCC=C1C(=O)OC[C@H]13)C(=O)O[C@@H]2c1ccoc1	2020	New modifications	Diterpenoids	Salvia	Viridiplantae
COC(=O)CC[C@]12C[C@]13CC[C@]1(C)[C@@H]([C@@H](C)[C@H]4CC=C(C)C(=O)O4)CC[C@@]1(C)[C@@H]3C[C@H](O)[C@H]2C(C)(C)O	2020	New modifications	Triterpenoids	Kadsura	Viridiplantae
C=C1CC23CC4C5[C@]67C[C@H](OC(=O)C(C)C)C[C@@]5(C)CN4C6[C@]2(O)[C@H](O)C1[C@H](OC(C)=O)C37	2020	New modifications	Diterpenoids	Aconitum	Viridiplantae
CC1=C2C(=O)OC[C@@H](C(=O)OC3=C(O)[C@H](O)[C@@H](CO)O[C@H]3O[C@@H]3OC=C[C@]4(O)[C@H]3[C@@]3(C)O[C@H]3[C@H]4O)[C@H]2CC1	2020	New modifications	Monoterpenoids	Linaria	Metazoa
CC1=C/C(=C2\[C@H](C)CC[C@@H]2[C@H](C)CO)OC1=O	2020	New skeletons	Others	Rhodotus	Fungi
C[C@@]12CC[C@@H](O)[C@](C)(CO)[C@H]1CCC1=C[C@@](C)([C@@H](O)CO)CC[C@H]12	2020	New modifications	Diterpenoids	Sigesbeckia	Viridiplantae
COC(=O)CCC(=O)[C@H]1CC[C@]2(C)[C@@H]1CC[C@@H]1[C@@]3(C)CC[C@H](OC(C)=O)C(C)(C)[C@@H]3CC[C@]12C	2020	New skeletons	Triterpenoids	Artemisia	Viridiplantae
C/C(=C\[C@H](C)/C(C)=C/C(=O)O)C(=O)O	2020	New sites	Monoterpenoids	Aspergillus	Fungi
C=CC(=C)[C@@H](C[C@@]1(C)[C@H](C)[C@H](O)C[C@@]2(C)C(C)=CC(=O)C[C@@H]21)OO	2020	New modifications	Diterpenoids	Stachys	Viridiplantae
CC(=O)[C@H](C)[C@H]1C[C@]2(C=C3[C@H](O)CC4[C@@]5(C)CC[C@H](O[C@@H]6OC[C@H](O)[C@H](O)[C@H]6O[C@@H]6O[C@H](CO)[C@@H](O)[C@H](O)[C@H]6O)C(C)(C)C5CC[C@@]4(C)[C@]3(C)CC2)C(=O)O1	2020	New modifications	Triterpenoids	Ilex	Viridiplantae
COC(=O)[C@H](/C=C\C=C(C)C)[C@@H]1[C@@H](O)C[C@]2(C)C3=CC[C@H]4[C@](C)(C(=O)OC)[C@H](O)CC[C@]4(C)[C@H]3CC[C@@]12C	2020	New modifications	Triterpenoids	Lantana	Viridiplantae
CC1O[C@@H](O[C@H]2C(O)[C@H](O)CO[C@H]2O[C@H]2CC[C@@]3(C)C(CC[C@]4(C)C3CC=C3[C@@H]5CC(C)(C)CC[C@]5(C(=O)O[C@@H]5OC(CO[C@@H]6OC(CO)[C@@H](O)C(O)[C@@H]6O)[C@@H](O)C(O)[C@@H]5O)CC[C@]34C)C2(C)C)C(O)[C@@H](O[C@@H]2OC[C@@H](O)C(O[C@@H]3OC(C)[C@H](OC4OC(CO)C(OC5OC(CO)C(O)[C@H](O)[C@@H]5O)[C@@H](O[C@@H]5OC(C)C(O)[C@H](O)[C@@H]5O)[C@@H]4O)[C@H](O)C3O)[C@@H]2O)C1O	2020	New modifications	Triterpenoids	Scabiosa	Viridiplantae
CC(=O)[C@@H]1[C@@H](O)C[C@@H]2[C@](C)(C(=O)C[C@H]3[C@@]2(C)CC[C@H]2C(C)(C)CCC[C@@]23CO)[C@H]1C(=O)O	2020	New modifications	Sesterterpenoids	Lendenfeldia	Metazoa
CC1=C2[C@@H](O)C3=C(C[C@H]2OC1=O)[C@]1(C)CCC(=O)C(C)(C)[C@H]1CC3	2020	New sites	Diterpenoids	Euphorbia	Viridiplantae
C=C1CC[C@H]2[C@@](C)(CC[C@@H](O)[C@@]2(C)CO)[C@@H]1C/C=C1\C(=O)OC[C@H]1O	2020	New modifications	Diterpenoids	Andrographis	Viridiplantae
CC1(C)C[C@H]2[C@H]1CCC(=O)C[C@]2(C)CCC(=O)O	2020	New skeletons	Sesquiterpenoids	Rumphella	Metazoa
CC(=O)OC[C@]1(C)[C@H](OC(C)=O)CC[C@]2(C)[C@H]3[C@H](O)c4c(cc(-c5cccnc5)oc4=O)O[C@]3(C)[C@H](OC(C)=O)C[C@H]21	2020	New modifications	Meroterpenoids	Aspergillus	Fungi
C[C@H](CC(=O)[C@@H]1OC1(C)C)[C@H]1C(=O)C[C@@]2(C)C3=CC[C@H]4C(C)(C)[C@@H](O[C@@H]5OC[C@@H](O)[C@H](OC[C@@H]6OC[C@@H](O)[C@H](O)[C@H]6O)[C@H]5OOC(=O)CC(=O)O)CC[C@@]45C[C@@]35[C@@H](O)C[C@]12C	2020	New modifications	Triterpenoids	Actaea	Viridiplantae
C/C1=C/C/C=C(\C)CC[C@@H](O)[C@@]2(C)CC[C@@](C(C)C)(C[C@H]1O)O2	2020	New modifications	Diterpenoids	Boswellia	Viridiplantae
C=C(C)[C@@]12OC3(c4ccccc4)O[C@@H]1[C@@H]1[C@@H]4O[C@]4(CO)[C@@H](O)[C@]4(O)C(=O)C(C)=C[C@H]4[C@@]1(O3)[C@H](C)[C@H]2OC(=O)C(C)C	2020	New modifications	Diterpenoids	Daphne	Viridiplantae
CC(C)=C1C[C@@]23O[C@]1(O)C[C@@](C)(O)[C@H]2CC[C@@H]3C	2020	New modifications	Sesquiterpenoids	Curcuma	Viridiplantae
C/C=C(/C)C(=O)O[C@H]1C(C)=C[C@]23C(=O)[C@@H](C=C(C)[C@@H](OC(C)=O)[C@]12O)[C@H]1[C@@H](C[C@H]3C)[C@@]1(C)COC(=O)/C(C)=C/C	2020	New modifications	Diterpenoids	Euphorbia	Viridiplantae
COC(=O)[C@H](C)c1c([C@@]2(C)CCCC(C)(C)C2)ccc2c1[C@H](O)OC2=O	2020	New modifications	Diterpenoids	Dendrilla	Metazoa
C=CC1(C)CCC(=O)C(C)(C)O1	2020	New modifications	Monoterpenoids	Fomitopsis	Fungi
C/C1=C\C[C@]2(C(C)C)CC[C@@](C)(O2)[C@@H](O)CCC(C)(O)/C=C/C1	2020	New modifications	Diterpenoids	Boswellia	Viridiplantae
C=C1[C@H]2C[C@](C)(CO)[C@@H]2CC[C@@]2(CO)O[C@@H]2C[C@H]1O	2020	Site combinations	Sesquiterpenoids	Datura	Viridiplantae
C[C@@]12CC[C@H]3[C@@](C)(CO)[C@H](O)CC[C@]3(C)[C@H]1CC[C@H]1C(=CC(=O)[C@@H]3[C@@](C)(CO)[C@H](O)CC[C@@]31C)C2	2020	New modifications	Triterpenoids	Diphasiastrum	Viridiplantae
CC(=O)O[C@H]1CCC(C)(O)/C=C/C/C(C)=C/C[C@]2(C(C)C)CC[C@@]1(C)O2	2020	New modifications	Diterpenoids	Boswellia	Viridiplantae
C=C1C=C[C@@]2(C)C(=C1)CCC1C2CC[C@]2(C)/C(=C(\C)C(=O)CCC(C)C(=O)O)C(=O)C[C@@H]12	2020	New skeletons	Others	Dracaena	Metazoa
C[C@@H]1C(=O)O[C@@]2(C[C@@H](C)[C@H]3CC[C@@]4(C)C5=C(C[C@@H](O)[C@]34CO2)[C@@]2(C)CC[C@@H](OC(=O)CC(=O)O)C(C)(C)[C@@H]2CC5)[C@H]1C	2020	New modifications	Triterpenoids	Heritiera	Viridiplantae
CCCCCCCCCCCC(=O)O[C@@]12C[C@@H](C)[C@@]3(O)[C@@H](C=C(C=O)C[C@]4(O)C(=O)C(C)=C[C@H]43)[C@@H]1C2(C)C	2020	New modifications	Diterpenoids	Reutealis	Viridiplantae
C[C@@]12CCO[C@H]1C1=C[CH][C@H]3[C@@](C)(O)[C@H](O)CC[C@]3(C)[C@H]1CC2	2020	Site combinations	Diterpenoids	Xylaria	Fungi
CC1=C2C[C@H](C3(C)CO3)CC[C@H](C)[C@@H]2CC1=O	2020	New modifications	Sesquiterpenoids	Wikstroemia	Viridiplantae
C=C1CC[C@H](OC(C)=O)[C@]2(C)[C@@H](OC(C)=O)/C=C\C(CCl)=C/[C@@H]3OC(=O)[C@H](C)[C@@]3(O)[C@@H](OC(C)=O)[C@@H]12	2020	New modifications	Diterpenoids	Ellisella	Metazoa
CC1=C[C@]2(O[C@@H]3O[C@H](CO)[C@@H](O)[C@H](O)[C@H]3O)C[C@@H](CO)C(=O)[C@@H]2[C@](C)(O)C12CC2	2020	New sites	Sesquiterpenoids	Pteridium	Viridiplantae
COC(=O)C1=CO[C@@H](O[C@H]2O[C@@H](COC(C)=O)[C@H](O)[C@@H](O)[C@@H]2O)[C@@H]2[C@H]3CN4CCc5c([nH]c6ccccc56)[C@]4(C[C@H]12)O3	2020	New modifications	Meroterpenoids	Neolamarckia	Viridiplantae
CCCCCCCCCCCC(=O)O[C@@]12C[C@@H](C)[C@@]3(O)[C@@H](C(=O)C(CO)=C[C@]4(O)C(=O)C(C)=C[C@@H]34)[C@@H]1C2(C)C	2020	New modifications	Diterpenoids	Reutealis	Viridiplantae
C=C(C(=O)O)[C@@H]1[C@@H](O)C[C@@]2(C)C(=O)O[C@@H]1/C2=C(\C)C(C)=O	2020	New sites	Sesquiterpenoids	Artemisia	Viridiplantae
C=C1C(=O)[C@@]23[C@@H](CC[C@@H]1[C@H]2O)[C@@H]1CC[C@H](OC(C)=O)C(C)(C)[C@H]1C[C@H]3O	2020	Site combinations	Diterpenoids	Isodon	Viridiplantae
C=C(C)[C@@]1(O)[C@H](OC(=O)/C=C/C=C/CCCCC)[C@@H]2[C@H](O)[C@@](O)(CO)[C@@H](O)[C@]3(O)C(=O)C(C)=C[C@H]3[C@@]2(O)[C@H](C)[C@H]1OC(C)=O	2020	New modifications	Diterpenoids	Daphne	Viridiplantae
C[C@@]12CC[C@@H](O)[C@@]3(C)CC[C@@H]4C[C@H]5C[C@H]6[C@H](O[C@@H]7O[C@H](CO)[C@@H](O)[C@H](O)[C@@H]7O)[C@@]6(C)C[C@@H](O1)[C@H]5[C@]4(C)CC[C@@H]23	2020	New sites	Monoterpenoids	Hemiphragma	Viridiplantae
C[C@]1(O)C[C@]23CC[C@H]1C[C@@H]2[C@@]1(C)CCC[C@](C)(C(=O)O)[C@]1(O)CC3	2020	Site combinations	Diterpenoids	Talaromyces	Fungi
C=C1CC[C@H]2C(C)=CC(=O)C[C@]2(O)C1	2020	New sites	Sesquiterpenoids	Curcuma	Viridiplantae
C[C@@]1(C(=O)CO)C=C2CC[C@H]3[C@@](C)(CCC(=O)[C@@]3(C)CO)[C@@H]2CC1	2020	New modifications	Diterpenoids	Sigesbeckia	Viridiplantae
C=C1C(=O)O[C@@H]2/C=C(C)\C=C/C(=O)[C@](C)(O)[C@H](O)[C@@H](OC(=O)/C(=C\C)CO)[C@@H]12	2020	New modifications	Sesquiterpenoids	Campuloclinium	Viridiplantae
C[C@@H]1C[C@]23CC[C@H]([C@H]1O)[C@H]2[C@]1(C)CCC(=O)C(C)(C)[C@H]1CC3	2020	New skeletons	Diterpenoids	Excoecaria	Viridiplantae
CC1(C)CCC=C(c2ccc(O)cc2)[C@H]1O	2020	New sites	Others	Zea	Viridiplantae
CC(=O)O[C@H]1C[C@@]2(C)[C@H](c3ccoc3)C[C@H]3O[C@]32[C@]2(C)C(=O)C(O)=C3C(C)(C)C(=O)C[C@H](O)[C@]3(C)[C@@H]12	2020	New modifications	Triterpenoids	Toona	Viridiplantae
C[C@]12C[C@H](O)[C@@H](O)[C@@](C)(CO)[C@@H]1[CH]C[C@]1(C)[C@@H]2CC=C2[C@@H]3C[C@](C)(CO)CC[C@]3(C(=O)O)CC[C@]21C	2020	New modifications	Triterpenoids	Rhodomyrtus	Viridiplantae
C[C@H](CC(=O)C[C@@H](C)[C@H]1C[C@H](O)[C@@]2(C)C3=C(C(=O)C[C@]12C)[C@@]1(C)CCC(=O)C(C)(C)[C@@H]1C[C@@H]3O)C(=O)O	2020	New modifications	Triterpenoids	Ganoderma	Fungi
C[C@]12[C@@H]3C[C@@H](C[C@H]1O3)[C@@]2(C)CO	2020	Site combinations	Monoterpenoids	Aristolochia	Viridiplantae
C=C[C@@](C)(O)CC/C=C(\C)C(=O)O[C@H]1C[C@]2(C(=O)O)CC[C@]3(C)C(=CCC4[C@@]5(C)CC[C@H](O[C@H]6O[C@H](CO)[C@@H](O[C@@H]7OC[C@@H](O)[C@H](O)[C@H]7O)[C@H](O)[C@H]6O[C@@H]6OC[C@@H](O[C@H]7OC[C@@H](O)[C@H](O)[C@H]7O)[C@H](O[C@@H]7O[C@H](CO)[C@@H](O)[C@H](O)[C@H]7O[C@@H]7O[C@H](CO)[C@@H](O)[C@H](O)[C@H]7O)[C@H]6O)C(C)(C)C5CC[C@]43C)C2CC1(C)C	2020	Site combinations	Triterpenoids	Erythrophleum	Viridiplantae
Cc1cc2c3c(coc3c1O)C(=O)C[C@H]2C(C)C	2020	New sites	Sesquiterpenoids	Talipariti	Viridiplantae
CC(C)C[C@H]1c2c(O)c(C=O)c(O)c(C=O)c2O[C@]2(C)[C@H](O)C=C(C(C)C)C[C@H]12	2020	New sites	Others	Eucalyptus	Viridiplantae
CC(=O)O[C@@H]1CC2[C@@]3(C)CCC(=O)C(C)(C)C3CC[C@@]2(C)[C@]2(C)CCC([C@]3(C)CCC(=O)O3)C12	2020	New modifications	Triterpenoids	Cleome	Viridiplantae
C=C[C@]1(C)CCC2=C(CC[C@@]3(O)[C@@](C)(C(=O)O)CCC[C@]23C)[C@H]1OC	2020	Site combinations	Diterpenoids	Talaromyces	Fungi
C[C@@H]1C[C@@H]2OC(=O)[C@]13CC[C@]14C[C@@H](OC1=O)[C@@]1(O)O[C@@]1(C)[C@@]1(O)C[C@@]2(C)[C@H]3C41	2020	New skeletons	Diterpenoids	Cephalotaxus	Viridiplantae
CC(=O)O[C@@H]1CC[C@]2(C)O[C@H]2CC[C@]2(C)O[C@@H]2C[C@]2(C(C)C)CC[C@@]1(C)O2	2020	New modifications	Diterpenoids	Boswellia	Viridiplantae
CC(=O)O[C@@H]1CC[C@@]23OC=C(C)[C@@H]1[C@]2(C)[C@H](C)CCC3=O	2020	New modifications	Sesquiterpenoids	Undefined	Others
CO[C@H]1CC[C@H]2C3=C1C(=O)O[C@H]3C[C@@H](C)[C@]21C[C@@H](c2ccoc2)OC1=O	2020	New modifications	Diterpenoids	Croton	Viridiplantae
CC(=O)O[C@@H]1C[C@@]23C[C@@]24CC[C@H](O[C@@H]2OC[C@@H](O)[C@H](OC[C@@H]5OC[C@@H](O)[C@H](O)[C@H]5O)[C@H]2O)C(C)(C)[C@@H]4CC[C@H]3[C@]2(C)C[C@@H]3OC([C@H](O)C(C)(C)O)=C[C@@H](C)[C@@H]3[C@@]12C	2020	New modifications	Triterpenoids	Actaea	Viridiplantae
C[C@@H]1C[C@H](O)[C@H]2C[C@H]3[C@]4(C)CC[C@@H]4[C@@](C)(O)CC[C@]31C2(C)C	2020	Site combinations	Diterpenoids	Trichoderma	Fungi
CC1=C2CC/C(C)=C/CC[C@@]3(C)O[C@@H]3CC/C(C)=C/[C@@H]2O[C@@H]1OO	2020	New modifications	Diterpenoids	Sarcophyton	Viridiplantae
COC(=O)[C@@]1(O)CC[C@@H]2[C@@H](C(C)(C)O)CC[C@]23CO[C@H]1C3	2020	New skeletons	Sesquiterpenoids	Penicillium	Fungi
C=C(C)C[C@@H]1Oc2c(O)c(C(C)C)cc3ccc(C)c(c23)[C@@H]1OC	2020	New modifications	Diterpenoids	Salvia	Viridiplantae
CC(C)C(=O)C1=C(O)C(C)(C)C(=O)C2=C1O[C@]1(C)CC[C@H](C(C)(C)O)[C@H]2C1	2020	New skeletons	Meroterpenoids	Hypericum	Viridiplantae
COC(=O)CC1C(=O)C[C@H]2C([C@@H]1C)[C@H](O)[CH][C@@]1(O)C(C)(C)[C@H](OC(=O)c3ccccc3)CC[C@]21C	2020	Site combinations	Diterpenoids	Caesalpinia	Viridiplantae
C=C(CC[C@H](C)[C@H]1CC[C@@]2(O)C3=C(C(=O)C[C@]12C)[C@@]1(C)CCC(=O)[C@H](C)[C@@H]1C[CH]3)C(C)C	2020	Site combinations	Steroids	Taiwanofungus	Fungi
Cc1cc2c(o1)C(=O)c1cc3c(c(O)c1C2=O)C(=O)CCCC3(C)C	2020	New skeletons	Diterpenoids	Caryopteris	Viridiplantae
C=C(CCCC(C)(C)O)c1ccc(C(=O)O)cc1O	2020	New modifications	Sesquiterpenoids	Aspergillus	Fungi
CC(C)C1=C(O)C(=O)[C@@]23O[C@]2(C1=O)[C@]1(O)OC(C)(C)O[C@@H]1[C@H]1C(C)(C)CCC[C@@]13C	2020	New sites	Diterpenoids	Salvia	Viridiplantae
C=C[C@]1(C)C[C@]2(O)OC(=O)C(C)=C2C[C@H]1C(=C)C	2020	New modifications	Sesquiterpenoids	Lindera	Metazoa
CC1=C(C)[C@H](C[C@@H](C)[C@H]2CC[C@@]3(C)C4=C(C[C@@H](O)[C@]23C)[C@@]2(C)CC[C@@H](OC(=O)CC(=O)O)C(C)(C)[C@@H]2CC4)OC1=O	2020	New modifications	Triterpenoids	Heritiera	Viridiplantae
CC1=CC[C@]23CC[C@@](C)(C(C)C)C2=CC[C@H](C)[C@H]3CC1	2020	New skeletons	Diterpenoids	Brassica	Viridiplantae
C=C(C)C1C/C=C(\C)CC/C=C(\C)C/C=C/C(C)(O)CC1	2020	New modifications	Diterpenoids	Sinularia	Metazoa
CC(C)[C@@]12C=C[C@@]3(OO1)[C@@H](CCC1C(C)(C)CCC[C@@]13C)C2	2020	New sites	Diterpenoids	Vitex	Viridiplantae
C[C@]1(C(=O)O[C@@H]2O[C@H](CO)[C@@H](O)[C@H](O)[C@H]2O)CCC[C@]2(C)[C@@H](CCC3=CCOC3=O)C(CO)=CC[C@@H]12	2020	New modifications	Diterpenoids	Pinus	Viridiplantae
C[C@H]1CC[C@@H]([C@@H](C)CCC[C@H](C)[C@@H](C)O)OC1=O	2020	New modifications	Sesquiterpenoids	Penicillium	Fungi
CC(=O)OC1C2C3C(C3C1(C)C)C1C(O)CCCC12C	2020	New skeletons	Sesquiterpenoids	Botrytis	Fungi
COC(=O)[C@@H]1O[C@@H](O)C(=O)[C@]2([C@H](O)/C=C(/C)[C@H]3OC(C)(C)C4CCC(C)=CC43)O[C@H]12	2020	New skeletons	Meroterpenoids	Trichothecium	Fungi
CC1=C(CCc2ccoc2)[C@@]2(C)CCC[C@](C)(C(=O)O[C@@H]3O[C@H](CO)[C@@H](O)[C@H](O)[C@H]3O[C@@H]3OCC[C@]3(O)C(=O)O)[C@@H]2CC1	2020	New modifications	Diterpenoids	Phlomoides	Viridiplantae
C/C(=C\COc1ccc2ccc(=O)oc2c1)CC[C@@H]1C(C)(C)C(=O)C=C[C@]1(C)O	2020	New modifications	Sesquiterpenoids	Ferula	Viridiplantae
CC1=CCC[C@@H]2[C@@](C)(CCC3=CC(=O)OC3)[C@H](C)[C@@H](O)[C@H](O)[C@@]12C	2020	New modifications	Diterpenoids	Scutellaria	Viridiplantae
CC(C)=CCC/C(C)=C/CC/C(C)=C/CC/C(C)=C/CC/C(C)=C/CCC1=CC(=O)O[C@@H]1O	2020	New sites	Triterpenoids	Dactylospongia	Metazoa
C=C1CC[C@@]23COC(=O)/C=C4\CCOC(C(C)=O)(CC/C=C\C(=O)O[C@@H]5C[C@H]6O[C@@H]2[C@H]1C[C@@]6(O)[C@]53C)[C@@H]4O	2020	New modifications	Sesquiterpenoids	Paramyrothecium	Fungi
COC(=O)C1=CC=CC2=C(CC[C@H](C)[C@]2(C)CCC2=CC(=O)OC2)C1	2020	New modifications	Diterpenoids	Caryopteris	Viridiplantae
C[C@@H]1CC[C@@H](C(C)(C)O)CC2=C1C(=O)C[C@]2(C)O	2020	New modifications	Sesquiterpenoids	Litsea	Viridiplantae
CC(C)CC(=O)c1c(O)c(C=O)c2c(c1O)C[C@H]1CC(=O)C=C[C@@]1(C)O2	2020	New skeletons	Meroterpenoids	Eucalyptus	Viridiplantae
CC(C)C[C@@H]1c2c(O)c(C=O)c(O)c(C=O)c2O[C@]2(C)C=C[C@](O)(C(C)C)C[C@H]12	2020	New sites	Others	Eucalyptus	Viridiplantae
C/C1=C/[C@H]2[C@@H](CC/C(C)=C\C(=O)C/C(C)=C\CC1)C2(C)C	2020	New modifications	Diterpenoids	Oryza	Viridiplantae
CC1O[C@@H](O[C@H]2C(O)[C@@H](O)CO[C@H]2O[C@H]2CC[C@@]3(C)C(CC[C@]4(C)C3CC=C3[C@@H]5CC(C)(C)CC[C@]5(C(=O)O[C@@H]5OC(CO[C@@H]6OC(CO)[C@@H](O)C(O)[C@@H]6O)[C@@H](O)C(O)[C@@H]5O)CC[C@]34C)C2(C)C)C(O)[C@@H](O[C@@H]2OC[C@@H](OC3OC(CO)[C@@H](OC4OCC(O)[C@@H](O[C@@H]5OC(C)C(O)[C@H](O)[C@@H]5O)[C@@H]4O)C(O)[C@@H]3O)C(O)[C@@H]2O)C1O	2020	New modifications	Triterpenoids	Scabiosa	Viridiplantae
C[C@H]1CC[C@@H](C(O)(CO)CO)CC2=C1CC[C@@H]2C	2020	Site combinations	Sesquiterpenoids	Aquilaria	Viridiplantae
C=C[C@]1(C)CCC2=C(CC[C@@]3(O)[C@@](C)(C(=O)O)[C@H](O)CC[C@]23C)[C@H]1O	2020	Site combinations	Diterpenoids	Talaromyces	Fungi
CC12CC3(O)OC(O1)C1(COC(=O)c4ccccc4)C3CC21O[C@H]1O[C@@H](CO)[C@H](O)[C@@H](O)[C@@H]1O	2020	New modifications	Monoterpenoids	Paeonia	Viridiplantae
C/C=C(\C)C(=O)OC1C(C)=CC=C(C=O)C1(C)C	2020	New modifications	Monoterpenoids	Eryngium	Viridiplantae
C=C(C)[C@H]1CC[C@]2(C(=O)O)CC[C@]3(C)[C@H](CC[C@@H]4[C@@]5(C)C[CH][C@@H](O)C(C)(C)[C@@H]5CC[C@]43C)[C@@H]12	2020	New modifications	Triterpenoids	Colubrina	Viridiplantae
CC1=C[C@@H]2C3=C(C)C(=O)O[C@H]3C[C@H](C)[C@@H]2CC1	2020	New modifications	Sesquiterpenoids	Mikania	Viridiplantae
CC(=O)C1=C[C@@H](O)[C@H]2[C@@H](CC[C@@H]3[C@]2(C)CCC[C@@]3(C)CO)[C@H]1C	2020	Site combinations	Diterpenoids	Erythrophleum	Viridiplantae
CC(=O)O[C@H]1[C@H]2[C@H](C)C3=CC(=O)O[C@]3(O)C[C@@H]2[C@@]2(C)CC[C@@H](OC(=O)c3ccccc3)[C@@](C)(C(=O)O)[C@]2(O)[C@H]1OC(=O)c1ccccc1	2020	Site combinations	Diterpenoids	Caesalpinia	Viridiplantae
CC1=C2C[C@]3(C)CC(=O)[C@@](O)(C(C)C)[C@H]3CC[C@H](C)[C@]2(O)CC1=O	2020	Site combinations	Diterpenoids	Plagiochila	Viridiplantae
C=C(CO)C(=O)O[C@H]1C[C@@]2(C=O)OC2CC/C(C)=C/[C@H]2OC(=O)C(=C)[C@H]12	2020	New modifications	Sesquiterpenoids	Dimerostemma	Viridiplantae
CC(=O)O[C@H]1C[C@H](O)[C@H](C)[C@H]2[C@H](OC(C)=O)[C@]34O[C@@]3(C)C(=O)O[C@H]4/C=C(\C)[C@@H](OC(C)=O)[C@H](O)[C@H](OC(C)=O)[C@@]12C	2020	New modifications	Diterpenoids	Briareum	Metazoa
O=C(CO)O[C@@H]1OC=C(C(=O)O)[C@H]2C[C@H]3c4[nH]c5ccccc5c4CCN3C[C@@H](O)[C@@H]12	2020	New modifications	Meroterpenoids	Neolamarckia	Viridiplantae
CC(C)[C@@H]1CC[C@]2(C)CCC[C@]3(C)OC(=O)O[C@H]1[C@@H]23	2020	New modifications	Sesquiterpenoids	Neolyngbya	Bacteria
C=C1CCC[C@]2(C)Cc3oc(C(c4ccco4)c4oc5c(c4C)C[C@H]4C(=C)CCC[C@]4(C)C5)c(C)c3C[C@@H]12	2020	New skeletons	others	Atractylodes	Viridiplantae
C[C@]12CCC[C@@](C)(CO)C1CC=C1C(=O)OC[C@@H]12	2020	New modifications	Sesquiterpenoids	Inonotus	Fungi
CCCCCC(c1c(O)cc(O[C@@H]2O[C@H](CO)[C@@H](O)[C@H](O)[C@H]2O)cc1O)c1c(O)cc(O[C@@H]2O[C@H](CO)[C@@H](O)[C@H](O)[C@H]2O)cc1O	2020	New skeletons	Others	Syzygium	Viridiplantae
CC1(C)CC[C@]2(C(=O)O[S])CC[C@]3(C)C(=CC(=O)C4[C@@]5(C)C[C@@H](O)[C@H](O)[C@@](C)(CO)C5[C@H](O)C[C@]43C)C2C1	2020	Site combinations	Triterpenoids	Centella	Viridiplantae
CC1=C[C@@H]2OC(=O)C(C)=C2C[C@@H]1O	2020	New modifications	Monoterpenoids	Myristica	Viridiplantae
C=C(CC[C@H](C)[C@H]1CC[C@H]2C3=CC[C@H]4[C@@H](C)C(=O)CC[C@]4(C)C3=C[C@@H](O)[C@@]21C)C(C)C	2020	New modifications	Steroids	Taiwanofungus	Fungi
C=C[C@@]1(C)C=C2CC[C@H]3[C@@](C)(CC[C@@H](OC(C)=O)[C@]3(C)CO)[C@@H]2C[C@@H]1O	2020	New modifications	Diterpenoids	Euphorbia	Viridiplantae
CC(C)CC(=O)CC(C)[C@H]1C=C[C@](O)(CO)CC1	2020	New modifications	Sesquiterpenoids	Curcuma	Viridiplantae
C=C[C@]1(C)C=C2C(OC)C[C@H]3[C@@](CO)(C(=O)O)CCC[C@]3(C)[C@H]2CC1	2020	New modifications	Diterpenoids	Callicarpa	Viridiplantae
CC1=CC[C@@]2(C[C@@H]1O)[C@H](C(C)C)[C@@H](O)C[C@H]2C	2020	New modifications	Sesquiterpenoids	Daphne	Viridiplantae
CC(C)[C@@H](O)[C@@H]1[C@@H]2[C@@H]3O[C@H]1[C@@]14C(CCC1(C)C)C[C@@]1(C)C(=O)C(C(=O)c5ccccc5)=C(OC3(C)C)[C@@]24C1=O	2020	New skeletons	Meroterpenoids	Hypericum	Viridiplantae
C=C1C(=O)O[C@@H]2[C@@H]3OC(=CC=C3C)[C@](C)(O)[C@@H](O)[C@@H](OC(=O)/C(=C\C)CO)[C@@H]12	2020	New modifications	Sesquiterpenoids	Campuloclinium	Viridiplantae
CC(=O)O[C@H]1O[C@@H]2OC(=O)C3=C(C)[C@H]([C@@]4(C)CCCC(C)(C)C4)CC[C@H]1[C@@H]32	2020	New modifications	Diterpenoids	Dendrilla	Metazoa
CC(C)=C[C@@H](O)C/C(C)=C/CC/C(C)=C/CC/C(C)=C/C(=O)O	2020	New modifications	Diterpenoids	Bifurcaria	Others
CO[C@H]1C=C2C3[C@@H](C)[C@H](C)CC[C@]3(C(=O)O[S])CC[C@@]2(C)[C@]2(C)C[C@@H](O)C3[C@](C)(C[C@@H](O)[C@H](O)[C@@]3(C)CO)C12	2020	New sites	Triterpenoids	Centella	Viridiplantae
CO[C@@H]1C=C(CCC2=C(C)C(=O)[C@H](O)[C@@H]3C(C)(C)C(=O)CC[C@@]23C)C(=O)O1	2020	Site combinations	Diterpenoids	Leonurus	Viridiplantae
[C]OC[C@H](CCC=C(C)C)[C@H]1CC[C@@]2(C)C3=CC[C@H]4C(C)(C)[C@H](O)CC[C@]4(C)C3=CC[C@]12C	2020	New modifications	Triterpenoids	Chisocheton	Viridiplantae
CC(C)=CCC[C@H](C(=O)O)[C@@H]1CC[C@]2(C)C3=C(CC[C@@]12C)[C@@]1(C)CCC(=O)C(C)(C)[C@@H]1CC3	2020	New modifications	Triterpenoids	Boswellia	Viridiplantae
C=C(CC/C=C(\C)CC/C=C(\C)C[C@H](O)C=C(C)C)C(O)CO	2020	New modifications	Diterpenoids	Bifurcaria	Others
COC1C=C([C@@H]2C[C@H]3O[C@]34[C@]3(C)C(=O)C[C@H]5C(C)(C)C(=O)C=C[C@]5(C)C3CC(O)[C@@]24C)C(=O)O1	2020	Site combinations	Triterpenoids	Trichilia	Viridiplantae
CC(C)c1cc2c(cc1O)[C@@H](O)[C@@H](O)[C@H]1C(C)(C)CCC[C@]21C	2020	New modifications	Diterpenoids	Dacrycarpus	Viridiplantae
COC1C(O)=C2[C@@H]3[C@@H](C)[C@H](C)CC(O)[C@]3(C)CC[C@@]2(C)[C@]2(C)CC[C@H]3[C@](C)(C(=O)O)[C@@H](O)CC[C@]3(C)[C@@H]12	2020	New sites	Triterpenoids	Stewartia	Viridiplantae
C=C(C)[C@]1(OC(=O)c2ccccc2)[C@@H](OC(C)=O)[C@@H](C)[C@@]2(O)[C@@H]([C@H](OC(C)=O)[C@@]3(C)O[C@]4([C@@H](OC(=O)c5ccccc5)[C@@H](C)C[C@@H]24)[C@@H]3OC(C)=O)[C@H]1OC(C)=O	2020	New sites	Diterpenoids	Wikstroemia	Viridiplantae
CO[C@H]1C[C@H](C)[C@H]2OC(=O)c3c(O)c(C)cc(C)c3[C@H]2O1	2020	New skeletons	Meroterpenoids	Ganoderma	Fungi
CO[C@H]1C(=O)C2=C(C(=O)C(O)=C(C(C)C)C2=O)[C@@]2(C)CCCC(C)(C)[C@H]12	2020	New sites	Diterpenoids	Salvia	Viridiplantae
C/C1=C/C[C@@H]2[C@H](CC2(C)C)[C@@](O)(CO)CC[C@H]1O	2020	New modifications	Sesquiterpenoids	Evolvulus	Viridiplantae
CC1(C)C=C(c2ccc(O)cc2)[C@H](O)CC1	2020	New sites	Others	Zea	Viridiplantae
C=C1CCC[C@]2(C)C[C@@]3(OC)OC(=O)C(C)=C3C[C@@H]12	2020	New modifications	Sesquiterpenoids	Atractylodes	Viridiplantae
C[C@H]1C[C@@H](O)C[C@@]2(C)CCC(=O)C[C@H]12	2020	New modifications	Sesquiterpenoids	Streptomyces	Bacteria
CC1=C[C@@H]2c3c(C)coc3C(=O)[C@H](C)[C@@H]2CC1	2020	New modifications	Sesquiterpenoids	Mikania	Viridiplantae
CC1(C)C=C2C3C[C@@H](O)C4C5(C)C[C@@H](O)[C@H](O)C(C)(C)C5CC[C@@]4(C)[C@]3(C)CC[C@@]2(C)CC1	2020	New sites	Triterpenoids	Salvia	Viridiplantae
CN1C[C@H](O)C[C@H]1C(=O)O	2020	New sites	Others	Adenocalymma	Viridiplantae
C=C(C)[C@@H]1CC[C@H](C)[C@@]2(O)CC(=O)C(C)=C2C1	2020	New modifications	Sesquiterpenoids	Stellera	Viridiplantae
CC1(C)CC2=C(CO)C[C@@]3(O)CC[C@](C)(O3)[C@H]2C1	2020	New skeletons	Sesquiterpenoids	Conocybe	Fungi
CC(=O)[C@H]1[C@H](O)C[C@@]2(C)[C@@H]3CC=C4[C@@H](CC(=O)[C@@H](O)C4(C)C)[C@]3(C)C(=O)C[C@]12C	2020	New modifications	Triterpenoids	Dendrobium	Viridiplantae
CC1=C(O)C(=O)[C@]23C(=O)[C@H]1[C@H](O)[C@@H](C)[C@H]2CC[C@H]3C	2020	New sites	Sesquiterpenoids	Rhodotus	Fungi
C[C@H]1CC[C@H](C(C)(C)O)C[C@]2(C)C1=C[C@@H]1O[C@@H]12	2020	New modifications	Sesquiterpenoids	Aristolochia	Viridiplantae
COC(=O)C1=CO[C@@H](O[C@@H]2O[C@H](CO)[C@@H](O)[C@H](O)[C@H]2O)[C@@H]2[C@H](C)O[C@H](O[C@H]3O[C@H](CO)[C@@H](O)[C@H](O)[C@H]3O)C[C@H]12	2020	New modifications	Monoterpenoids	Cornus	Viridiplantae
C=C1C2[C@H](O)[C@H](OC(=O)c3ccc(O)cc3)[C@]3(C)C([C@H](O)CC4[C@@]5(C)CCC(C(C)C)=C5CC[C@]43C)[C@@]2(C)CC[C@@H]1O	2020	New modifications	Triterpenoids	Fagaropsis	Viridiplantae
CCCCCCCCCCCCCCCC(=O)O[C@@H]1CC[C@@]2(C)[C@@H](CC[C@]3(C)[C@@H]2CC=C2[C@@H]4[C@@H](C)[C@H](C)CC[C@]4(C(=O)O[C@@H]4O[C@@H](CO)[C@H](O)[C@H]4O)CC[C@]23C)C1(C)C	2020	New modifications	Triterpenoids	Ajuga	Viridiplantae
C=C[C@@](C)(O)CC/C=C(\C)CC[C@@H](Br)C(C)(C)Cl	2020	New modifications	Sesquiterpenoids	Laurencia	Others
CC(C)CC(=O)c1c(O)c([C@H](C2=C(O)C(C)(C)C(=O)C(C)(C)C2=O)C(C)C)c(O)c2c1O[C@]1(C)C=C[C@@H](C(C)C)C[C@H]21	2020	New modifications	Meroterpenoids	Callistemon	Viridiplantae
Oc1ccc(Cc2nccc3c2[nH]c2ccc(O)cc23)cc1	2020	New skeletons	Others	Neolitsea	Viridiplantae
CCN1C[C@]2(CO)CC[C@H](OC)[C@]34C1[C@H](C[C@H]23)[C@@]1(OC)C[C@H](OC)[C@H]2C[C@@H]4[C@@H]1[C@H]2OC	2021	New modifications	Diterpenoids	Delphinium	Viridiplantae
C[C@H]1CC[C@@H]([C@](C)(O)CO)CC2=C1CC[C@@H]2C	2021	New modifications	Sesquiterpenoids	Lindera	Viridiplantae
C=C(C)C(CC=C(C)C)Cc1c(O)c(OC)c2c(c1O)C(=O)C(O)C(c1ccc3c(c1)OCO3)O2	2021	New sites	Sesterterpenoids	Sophora	Viridiplantae
CO[C@]1(C2=CC(=O)OC2O)C[C@]2(C)[C@@H](C)C[C@@H](OC(C)=O)[C@]3(COC(C)=O)C2(CC[C@@H]2O[C@@]23C)O1	2021	Site combinations	Diterpenoids	Scapania	Viridiplantae
COc1cc(C[C@H]2C(=O)OC[C@@H]2Cc2ccc3c(c2)OCO3)cc(OC)c1OC	2021	New sites	Others	Salvia	Viridiplantae
C[C@H]1CC[C@H]2[C@@H](C[C@@H](C)[C@]3(O)C(=O)C=C(S)[C@H]3C(=O)C1)C2(C)C	2021	New skeletons	Diterpenoids	Sinularia	Metazoa
C=C1[C@@H](O)CC[C@]2(C)C3CC=C4C5[C@](C)(O)[C@H](O)CC[C@]5(C(=O)O)CC[C@@]4(C)[C@]3(C)CC[C@@H]12	2021	New skeletons	Triterpenoids	Achyrocline	Viridiplantae
CC1(C)CCC[C@]2(C)C3=CC(=O)OC[C@]3(O)CCC12	2021	Site combinations	Diterpenoids	Wurfbainia	Viridiplantae
CC(C)(O)[C@H]1CC[C@@](C)([C@H]2[C@@H](O)C[C@@]3(C)[C@@H]4CC[C@H]5[C@@](C)(CO[C@@H]6O[C@@H](CO)[C@@H](O)[C@H](O)[C@@H]6O)[C@@H](O[C@@H]6O[C@@H](CO)[C@H](O)[C@H](O)[C@@H]6O)CC[C@@]56C[C@@]46CC[C@]23C)O1	2021	Site combinations	Triterpenoids	Thalictrum	Viridiplantae
CC(=O)O[C@@H]1CC[C@]2(C)[C@H]3CC=C4[C@@H](CC[C@@]5(C)CC[C@@H](C)[C@H](C)[C@@H]45)[C@]3(C)CC[C@H]2[C@@]1(C)C(=O)O	2021	Site combinations	Triterpenoids	Boswellia	Viridiplantae
CC1(C)/C=C/C(=O)/C(CO)=C/CC[C@]2(C)O[C@H]2C1	2021	Site combinations	Sesquiterpenoids	Syringa	Viridiplantae
C=C1C(=O)O[C@@H]2C3=C(C)[C@H](O)C[C@@H](O)[C@]3(C)C[C@H](OC(=O)C(C)CC)C12	2021	New modifications	Sesquiterpenoids	Artemisia	Viridiplantae
C=C(C)[C@H]1CC[C@]2(C=O)CC[C@]3(C)[C@H](CC[C@@H]4[C@@]5(C)CCC(=O)C(C)(C)[C@@H]5CC[C@]43C)[C@@H]12	2021	New modifications	Triterpenoids	Diospyros	Viridiplantae
C[C@@H]1CC[C@]2(C(=O)O)CC[C@]3(C)C(=CC[C@@H]4[C@@]5(C)CC[C@H](O)[C@@](C)(C=O)[C@@H]5C(=O)C[C@]43C)C2[C@]1(C)O	2021	New modifications	Triterpenoids	Uncaria	Viridiplantae
C[C@]1(OC(=O)/C=C/c2ccc(O)cc2)CO[C@@]2(C[C@@H]([C@@H]3CC[C@]45C[C@]34C=C[C@@H]3[C@@]4(C)CC=C6C[C@@H](c7ccccc7)OC[C@]6(C)[C@@H]4CC(=O)[C@]35C)C(=O)O2)[C@@H]1O	2021	New modifications	Triterpenoids	Dichapetalum	Viridiplantae
C=C1CC[C@@H]2Cc3c(O)c(C=O)c(O)c(C=O)c3O[C@@]2(C)CC[C@@H]2[C@@H]1CC2(C)C	2021	New skeletons	Meroterpenoids	Psidium	Viridiplantae
C=C[C@@H]1CC(C)(C)C/C1=C1/[C@@H](CC(=O)OC)CO[C@H]1O	2021	New modifications	Sesquiterpenoids	Irpex	Fungi
CC(=O)O[C@@H]1C[C@H]2[C@@H](C)C3=CC(=O)OC3=C[C@@H]2[C@@]2(C)CCCC(C)(C)[C@H]12	2021	New modifications	Diterpenoids	Caesalpinia	Viridiplantae
COc1ccc(CCC(=O)c2c(O)cc(OC)c3c2O[C@@]2(C)C=C[C@H](C(C)C)C[C@@H]32)cc1	2021	New sites	Meroterpenoids	Sarcandra	Viridiplantae
CC1(C)C(=O)CC[C@]2(C)[C@@H]3COC(=O)C3=C[C@@H](O)[C@@H]12	2021	New modifications	Sesquiterpenoids	Cyathus	Fungi
C=C[C@@]1(C)O[C@]2(C)CC[C@@H]3[C@](C)(CCC[C@@]3(C)CO)[C@H]2C[C@H]1O	2021	New modifications	Diterpenoids	Blumea	Viridiplantae
CC1=CCC[C@]2(C)[C@@H](O)C[C@@H]([C@H](C)CO)C[C@@H]12	2021	New modifications	Sesquiterpenoids	Aquilaria	Viridiplantae
C[C@@]12C[C@@H](c3ccoc3)OC(=O)[C@]1(O)CC[C@@H]1[C@H](O[C@@H]3O[C@H](CO)[C@@H](O)[C@H](O)[C@H]3O)C[C@H](O)C[C@H]12	2021	New sites	Diterpenoids	Tinospora	Viridiplantae
C=C(CCC=C(C)C)[C@@H]1CC=C(C)[C@@H](O)[C@H]1O	2021	New modifications	Sesquiterpenoids	Eutypella	Fungi
CC[C@@H](C)[C@@H](OC(C)=O)[C@@H](C)c1cc(O)c2c(c1)O[C@]1(C)CC[C@H]3O[C@@H](C(C)(C)O)CC[C@]3(C)C1=C2	2021	Site combinations	Meroterpenoids	Bipolaris	Fungi
COC(=O)C[C@H]1[C@]2(C)C[C@]3(O)[C@](OC(=O)C(C)C)(C(=O)[C@H]2OC(=O)C(C)C)C2=C(CC[C@]4(C)C2=CC(=O)O[C@H]4c2ccoc2)[C@]13C	2021	New modifications	Triterpenoids	Xylocarpus	Viridiplantae
CC1=C/C(=C\[C@H](C)C(=O)[C@@]2(C)CC[C@]34C[C@]56OC(=O)C[C@H]5OC(C)(C)[C@@H]6CC[C@@]3(O)C(=O)[C@](O)(C2)O4)OC1=O	2021	New modifications	Triterpenoids	Schisandra	Viridiplantae
C/C1=C/C[C@H](O)C(C)(C)C(=O)[C@@H](O)C[C@]2(O)C[C@@](C)(O)[C@@H]3CC[C@@H]1[C@@H]32	2021	New modifications	Diterpenoids	Rhododendron	Viridiplantae
CC(=O)O[C@H]1C[C@H](C)[C@]2(CC[C@]3(COC(=O)C3)O2)[C@@]2(C)CCCC(C)(C)[C@H]12	2021	New modifications	Diterpenoids	Vitex	Viridiplantae
CC1=CC(=O)CC(C)(C)[C@]12CC=C(CO)CC2	2021	New modifications	Sesquiterpenoids	Steccherinum	Fungi
CC(=O)OC1[C@@H]2[C@H](C[C@@]3(O)OC(=O)C=C3[C@]2(C)O)[C@@]2(C)[C@@H](OC(C)=O)CCC(C)(C)[C@]2(O)[C@H]1OC(C)=O	2021	New modifications	Diterpenoids	Guilandina	Viridiplantae
CC(C)c1cc(O)c2c(c1)[C@H](O)C[C@H]1C(C)(C)CCC[C@]21C	2021	New modifications	Diterpenoids	Kaempferia	Viridiplantae
CC(C)=CCC(O)[C@@H](C(=O)O[C@@H]1O[C@@H](CO[C@@H]2OC[C@@H](O)[C@H](O)[C@@H]2O)[C@@H](O)[C@H](O)[C@@H]1O)[C@H]1CC[C@@]2(C)[C@@H]3CC[C@H]4[C@@](C)(CO)[C@@H](O[C@@H]5OC[C@@H](O)[C@H](O)[C@@H]5O[C@@H]5O[C@@H](CO)[C@@H](O)[C@H](O)[C@@H]5O)CC[C@@]45C[C@@]35CC[C@]12C	2021	New modifications	Triterpenoids	Thalictrum	Viridiplantae
C[C@]12CC[C@]3(C1)[C@H](C[C@@H]2O)C[C@@H](OC(=O)c1ccccc1)[C@@H]1[C@]3(C)CCC[C@@]1(C)C(=O)O	2021	New modifications	Diterpenoids	Scoparia	Viridiplantae
CC(C)(O)CCC(=O)[C@](C)(O)[C@H]1[C@H](O)[C@@H](O)[C@@]2(C)[C@@H]3[C@@H](O)C=C4[C@@H](C[C@H](O)C(=O)C4(C)C)[C@]3(C)C(=O)C[C@]12C	2021	Site combinations	Triterpenoids	Acanthosicyos	Viridiplantae
COC(=O)C[C@H]1C(C)(C)C(=O)C=C[C@]1(C)[C@H]1CC[C@@]2(C)[C@H](C3=CC(=O)O[C@H]3O)C[C@H]3O[C@]32[C@]1(C)O	2021	Site combinations	Triterpenoids	Toona	Viridiplantae
CC(C)(O)[C@H](O)CC[C@H](C(=O)O)[C@@H]1CC[C@]2(C)C3=CC[C@H]4C(C)(C)C(=O)CC[C@]4(C)C3=CC[C@@]12C	2021	New modifications	Triterpenoids	Boswellia	Viridiplantae
CC(=O)O[C@H]1C[C@@]2(C)[C@H](c3ccoc3)OC(=O)[C@H]3O[C@]32[C@@]2(C)C1[C@@]1(C)[C@@H](OC(C)=O)CC(=O)OC(C)(C)[C@@H]1[C@H](OC(C)=O)[C@H]2OC(C)=O	2021	Site combinations	Triterpenoids	Aglaia	Viridiplantae
Cc1cccc2c1ccc1cc(C(C)CO)c3c(c12)O[C@@H](OC(=O)/C=C/c1ccc(O)c(O)c1)[C@H](c1ccc(O)c(O)c1)O3	2021	Site combinations	Diterpenoids	Salvia	Viridiplantae
CC1=CC[C@@H]([C@](C)(O)CC/C=C(\C)CO[C@@H]2OC(CO)[C@@H](O)[C@@H](O)C2O)CC1	2021	New modifications	Sesquiterpenoids	Eleutherococcus	Viridiplantae
C=C(C)[C@@H]1C[C@@H](O)C2=C(C(=O)C(=O)[C@@]3(C)[C@@H]4[C@@H](O)C[C@H](C(C)C)[C@@]4(C)CC[C@]23C)[C@@]1(C)/C=C/C(=O)OC	2021	New sites	Triterpenoids	Iris	Viridiplantae
CC(C)c1cc(O)c2c(c1O)C(=O)C[C@H]1C(C)(C)CCC[C@]21C	2021	New modifications	Diterpenoids	Salvia	Viridiplantae
COC[C@@H]1C(=O)O[C@@H]2[C@H]3C(C)=CCC3=C(CO)CC[C@H]21	2021	Site combinations	Sesquiterpenoids	Artemisia	Viridiplantae
C=C(C)[C@@H]1CC[C@](C)(O)[C@@H]2CC(=O)C(C)=C2C1	2021	New modifications	Sesquiterpenoids	Stellera	Viridiplantae
CC(C)(O)[C@@H]1CC[C@](C)(O)C2=C(C1)[C@@](C)(O)CC2=O	2021	Site combinations	Sesquiterpenoids	Cinnamomum	Viridiplantae
C=C1CCC[C@@H]2[C@]1(C)CC[C@@]1(C)OC3=C(C[C@@]21C)C(=O)C(NCC(C)C)=CC3=O	2021	New modifications	Meroterpenoids	Dactylospongia	Metazoa
CCOC1CC[C@]23CC(=O)c4c(O)ccc(O)c4[C@]12COC3=O	2021	New modifications	Meroterpenoids	Ganoderma	Fungi
C[C@@H]1C2=C(CC[C@@]13CC=CC1=C3COC1=O)C(=O)O[C@@H]2C1C=COC1	2021	Site combinations	Diterpenoids	Salvia	Viridiplantae
Cc1ccc([C@H](C)CC[C@H](O)C(C)(C)O)c(O)c1	2021	New modifications	Sesquiterpenoids	Plakortis	Metazoa
CC(C)[C@H]1C=C[C@@](C)(O)[C@@H](O)C1	2021	New modifications	Monoterpenoids	Lanxangia	Viridiplantae
C[C@@H]1CC[C@H](O)[C@]2(C)[C@@H]1[C@H]1[C@](O)([C@H](C)CC[C@@]13OC3(C)C)[C@H](O)[C@H]2O	2021	New sites	Diterpenoids	Briareum	Metazoa
COc1cc([C@@H]2c3cc4c(cc3C(=O)C3COC(=O)C32)OCO4)cc(OC)c1OC	2021	New sites	Diterpenoids	Salvia	Viridiplantae
CCO[C@H]1C2=C(C)C(=O)O[C@@H]2C[C@@]2(O)CCC[C@H](C)[C@@]12C	2021	New modifications	Sesquiterpenoids	Ligularia	Viridiplantae
C=C(C(=O)O)[C@@H]1C[C@@]2(C)O[C@]23CCC[C@H](C)[C@]3(O)C1	2021	New sites	Sesquiterpenoids	Lindera	Viridiplantae
C/C(=C\CC[C@@](C)(O)[C@H]1CC[C@@]2(C)C3=CC[C@H]4C(C)(C)[C@@H](O)CC[C@]4(C)C3=CC[C@]12C)C(=O)O	2021	New modifications	Triterpenoids	Ganoderma	Fungi
CC1(C)C(O)C[C@H]2[C@@]3(C)O[C@H](C[C@@]45CC(=O)[C@@](C)(CC[C@H]43)C5)[C@]21O	2021	New sites	Diterpenoids	Rhododendron	Viridiplantae
CC1(C)[C@@H](Cl)CC[C@]2(C)[C@@H](C(=O)O)[C@](C)(O)CC[C@@]12O	2021	New modifications	Sesquiterpenoids	Phomopsis	Fungi
C[C@@H]1C2C3=CCC4[C@@]5(C)C[C@@H](O)[C@H](OC(=O)/C=C/c6ccc(O)cc6)C(C)(C)C5CC[C@@]4(C)[C@]3(C)CC[C@@]2(C(=O)O)CC[C@H]1C	2021	New modifications	Triterpenoids	Syzygium	Viridiplantae
CC1=C/C(=C/[C@@H](C)C(=O)[C@@]2(C)CC[C@]34C[C@]56OC(=O)C[C@H]5O[C@@](C)(CO)[C@@H]6CC[C@@H]3C(=O)[C@](O)(C2)O4)OC1=O	2021	Site combinations	Triterpenoids	Schisandra	Viridiplantae
C[C@H](C/C=C/C(C)(C)O)[C@H]1[C@H](O)C[C@@]2(C)[C@@H]3CC[C@H]4C(C)(C)[C@@H](O)CC[C@]4(O)CC3=CC[C@]12C	2021	Site combinations	Triterpenoids	Lepidozia	Viridiplantae
Cc1coc2c1C(=O)[C@@H]1[C@@](C)(O)CCC(=O)[C@@]1(C)C2	2021	New modifications	Sesquiterpenoids	Chloranthus	Viridiplantae
CC(=O)O[C@H]1C[C@@]2(C)[C@H](c3ccoc3)OC(=O)[C@H]3O[C@]32[C@@]2(C)C1[C@@]1(C)[C@@H](OC(C)=O)CC(=O)OC(C)(C)[C@@H]1C(=O)[C@H]2OC(C)=O	2021	Site combinations	Triterpenoids	Aglaia	Viridiplantae
C=C1[C@H](OC(C)=O)[C@@H](OC(C)=O)[C@@H](OC(C)=O)C(C)(C)/C=C\[C@H](C)C(=O)[C@@]2(OC(C)=O)C[C@H](C)[C@H](OC(C)=O)[C@@H]2[C@H]1OC(C)=O	2021	New modifications	Diterpenoids	Euphorbia	Viridiplantae
CC[C@@H](C)[C@@H](OC(C)=O)[C@@H](C)C1=C[C@]2(O)CO[C@H]3C2=C(O[C@]2(C)CC[C@H]4O[C@@H](C(C)(C)O)CC[C@]4(C)[C@@H]32)C1=O	2021	New skeletons	Meroterpenoids	Bipolaris	Fungi
CC(=O)OC[C@]12[C@@H](OC(=O)c3ccoc3)C[C@@H]3[C@H](OC(C)=O)[C@]1(OC3(C)C)[C@@](C)(O)[C@@H](O)[C@H](OC(C)=O)[C@@H]2OC(=O)c1cccnc1	2021	New modifications	Sesquiterpenoids	Tripterygium	Viridiplantae
CC(=O)O[C@H]1C[C@@H](C(=O)O)CC2=C(C)[C@H](O)CC[C@@]21C	2021	New sites	Sesquiterpenoids	Artemisia	Viridiplantae
CC1=C2C(=O)C[C@H](CO)[C@]23CC[C@@H](C3)C1(C)C	2021	New modifications	Sesquiterpenoids	Aquilaria	Viridiplantae
C=C1CCC2C(C)(C)CCCC2(C)C1CCc1ccoc1	2021	New modifications	Diterpenoids	Cacospongia	Metazoa
CC(=O)OCC[C@H]1[C@](C)(C2=C(C)[C@H](c3ccoc3)CC2)[C@H](O)[C@@H]2OC[C@]3(C)[C@H](OC(C)=O)C[C@H](OC(C)=O)[C@@]1(C)[C@@H]23	2021	Site combinations	Triterpenoids	Munronia	Viridiplantae
C=C(C)C(=O)O[C@@H]1[C@@H](OC(C)=O)/C(CO)=C\CC/C(C)=C\[C@H]2OC(=O)C(=C)[C@H]12	2021	New modifications	Sesquiterpenoids	Sigesbeckia	Viridiplantae
CC1=C[C@H]2O[C@H](C[C@H](C)O)C[C@H](C)[C@H]2CC1	2021	Site combinations	Sesquiterpenoids	Trichoderma	Fungi
CC(=O)O[C@@H]1C[C@H]2C(C)=CC(=O)C[C@@H]2[C@@]2(C)CCCC(C)(C)[C@H]12	2021	New sites	Diterpenoids	Caesalpinia	Viridiplantae
C=C1C[C@H](OC(=O)C(C)C)CC2(CO)O[C@H](C[C@H]2O)/C(C)=C\COC1=O	2021	Site combinations	Sesquiterpenoids	Calea	Viridiplantae
COC(=O)[C@@]1(C)CC[C@]2(C(=O)O[C@H]3O[C@@H](CO)[C@H](O)[C@@H](O)[C@@H]3O)CC[C@]3(C)C(=CCC4[C@@]5(C)CC[C@H](O[C@@H]6O[C@H](CO)[C@@H](O)[C@H](O)[C@H]6O[C@@H]6O[C@H](CO)[C@@H](O)[C@H](O)[C@H]6O)[C@@](C)(CO)C5CC[C@]43C)C2C1	2021	New sites	Triterpenoids	Pericampylus	Viridiplantae
C=C1[C@@H](OC(=O)/C(C)=C\C)[C@@H](O)[C@@H](OC(=O)c2cccnc2)C(C)(C)/C=C/[C@H](C)[C@@H](OC(C)=O)[C@@]2(O)C[C@@](C)(OC(C)=O)[C@H](OC(=O)c3ccccc3)[C@@H]2[C@H]1OC(C)=O	2021	New modifications	Diterpenoids	Euphorbia	Viridiplantae
C/C=C(\C)C(=O)O[C@@H]1/C(C)=C/[C@@]23O[C@@]2(C[C@H](C)[C@@H]3OC(C)=O)C(=O)[C@H](C)[C@H](OC(C)=O)[C@@H]2[C@H]([C@@H]1OC)C2(C)C	2021	New modifications	Diterpenoids	Euphorbia	Viridiplantae
COC(=O)C/C(C=O)=C\C[C@@]1(C)[C@H](C)CC[C@@]2(C)C(C)=CC(=O)C[C@H]12	2021	New modifications	Diterpenoids	Monoon	Viridiplantae
C=C1[C@H](OC(C)=O)[C@@H](OC(C)=O)[C@@H](OC(C)=O)C(C)(C)/C=C\[C@H](C)C(=O)[C@@]2(OC(C)=O)C[C@@](C)(OC(C)=O)[C@H](OC(C)=O)[C@@H]2[C@H]1OC(C)=O	2021	New modifications	Diterpenoids	Euphorbia	Viridiplantae
CCOC(=O)[C@@]1(C)CC[C@H]2C(C)(C)C(=O)CC[C@]2(C)[C@@H]1CC(=O)O	2021	New skeletons	Sesquiterpenoids	Stelletta	Metazoa
CC1=C[C@@H]2[C@@H](C(C)(C)O)CC[C@H](C)[C@H]2CC1	2021	New modifications	Sesquiterpenoids	Trichoderma	Fungi
CC1=CC(=O)C[C@@]2(C)CO[C@H](CO)[C@@]12C	2021	New skeletons	Others	Dioscorea	Viridiplantae
COC(=O)C[C@H]1C(C)(C)[C@H](OC(=O)C(C)C)[C@]2(O)CC3=C(CC[C@]4(C)C3=CC(=O)O[C@H]4c3ccoc3)[C@@]1(C)C2=O	2021	New modifications	Triterpenoids	Xylocarpus	Viridiplantae
C=C1C(=O)O[C@@H]2[C@@H]3C(CO)=CC(=O)C3=C(C)C[C@H](O)[C@@H]12	2021	New modifications	Sesquiterpenoids	Cichorium	Viridiplantae
CC(C)=CCS	2021	New modifications	Others	Cannabis	Viridiplantae
CC1=CCC[C@@H]2[C@@](C)(CC/C(C)=C/CO)[C@H](C)CC[C@@]12C	2021	New modifications	Diterpenoids	Panicum	Viridiplantae
CC1=C/C(=C/[C@H](C)C(=O)[C@@]2(C)CC[C@]34C[C@]56OC(=O)C[C@H]5O[C@@](C)(CO)[C@@H]6CC[C@@]3(O)C(=O)[C@](O)(C2)O4)OC1=O	2021	Site combinations	Triterpenoids	Schisandra	Viridiplantae
C=C(CCC=C(C)C)C1CC[C@]2(C)C1[C@H](O)CC1[C@@]3(C)C[C@@H](O)[C@H](O[C@@H]4O[C@@H](CO)[C@@H](O)[C@H](O)[C@@H]4O[C@@H]4O[C@H](CO)[C@@H](O)[C@H](O)[C@H]4O)C(C)(C)C3CC[C@]12C	2021	New modifications	Triterpenoids	Gynostemma	Viridiplantae
COC(=O)C1=CO[C@@H](OC2OC(CO)C(O)C(O)C2O)[C@H]2[C@@H]1[C@H](OC(=O)/C=C/c1ccc(OC)c(O)c1)C[C@]2(C)O	2021	New modifications	Monoterpenoids	Pseudocaryopteris	Viridiplantae
C[C@@H]1C[C@@H]2OC(=O)c3cccc(c32)[C@@]12C[C@@H](c1ccoc1)OC2=O	2021	New modifications	Diterpenoids	Croton	Viridiplantae
CC(C)CC(=O)O[C@@H]1OC=C(CO[C@@H]2O[C@H](CO)C[C@H](O)[C@H]2O)[C@H]2C[C@H](O)[C@H](CO)[C@@H]12	2021	New modifications	Monoterpenoids	Patrinia	Viridiplantae
COC(=O)[C@@]12CCCC3=C1[C@@H](C[C@H](C)[C@]31C[C@@H](c3ccoc3)OC1=O)OC2=O	2021	New modifications	Diterpenoids	Croton	Viridiplantae
CO[C@H]1C[C@@H]2C(C)(C)CCC[C@@]2(C)C2C1=CC1=C(CO)C(=O)O[C@@]1(O)[C@@H]2O	2021	New modifications	Diterpenoids	Euphorbia	Viridiplantae
COC1=CC(=O)C(OC)=C(C[C@@]2(C)[C@@H]3CCC=C(C)[C@@]3(C)CC[C@H]2C)C1=O	2021	New modifications	Meroterpenoids	Dysidea	Metazoa
C[C@H]1C(=O)O[C@@H]2C3=C(C(=O)C[C@@]3(C)O)[C@@](C)(O)CC[C@H]21	2021	New modifications	Sesquiterpenoids	Artemisia	Viridiplantae
CC(C)=C[C@@H](O)C[C@@H](C)[C@H]1CC[C@@]2(C)C3=CC[C@H]4C(C)(C)[C@@H](O)CC[C@]4(C)C3=CC[C@]12C	2021	New modifications	Triterpenoids	Rigidoporus	Fungi
C=C1C[C@H](OC(=O)/C(C)=C\C)CC2(CO)O[C@H](C[C@H]2O)/C(C)=C\COC1=O	2021	Site combinations	Sesquiterpenoids	Calea	Viridiplantae
CC(C)c1cc2c(c(O)c1O)C[C@@]1(O)[C@@H](O)CCC(C)(C)[C@@H]1CC2	2021	Site combinations	Diterpenoids	Salvia	Viridiplantae
C/C=C\C(=O)O[C@@H]1CC[C@]2(CO2)[C@]2(COC(C)=O)[C@@H](OC(C)=O)C[C@@H](C)[C@](C)(CCC3=CC(=O)OC3)[C@@H]12	2021	New modifications	Diterpenoids	Ajuga	Viridiplantae
CC(C)C1OCC(C)(C)C1C	2021	New skeletons	Monoterpenoids	Limonium	Viridiplantae
C=C[C@@](C)(/C=C/c1ccc(OC(C)(C)[C@H]2CC[C@@](C)(C=C)[C@@H]([C@H](O)c3ccc(O)cc3)O2)cc1)CCC=C(C)C	2021	New modifications	Meroterpenoids	Cullen	Viridiplantae
CC1(C)CC[C@]2(C(=O)O)CC[C@]3(C)C(=CC[C@@H]4[C@@]5(C)CCC(=O)C(CO)(CO)[C@@H]5CC[C@]43C)[C@@H]2[C@@H]1O	2021	Site combinations	Triterpenoids	Enkianthus	Viridiplantae
CC1=C2CC[C@H](C)[C@@H]2CC2=C(C)C(=O)O[C@@]2(O)C1	2021	New modifications	Sesquiterpenoids	Stellera	Viridiplantae
CC1=C(CO)C2=CC(=O)c3c(O)c4c(c(O)c3[C@@]2(C)CC1)O[C@@H](C)C4	2021	Site combinations	Diterpenoids	Dracocephalum	Viridiplantae
C=C1CCC(C)=C1C[C@@H](CC[C@H](C)O)C(=C)C(=O)O	2021	New skeletons	Sesquiterpenoids	Artemisia	Viridiplantae
CC1(C)CC[C@H]2OC(=O)c3c(C(=O)O)ccc1c32	2021	New sites	Sesquiterpenoids	Salvia	Viridiplantae
CCOC1CC[C@]23CC(=O)c4c(O)ccc(O)c4[C@@]12COC3=O	2021	New modifications	Meroterpenoids	Ganoderma	Fungi
CC(C)CC(=O)O[C@H]1C[C@](C)(O)C2=C([C@H]3OC(=O)[C@@H](C)[C@H]13)[C@](C)(O)OC2=O	2021	New modifications	Sesquiterpenoids	Achillea	Viridiplantae
CC1=C(C)C2=CC(=O)C3=C(C(=O)C4=C(C[C@H](C)O4)C3=O)[C@@]2(C)CC1	2021	New modifications	Diterpenoids	Clerodendrum	Viridiplantae
CC(=O)O[C@@H]1CC[C@]2(C)[C@H]3CC[C@@]4(C)[C@H]([C@@H](C)CC/C=C(/C)C(=O)O)CC[C@]4(C)C3=CC(=O)[C@H]2C1(C)C	2021	New modifications	Triterpenoids	Pistacia	Viridiplantae
CC1(C)[C@@H](O)C[C@@H]2[C@H]1[C@@]1(O)C[C@]34C[C@@](C)(O)[C@H](CC[C@@H]3[C@]2(C)O1)[C@H]4O	2021	New modifications	Diterpenoids	Rhododendron	Viridiplantae
Cc1ccc(C(C)O)cc2c(C=O)ccc1-2	2021	New modifications	Sesquiterpenoids	Lactarius	Metazoa
CC1=CC(=O)C2=C(C)CC[C@@H]3[C@@H](C)C(=O)O[C@H]3[C@@]12O	2021	New modifications	Sesquiterpenoids	Artemisia	Viridiplantae
CC(=O)[C@@H]1CC[C@@]2(C)OC3=C(C[C@@H]12)C(=O)[C@]1(O)CO[C@H]3C1	2021	New skeletons	Meroterpenoids	Phyllosticta	Fungi
C=C[C@]1(C)CC[C@@H](C(=C)C)[C@H](c2ccc(O)cc2)[C@H]1O	2021	New modifications	Meroterpenoids	Cullen	Viridiplantae
CCO[C@@]1(C)CC[C@@H]2[C@@H]1[C@]1(C=C(C)C(=O)O1)C[C@@H](O)[C@]2(C)O	2021	New modifications	Sesquiterpenoids	Spongia	Metazoa
CO[C@H]1C[C@@H]2C(C)(C)CCC[C@@]2(C)C2C1=CC1=C(CO)C(=O)O[C@@]1(OC)[C@@H]2O	2021	New modifications	Diterpenoids	Euphorbia	Viridiplantae
COC(=O)C[C@H]1C(C)(C)OC(=O)C[C@H]2O[C@]34CC(=O)O[C@@H](c5ccoc5)[C@]3(C)C[C@H](O)C=C4C[C@@]21C	2021	New skeletons	Triterpenoids	Harrisonia	Viridiplantae
C[C@H](CO)CCC/C(=C/CC/C(=C/C(=O)c1cc(O)ccc1O)C(=O)O[C@@H](CC[C@@H](C)[C@H]1CC[C@@]2(C)C3=CC[C@H]4C(C)(C)C(=O)CC[C@]4(C)C3=CC[C@]12C)[C@](C)(O)CO)CO	2021	New sites	Meroterpenoids	Ganoderma	Fungi
CC1(C)CCC[C@@]2(C)[C@H]1[C@H](OC(=O)/C=C/C=C/C=C/C=O)C=C1COC(=O)[C@@]12O	2021	New modifications	Sesquiterpenoids	Aspergillus	Fungi
CC(C)=CCC/C(C)=C1\CC=C(C)[C@@H](O)[C@H]1O	2021	New modifications	Sesquiterpenoids	Eutypella	Fungi
COC(=O)C1=CO[C@@H](O[C@@H]2O[C@@H](C)[C@H](O)[C@@H](O)[C@H]2O)[C@@H]2C(CO[C@@H]3O[C@@H](C)[C@H](O)[C@@H](O)[C@H]3O)=CC[C@H]12	2021	New modifications	Monoterpenoids	Gardenia	Viridiplantae
C=C(C)C1CC[C@H](C)[C@@H]2CC(=O)C(C)=C2[C@H]1O	2021	New modifications	Sesquiterpenoids	Stellera	Viridiplantae
O=c1cc(CCc2ccccc2)oc2c1[C@H](O)[C@H](O)[C@@H](O)[C@@H]2O	2021	New skeletons	others	Aquilaria	Viridiplantae
CC(C)=CCC[C@@](C)(O)[C@@H]1CC=C(CO[C@@H]2OC(CO)[C@@H](O)[C@@H](O)C2O)CC1	2021	New modifications	Sesquiterpenoids	Eleutherococcus	Viridiplantae
C=C1[C@H]2C[C@H]2[C@]2(C)Cc3oc([C@]45C(=O)OC(=O)[C@]4(C)Cc4cccc(C)c4[C@@H]5O)c(C)c3[C@H](O)[C@@H]12	2021	New skeletons	Sesquiterpenoids	Lindera	Viridiplantae
COC(=O)C[C@H]1C(C)(C)OC(=O)C[C@@H]2O[C@@]3(C)[C@@]4([C@@H](OC(=O)C(C)C)[C@H](OC(C)=O)[C@@]5(C)[C@H](c6ccoc6)CC(=O)[C@@]534)[C@@]21C	2021	New skeletons	Triterpenoids	Trichilia	Viridiplantae
C=C1CC[C@H]2[C@H](C)C(=O)O[C@@H]2[C@@H]2[C@H]1CC(=O)[C@]21CC[C@@]2(O)CCC3=C(CO)C(=O)O[C@@H]3[C@H]3C(=C)C(=O)C1=C32	2021	New sites	Sesquiterpenoids	Ainsliaea	Viridiplantae
C[C@@H]1C2C(=CC[C@]3(C)C2=CC[C@@H]2[C@@]4(C)CCC(=O)C(C)(C)[C@@H]4CC[C@]23C)CC[C@H]1C	2021	New modifications	Triterpenoids	Melaleuca	Viridiplantae
C/C1=C2\CC[C@H](C)[C@@H]2CC[C@@H](C)C2=C1C[C@H]1[C@H](C(C)C)C[C@@H](O)[C@]1(C)C2	2021	New sites	Sesterterpenoids	Aspergillus	Fungi
C[C@@H](O)[C@H](O)/C=C/C=C/C(=O)O[C@@H]1C=C2COC(=O)[C@]2(O)[C@@]2(C)CCCC(C)(C)[C@H]12	2021	New modifications	Sesquiterpenoids	Aspergillus	Fungi
CO[C@H]1[C@H]2[C@@H]([C@@H](OC(C)=O)[C@@H](C)C(=O)[C@@]34C[C@H](C)[C@H](OC(C)=O)[C@]3(/C=C(\C)[C@H]1OC(=O)c1ccccc1)O4)C2(C)C	2021	New modifications	Diterpenoids	Euphorbia	Viridiplantae
C[C@@H]1CC[C@]2(C(=O)O[C@H]3O[C@H](CO)[C@@H](O)[C@H](O)[C@H]3O)CC[C@]3(C)C(=CC[C@@H]4[C@@]5(C)CCC(=O)C(CO)(CO)[C@@H]5CC[C@]43C)[C@@H]2[C@]1(C)O	2021	New modifications	Triterpenoids	Enkianthus	Viridiplantae
C=C1C[C@H]2[C@@]3(C)C(=C(O)C(=O)[C@]2(C)[C@]2(C(=O)OC)C(=O)[C@@H](C)OC(=O)[C@]12C)C(C)(C)C(=O)C1O[C@H]13	2021	New sites	Meroterpenoids	Aspergillus	Fungi
COC(=O)C(C)CC(=O)C[C@@H](C)[C@H]1C[C@@H](O)[C@@]2(C)C3=C(C(=O)C[C@]12C)[C@@]1(C)CCC(=O)[C@@](C)(CO)[C@@H]1C[C@H]3O	2021	New modifications	Triterpenoids	Ganoderma	Fungi
CC(=O)OC(C=C(C)C)C(=O)[C@H](C)[C@H]1CC[C@](C)([C@@H]2CC[C@@H]3[C@]2(C)CC[C@H]2C(C)(C)C(=O)CC[C@]32C)O1	2021	Site combinations	Triterpenoids	Rhabdastrella	Metazoa
C=C1C[C@H](OC(=O)C(C)CC)CC(=C)[C@H](O)C[C@H](O)/C(C)=C\COC1=O	2021	New modifications	Sesquiterpenoids	Calea	Viridiplantae
C/C=C(\C)C(=O)O[C@H]1C[C@@H](OC(C)=O)[C@@]2(C)CO[C@H]3[C@@H](O)[C@@]4(C)C5=C(C)[C@H](C6C=COC6=O)C[C@@H]5O[C@@H](OCC)C[C@@H]4[C@]1(C)[C@@H]32	2021	New modifications	Triterpenoids	Munronia	Viridiplantae
C=C1CCCc2c1ccc1c2C(=O)C(=O)C2=C1OC[C@@H]2C	2021	New modifications	Diterpenoids	Salvia	Viridiplantae
C[C@H]1C[C@@H](C)[C@@](C)(O)[C@H]2C3=CC[C@@H]4[C@@]5(C)CC(=O)[C@@H](O)C(C)(C)[C@@H]5CC[C@@]4(C)[C@]3(C)C[C@@H](O)[C@@]12C(=O)O	2021	New sites	Others	Mesona	Viridiplantae
C[C@]1(CO)CC[C@@]2(CO)C(=C3C=C[C@@H]4[C@@]5(C)CC[C@H](OC(=O)CO)[C@@](C)(CO)[C@@H]5CC[C@@]4(C)[C@]3(C)C[C@@H]2O)C1	2021	New sites	Triterpenoids	Clinopodium	Viridiplantae
C=C(C)[C@H]1C[C@@]23CC=C(C)[C@H]4C[C@H]5C(C)(C)OC(=C(C(=O)C(C)C)C2=O)[C@@]5(O)[C@]43O1	2021	New skeletons	Meroterpenoids	Achyrocline	Viridiplantae
C/C1=C/C[C@@](C)(C(=O)O)/C=C\C[C@@]2(C)O[C@@H]2C[C@H]1O	2021	Site combinations	Sesquiterpenoids	Diaporthe	Fungi
CC(C)=CCC[C@H](C(=O)O)C1CC[C@@]2(C)C3=C(CC[C@]12C)[C@@]1(C)CC[C@H](O)C(C)(C)[C@@H]1CC3	2021	New modifications	Triterpenoids	Laetiporus	Fungi
CC(=O)O[C@@H]1[C@@H]2/C=C(/C)C(=O)C[C@H]3[C@@H](/C=C(/C)C(=O)[C@@]2(O)C[C@H]1C)C3(C)C	2021	New modifications	Diterpenoids	Jatropha	Viridiplantae
CC(C)=CCC[C@@H](C)[C@H]1[C@@H](O)C[C@@]2(C)[C@@H]3CC=C4[C@@H](CC[C@H](O)C4(C)C)[C@]3(C)CC[C@]12C	2021	Site combinations	Triterpenoids	Iberis	Viridiplantae
CC(=O)OCC1=C2[C@@H](OC(=O)C=C(C)C)C[C@H](C)C3=CC(=O)[C@](C)(O3)[C@@H]3O[C@]23OC1=O	2021	New modifications	Sesquiterpenoids	Polydora	Viridiplantae
CC1(C)CCC[C@]2(C)[C@@H]1CC[C@@]13C[C@@H](CC[C@H]12)[C@](C)(O)C3	2021	New modifications	Diterpenoids	Prangos	Viridiplantae
CC1=C/C(=C/[C@@H](C)C(=O)[C@@]2(C)CC[C@]34C[C@]56OC(=O)C[C@H]5O[C@@](C)(CO)[C@@H]6CC[C@@]3(O)C(=O)[C@](O)(C2)O4)OC1=O	2021	Site combinations	Triterpenoids	Schisandra	Viridiplantae
CO[C@@H]1C[C@H](O)C2=C(C[C@H]3[C@H](/C(C)=C\C/C=C(\C)CO)CC[C@@]3(C)O2)C1=O	2021	New sites	Meroterpenoids	Phyllosticta	Fungi
C/C=C(/C)C(=O)O[C@H]1C[C@](C)(O)[C@]23O[C@H]2[C@H](Cl)[C@@](C)(O)[C@@H]3[C@H]2OC(=O)[C@@H](C)[C@H]12	2021	New modifications	Sesquiterpenoids	Achillea	Viridiplantae
C[C@@H](CCCO)[C@@H]1CC[C@]2(C)C3=CC[C@H]4C(C)(C)C(=O)CC[C@]4(C)[C@H]3CC[C@@]12C	2021	New modifications	Triterpenoids	Picrasma	Viridiplantae
Cc1ccc([C@H](C)/C=C/[C@@H](O)C(C)(C)O)c(O)c1	2021	New modifications	Sesquiterpenoids	Plakortis	Metazoa
CC1(C)CCC[C@@]2(C)C1=CC[C@@](C)(O)[C@@H]2C(=O)O	2021	New modifications	Sesquiterpenoids	Phomopsis	Fungi
CC(C)=C(C)CC[C@@H](C(=O)O)[C@H]1CC[C@@]2(C)C3=CC[C@H]4C(C)(C)[C@@H](O)CC[C@]4(C)C3=CC[C@]12C	2021	New modifications	Triterpenoids	Wolfiporia	Fungi
CC(=O)OC[C@H]1O[C@@H](OC(C)(C)[C@@H](O)CC[C@@H](C)[C@H]2CC[C@@]3(C)[C@@H]4[C@@H](O)C[C@H]5C(C)(C)C=CC(=O)[C@@]56C[C@@]46CC[C@]23C)[C@H](O)[C@@H](OC(C)=O)[C@@H]1OC(C)=O	2021	New modifications	Triterpenoids	Lessertia	Viridiplantae
CC(Cl)C(=O)O[C@@]12[C@H](OC(=O)c3ccccc3)[C@@H](C)[C@@]34OC(=O)[C@@]5(C)C([C@H]3[C@@H]1C2(C)C)[C@@H]1C(=O)[C@@H](C)C1C54	2021	New skeletons	Diterpenoids	Euphorbia	Viridiplantae
C=C[C@@]1(C)O[C@]2(C)CC[C@@H]3[C@](C)(CCC[C@@]3(C)CO)[C@H]2C[C@@H]1O	2021	New modifications	Diterpenoids	Blumea	Viridiplantae
C=C(CO)[C@@H]1CC[C@@]2(C)C[C@@H](O)C=C(C=O)[C@@H]2C1	2021	New modifications	Sesquiterpenoids	Aquilaria	Viridiplantae
C=CC1=C2C(=O)OC3C[C@H]4C(C)(C)CCC[C@]4(C)[C@@H](CC1)[C@H]23	2021	Site combinations	Diterpenoids	Erythrophleum	Viridiplantae
C=C1[C@@H]2CC[C@@]3(C)[C@H](C4=C[C@H](O)OC4=O)OC(=O)C[C@]13O[C@H]1CC(=O)C(C)(C)[C@H](CC(=O)OC)[C@]12C	2021	New modifications	Triterpenoids	Khaya	Viridiplantae
CC(=O)O[C@@H]1CC[C@@]2(C)[C@@H](CC[C@]3(C)[C@@H]2C(=O)C=C2[C@@H]4[C@@H](C)[C@H](C)C[C@H](O)[C@]4(C)CC[C@]23C)[C@@]1(C)C(=O)O	2021	Site combinations	Triterpenoids	Boswellia	Viridiplantae
CC(=O)O[C@@H]1C[C@H](OC(=O)c2ccccc2)[C@]2(C)[C@H]3CCO[C@H]4C[C@@H](c5ccoc5)C(C)=C4[C@]3(C)[C@H](O)[C@@H]3OC[C@@]1(C)[C@H]32	2021	New modifications	Triterpenoids	Munronia	Viridiplantae
COC(=O)CC(=O)O[C@H]1CC[C@]2(C)C3=C(CCC2C1(C)C)[C@]1(C)C[C@H]2OC4(CC(C)[C@@H]2[C@@]1(C)CC3)OC(=O)C(C)=C4C	2021	New modifications	Triterpenoids	Hexagonia	Fungi
C=C1[C@H]2C[C@H]2[C@]2(C)C[C@@]3([C@@]45C[C@@]6(C)[C@@H]7C[C@@H]7C(=C)[C@@H]6[C@@H](O)C4=C(C)C(=O)O5)OC(=O)C(C)=C3C[C@@H]12	2021	New sites	Sesquiterpenoids	Lindera	Viridiplantae
CC1=CC2(O)CC[C@H]3C(C)(C)CCCC3(O)C2=CC1=O	2021	New sites	Diterpenoids	Salvia	Viridiplantae
CC(=O)O[C@@H]1[C@H](OC(C)=O)[C@@H]2C(C=CC(=O)C2(C)C)[C@H]2CC[C@]3(C)C(=CC[C@H]3C3=CCOC3=O)[C@]12C	2021	New skeletons	Triterpenoids	Chisocheton	Viridiplantae
CC(=O)OC1CC(O)C2(C)C3CCC4(C)C(O)CCC34C2C1	2021	New skeletons	Diterpenoids	Dictyota	Others
CC1=C2C(=O)OC(C)=C2[C@H]2OC(=O)[C@@H](C)[C@H]2CC1	2021	New sites	Sesquiterpenoids	Artemisia	Viridiplantae
CC(C)=CC[C@H]1C[C@]2(C)C(=O)[C@@]3(CC=C(C)C)OC2(O)[C@](C(=O)C(C)C)(C3=O)C1(C)C	2021	New modifications	Meroterpenoids	Hypericum	Viridiplantae
C=C1C(=O)O[C@@H]2CC(C)=C([C@H](C)CCCO)[C@@H](O)[C@H]12	2021	New modifications	Sesquiterpenoids	Pentanema	Viridiplantae
C=C[C@]1(CO)C[C@]23CC[C@@H](C(=C)C)[C@](C)(CCC(=O)OC)[C@H]2C[C@H]1O3	2021	New sites	Diterpenoids	Callicarpa	Viridiplantae
CC1=C2C[C@]3(C)[C@@H](C)C[C@@H](O)C[C@]3(O)C[C@]2(O)OC1=O	2021	New modifications	Sesquiterpenoids	Ligularia	Viridiplantae
CC(C)/C(=C/C[C@H](C(=O)O)[C@H]1C[C@H](O)[C@@]2(C)C3=C(CC[C@]12C)[C@@]1(C)CCC(=O)C(C)(C)[C@@H]1CC3)CO	2021	Site combinations	Triterpenoids	Laetiporus	Fungi
C=C1[C@H](O)[C@@H](O)CC(C)(C)[C@]12CC=C(COC(C)=O)CC2	2021	New modifications	Sesquiterpenoids	Steccherinum	Fungi
COC(C)(C)/C=C/C=C(\C)[C@H]1CC[C@](C)(NC=O)CC1	2021	New modifications	Sesquiterpenoids	Halichondria	Metazoa
CC(C)=CCC/C(C)=C/C[C@@H](O)/C(C)=C/CC[C@@]1(C)[C@H](CCCO)/C(=C(/C)C=O)CC[C@]1(C)O	2021	New modifications	Triterpenoids	Iris	Metazoa
COC(CC[C@H](C)[C@@H]1CC[C@]2(C)C3=CC[C@H]4C(C)(C)C(=O)CC[C@]4(C)[C@H]3CC[C@@]12C)OC	2021	New modifications	Triterpenoids	Picrasma	Viridiplantae
C=C1C(=O)O[C@@H]2CC(C)=C([C@@H](C)CCCOC(C)=O)[C@@H](OC(=O)Cl)[C@H]12	2021	New modifications	Sesquiterpenoids	Pentanema	Viridiplantae
C=C1C(=O)O[C@H]([C@H]2C(=O)C=C[C@@]2(C)O)[C@H]1CCC(C)=O	2021	New modifications	Sesquiterpenoids	Chrysanthemum	Viridiplantae
C[C@H](C1OC(C)(C)C(O)C1O)C1CC[C@]2(C)C3=CCC4C(C)(C)[C@H](O)CC[C@]4(C)C3CC[C@@]12C	2021	New modifications	Triterpenoids	Undefined	Others
CC1O[C@H](O[C@H]2C(O[C@@H]3OC(CO)[C@H](O)C(O)[C@@H]3O)C(C(=O)O)O[C@H](O[C@H]3CC[C@@]4(C)C(CC[C@]5(C)C4CC=C4C6CC(C)(C)CC[C@]6(C(=O)O[C@H]6OCC(O)[C@H](O)C6OC6O[C@H](C)C(O[C@@H]7OC[C@@H](O)C(O)[C@@H]7O)[C@@H](O[C@@H]7OC(CO)C(O)[C@H](O)[C@@H]7O)[C@@H]6O)CC[C@]45C)[C@]3(C)C=O)C2O)C(O)[C@H](O)[C@@H]1C	2021	New modifications	Triterpenoids	Hylomecon	Viridiplantae
C=C1C[C@@H](OC(=O)/C(C)=C\C)C2C(=C)C(=O)OC2[C@H](O)[C@@]2(C)OC1C[C@@H]2O	2021	New modifications	Sesquiterpenoids	Calea	Viridiplantae
CC(C)=CCCC1(C)OC2(C)C=CC1CC2	2021	New modifications	Sesquiterpenoids	Lychnophora	Viridiplantae
C=C(C)[C@@H]1CC[C@]2(C(=O)O)CC[C@]3(C)C(CCC4[C@@]5(C)CC[C@H](O)C(C)(C)C5CC[C@]43C)C12	2021	New modifications	Triterpenoids	Syzygium	Viridiplantae
CC(C)c1cc2c(c(O)c1O)[C@@]1(C)CCC[C@](C)(CO)C1=C(O)C2=O	2021	Site combinations	Diterpenoids	Salvia	Viridiplantae
COC(=O)C[C@H]1C(C)(C)OC(=O)C=C2O[C@@]3(C)[C@@]4([C@@H](O)[C@H](OC(C)=O)[C@@]5(C)[C@H](C6=CCOC6=O)CC(=O)[C@@]534)[C@@]21C	2021	New skeletons	Triterpenoids	Trichilia	Viridiplantae
CC(C)c1c(O)c(C=O)c2c(c1O)OC(O)[C@H]1C(C)(C)CCC[C@]21C	2021	New sites	Diterpenoids	Salvia	Viridiplantae
C[C@@]1(CO)C[C@H]2C[C@@]3(C)C(=O)[C@](CO)(C[C@@H]3O)[C@H]2C1	2021	New sites	Sesquiterpenoids	Daedaleopsis	Fungi
COC(C)(C)/C=C/C[C@](C)(O)[C@H]1CC[C@]2(C)C1[C@H](O)CC1[C@@]3(C)CCC(O[C@@H]4O[C@H](CO)[C@@H](O)[C@H](O)[C@H]4O[C@@H]4O[C@H](CO)[C@@H](O)[C@H](O)[C@H]4O)C(C)(C)C3CC[C@]12C	2021	New modifications	Triterpenoids	Panax	Viridiplantae
C=C[C@@]1(C)CC(=O)C2=C([C@H]1O)[C@@]1(O)OC[C@@]23CCCC(C)(C)[C@@H]3[C@H]1O	2021	Site combinations	Diterpenoids	Aspergillus	Fungi
CC(C)[C@@H]1CC[C@]2(C)[C@H]3CC[C@]2(C)[C@H](OC(=O)/C=C/c2ccc(O)cc2)[C@@H]13	2021	New modifications	Sesquiterpenoids	Pilea	Viridiplantae
C=C1CCC2[C@]3(C)CC[C@H](O)C(C)(C)O[C@@H]3CC[C@]2(C)[C@@H]1Cc1c(O)c(C)c(C)oc1=O	2021	New modifications	Meroterpenoids	Mariannaea	Fungi
C=C1CCC(C)=C1C[C@@H](CC[C@H](C)OC=O)C(=C)C(=O)O	2021	New skeletons	Sesquiterpenoids	Artemisia	Viridiplantae
CC(=O)OCC12C[C@H]3C(=O)C(C)(C)C[C@H]3[C@]1(C)C(=O)[C@@]1(O)C[C@H](C)[C@H](OC(=O)c3ccccc3)[C@@H]1[C@H]2OC(C)=O	2021	New modifications	Diterpenoids	Euphorbia	Viridiplantae
COC(=O)C1=CO[C@@H](O[C@H]2OC[C@@H](O)[C@@H](O)[C@@H]2O)[C@@H]2C(CO[C@@H]3OC[C@@H](O)[C@H](O)[C@H]3O)=CC[C@H]12	2021	New modifications	Monoterpenoids	Gardenia	Viridiplantae
CC(C)=CCC/C(C)=C/C[C@]1(O)C(=O)C2=C(COC2)C[C@@H]1O	2021	New sites	Meroterpenoids	Dentipellis	Fungi
C/C=C\C(=O)O[C@@H]1C[C@@H]2O[C@@H]3C=C(C)[C@@H](OC)[C@@H]4OCC2(O)[C@@]1(C)[C@]34C	2021	New modifications	Sesquiterpenoids	Trichothecium	Fungi
C[C@H]1C[C@@H](C[C@@](C)(O)[C@H]2C[C@H](O)[C@@]3(C)C4=C(C(=O)C[C@]23C)[C@@]2(C)CCC(=O)C(C)(C)[C@@H]2CC4=O)OC1=O	2021	New modifications	Triterpenoids	Ganoderma	Fungi
COC(=O)C1=CCC[C@H]2[C@@]1(C(=O)O)CC[C@@H](C)[C@]21C[C@@H](c2ccoc2)OC1=O	2021	New modifications	Diterpenoids	Croton	Viridiplantae
CO[C@@]12C[C@H]3[C@@H](CC[C@H]4C(C)(C)CCC[C@]34C)[C@@H](C)C1=CC(=O)O2	2021	New modifications	Diterpenoids	Caesalpinia	Viridiplantae
CC1=C2CC[C@](C)(OO)/C=C/C[C@@]3(C)O[C@@H]3CC/C(C)=C/[C@@H]2OC1=O	2021	New modifications	Diterpenoids	Sarcophyton	Viridiplantae
C[C@H]1C(=O)O[C@@]2(O)C[C@@]3(C)O[C@@]12C(=O)[C@@]12O[C@]1(C)CC[C@H]23	2021	Site combinations	Sesquiterpenoids	Chloranthus	Viridiplantae
C/C(=C/CC[C@@H](C)[C@H]1CC[C@@]2(C)[C@@H]3CC[C@@H](C(C)(C)O)[C@@]4(CCC(=O)O4)C[C@H]3CC[C@]12C)C(=O)O	2021	Site combinations	Triterpenoids	Schisandra	Viridiplantae
CC[C@@H](C)[C@@H](OC(C)=O)[C@@H](C)c1c(O)c2c(c3c1S[C@@H](OC)C(=O)N3)[C@@H](O)[C@H]1[C@@](C)(CC[C@H]3O[C@@H](C(C)(C)O)CC[C@]13C)O2	2021	New modifications	Meroterpenoids	Bipolaris	Fungi
C=C1CC=C[C@]2(C)C[C@@]3(C45C[C@]6(C)[C@@H](CC4=C(C)C(=O)O5)C(=C)[C@H]4C[C@H]46)OC(=O)C(C)=C3C[C@@H]12	2021	New skeletons	Sesquiterpenoids	Lindera	Viridiplantae
CC1=C[C@H](OC(=O)c2occc2C)OC1=O	2021	Site combinations	Monoterpenoids	Elsholtzia	Viridiplantae
COC(=O)[C@H]1CC[C@@]2(C)C(CC[C@]3(C)C2CCC2C4[C@H](C)C(C)=CC[C@]4(C)CC[C@]23C)C1(C)C	2021	New sites	Triterpenoids	Pulicaria	Viridiplantae
CC1=C2C(=O)C[C@H](CO)[C@]23CC[C@@H]([C@H]3O)C1(C)C	2021	New sites	Sesquiterpenoids	Aquilaria	Viridiplantae
C[C@H]1CCC2=C(CO)[C@@](C)(CO)[C@H]3CC[C@]21C3	2021	New sites	Sesquiterpenoids	Aquilaria	Viridiplantae
COC(=O)[C@]12[C@@H]3[C@@H](O)O[C@@H](C)[C@@]14OC(=O)[C@]3(C)C[C@H]1C(C)=C3CC(=O)OC(C)(C)[C@@]35O[C@H]5[C@H](O4)[C@@]12C	2021	New sites	Meroterpenoids	Talaromyces	Fungi
C=C1CC[C@H]2[C@@](C)(C(=O)OC)CCC[C@]2(C)[C@H]1CCC1=CCOC1=O	2021	New modifications	Diterpenoids	Platycladus	Viridiplantae
C=C1CC[C@H]2[C@@](C)(C(=O)O)CCC[C@]2(C)[C@H]1CCc1ccoc1	2021	New modifications	Diterpenoids	Platycladus	Viridiplantae
CC1(C)CCC[C@@]2(C)[C@H]1CC=C1C[C@H](C3=CCOC3=O)C[C@@H]12	2021	Site combinations	Diterpenoids	Boesenbergia	Viridiplantae
C=C[C@@]1(C)CC=C2C(CC[C@@H]3[C@@](C)(O)CCC[C@@]23C)C1	2021	New modifications	Diterpenoids	Aralia	Viridiplantae
CO[C@H]1C[C@@H](O)C(=O)C2=C1O[C@H]([C@@](C)(O)CCC=C(C)C)C2	2021	Site combinations	Meroterpenoids	Phyllosticta	Fungi
C=C1[C@H](OC(=O)c2ccccc2)C[C@@H](OC(C)=O)C(C)(C)/C=C\[C@H](C)C(=O)[C@@]2(OC(C)=O)C[C@H](C)[C@H](OC(C)=O)[C@@H]2[C@H]1OC(C)=O	2021	New modifications	Diterpenoids	Euphorbia	Viridiplantae
C=C[C@@H]1CC(C)(C)C/C1=C1/[C@@H]2CC(=O)O[C@H]2O[C@H]1OC	2021	New modifications	Sesquiterpenoids	Irpex	Fungi
C[C@H]1COC(c2cc3c(cn2)OC(C)(C)C=C3)=CC1=O	2021	New skeletons	Meroterpenoids	Beauveria	Fungi
CC(CCC(=O)C(C)(C)O)[C@@H]1CC[C@@]2(C)C3=C(CC[C@]12C)[C@@]1(C)C[C@@H](O)[C@H](O)C(C)(C)C1CC3	2021	New modifications	Triterpenoids	Inonotus	Fungi
C=C[C@H]1[C@H](O[C@@H]2O[C@H](CO)[C@@H](O)[C@H](O)[C@H]2O[C@@H]2C[C@@H]3C(C(=O)OC)=CO[C@@H](O[C@@H]4O[C@H](CO)[C@@H](O)[C@H](O)[C@H]4O)[C@@H]3[C@H](C)O2)OC=C(C(=O)OC)[C@H]1CCOC(=O)c1cc(O)c(O)c(O)c1	2021	New modifications	Monoterpenoids	Cornus	Viridiplantae
CCCCCC(=O)c1c(O)c(C)c(O)c2c1O[C@H]1C/C=C\C(C)(C)C/C=C(/C)CC[C@@H]1C2	2021	New skeletons	Meroterpenoids	Psidium	Viridiplantae
C[C@@]12CC[C@]3(C(=O)O[C@@H]4O[C@H](CO)[C@@H](O)[C@H](O)[C@H]4O)C(=C1CCC1[C@@]4(C)C[C@@H](O)[C@H](O)[C@@](C)(CO)C4CC[C@]12C)CCC[C@@]3(C)CO	2021	New sites	Triterpenoids	Potentilla	Viridiplantae
CC(C)[C@@]12CC3=C([C@@H](CO1)O2)[C@@]1(C)CCCC(C)(C)[C@@H]1CC3	2021	New sites	Diterpenoids	Kaempferia	Viridiplantae
C=C1C[C@@H](O)/C=C(\C)CC[C@@H]2/C(=C/C=C/C(C)(C)OC)C(=O)OC[C@@H]12	2021	New modifications	Diterpenoids	Asterospicularia	Metazoa
CC1=CC[C@H]([C@@H](C)[C@H]2CC[C@@]3(C)[C@@H]4CC[C@@H](C(C)(C)O)[C@@]5(CCC(=O)O)C[C@@]45CC(=O)[C@]23C)OC1=O	2021	Site combinations	Triterpenoids	Schisandra	Viridiplantae
COc1cc([C@@H]2c3cc4c(cc3CC3COC(=O)C32)OCO4)cc(OC)c1OC	2021	New sites	Diterpenoids	Salvia	Viridiplantae
CCC(O)CC(=O)O[C@H]1C[C@@H]2[C@@]3(C)CCC[C@@]4(C[C@@H]4C)[C@@H]3CC[C@@]2(C)C2=CCC3=C(C(=O)O[C@@]3(C)O)[C@]21C	2021	New modifications	Sesterterpenoids	Dysidea	Metazoa
CC(C)(O)/C=C/C[C@](C)(O[C@H]1OC(CO[C@H]2OC[C@@H](O)C(O)[C@H]2O)[C@@H](O)C(O)[C@H]1O)[C@H]1CC[C@]2(C)C1[C@@H](O)CC1[C@@]3(C)CC[C@@H](O[C@H]4OC(CO)[C@@H](O)C(O)[C@H]4O[C@H]4OC(CO)[C@@H](O)C(O)[C@H]4O[C@H]4OC[C@@H](O)C(O)[C@H]4O)C(C)(C)C3CC[C@]12C	2021	New modifications	Triterpenoids	Panax	Viridiplantae
C=C(C)[C@H](O)CC[C@@](C)(O[C@H]1O[C@H](CO[C@H]2O[C@H](CO)[C@@H](O[C@H]3O[C@H](CO)[C@@H](O)[C@H](O)[C@H]3O)[C@H](O)[C@H]2O)[C@@H](O)[C@H](O)[C@H]1O)[C@H]1CC[C@]2(C)C1[C@H](O)CC1[C@@]3(C)CC[C@H](O)C(C)(C)C3CC[C@]12C	2021	New modifications	Triterpenoids	Gynostemma	Viridiplantae
C=C1CO[C@@]2(O)C=C3C(=O)CC[C@H](C)[C@@]3(C)C[C@@]12O	2021	New modifications	Sesquiterpenoids	Septoria	Fungi
C/C1=C/CCC(C)(C)C[C@H]2OC(=O)[C@@H](C)C2CC1O[C@H]1O[C@H](CO)[C@H](O)[C@@H](O)[C@H]1O	2021	New skeletons	Sesquiterpenoids	Asteriscus	Viridiplantae
C[C@@H]1CC[C@]2(C(=O)O)CC[C@]3(C)C(=CC[C@@H]4[C@@]5(C)CC[C@@H](O)[C@@](C)(CO)[C@@H]5[C@H](O)C[C@]43C)[C@@H]2[C@]1(C)O	2021	New modifications	Triterpenoids	Enkianthus	Viridiplantae
C=C(C)C(C)(C)CC[C@@H](C)[C@H]1CC[C@@]2(C)[C@@H]3CC[C@@H]4C(C)(C)C(=O)CC[C@@]4(C)C3=CC[C@]12C	2021	New modifications	Triterpenoids	Euonymus	Viridiplantae
C/C=C\C(=O)O[C@@H]1C[C@@H]2O[C@@H]3[C@H](O)C(C)C[C@@H]4OCC2(O)[C@@]1(C)[C@@]43C	2021	New modifications	Sesquiterpenoids	Trichothecium	Fungi
C=C(C)[C@@H]1CC[C@@]2(O)CC[C@]3(C)[C@H](CC[C@@H]4[C@@]5(C)CCC(=O)C(C)(C)[C@@H]5CC[C@]43C)[C@@H]1O2	2021	New skeletons	Triterpenoids	Liquidambar	Viridiplantae
C=C1CC[C@H]2[C@@](C)(CC[C@@H](O)[C@@]2(C)CO)[C@@H]1C/C=C1/C(=O)OC[C@H]1O	2021	New modifications	Diterpenoids	Andrographis	Viridiplantae
C=C[C@@]1(C)CCC2=C(C[C@@H](O)[C@H]3C(C)(C)CC[C@H](O)[C@]23C)[C@@H]1O	2021	New modifications	Diterpenoids	Kaempferia	Viridiplantae
C=C(C(=O)OC)[C@@]1(O)C[C@H]2[C@@H](C)CC[C@H]2C(C)=CC1=O	2021	New modifications	Sesquiterpenoids	Stellera	Viridiplantae
CC1=CC[C@H]([C@](C)(O)[C@H]2CC[C@@]3(C)[C@@H]4CC[C@@H](C(C)(C)O)/C(=C\CC(=O)O)CC4=CC(=O)[C@]23C)OC1=O	2021	New modifications	Triterpenoids	Schisandra	Viridiplantae
CC(C)=CCCC(C)[C@H]1CC[C@@]2(C)[C@@H]3CC[C@H]4C(C)(C)[C@@H](O)C=C[C@@]45C[C@@]35CC[C@]12C	2021	New modifications	Triterpenoids	Euphorbia	Viridiplantae
C=C1[C@@H](OC(=O)c2ccccc2)C[C@H]2[C@H](/C=C(\C)C(=O)[C@@]3(OC(C)=O)C[C@H](C)[C@H](OC(=O)c4ccccc4)[C@@H]3[C@H]1OC(C)=O)C2(C)C	2021	New modifications	Diterpenoids	Euphorbia	Viridiplantae
CC1=CC(=O)C2=C(C)CC[C@@H]3[C@H](C)C(=O)O[C@H]3C12	2021	New modifications	Sesquiterpenoids	Achillea	Viridiplantae
COC(=O)[C@H](C)[C@@]1(O)C[C@@H]2C(=C(C)CC1=O)CC[C@@H]2C	2021	New modifications	Sesquiterpenoids	Stellera	Viridiplantae
CC(=O)O[C@H]1[C@H]2[C@@H](OC(=O)c3ccoc3)[C@H](OC(=O)c3ccoc3)[C@]3(COC(=O)C(C)C)[C@@H](OC(=O)c4cccnc4)[C@@H](O)C[C@](C)(O)[C@@]13OC2(C)C	2021	New modifications	Sesquiterpenoids	Tripterygium	Viridiplantae
CC(=O)O[C@H]1CC[C@@H](O[C@@H]2O[C@H](CO)[C@@H](O)[C@H](O)[C@H]2O)[C@H]2CC[C@@]3(O)C(=O)O[C@H](c4ccoc4)C[C@@]3(C)[C@H]12	2021	New modifications	Diterpenoids	Tinospora	Viridiplantae
CC1=C2C[C@H]3C(=O)C[C@@H]4C(C)(C)[C@H](O)CC[C@@]4(C)[C@@H]3C=C2OC1=O	2021	New modifications	Diterpenoids	Euphorbia	Viridiplantae
CC1=C2[C@H](O)[C@H](O)[C@](C)(O)[C@@H]2[C@@H](O)C2=C(C)C(=O)O[C@H]2C1	2021	New modifications	Sesquiterpenoids	Salvia	Viridiplantae
C=C(CC[C@@H](C(=O)O)[C@H]1CC[C@@]2(C)C3=CC[C@H]4C(C)(C)[C@H](OC=O)CC[C@]4(CC)C3=CC[C@]12C)C(C)C	2021	New skeletons	Triterpenoids	Taiwanofungus	Fungi
COC(C)(C)[C@@H](O)CC[C@@H](C)[C@H]1CC[C@@]2(C)[C@@H]3CC[C@H]4C(C)(C)[C@@H](O)CC[C@@]45C[C@@]35CC[C@]12C	2021	New modifications	Triterpenoids	Chrysanthemum	Viridiplantae
C[C@]1(OC(=O)CCc2ccc(O)cc2)CO[C@@]2(C[C@@H]([C@@H]3CC[C@]45C[C@]34C=C[C@@H]3[C@@]4(C)CC=C6C[C@@H](c7ccccc7)OC[C@]6(C)[C@@H]4CC(=O)[C@]35C)C(=O)O2)[C@@H]1O	2021	New modifications	Triterpenoids	Dichapetalum	Viridiplantae
C[C@@H]1C[C@@H](O)C=C(C=O)[C@@]12CC[C@@H](C(C)(C)O)C2	2021	New modifications	Sesquiterpenoids	Aquilaria	Viridiplantae
CC1=CC(=O)C2=C(O)[C@@]3(C[C@H]3C(C)(C)O)[C@@H](O)[C@H](O)[C@H]2C1	2021	New skeletons	Meroterpenoids	Biscogniauxia	Fungi
C=C(C)[C@@H]1CC[C@]2(C)C([C@H](O[C@@H]3O[C@@H](C)[C@@H](O)[C@H](O)[C@@H]3O)CC3C([C@@](C)(O)C/C=C/C(C)(C)OC)CC[C@]32C)[C@@]1(C)CCC(=O)OC	2021	Site combinations	Triterpenoids	Cyclocarya	Viridiplantae
C=C[C@@]1(C)CC[C@@H]2[C@@H]1C[C@@H]1[C@@H]2[C@H](O[C@H]2[C@@H](O)[C@@H](O)[C@H](O)[C@H]2CO)[C@H]2CCCN(C2)[C@@H]1C	2021	New skeletons	Triterpenoids	Aconitum	Viridiplantae
C[C@H]1CC[C@]2(C)CC[C@]34C[C@]3(CCC3[C@@]5(C)CCC(=O)C(C)(C)C5CC[C@]34C)C2[C@@H]1C	2021	New modifications	Triterpenoids	Phyllanthus	Viridiplantae
C[C@H](CO)[C@@H]1CC[C@]2(C)[C@@H](CC[C@@]2(O)CO)[C@H]1CO	2021	Site combinations	Sesquiterpenoids	Dendrobium	Viridiplantae
C=C(C)[C@@H]1CC[C@@](C)(O)[C@]2(O)CC(=O)C(C)=C2C1	2021	New modifications	Sesquiterpenoids	Stellera	Viridiplantae
CC[C@@]1(C)CCC[C@]2(C)OC3=C(C=C[C@@H]12)C(=O)C(C(C)C)=C(O)C3=O	2021	New skeletons	Diterpenoids	Salvia	Viridiplantae
C[C@@H]1CO[C@@H](O[C@H]2[C@H](CO)O[C@@H](O[C@H]3CC[C@@]4(C)C(CC[C@]5(C)C4CC=C4C6CC(C)(C)C(=O)C[C@]6(C(=O)O)CC[C@]45C)C3(C)C)[C@@H](O[C@@H]3OC[C@@H](O[C@@H]4OC[C@H](O)[C@@H](O)[C@H]4O)[C@H](O[C@@H]4O[C@H](CO)[C@H](O)[C@H](O)[C@H]4O)[C@@H]3O)[C@H]2O)[C@@H](O)[C@H]1O	2021	Site combinations	Triterpenoids	Senegalia	Viridiplantae
CO[C@@H](/C=C\[C@H](C)[C@H]1CC[C@]2(C)C[C@H]3[C@@H]4/C(=C\CC12)C(=O)O[C@]4(O)C[C@@]3(C)O)C(C)(C)O	2021	New modifications	Sesterterpenoids	Aspergillus	Fungi
CC(C)C(=O)c1c(O)c2c(c3c1OC1(O)C(C(=O)C(C)(C)C(=O)C1(C)C)C3C(C)C)OC1=C(C(=O)C(C)(C)C(=O)C1(C)C)C2C(C)C	2021	New skeletons	Diterpenoids	Tripterygium	Viridiplantae
C=C(C)[C@@H](O)CC[C@@H](C)[C@H]1[C@H](O)C[C@@]2(C)[C@@H]3CC[C@H]4C(C)(C)[C@@H](O)CC[C@]4(O)CC3=CC[C@]12C	2021	Site combinations	Triterpenoids	Lepidozia	Viridiplantae
C[C@@H]1C(=O)CC[C@H]2C3=CC[C@@]4(C)C5CC(C)(C)CC[C@]5(C)CC[C@]4(C)[C@H]3CC[C@]12C	2021	New modifications	Triterpenoids	Putranjiva	Viridiplantae
Cc1cc(OC2OC(CO)[C@@H](O)C(O)[C@@H]2O)c(C(C)C)c(O)c1OC1OC(COC2OC(C)C(O)C(O)C2O)[C@@H](O)C(O)[C@@H]1O	2021	New modifications	Monoterpenoids	Cruciata	Viridiplantae
C/C=C1/C[N+]2([O-])[C@@H]3C[C@H]1C1(C(=O)OC)[C@H](C)[C@@]4(C[C@H]12)c1cccc(O[C@@H]2C[C@H](CO)[C@@H](O)[C@H](O)[C@H]2O)c1C[C@@H]34	2021	New sites	Others	Gardneria	Viridiplantae
CC(=O)O[C@@H]1[C@H]2[C@@H](OC(=O)c3ccccc3)[C@@H](C)C[C@]2(O)C(=O)[C@@]2(C)[C@@H]3CC(C)(C)C(=O)[C@]3(OC(C)=O)C[C@@]12C	2021	New modifications	Diterpenoids	Euphorbia	Viridiplantae
C=C(C)[C@@H]1CC[C@@]2(C)C3CCC4[C@](C)(CC[C@H]5C(C)(C)[C@H](OC)CC[C@]45C)[C@@]3(C)CC[C@@H]12	2021	New modifications	Triterpenoids	Acrocomia	Viridiplantae
COc1cc(O)c(C(=O)/C=C/c2ccccc2)c2c1[C@]1(C)CC[C@]3(C(C)C)O[C@@H]3[C@@H]1O2	2021	New skeletons	Meroterpenoids	Sarcandra	Viridiplantae
C=C1[C@@H]2CC[C@@]3(C)[C@H](C4=CC(=O)OC4O)OC(=O)C[C@]13O[C@H]1CC(=O)C(C)(C)[C@H](CC(=O)OC)[C@]12C	2021	New modifications	Triterpenoids	Khaya	Viridiplantae
C=C(C)[C@@H]1CC=C2[C@H](CC[C@@]3(C)[C@H]([C@H](CC(=O)C=C(C)C)C(=O)OC)CC[C@]23C)[C@@]1(C)CCC(=O)OC	2021	New modifications	Triterpenoids	Entandrophragma	Viridiplantae
Cc1cc(OC2OC(CO)[C@@H](O)C(O)[C@@H]2OC2OC(CO[C@H]3OC(C)[C@H](O)C(O)[C@H]3O)C(O)C(O)[C@@H]2O)c(C(C)C)c(O)c1OC1OC(CO)[C@@H](O)C(O)[C@@H]1O	2021	New modifications	Monoterpenoids	Cruciata	Viridiplantae
COC(=O)C(C)CC(=O)C/C(C)=C1/C[C@@H](O)[C@@]2(C)C3=C(C(=O)C[C@]12C)[C@@]1(C)CC[C@H](O)C(C)(C)[C@@H]1C[C@@H]3C	2021	New sites	Triterpenoids	Ganoderma	Fungi
CC(=O)OC(C=C(C)C)C(=O)[C@H](C)[C@H]1CC[C@](C)([C@@H]2CC[C@@H]3[C@]2(C)CC[C@H]2C(C)(C)[C@@H](O)CC[C@]32C)O1	2021	Site combinations	Triterpenoids	Rhabdastrella	Metazoa
C/C(=C\C(=O)O)C[C@H](O)[C@@]1(C)[C@H](C)CC[C@@]2(O)C(=O)CC[C@]3(OC(=O)CC[C@@H]21)C(=O)CC[C@@H]1[C@@](C)([C@@H](O)C/C(C)=C/C(=O)O)[C@H](C)CC[C@]13C	2021	New skeletons	Diterpenoids	Isodon	Viridiplantae
CC(CO)C1=C2[C@H]3C[C@H]4O[C@](O)([C@@H](O)[C@H]4CO)[C@]3(C)CC[C@@]2(C)CC1	2021	New modifications	Diterpenoids	Cyathus	Fungi
C=C(CC[C@@H](C)[C@H]1CC[C@@]2(C)C3=C(CC(=O)[C@]12C)[C@@]1(C)CC[C@H](O)C(C)(C)[C@@H]1CC3)C(C)C(=O)O	2021	New modifications	Triterpenoids	Fomitopsis	Fungi
C=C1C(=O)O[C@H]([C@@H]2C(=O)C=C[C@]2(C)O)[C@H]1CCC(C)=O	2021	New modifications	Sesquiterpenoids	Chrysanthemum	Viridiplantae
COC1=CC(C)(C)C2CC[C@]3(C)C(CC=C4C5[C@](C(=O)O)(CC[C@H](C)[C@@]5(C)O)CC[C@]43C)[C@@]12C	2021	New sites	Triterpenoids	Lavandula	Viridiplantae
C/C(=C\C(=O)C[C@H](C)C(=O)O)C1CC(=O)[C@@]2(C)C3=C(C(=O)[C@H](O)[C@]12C)[C@@]1(C)CC[C@H](O)C(C)(C)[C@@H]1C[C@@H]3O	2021	New modifications	Triterpenoids	Ganoderma	Fungi
CC(=O)O[C@H]1CCC(C)(C)[C@]2(O)[C@@H](OC(C)=O)[C@H](O)[C@@H]3[C@H](Cc4occc4[C@]3(O)CO)[C@@]12C	2021	New modifications	Diterpenoids	Guilandina	Viridiplantae
C=C(CCC[C@H]1CC[C@H]2C3=C(C(=O)[C@H](O)[C@]12C)[C@@]1(C)CC[C@@H](O)[C@@H](C)[C@@H]1C[C@H]3O)C(C)C(=O)O	2021	New skeletons	Triterpenoids	Taiwanofungus	Fungi
CC(C)=CCC[C@@](C)(O[C@H]1O[C@H](CO[C@H]2OC[C@@H](O)[C@H](O)[C@H]2O)[C@@H](O)[C@H](O)[C@H]1O)[C@H]1CC[C@]2(C)C1[C@H](O)CC1[C@@]3(C)C[C@@H](O)[C@H](O)C(C)(C)C3CC[C@]12C	2021	New modifications	Triterpenoids	Gynostemma	Viridiplantae
CC(=O)O[C@H]1C[C@@H](C(=O)O[C@@H]2O[C@H](CO)[C@@H](O)[C@H](O)[C@H]2O)[C@H]2C(=O)C[C@H]3C(=O)O[C@H](c4ccoc4)C[C@@]3(C)[C@@H]2C1	2021	New modifications	Diterpenoids	Dioscorea	Viridiplantae
CC1=C2C[C@H](O)[C@H](O)[C@@]2(C)C[C@H](C(C)(C)O)CC1	2021	New modifications	Sesquiterpenoids	Cinnamomum	Viridiplantae
CC(C)(O)[C@@H](O)C(=O)/C=C1\C(=O)CC[C@@]2(C)[C@@]1(O)CC[C@H]1Cc3c([nH]c4ccccc34)[C@@]12C	2021	New skeletons	Meroterpenoids	Penicillium	Fungi
CC1(C)CC2C3=CCC4[C@@]5(C)CC[C@H](O[C@@H]6O[C@@H](CO[C@@H]7OC[C@@H](O)[C@@H](O)[C@@H]7O[C@@H]7O[C@H](CO)[C@@H](O)[C@H](O)[C@H]7O)[C@@H](O[C@@H]7OC[C@@H](O)[C@H](O)[C@H]7O)[C@H](O)[C@@H]6O[C@@H]6OC[C@@H](O)[C@H](O)[C@@H]6O)C(C)(C)C5CC[C@@]4(C)[C@]3(C)CC[C@@]2(C(=O)O)C[C@@H]1O	2021	Site combinations	Triterpenoids	Senegalia	Viridiplantae
C/C=C(\C)C(=O)O[C@H]1C[C@@H](OC(C)=O)[C@@]2(C)CO[C@H]3[C@@H](O)[C@@]4(C)C5=C(C)[C@H](C6C=COC6=O)C[C@@H]5O[C@@H](O)C[C@@H]4[C@]1(C)[C@@H]32	2021	New modifications	Triterpenoids	Munronia	Viridiplantae
C/C(=C\CC[C@@H](C)[C@H]1CC[C@@]2(C)[C@@H]3CC[C@H]4C(C)(C)C(=O)CC[C@@]45C[C@@]35CC[C@]12C)C(=O)O	2021	New modifications	Triterpenoids	Abies	Viridiplantae
COC(=O)[C@@]12C(O)=C(C)C(=O)[C@]1(C)C(C)=C[C@@H]1[C@]2(C)CC[C@@H]2C(C)(C)[C@@H](O)[C@@H](O)C[C@]21C	2021	New sites	Meroterpenoids	Penicillium	Fungi
CC(C)C1OCC(C)(C(=O)O)C1C(=O)O	2021	New skeletons	Monoterpenoids	Limonium	Viridiplantae
CC1(C)CCC[C@@]2(C)[C@H]1[C@@H](O)C=C1COC(=O)[C@@]12O	2021	New modifications	Sesquiterpenoids	Aspergillus	Fungi
COC(=O)C1=CC(=O)C=C2[C@@]1(C(=O)OC)CC[C@@H](C)[C@]21C[C@@H](C2=CC(=O)O[C@@H]2O)OC1=O	2021	New modifications	Diterpenoids	Croton	Viridiplantae
CC(=O)O[C@@H]1CC[C@@]2(C)C(C[C@H](O)[C@]3(C)C2CCC2C([C@]4(C)CCC(=O)O4)CC[C@]23C)C1(C)C	2021	Site combinations	Triterpenoids	Cryptothecia	Fungi
CC1(C)C(=O)[C@@H]2C[C@@]34C[C@@H](CC[C@H]3[C@]2(C)[C@@H](O)C[C@@H]1O)[C@](C)(O)C4	2021	New skeletons	Diterpenoids	Rhododendron	Viridiplantae
CCCCCCCC(=O)O[C@@]12C[C@@H](C)[C@]3(O)[C@@H]4C=C(C)C(=O)[C@@]4(O)C=C(CO)[C@H](OO)[C@H]3[C@@H]1C2(C)C	2021	New modifications	Diterpenoids	Wikstroemia	Viridiplantae
C=C1C(=O)O[C@@H]2[C@@H]3C(=C[C@H](O)[C@@]3(C)O)[C@](C)(O)C[C@H](OC(=O)CC)[C@@H]12	2021	New modifications	Sesquiterpenoids	Artemisia	Viridiplantae
CC(=O)/C=C/c1ccc(=O)c(O)cc1C(C)C	2021	New skeletons	Sesquiterpenoids	Juniperus	Viridiplantae
CC(C)(O)[C@H](O)CC[C@H](C(=O)O)[C@@H]1CC[C@]2(C)C3=C(CC[C@@]12C)[C@@]1(C)CCC(=O)C(C)(C)[C@@H]1CC3	2021	New modifications	Triterpenoids	Boswellia	Viridiplantae
C[C@@]1(O)C2CCC3(CC[C@H]4C5(CCC[C@@]4(C)CN(CCO)C5)C3C2)[C@@H]1O	2021	Site combinations	Diterpenoids	Aconitum	Viridiplantae
CC1(C)CCC[C@@]2(C)[C@H]1[C@H](O)C=C1COC(=O)[C@@]12O	2021	New modifications	Sesquiterpenoids	Aspergillus	Fungi
C[C@H]1CC[C@@H]2C(=O)C[C@@H]3C(=C[C@@]4(C)[C@H](O)C[C@]5(C)CCC(C)(C)[C@@H]5[C@@H]34)[C@]12C	2021	New skeletons	Sesterterpenoids	Penicillium	Fungi
O=C(CCc1ccccc1)CCc1ccccc1O	2021	New skeletons	others	Aquilaria	Viridiplantae
CC(=O)O[C@@H]1C[C@H](C)[C@@]2(C)C[C@@]3(C4=CC(=O)OC4O)OC[C@]14C2(CC[C@@H]1O[C@@]14C)O3	2021	Site combinations	Diterpenoids	Scapania	Viridiplantae
CC1(C)Oc2ccc(C(=O)O)cc2[C@@H](O)[C@H]1O	2021	New sites	Meroterpenoids	Biscogniauxia	Fungi
CC1(C)C(=O)C=C[C@]2(C)C3=CC[C@@]4(C)C(C5=CC(=O)O[C@@H]5O)CC(=O)[C@H]4[C@]3(C)C(=O)C[C@@H]12	2021	New modifications	Triterpenoids	Toona	Viridiplantae
CC(C)CCCC(O)CC1(C)C(=O)CCC2(C)C1C(O)CC1(C)C2CCC23CC12CCC1(C)CCC(C)C(C)C13	2021	New skeletons	Triterpenoids	Globimetula	Viridiplantae
C=C(C(=O)O)C1CC[C@H](C)C2=C1C(=O)[C@H](C)CC2	2021	New modifications	Sesquiterpenoids	Lindera	Viridiplantae
CC/C(C)=C/C(=O)O[C@H]1[C@H](O[C@@]2(C)CCC3[C@H](C4C2CC[C@H]4C)C3(C)C)O[C@H](C)[C@@H](O)[C@@H]1O	2021	New modifications	Sesquiterpenoids	Calendula	Viridiplantae
C/C=C(\C)C(=O)O[C@@H]1[C@@H](O)[C@H](C)[C@@]2(C)CC3=C(C)C(=O)O[C@H]3C[C@@]2(O)[C@@H]1OC(=O)/C(C)=C/C	2021	Site combinations	Sesquiterpenoids	Parasenecio	Viridiplantae
CC(C)=C1CC2=C(C)C(=O)[C@@H]3[C@H]4C(=O)[C@@](C)([C@@]56C=C7C(C)(C)OO[C@@]7(O)C[C@@H](C)[C@@]45O6)[C@@]23[C@@H](C)CC1=O	2021	New sites	Sesquiterpenoids	Parasenecio	Viridiplantae
CC(C)(O)[C@H]1CC[C@H]([C@@H]2CC[C@@]3(C)C4=C([C@H](O)C[C@]23C)[C@@]2(C)CC[C@H](O)C(C)(C)[C@@H]2CC4=O)[C@@H]1O	2021	New modifications	Triterpenoids	Inonotus	Fungi
C/C1=C2\CC[C@H](C)[C@@H]2CC[C@@H](C)C2=C[C@]3(C)[C@@H](C[C@@H]21)[C@H](C(C)C)C[C@H]3O	2021	New sites	Sesterterpenoids	Aspergillus	Fungi
CC1=C[C@@H]2[C@H](CC1)C(C)=CC[C@H]2[C@H](C)CCC[C@@H](C)[C@H]1OCC2OC(O1)C(O)[C@H](O[C@H]1O[C@@]3(O)CCC4=CCC[C@H](C)[C@@]4(C)[C@H]3[C@@H]1C)[C@@H]2O	2021	New modifications	Diterpenoids	Lemnalia	Metazoa
CO[C@H]1O[C@@H](OC)[C@](O)([C@@H]2CC=C3[C@@]2(C)CC[C@@H]2C4C=CC(=O)C(C)(C)[C@@H]4[C@@H](OC(C)=O)[C@@H](OC(C)=O)[C@@]32C)[C@H]1O	2021	New skeletons	Triterpenoids	Chisocheton	Viridiplantae
C=C1CC[C@@]23[C@H](C)CC[C@@H]2[C@@]3(C)[C@@H]2C[C@@H]3[C@H](C(C)C)CC[C@@]3(C)C[C@@H]12	2021	Site combinations	Sesterterpenoids	Fusarium	Fungi
CCC(C)C(=O)C1=C(OC)C=C(O)[C@](C)(CC=C(C)C)C1=O	2021	New skeletons	Meroterpenoids	Hypericum	Viridiplantae
C[C@@H]1[C@@H]2C[C@@H](O)[C@H]3[C@](C)(CO)CCC[C@]3(C)[C@H]2C=C2NC(=O)C[C@@H]21	2021	New modifications	Diterpenoids	Caesalpinia	Viridiplantae
CC[C@H](O)/C=C/C=C/C=C/C(=O)O[C@H]1CC[C@@]2(C)[C@@H](CC[C@]3(C)[C@@H]2CC=C2[C@@H]4CC(C)(C)CC[C@]4(C)CC[C@]23C)C1(C)C	2021	Site combinations	Triterpenoids	Euphorbia	Viridiplantae
C=C1[C@@H](OC(=O)c2ccccc2)C[C@H]2[C@@H](/C=C(/C)C(=O)[C@@]3(OC(C)=O)C[C@H](C)[C@H](OC(=O)/C=C/c4ccccc4)[C@@H]3[C@H]1OC(C)=O)C2(C)C	2021	New modifications	Diterpenoids	Euphorbia	Viridiplantae
COC(=O)C1CC(OC(C)=O)CC2C1(C)C1CCC3(C)C(O)CCC123	2021	New skeletons	Diterpenoids	Dictyota	Others
C[C@@H](C[C@@H]1C[C@@H](C)C(=O)O1)[C@]1(C)CC=C2C3=C(CC[C@]21C)[C@@]1(C)CC[C@H](O)C(C)(C)[C@@H]1CC3	2021	New modifications	Triterpenoids	Nothotsuga	Viridiplantae
CC1(C)C2CC[C@]3(C)C(CC=C4C5[C@](C(=O)O[C@@H]6O[C@H](CO)[C@@H](O)[C@H](O)[C@H]6O)(CC[C@@H](CO)[C@@]5(C)O)CC[C@]43C)[C@@]2(C)C[C@@H](O)[C@@H]1O	2021	Site combinations	Triterpenoids	Potentilla	Viridiplantae
CC1(C)CC[C@]2(C(=O)O)CC[C@]3(CO)C(=CCC4[C@@]5(C)CC[C@H](O[C@@H]6OC[C@H](O)[C@H](O)[C@H]6O[C@@H]6O[C@H](CO)[C@@H](O)[C@H](O)[C@H]6O)[C@@](C)(CO)C5CC[C@]43C)C2C1	2021	Site combinations	Triterpenoids	Anemone	Viridiplantae
[C][C@]1(CO)C2CC[C@]3(C)C(CC=C4C5CC(C)(C)CC[C@]5(C(=O)O[C@@H]5O[C@H](CO)[C@@H](O)[C@H](O[C@H]6O[C@H](O)[C@H](O)[C@@H](O)[C@H]6O)[C@H]5O)CC[C@]43C)[C@@]2(C)C[C@@H](O)[C@@H]1O[C@H]1OC[C@@H](O)[C@H](O)[C@@H]1O	2021	New sites	Triterpenoids	Elsholtzia	Viridiplantae
COC(=O)[C@]12CO[C@H]3C[C@@H](C)[C@]4(C[C@@H](c5ccoc5)OC4=O)C(=C31)CC[C@@H]2OC(C)=O	2021	New sites	Diterpenoids	Croton	Viridiplantae
C[C@H]1CC[C@H]2CCC(=O)C(C(C)(C)O)=C[C@@]12OO	2021	New sites	Sesquiterpenoids	Sarcophyton	Metazoa
CC(C)C/C=C/[C@@](C)(O)[C@H]1CC[C@](C)(NC=O)CC1	2021	New modifications	Sesquiterpenoids	Halichondria	Metazoa
COC(=O)[C@H]1CC[C@@]2(C)C(CC[C@]3(C)C2CCC2C4[C@H](C)C(C=O)=CC[C@]4(C)CC[C@]23C)C1(C)C	2021	New sites	Triterpenoids	Pulicaria	Viridiplantae
COC(=O)[C@H]1C2CC[C@@H]3[C@]4(CC[C@]5(C)[C@@H]([C@H](C)C/C=C/C(C)(C)OC)CC[C@@]35C)C[C@]24CC[C@@H]1OS(=O)(=O)[O-]	2021	Site combinations	Triterpenoids	Tricleocarpa	Others
CC(=O)O[C@H]1C[C@@]23C[C@@]24C=CC(=O)OC(C)(C)[C@@H]4CC[C@H]3[C@]2(C)CC[C@H]([C@H](C)[C@H]3CC=C(C)C(=O)O3)[C@@]12C	2021	Site combinations	Triterpenoids	Schisandra	Viridiplantae
C/C=C(\C)C(=O)OC[C@@]1(CC(=O)c2ccoc2)[C@H]2CCC=C(C(=O)O)[C@]2(C)CC[C@H]1C	2021	New modifications	Diterpenoids	Croton	Viridiplantae
C=C1C2=C(CC[C@@H](C)[C@@H]3C[C@]4(C)CC(=O)[C@@H](C(C)C)[C@H]4C[C@@]13O)[C@H](C)CC2	2021	Site combinations	Sesterterpenoids	Gentianella	Viridiplantae
CC1(C)C[C@H](O)C[C@@]2(C)C1CC[C@]1(C)C2CCC2[C@]3(C)CC[C@H](C(C)(C)O)C3CC[C@]21C	2021	New modifications	Triterpenoids	Aspergillus	Fungi
C[C@H]1CC[C@@H]2[C@@H](O)C[C@@H]3C(=C[C@@]4(C)CC[C@]5(C)[C@@H](O)CC(C)(C)[C@@H]5[C@@H]34)[C@]12C	2021	New skeletons	Sesterterpenoids	Penicillium	Fungi
C[C@@]1(CO)C[C@H]2C[C@]3(O)CO[C@](C)([C@H]2C1)C31CC1	2021	Site combinations	Sesquiterpenoids	Daedaleopsis	Fungi
C=C[C@@]1(C)CCC2=C(C[C@@H](O)[C@H]3C(C)(C)CC[C@H](O)[C@]23C)[C@@H]1OC	2021	New modifications	Diterpenoids	Kaempferia	Viridiplantae
COC(=O)[C@@H]1C2=CC(=O)O[C@]2(O)C[C@H]2[C@H]1[C@@H](OC(C)=O)C[C@@]1(O)C(C)(C)CCC(=O)[C@]21C	2021	New modifications	Diterpenoids	Guilandina	Viridiplantae
C=C1[C@@]2(C)C[C@@H]3[C@](C)(CC[C@@]4(C(C)(C)O)OC(=O)CC[C@@]34C)[C@]1(C(=O)OC)C(=O)[C@@](C)(O)C2=O	2021	New sites	Meroterpenoids	Penicillium	Fungi
C=C[C@]1(C)C=C2C(=O)C[C@H]3C(C)(C)CC[C@@H](O)[C@]3(C(=O)O)[C@H]2CC1	2021	Site combinations	Diterpenoids	Aspergillus	Fungi
C[C@@H]1CC[C@]2(C(=O)O)CC[C@]3(C)C(=CC[C@@H]4[C@]5(C)[C@@H](CC[C@]43C)C(C)(C)[C@@H](O)C[C@H]5O)[C@@H]2[C@]1(C)O	2021	Site combinations	Triterpenoids	Potentilla	Viridiplantae
C[C@]12CC[C@H](O)[C@]34[C@@H](NC1)[C@H](C[C@H]23)[C@@]12CC[C@@H](C[C@H]14)[C@@](O)(CO)C2=O	2021	New modifications	Diterpenoids	Aconitum	Viridiplantae
CC(=O)O[C@@H]1C[C@@H](/C(C)=C\C=C\C(C)(C)O)[C@@H]([C@H]2C(=O)C=C[C@H]2C)[C@@H]1C=O	2021	New sites	Diterpenoids	Rugulopteryx	Others
C=C1C(=O)O[C@@H]2C[C@]3(C)[C@H](CC[C@H](C)O)C[C@@]4(C(=O)O[C@@H]5C[C@]6(C)[C@@H](CC[C@@H](C)O)[C@@H]6C[C@@H]54)[C@@H]3C[C@H]12	2021	New modifications	Sesquiterpenoids	Carpesium	Viridiplantae
Cc1coc2c1C(=O)C(=O)c1c-2ccc2c1CCC[C@@]2(C)O	2021	New modifications	Diterpenoids	Salvia	Viridiplantae
[truncated: 12,575 more rows]
